# Supplementary material for: Delineation of the Germline and Somatic Mutation Interaction Landscape in Triple-Negative and Non-Triple-Negative Breast Cancer
Source: Int J Genomics. 2020 Jul 6;2020:2641370. doi: 10.1155/2020/2641370 (PMC7364202; doi:10.1155/2020/2641370)
Supplement: Supplementary Materials — All additional results from the analysis are shown in the supplementary tables described. Supplementary Table SG: GWAS information-genetic variants and genes associated with an increased risk of developing breast cancer. Supplementary Table SM: somatic mutated genes significantly associated with TNBC vs. control and non-TNBC vs. control. Supplementary Table SN: nonsomatic mutated genes significantly associated with TNBC vs. control and non-TNBC vs. control. Supplementary Table S2A1: list of all somatic mutated genes significantly associated with TNBC. Supplementary Table S2A2: list of all somatic mutated genes significantly associated with non-TNBC. Supplementary Table S1: differentially expressed and uniquely somatic mutated genes between TNBC and non-TNBC. Supplementary Table SA3: significantly differentially expressed germline mutated genes with and without somatic mutations in TNBC. Supplementary Table SB3: significantly differentially expressed germline mutated genes with and without somatic mutations in non-TNBC. Supplementary Table S3A: genes containing both germline and somatic mutations significantly associated with TNBC. Supplementary Table S3B: genes containing both germline and somatic mutations significantly associated with non-TNBC. Supplementary Table S3C: a complete list of 251 genes containing both germline and somatic mutations distinguishing TNBC from non-TNBC. [file 2641370.f1.zip]

Archive with 11 entries (11 files):
- mat.2641370.v2/SM.xlsx
- mat.2641370.v2/SN.xlsx
- mat.2641370.v2/TABLE S1.xlsx
- mat.2641370.v2/TABLE S2A1.xlsx
- mat.2641370.v2/Table S2A2.xlsx
- mat.2641370.v2/TABLE S3B.xlsx
- mat.2641370.v2/TABLE S3C.xlsx
- mat.2641370.v2/TABLE SA3.xlsx
- mat.2641370.v2/TABLE SB3.xlsx
- mat.2641370.v2/Table SG.xlsx
- mat.2641370.v2/TABLES S3A.xlsx
