# Supplementary material for: Delineation of the Germline and Somatic Mutation Interaction Landscape in Triple-Negative and Non-Triple-Negative Breast Cancer
Source: Int J Genomics. 2020 Jul 6;2020:2641370. doi: 10.1155/2020/2641370 (PMC7364202; doi:10.1155/2020/2641370)
Supplement: Supplementary Materials — All additional results from the analysis are shown in the supplementary tables described. Supplementary Table SG: GWAS information-genetic variants and genes associated with an increased risk of developing breast cancer. Supplementary Table SM: somatic mutated genes significantly associated with TNBC vs. control and non-TNBC vs. control. Supplementary Table SN: nonsomatic mutated genes significantly associated with TNBC vs. control and non-TNBC vs. control. Supplementary Table S2A1: list of all somatic mutated genes significantly associated with TNBC. Supplementary Table S2A2: list of all somatic mutated genes significantly associated with non-TNBC. Supplementary Table S1: differentially expressed and uniquely somatic mutated genes between TNBC and non-TNBC. Supplementary Table SA3: significantly differentially expressed germline mutated genes with and without somatic mutations in TNBC. Supplementary Table SB3: significantly differentially expressed germline mutated genes with and without somatic mutations in non-TNBC. Supplementary Table S3A: genes containing both germline and somatic mutations significantly associated with TNBC. Supplementary Table S3B: genes containing both germline and somatic mutations significantly associated with non-TNBC. Supplementary Table S3C: a complete list of 251 genes containing both germline and somatic mutations distinguishing TNBC from non-TNBC. [file 2641370.f1.zip › mat.2641370.v2/SM.xlsx]

## Sheet: 07.TNBC.5502.DE.Som.comm.gene.e
Table SM. Somatic mutated genes significantly associated with TNBC vs control and non-TNBC vs control.
Genes	logFC	adj.P.Val	TNBC Somatic Mutation Event	non-TNBC Somatic Mutation Event
SYNE1	-1.0438	1.11417e-44	9
SPTA1	-0.0584357	4.5843e-05	9
PIK3CA	-0.456702	2.58966e-09	8
MUC5B	1.57094	8.86779e-21	8
DST	-2.38271	1.88211e-50	8
DNAH17	0.262012	4.7446e-05	8
USP34	-0.345747	0.000850126	7
SMG1	-0.16972	0.0401141	7
PLEC	0.372631	0.000153621	7
KMT2D	-0.402272	9.51689e-07	7
FLG	-0.0494661	0.0182049	7
CSMD2	0.349138	1.38407e-12	7
CREBBP	-0.333191	3.83386e-06	7
ASPM	2.2928	3.26788e-68	7
AHCTF1	0.464525	2.54052e-09	7
ZNF512B	0.465092	2.72808e-08	6
STAB1	-0.598916	2.20154e-06	6
SPTBN1	-1.5303	2.22878e-34	6
SAGE1	0.0624707	0.0459103	6
MFI2	1.22184	5.09295e-13	6
LYST	-0.700404	1.3897e-21	6
LRP1	-1.87633	5.48628e-33	6
LAMA3	-2.34956	3.55326e-41	6
KIF26B	1.19194	9.80238e-26	6
IGSF10	-1.60174	2.62554e-38	6
F5	0.459244	6.46784e-08	6
COL18A1	0.351027	0.00757425	6
CENPE	1.65686	2.29031e-60	6
CACNA1B	0.260375	9.7873e-08	6
ARID1B	-0.267464	7.24754e-05	6
AHNAK	-2.63018	2.29168e-61	6
ZFP64	0.478732	9.76845e-20	5
ZFHX4	-0.798026	3.62282e-16	5
VWF	-2.32274	8.88184e-43	5
TRPM5	0.0675074	0.0487786	5
TPR	0.244216	0.000859264	5
TNXB	-3.17438	3.00963e-67	5
TNRC6B	-0.256264	9.59053e-06	5
TNIK	-0.355977	0.000484143	5
TG	0.102781	0.0212185	5
TENM1	-0.166549	0.00517324	5
TDRD5	0.458518	3.90625e-05	5
TCF20	0.543505	8.31762e-10	5
SYNE2	-0.722469	2.81206e-14	5
SUPT6H	-0.288586	1.19566e-06	5
SLC12A5	0.160182	2.87299e-07	5
SACS	-0.45005	9.2685e-08	5
RYR3	-0.415128	2.97126e-15	5
RPGR	-0.586339	4.49454e-29	5
RNF213	0.270018	0.00692116	5
PXDNL	0.206488	0.00880287	5
PTEN	-1.10163	1.10221e-32	5
PREX1	-0.820307	6.40917e-09	5
PLIN4	-5.43637	1.25084e-52	5
PKHD1L1	-0.480762	2.08292e-22	5
PKD1L1	-0.20894	2.13189e-19	5
PCDH19	-0.944357	8.03875e-44	5
NF1	-0.538971	2.1085e-12	5
NBAS	-0.343496	9.07356e-11	5
MXRA5	0.422379	0.00219219	5
MECOM	-0.921827	4.14749e-22	5
MAP1A	-1.03892	5.51161e-31	5
LRP2	-1.43181	1.31843e-13	5
LAMB4	-0.026947	0.00454395	5
ITPR2	-0.819043	1.1356e-10	5
ITIH1	0.0174578	0.0084338	5
ITGAX	0.777884	2.7463e-13	5
HSPG2	-1.04234	1.04825e-11	5
HSPA12A	-1.50584	2.99304e-29	5
GPR98	-0.59556	3.56244e-19	5
GOLGB1	-0.57131	1.64147e-12	5
GCC2	-0.636858	5.76502e-15	5
FRG1	-0.298456	8.85789e-07	5
FREM1	-1.4095	1.76507e-47	5
FHOD3	-0.890003	1.62409e-19	5
FBXW7	-0.543736	2.17807e-17	5
FAM65C	-0.49871	7.44164e-18	5
ERBB4	-1.61174	9.03183e-41	5
DOCK4	-0.451109	3.21509e-10	5
DNAH5	-0.52714	7.48742e-15	5
DNAH3	0.0653467	0.0021344	5
DLC1	-1.71277	5.37441e-37	5
DIDO1	-0.140834	0.0150071	5
CYP26B1	-0.713294	5.62371e-07	5
C2orf16	-0.109856	8.19021e-05	5
C15orf39	0.292601	2.04958e-05	5
BRCA1	0.418841	3.94602e-07	5
APOB	-0.755248	4.70386e-20	5
ANKRD36C	-0.390878	1.42408e-08	5
ANKRD30BL	0.0125555	0.0172312	5
ANKRD30A	-2.08226	4.07474e-31	5
AK9	-0.148983	0.000773741	5
ACTN2	0.277927	0.0253113	5
ABCA13	0.285784	2.23226e-06	5
ZNF687	0.612504	1.48302e-15	4
ZNF469	1.03653	1.33927e-20	4
ZNF318	0.168645	0.0279262	4
ZFYVE28	-0.3082	4.51857e-12	4
ZFPM2	-0.762379	3.45914e-20	4
ZDBF2	-0.673554	1.32834e-17	4
XPO1	0.475746	4.79107e-13	4
VPS13D	-0.807232	2.4249e-25	4
UTRN	-1.73842	4.20993e-46	4
UBR2	-0.241083	0.000820465	4
UBN2	-0.181988	0.00287292	4
TUBBP5	0.40603	3.20982e-06	4
TTF2	0.531616	3.19956e-16	4
TRPM6	-0.165899	1.13666e-05	4
TRO	-0.640593	2.16809e-10	4
TRIM46	0.657458	1.1401e-17	4
TNRC6C	-0.525104	4.32462e-12	4
TMPRSS15	0.035165	0.0397599	4
TLN1	-0.64143	1.35715e-15	4
TECTA	-0.131465	7.24636e-19	4
TCHH	0.0897823	0.0130551	4
SZT2	-0.305747	3.71272e-09	4
SUPT5H	0.665984	3.52738e-17	4
STXBP5	-0.255013	4.38586e-05	4
SRRM2	-0.441566	1.35237e-08	4
SPG20	-0.912283	1.8209e-31	4
SPAG17	-0.196455	7.67049e-05	4
SP100	-0.266752	0.000112972	4
SNRNP200	0.196176	0.00745098	4
SMC6	0.805011	1.17272e-30	4
SERPINE1	0.628041	0.000803731	4
SCN2A	-0.538107	1.72829e-12	4
SCN1A	0.0788231	0.00326427	4
RPLP0P2	0.657485	1.63086e-28	4
RP1	-0.0298803	0.0128904	4
ROBO3	-0.762671	3.87016e-27	4
RIMBP2	-0.164036	1.02329e-08	4
REPIN1	0.338312	1.11626e-05	4
RELN	-1.09111	8.35934e-21	4
RBMX	0.129311	0.0411937	4
RALGAPA2	-0.910146	9.84375e-25	4
PRUNE	0.584519	2.90029e-15	4
PRUNE2	-0.74794	4.13643e-18	4
PREX2	-1.53886	3.49111e-46	4
PKD1L2	-0.353774	2.0306e-14	4
PDE1B	-0.85075	7.42454e-19	4
PCLO	-0.415365	1.01723e-12	4
PASK	0.522123	4.12158e-18	4
OTUD7A	-0.258275	5.67924e-42	4
NRXN2	-0.139787	0.0363437	4
NOTCH1	0.285243	0.00241286	4
NIPBL	-0.407114	4.08618e-07	4
NBEA	-0.793029	1.439e-21	4
NAV3	-0.928839	3.46443e-51	4
MYT1	0.0944775	0.00559757	4
MYO15A	-0.0278156	0.0296592	4
MYO10	1.13408	1.55776e-25	4
MYH11	-3.87181	4.31985e-71	4
MYH10	-0.729223	1.48171e-14	4
MUC6	-0.967342	1.34293e-08	4
MSH3	-0.663319	2.45327e-30	4
MROH5	0.0135736	0.021526	4
MEGF8	-0.456133	4.98487e-08	4
MAP3K12	-0.551596	9.56118e-21	4
MACF1	-0.442241	2.90908e-07	4
LRRC32	-1.18238	2.01466e-19	4
LRP1B	-0.27469	1.19983e-12	4
LINC00969	-0.146691	0.0182206	4
LGR5	0.488438	0.000474965	4
LAMA2	-2.26267	3.34891e-54	4
KIF5C	-0.716096	4.65833e-12	4
KIF4A	2.93294	1.86555e-83	4
KIF24	0.729045	8.18033e-31	4
KIAA1244	-0.40278	0.00865218	4
KIAA0907	0.695354	4.49643e-16	4
KCNU1	-0.0430123	3.82274e-07	4
KAT6B	-0.720603	1.00877e-18	4
ITSN2	-0.334371	2.09245e-07	4
ITIH4	-0.0395996	0.000396681	4
IQGAP3	2.83865	3.35037e-71	4
IQGAP2	-1.4501	3.63672e-23	4
INPP5B	-0.258998	4.76335e-06	4
IDS	-0.62396	2.0096e-16	4
HMCN1	-0.808771	1.54087e-13	4
HIVEP2	-0.333352	2.7917e-06	4
HERC2	-0.432923	5.39209e-11	4
HERC1	-0.867964	7.81024e-27	4
HCFC1	0.506296	1.0696e-14	4
GYG2	-2.85532	5.42417e-32	4
GPR112	-0.0326682	2.39274e-07	4
GON4L	0.174151	0.00797363	4
FRMPD2	-0.212828	7.86725e-10	4
FREM2	0.329155	6.86041e-06	4
FGD5	-1.19885	1.88378e-28	4
FAT1	-0.292526	0.0201302	4
FANCI	1.74466	1.04308e-53	4
FAM49B	0.91536	4.2279e-37	4
ESPNP	0.133633	5.79034e-10	4
EPHB3	1.55861	1.5102e-13	4
EPB41L3	-0.804641	2.19771e-13	4
EML5	-0.131056	8.75421e-07	4
EIF2AK4	-0.254013	1.13338e-07	4
EFR3B	0.30683	0.000451433	4
DYNC2H1	-1.04475	9.12307e-39	4
DSCAM	-0.0272512	0.0428009	4
DOCK9	-0.814096	3.78893e-19	4
DNAH9	-0.155769	1.29428e-15	4
DNAH14	0.474319	8.45418e-28	4
DMD	-1.57608	2.41829e-40	4
DENND5B	-0.687268	3.34736e-22	4
DDX55	0.341024	1.26073e-08	4
DDX26B	-0.173387	0.0334287	4
CUL7	0.311834	0.000591331	4
CSRNP3	-0.740159	3.90002e-18	4
CPS1	-0.571427	1.77889e-15	4
COL6A6	-1.4552	7.47241e-47	4
COL6A5	0.0536676	1.41571e-07	4
COL5A1	1.2615	5.747e-15	4
COL19A1	0.12664	0.00204932	4
CNTNAP2	0.439496	2.35289e-05	4
CLIP2	0.34128	8.52952e-06	4
CKAP5	0.937177	2.42585e-27	4
CHD6	-0.602207	1.85219e-11	4
CHD2	-0.423006	7.1711e-10	4
CELSR3	0.552143	6.40326e-16	4
CCDC168	0.0176798	3.38533e-06	4
CARD11	0.514967	4.32236e-07	4
CACNA1F	-0.162146	2.66456e-14	4
CACNA1E	0.0529907	0.000283626	4
BZRAP1	-0.336778	0.00296166	4
BRWD1	-0.207316	0.00156917	4
BIRC6	-0.220006	0.0102672	4
BCORL1	-0.14174	0.0139668	4
BAZ2B	-0.725727	2.91545e-23	4
ATXN7L1	-0.117093	0.0397726	4
ATXN2	-0.105398	0.0143662	4
ASXL3	-0.125177	0.00137439	4
ASTN1	-0.396529	1.01237e-11	4
ARHGAP5	-0.725539	6.22093e-15	4
ARHGAP24	-0.969957	4.05162e-44	4
ARFGEF1	0.19803	0.0200632	4
APOBR	0.636869	3.95077e-08	4
ANK2	-1.38847	1.32255e-41	4
AMPD1	-0.628706	1.1381e-10	4
AGAP1	-0.281012	0.000116583	4
ACE	-0.302209	3.54236e-05	4
ABCC10	0.540927	3.19932e-18	4
AARS	0.63427	4.70691e-19	4
ZNFX1	-0.191683	0.00579961	3
ZNF99	-0.0468359	0.0143031	3
ZNF780A	-0.309816	3.66029e-07	3
ZNF613	-0.158436	0.00314431	3
ZNF526	0.319598	2.12259e-09	3
ZNF518B	0.211991	0.00380542	3
ZNF438	-0.289711	8.56774e-08	3
ZNF407	-0.291678	4.40191e-10	3
ZNF175	-0.766065	5.20955e-37	3
ZNF169	-0.100862	0.00830585	3
ZNF106	-1.37058	1.24447e-36	3
ZCCHC2	-0.155051	0.0148561	3
ZC3H13	-0.627305	6.52406e-18	3
XRN1	-0.20087	0.0102925	3
XIRP1	0.444966	2.05474e-05	3
WDR81	-0.276304	0.000117927	3
WDR37	-0.128521	0.0341763	3
WDR17	-0.310123	1.56915e-14	3
WDFY4	0.292978	0.000305759	3
VWA3A	-0.0536537	0.00267197	3
VPS13C	-1.0048	4.84485e-28	3
VPS13A	-0.535806	7.76403e-15	3
VILL	-0.426452	5.78022e-12	3
VANGL2	1.04217	1.65554e-10	3
USP36	0.313299	5.23338e-06	3
USP1	0.919159	1.59361e-16	3
UNC80	0.104678	0.000462068	3
UNC5B	1.03267	1.16082e-22	3
UGT2B15	-0.863982	4.46834e-13	3
UCK2	0.993743	1.79381e-23	3
UBR3	-0.649666	3.35871e-17	3
UBC	-0.26306	2.686e-06	3
UBA1	0.549297	3.70716e-19	3
U2SURP	0.189248	0.00989046	3
TYRP1	0.301715	4.6285e-06	3
TYRO3	-0.702142	4.72596e-10	3
TULP3	0.25872	0.000206505	3
TUBA3E	-0.113017	0.00120724	3
TTC3	-0.385923	1.18574e-06	3
TSR1	0.19746	0.00147931	3
TSC2	-0.213298	0.000156258	3
TRPM2	0.927236	2.0989e-24	3
TRPC6	-0.855822	6.53661e-38	3
TRPA1	0.219103	1.14423e-07	3
TROAP	2.38774	2.07499e-80	3
TRIM23	-0.970437	1.63835e-47	3
TRAPPC9	0.471973	6.92553e-12	3
TPO	-0.769704	9.83466e-45	3
TOPBP1	0.650811	3.5811e-15	3
TMEM131	-0.168292	0.00357717	3
TM4SF1	0.357733	0.018285	3
TLN2	-1.39271	1.45702e-35	3
THSD7A	-0.658258	1.06114e-23	3
THBS4	-1.53198	3.43714e-14	3
TFE3	-0.420542	4.4331e-09	3
TEX11	0.0752363	3.32519e-06	3
TET2	-0.203803	0.00311617	3
TET1	0.287197	3.16013e-05	3
TEP1	-0.286169	7.65162e-06	3
TENM2	-1.1008	7.95484e-25	3
TEC	-0.142888	6.38173e-05	3
TCP11L2	-0.964378	1.27695e-41	3
TBX3	-1.3464	3.27878e-21	3
TBX15	-1.61443	7.23563e-34	3
TBCD	0.470958	1.0403e-12	3
SYT9	-0.452016	2.14607e-13	3
SYT11	-0.301068	0.000771022	3
SYNE3	-1.6452	1.78143e-37	3
SVEP1	-2.88492	1.60387e-59	3
SUV420H1	-0.177963	0.00737511	3
SUGP1	0.37195	7.37767e-11	3
STX4	0.234394	0.0021248	3
STAT4	-0.175933	0.0135134	3
SSRP1	0.866037	1.60892e-25	3
SSPO	-0.0770787	0.000269438	3
SSC5D	-0.901924	1.08216e-15	3
SPTB	-0.204312	0.00114326	3
SPEF2	-0.465045	5.27428e-20	3
SOX13	-0.191726	0.0310018	3
SON	-0.354342	1.4745e-06	3
SNX8	0.661245	1.2127e-15	3
SNCAIP	-0.555728	3.49912e-13	3
SMC1A	0.465097	8.14043e-08	3
SMARCAD1	-0.277044	0.000312167	3
SMARCA4	1.10297	2.02068e-29	3
SMAP1	0.213996	3.78174e-05	3
SLC5A5	0.16543	0.00432254	3
SLC4A3	0.278934	0.00248708	3
SIPA1L2	0.464625	3.58561e-07	3
SIGLEC6	-0.147645	2.35853e-06	3
SIDT2	-1.13338	1.29262e-43	3
SHROOM3	-0.535771	0.000487113	3
SHISA6	-0.457664	5.40604e-20	3
SHE	-1.51174	1.78173e-52	3
SETBP1	-1.11044	2.05296e-30	3
SEMA4A	0.749962	3.19002e-10	3
SEC16B	-0.0300867	1.05343e-09	3
SDK2	-0.356954	0.000908165	3
SCYL1	0.539195	5.6537e-16	3
SCN7A	-0.92932	1.48494e-42	3
SCN5A	-0.180113	1.71039e-09	3
SCN11A	-0.257475	9.46892e-19	3
SAMD9	0.279304	0.00905537	3
RUSC1	1.07459	1.10578e-34	3
RPL13A	-0.221124	0.028933	3
RNF128	-0.777989	5.08593e-08	3
RFX1	0.118857	0.0290313	3
RFC1	-0.378047	4.38335e-08	3
RC3H1	-0.241176	2.88787e-05	3
RBM42	0.817752	3.856e-18	3
RBM22	-0.318075	2.34492e-09	3
RALY	0.889821	7.45318e-29	3
RALGAPB	-0.241893	0.000412866	3
RALGAPA1	-0.550445	8.41075e-19	3
RAI2	-2.5351	1.65469e-67	3
RAB13	0.638124	1.06457e-14	3
QSOX1	0.522264	4.49371e-05	3
QRICH2	0.461305	8.43089e-07	3
PTPRZ1	-0.384634	0.00745869	3
PTPRB	-1.79339	4.94171e-52	3
PRTG	-0.322606	4.67713e-18	3
PRRC2B	-0.540177	7.31572e-08	3
PROX2	-0.118987	4.33204e-16	3
PRICKLE3	0.293693	4.54344e-07	3
PPP1R12A	-0.49293	1.06455e-10	3
PPIP5K2	-0.29446	2.17885e-06	3
PPEF1	0.443434	7.00646e-06	3
POLA1	0.28276	4.39375e-05	3
PMEL	-0.715442	2.21305e-11	3
PLXNB3	0.323704	0.000772911	3
PLXNA3	0.700744	3.36782e-23	3
PLEKHG2	0.411575	6.34653e-07	3
PLCE1	-0.193125	0.00848274	3
PLAC8	0.306868	0.000234469	3
PLA2R1	-1.49876	2.15867e-41	3
PKD1	-0.571038	3.70765e-16	3
PIK3R4	-0.332524	3.56825e-08	3
PIK3CD	0.203131	0.0453437	3
PIK3C2B	-0.698379	1.85305e-22	3
PIGR	-3.37628	4.82064e-22	3
PIGQ	0.258742	0.00123181	3
PI4KB	0.416114	3.75521e-12	3
PHKB	-0.660543	4.15128e-21	3
PHACTR1	0.181637	0.010115	3
PER2	-1.62554	6.80552e-39	3
PER1	-2.26536	3.01144e-53	3
PEAR1	-1.74715	7.75191e-64	3
PDIA5	0.905178	5.65557e-29	3
PDE3A	-0.551136	4.34632e-08	3
PDCD11	0.531831	5.32102e-12	3
PCNXL2	0.194378	0.00580055	3
PCMTD2	-0.631995	5.43228e-14	3
PCDHGB4	-0.13951	0.00222903	3
PCDHGA5	-0.385572	1.01552e-23	3
PCDHB12	-0.463629	4.61307e-28	3
PCDHB10	0.194478	0.0014841	3
PCDHA13	-0.04176	1.05934e-07	3
PCDHA10	-0.163631	2.03816e-07	3
PCCB	0.199146	0.00470374	3
PARP1	1.23356	4.14973e-45	3
PAPPA2	-0.436861	2.54821e-28	3
PALB2	0.315895	1.62105e-07	3
PACS1	0.14305	0.00826272	3
P4HB	1.17225	1.52104e-34	3
OTOG	0.0154541	7.65152e-06	3
OGDHL	0.370943	4.45741e-08	3
NWD1	0.155018	0.0164603	3
NUSAP1	3.01428	4.19822e-73	3
NR5A2	-0.84735	5.04255e-48	3
NPLOC4	0.515159	2.41793e-15	3
NPHP1	-0.278804	2.96228e-18	3
NOTCH2	-0.464899	3.87505e-06	3
NOP14	0.173735	0.00616222	3
NLRP7	0.319479	9.99339e-06	3
NLRP13	-0.130227	1.38332e-12	3
NKTR	-0.623481	6.98059e-13	3
NID1	-0.71914	2.45586e-08	3
NES	-0.670213	5.82044e-05	3
NCOR1	-0.512725	3.094e-12	3
NCKAP5	-0.179175	0.0237539	3
NCF2	0.635017	2.67903e-07	3
NAALADL1	-0.66848	1.10695e-38	3
MYO9A	-0.722294	6.3231e-22	3
MYO16	-0.291969	6.19678e-10	3
MYH7B	-0.232234	9.2127e-11	3
MYH3	-0.400067	9.5494e-21	3
MYH1	-0.463131	8.86575e-09	3
MTPAP	0.469814	2.80187e-14	3
MTHFR	-0.425255	8.72396e-13	3
MTA2	0.657075	4.15548e-21	3
MST1L	-0.131968	4.73131e-08	3
MRPL55	0.94447	1.84066e-22	3
MPZL1	0.320198	0.000455499	3
MPG	0.367379	5.76325e-05	3
MMRN1	-2.6711	1.97289e-49	3
MIA3	-0.148062	0.0271906	3
2019-03-06	-0.335434	4.91337e-07	3
2019-03-10	0.0229123	0.0342734	3
MAPK6	0.257903	0.000555357	3
MAN2B2	-0.683384	9.96283e-20	3
MAN2B1	0.829794	9.58737e-24	3
MAN2A1	-0.455694	7.05166e-10	3
MAN1A1	-1.28643	3.06723e-22	3
MAMLD1	0.189006	0.0478596	3
MAML2	-0.821337	5.01873e-14	3
LTBP4	-1.94619	1.03701e-43	3
LSM14B	0.78535	1.97071e-26	3
LRRK2	-0.73062	3.06599e-27	3
LRRC8C	-0.372821	8.42944e-05	3
LRRC37A3	-0.134891	0.000630141	3
LPP	-0.875937	5.02146e-22	3
LPHN3	-0.583791	3.56404e-13	3
LOXHD1	-0.0891454	3.0708e-07	3
LIG1	0.965718	8.56985e-22	3
LHCGR	-0.30855	1.10014e-16	3
LGR4	-1.09987	1.8059e-21	3
LCT	0.316126	4.98319e-08	3
LAMB2	-1.47323	6.50831e-39	3
L1CAM	0.543696	3.57037e-05	3
KPNA2	2.52739	2.1904e-68	3
KMT2C	-0.599589	2.96725e-12	3
KIFC1	3.24627	2.93738e-84	3
KIF27	-0.237703	1.1249e-05	3
KIF21A	0.532442	7.90121e-10	3
KIF20B	0.740647	3.11008e-20	3
KIAA1429	0.154485	0.0209879	3
KIAA1033	-0.368544	1.344e-07	3
KIAA0825	-0.270131	1.5196e-15	3
KIAA0319L	-0.342838	3.7711e-05	3
KCNV1	0.0756714	0.000149581	3
KCNQ3	0.418501	3.30549e-07	3
KCNMA1	-1.08963	2.20586e-22	3
KCND3	-1.55497	2.46414e-43	3
KAT2A	0.262879	0.00367155	3
KANSL3	-0.335994	6.36904e-09	3
ITPR3	0.8063	4.81764e-10	3
ITGB6	-0.467506	0.0421821	3
ITGB2	1.03042	5.36618e-12	3
ITGAL	0.510432	5.98374e-05	3
INTS1	0.390341	2.15684e-06	3
INMT	-2.11442	1.49694e-58	3
IMPA2	1.16785	1.75449e-21	3
IL6ST	-2.36366	4.09382e-63	3
IKBKE	1.13998	7.62843e-24	3
IGFN1	-0.0944362	0.00196916	3
HRNR	-0.0402881	0.00346614	3
HRC	-0.829932	2.62767e-25	3
HPS3	0.196134	0.00966552	3
HNRNPU	0.554133	1.45381e-22	3
HMGXB3	-0.179579	0.00537487	3
HLA-C	0.898888	1.24319e-12	3
HELB	0.11497	0.029289	3
HECTD1	-0.590869	9.59276e-15	3
HEATR5A	-0.291799	3.03346e-06	3
HEATR1	0.624935	8.13283e-12	3
HAUS7	0.344686	3.59874e-16	3
GRM3	-0.0217254	2.47212e-07	3
GRIPAP1	0.177312	0.00686238	3
GRIN2B	-0.0824122	1.09746e-06	3
GRIA3	-0.312702	1.49765e-12	3
GREB1L	-0.268511	4.56278e-05	3
GREB1	-1.45404	7.12278e-24	3
GOLGA8G	-0.00542459	0.0314728	3
GOLGA1	-0.474296	9.05234e-20	3
GLB1	0.555048	8.24744e-15	3
GJA5	-0.335165	0.011023	3
GGA1	0.342589	3.13809e-08	3
GART	0.771049	1.45534e-27	3
GANAB	0.478268	3.24584e-12	3
FURIN	0.483021	3.41286e-06	3
FRYL	-0.592485	4.05866e-16	3
FRMD6	-1.32956	3.54622e-28	3
FMN2	-0.0712179	0.00909216	3
FLNC	-1.25525	5.75005e-21	3
FER1L6	0.0206208	0.0451613	3
FCHSD1	-0.268104	0.000591446	3
FBN2	0.951564	2.4002e-14	3
FANCD2	1.11046	3.04991e-38	3
FAM98A	0.56696	2.74641e-23	3
FAM86B2	-0.108511	3.61613e-05	3
FAM171B	-0.319079	0.00217393	3
FADS2	1.73002	4.03054e-20	3
EYS	-0.146022	4.90846e-07	3
EXO1	2.43599	7.42934e-71	3
ESPN	0.326383	0.0183431	3
ERGIC3	0.397403	5.45573e-08	3
EPS15	-0.398494	7.22074e-12	3
EPHB1	-0.682968	2.12294e-08	3
EPG5	-0.446573	8.12481e-12	3
EPB41L2	-1.01234	3.87315e-18	3
EP400	-0.182799	0.00161503	3
EP300	-0.301964	0.000425908	3
ENPP5	-0.316119	0.021455	3
ENAM	-0.0575126	2.97179e-05	3
ELTD1	-1.86399	9.77951e-42	3
EIF4A2	-0.452463	2.30267e-11	3
EGFR	-1.14738	7.03007e-13	3
E2F4	0.374013	1.42818e-12	3
DSCAML1	-0.136932	0.00132392	3
DOCK8	-0.548297	2.74289e-09	3
DOCK11	-1.41845	1.5832e-20	3
DNHD1	-0.209339	8.73615e-07	3
DNAJC13	-0.190801	0.00218159	3
DNAH8	0.0199894	1.94923e-06	3
DNAH7	-0.180627	3.7052e-22	3
DNAH6	-0.303549	1.95479e-35	3
DNAH11	0.230745	3.31747e-08	3
DNAH10	0.0399718	0.00158216	3
DMXL1	-1.08045	7.3258e-40	3
DMGDH	-0.890697	9.36621e-27	3
DIP2C	-0.652854	5.33325e-17	3
DGKD	-0.312017	0.000108443	3
DENND4B	0.400443	1.53769e-11	3
DDX11	0.900391	9.55918e-20	3
DALRD3	-0.497064	1.33231e-11	3
CYP7A1	-0.0446155	2.2048e-05	3
CYP4A11	-0.137135	5.20461e-06	3
CYBRD1	-2.77162	3.68874e-61	3
CXorf22	0.129928	1.23945e-08	3
CUBN	-0.238744	2.03599e-09	3
CPSF3L	0.205235	0.00237444	3
COPE	1.04188	1.77891e-28	3
COL7A1	-0.478598	0.000812219	3
COL4A5	-0.850645	2.58613e-09	3
COL14A1	-2.74899	1.13178e-43	3
CNTNAP1	-0.329952	8.69268e-09	3
CNTN6	-0.146738	3.19896e-12	3
CNTN1	-1.13892	7.56986e-19	3
CNNM2	-0.123271	0.000341445	3
CNKSR3	0.415216	9.15868e-10	3
CMYA5	-1.65972	4.54536e-30	3
CHST9	-0.623707	1.51589e-11	3
CHRNA1	0.15602	0.0244177	3
CHD9	-0.937898	6.54723e-29	3
CEP170	0.470099	3.58479e-09	3
CDH11	0.558912	2.0324e-06	3
CD9	0.652572	2.06566e-07	3
CD86	0.800654	1.46093e-14	3
CCPG1	-0.672111	1.62893e-27	3
CCDC74A	-0.686885	3.83778e-07	3
CCDC50	-0.880618	3.35763e-31	3
CCDC180	-0.074018	1.04721e-08	3
CASZ1	-0.301155	0.000682651	3
CASKIN2	-0.340083	2.87156e-06	3
CASKIN1	0.144581	7.90393e-05	3
CAMTA2	-0.601405	6.26738e-26	3
CACNA1H	-0.264381	0.000413342	3
CACNA1C	-0.464895	3.38728e-11	3
CA9	2.28106	6.52388e-25	3
C1orf127	0.0628024	0.0308253	3
C16orf62	-0.281926	1.31323e-07	3
BRINP3	0.403948	0.00475319	3
BPTF	-0.278085	0.00186488	3
BDP1	-0.723644	7.22156e-17	3
BBX	-0.546704	6.06771e-12	3
BAHCC1	0.196242	0.0279713	3
BACH2	-0.502024	3.60137e-12	3
B4GALNT4	1.44347	2.78174e-23	3
ATXN1	-0.306593	3.92454e-06	3
ATP9A	-0.785004	1.94166e-13	3
ATP2B4	-1.01991	1.58503e-20	3
ATP1A3	0.391016	2.94763e-07	3
ATP1A2	-2.95323	9.91932e-56	3
ATM	-0.430517	1.35237e-08	3
ATAD2B	0.258609	1.55227e-05	3
ASXL2	-0.276728	0.000116247	3
ASH1L	-0.425675	5.39119e-06	3
ASB13	0.196168	0.0373281	3
ARHGEF2	0.63636	7.44619e-13	3
ARHGEF1	0.636628	5.99098e-13	3
ARHGEF11	0.472644	1.31529e-10	3
ARHGAP42	-0.512573	2.50508e-11	3
ARHGAP35	-0.632272	4.32898e-15	3
ARHGAP26	-0.78813	3.9178e-23	3
ARAP3	-0.796162	2.66869e-23	3
AQR	-0.363839	7.60765e-10	3
APC	-0.727897	1.51286e-23	3
ANKRD30B	-0.432085	2.84935e-15	3
ANKAR	-0.321157	7.27666e-20	3
ANK3	-0.214528	0.014643	3
AMER1	0.64685	4.08548e-22	3
ALS2	-0.156747	0.00712933	3
ALOX15B	-1.48367	3.35593e-07	3
AKAP9	-0.435134	2.70233e-06	3
AKAP13	-0.477188	2.12072e-08	3
AIM1	-0.531552	2.92615e-05	3
AGO3	-0.190794	8.3741e-05	3
ADCY9	-0.677669	1.31268e-25	3
ADCY2	0.234994	0.0114166	3
ADAMTSL3	-0.461748	5.03819e-07	3
ACTN4	0.417606	1.78899e-05	3
ABR	-0.449255	1.93143e-10	3
ABCD3	-0.312251	7.80924e-05	3
ABCB5	-0.621836	2.56411e-34	3
ABCA9	-2.33058	7.96543e-68	3
ABCA6	-1.47361	2.33854e-58	3
ABCA10	-1.56935	4.60584e-72	3
AAK1	-0.184617	0.000103026	3
TTN	-0.179347	0.0127127	27
ZSWIM4	1.1235	8.38309e-29	2
ZSCAN23	-0.313255	2.72015e-12	2
ZNRF1	0.490936	2.16491e-21	2
ZNRD1-AS1	-0.15338	5.6074e-05	2
ZNF91	-0.440338	2.7256e-08	2
ZNF878	0.12967	1.07128e-06	2
ZNF876P	-0.141888	2.72823e-05	2
ZNF841	-0.205492	0.00634183	2
ZNF81	-0.106099	0.0449112	2
ZNF805	-0.214161	0.000108167	2
ZNF800	-0.266574	2.52128e-05	2
ZNF780B	-0.366586	1.08008e-07	2
ZNF773	-0.101727	0.0139334	2
ZNF75D	-0.366954	7.01452e-11	2
ZNF730	0.308306	2.82605e-10	2
ZNF717	-0.201459	9.17233e-06	2
ZNF716	0.06277	0.00342382	2
ZNF71	0.179034	0.000241982	2
ZNF689	-0.637726	1.00172e-10	2
ZNF669	0.319261	3.29978e-05	2
ZNF615	-0.559102	8.22661e-18	2
ZNF607	0.191353	0.0142649	2
ZNF597	-0.426798	5.21754e-14	2
ZNF595	-0.598651	4.01127e-18	2
ZNF587	-0.200464	0.0152636	2
ZNF560	0.160096	0.0053096	2
ZNF549	-0.196581	0.000173064	2
ZNF541	-0.150592	0.00262233	2
ZNF540	-0.758992	5.59756e-38	2
ZNF496	0.401285	2.40263e-07	2
ZNF417	-0.306614	2.50559e-06	2
ZNF395	-1.02787	1.83673e-34	2
ZNF34	-0.314193	8.6207e-08	2
ZNF334	-0.500248	6.64052e-09	2
ZNF254	-0.145313	0.0425517	2
ZNF251	0.283219	0.000164074	2
ZNF236	-0.160543	0.00481262	2
ZNF235	-0.1056	0.00786392	2
ZNF232	0.372603	1.71709e-05	2
ZNF208	-0.258416	5.20568e-11	2
ZNF205	0.543811	8.28275e-10	2
ZNF181	-0.403413	1.08491e-12	2
ZNF17	-0.379507	2.96585e-15	2
ZNF143	-0.104212	0.0084467	2
ZMPSTE24	0.341457	1.1331e-07	2
ZIC3	0.0635214	0.011555	2
ZFYVE27	-0.157227	0.0223906	2
ZFYVE20	-0.596082	7.65015e-21	2
ZFP14	-0.380252	2.11437e-09	2
ZEB1	-1.31359	9.06074e-30	2
ZC3H7B	-0.269415	0.00013063	2
ZC3H11A	-0.141869	0.0297714	2
ZBTB5	0.269835	0.00044764	2
ZBTB4	-1.4507	3.55141e-72	2
ZBTB38	-0.806051	1.03855e-18	2
ZBTB37	-0.286383	3.80382e-07	2
ZBBX	0.0225577	0.0446966	2
ZAN	0.0143591	0.00942625	2
YY1AP1	0.403345	1.64977e-11	2
YTHDF2	0.263091	6.90376e-06	2
YLPM1	-0.472958	6.32058e-15	2
XPO6	0.692265	1.19114e-28	2
XPO5	1.18329	4.30447e-38	2
XPNPEP2	-0.970019	1.03526e-18	2
XIST	-1.60469	1.67362e-16	2
WSCD2	-0.535029	3.02237e-23	2
WRN	-0.335882	7.67361e-06	2
WRAP53	0.401272	1.84658e-13	2
WISP2	-1.82024	2.05998e-19	2
WHSC1	0.843997	2.05868e-27	2
WHAMMP2	-0.463104	1.3642e-42	2
WHAMM	-0.491483	4.42183e-18	2
WDTC1	-0.649468	5.4054e-23	2
WDR93	-0.403257	5.27028e-25	2
WDR90	0.26669	0.000498525	2
WDR66	0.158929	0.000207698	2
WDR6	-0.26401	0.00615124	2
WDR33	0.102415	0.01012	2
WDR11	-0.523299	2.39886e-13	2
WDPCP	-0.332629	3.38271e-13	2
WBSCR28	0.406021	4.42838e-13	2
WBSCR17	-0.277051	0.00488119	2
WBP1	-0.215145	0.00314019	2
WASL	-0.229912	0.00034936	2
VWA8	-0.804975	2.62385e-25	2
VRTN	0.193252	0.00123915	2
VPS51	-0.448347	7.86902e-06	2
VPS13B	-0.308464	4.0002e-05	2
VIT	-1.71325	4.79597e-28	2
VEPH1	0.30068	2.0301e-05	2
VCL	-0.650754	1.17016e-13	2
VCAN	0.96224	4.36063e-10	2
VAC14	0.367466	1.19805e-15	2
UTP14A	0.494195	8.97366e-15	2
USP6	-0.208064	7.67522e-08	2
USP5	0.791757	5.4222e-21	2
USP39	0.757353	3.69877e-31	2
USP33	-0.542937	3.06343e-16	2
USP13	0.2027	0.0246113	2
USHBP1	-0.992448	4.30245e-49	2
URB2	0.820618	5.29389e-25	2
UPF3B	0.763491	2.4328e-21	2
UPF2	0.344537	4.40189e-06	2
UNK	0.171724	0.0265641	2
UNC93A	0.116243	4.03342e-06	2
UNC13D	1.21694	1.32646e-21	2
UNC13C	-0.0409589	0.00178577	2
UNC13A	0.209036	3.78969e-05	2
UMODL1	0.440902	4.81322e-12	2
ULK3	0.496454	2.97922e-12	2
UBXN2B	0.285288	0.000431001	2
UBR4	-0.193242	0.0132416	2
UBQLN4	1.13544	4.43301e-37	2
UBE3D	0.185452	4.6222e-07	2
UBE3B	-0.37025	1.26481e-15	2
UBE2Q1	0.815974	1.9803e-38	2
UBAP2	0.525294	1.97501e-16	2
UAP1	0.634877	8.36631e-15	2
TXNDC16	-0.406695	2.30353e-05	2
TULP4	0.329414	1.57432e-06	2
TUBGCP6	-0.439298	5.95552e-08	2
TUBE1	-0.302084	5.54851e-08	2
TUBA3D	-0.194987	0.00318453	2
TTYH1	0.567507	0.00456159	2
TTLL7	-0.237884	0.00163612	2
TTC7B	-0.257443	4.75486e-08	2
TTC38	-0.680282	1.60657e-17	2
TTC28	-1.45143	3.38636e-59	2
TTC25	-0.355507	1.04408e-12	2
TTC24	0.175929	1.26743e-05	2
TTC17	-0.225087	0.000412278	2
TSPAN12	-0.429245	3.07688e-05	2
TSHZ3	-0.798681	1.15282e-26	2
TSHZ2	-2.04302	7.58242e-58	2
TSGA10	-0.247606	1.65502e-10	2
TRPV2	0.276213	0.00822326	2
TRPM8	0.462326	2.77293e-06	2
TRPM1	-0.0317027	2.41194e-11	2
TRPC1	-0.793762	3.07939e-32	2
TRMT112	0.638144	1.14783e-15	2
TRIO	-0.466281	1.20052e-08	2
TRIM73	-0.0212865	0.00028637	2
TRIM6	-0.630523	5.84236e-17	2
TRIM41	-0.10318	0.0326836	2
TRIM24	0.374046	1.08634e-09	2
TRHDE	-0.47868	7.526e-18	2
TRDN	-0.80839	1.64092e-12	2
TRAF7	0.712166	1.79009e-20	2
TPSAB1	-1.04583	1.02689e-10	2
TP63	-2.446	3.6084e-34	2
TP53BP2	1.04611	2.36789e-21	2
TP53BP1	-0.414777	2.66851e-09	2
TOR1AIP2	0.459036	3.36777e-19	2
TOP3B	0.0205816	0.00780872	2
TOMM40L	0.757693	2.38651e-26	2
TNRC6A	-0.486582	2.67109e-15	2
TNRC18	0.169018	0.0424356	2
TNN	-1.5168	2.96781e-37	2
TNKS2	-0.609238	1.31139e-15	2
TMEM68	0.237775	0.00046475	2
TMEM57	0.184764	0.00014623	2
TMEM255A	-1.45508	1.90686e-48	2
TMEM209	0.294865	3.74637e-05	2
TMEM145	0.293392	1.13939e-05	2
TMEM115	-0.151091	0.0178797	2
TMEM107	-0.146706	0.00462046	2
TMEM104	0.737773	4.70411e-27	2
TMCO4	-0.312567	0.000296932	2
TLR3	-1.14978	1.73849e-44	2
TLE4	-0.581697	2.34692e-13	2
TJAP1	0.246166	4.17021e-05	2
TIMM50	0.672289	2.01207e-22	2
TIGD3	0.330923	4.51201e-14	2
THSD7B	-0.744248	3.49954e-38	2
THOC5	0.384135	8.10873e-11	2
THNSL1	0.419367	2.23346e-07	2
THAP7	0.306489	4.52124e-05	2
THADA	0.126877	0.0172312	2
TGM1	0.247698	0.00102546	2
TFPI2	-1.83126	1.62062e-20	2
TFAP4	0.621266	8.12539e-22	2
TFAP2E	0.357541	2.09507e-07	2
TET3	0.936442	2.48306e-23	2
TEPP	-0.329346	7.22067e-17	2
TENM3	-0.897821	1.40828e-18	2
TELO2	0.655985	1.0792e-12	2
TEKT5	0.100054	0.0265772	2
TECPR2	-0.637856	1.03095e-23	2
TECPR1	0.176833	0.0027758	2
TDRD10	-0.755426	4.3076e-38	2
TCTN1	-0.439101	6.66262e-12	2
TCF7L2	-0.60865	5.24681e-15	2
TCF12	-0.437695	3.13814e-10	2
TCEA1	0.362378	4.66604e-08	2
TBKBP1	-0.419319	3.64625e-10	2
TBC1D4	-0.853583	5.00479e-20	2
TBC1D2B	-0.693615	1.45487e-15	2
TBC1D20	-0.436095	6.46204e-16	2
TBC1D13	-0.724469	2.60481e-31	2
TAS1R3	0.361159	1.58991e-09	2
TARS	0.85217	2.29044e-28	2
TARBP1	0.760786	5.70971e-14	2
TAPT1-AS1	-0.60632	1.60706e-28	2
TANGO6	-0.443088	4.46484e-22	2
TANC1	-0.374992	1.18917e-07	2
TAF1	-0.473145	1.82328e-11	2
TACC3	2.3062	1.5808e-74	2
TACC2	-0.369535	1.06334e-05	2
SYT16	0.0594496	0.000969795	2
SYNPO2	-2.89008	2.87531e-72	2
SYNJ1	-0.303602	1.9867e-07	2
SYNGR4	0.174322	1.02629e-12	2
SYNCRIP	0.548263	5.48422e-14	2
SYMPK	0.340388	1.78327e-07	2
SYDE2	-0.393733	1.09749e-08	2
SYDE1	-0.474698	3.15109e-09	2
SYBU	-1.61736	7.50722e-51	2
SVOPL	0.150332	0.000581036	2
SVIL	-0.593819	2.34587e-09	2
SUPV3L1	0.358387	4.08557e-10	2
STXBP1	-1.42724	4.95492e-43	2
STX6	0.904447	1.3149e-39	2
STRIP1	-0.154841	0.00181528	2
STK38L	0.424602	0.000280777	2
STK31	0.111552	0.000232433	2
STK11IP	0.398282	1.0097e-08	2
STAU2	0.187865	0.00417652	2
STAT6	-0.739758	4.75269e-18	2
STAT5A	-1.23341	1.6051e-29	2
STAT3	-0.190609	0.00976004	2
STARD9	-0.987674	6.17196e-47	2
STARD7	0.493018	6.47515e-17	2
STAG3	0.196521	0.00916696	2
STAG2	-0.377291	8.36234e-07	2
STAG1	-0.277103	0.00100465	2
STAC2	-1.56498	7.52873e-07	2
SSX2IP	1.08676	4.34448e-29	2
SSH1	-0.124394	0.0221281	2
SRPK2	0.149135	0.0289373	2
SRPK1	1.42624	4.62093e-39	2
SRL	-0.450495	6.42727e-09	2
SPTLC1	-0.279797	0.000217427	2
SPTBN2	1.1004	1.95782e-15	2
SPTAN1	-0.408239	1.25054e-09	2
SPRED1	-0.400445	4.70303e-07	2
SPPL2B	0.286453	0.000462261	2
SPNS2	-0.449473	0.000188266	2
SPHKAP	-0.436294	1.0961e-08	2
SPG11	-0.821045	1.65214e-28	2
SPEN	-0.437438	1.06271e-08	2
SPATA17	0.092864	0.00204592	2
SPAG5	2.17377	4.42745e-67	2
SP1	-0.572141	1.81664e-18	2
SOS1	-0.322341	3.08879e-05	2
SORL1	-0.82361	3.50489e-11	2
SNX32	0.13652	0.00343908	2
SNRPN	-0.724289	6.60391e-10	2
SNRPD2	0.685167	3.16698e-16	2
SNN	-0.562918	6.11036e-09	2
SNAP91	0.113399	0.00107757	2
SMYD2	0.73291	6.64975e-23	2
SMYD1	-1.87629	8.37777e-33	2
SMOC2	-1.84558	1.28813e-31	2
SMCR8	-0.381837	5.47965e-06	2
SMARCA2	-0.958489	4.77961e-25	2
SMAD5	-0.769738	8.50495e-27	2
SLIT3	-2.58336	2.37875e-56	2
SLCO5A1	0.421644	1.10912e-11	2
SLCO1C1	-0.257404	1.09044e-19	2
SLC9A4	0.0520327	0.000308631	2
SLC8A1	-0.162386	0.000346003	2
SLC6A8	0.840013	6.80927e-15	2
SLC5A9	-0.20609	9.11486e-08	2
SLC4A8	-0.297113	4.02469e-08	2
SLC4A4	-0.917437	5.37317e-21	2
SLC4A11	0.551702	9.40797e-05	2
SLC45A4	0.431252	3.78981e-10	2
SLC39A12	0.19845	0.000320033	2
SLC38A10	0.213922	0.0185389	2
SLC37A2	0.282655	0.00572086	2
SLC35D1	-0.205868	0.00228349	2
SLC34A1	0.0244154	0.000238745	2
SLC29A4	-0.904969	1.70794e-08	2
SLC28A3	-0.88945	1.39482e-07	2
SLC28A2	-0.0385234	0.00388898	2
SLC26A9	0.413486	4.51097e-07	2
SLC26A5	-0.204406	3.08701e-12	2
SLC25A12	-0.345878	1.06429e-09	2
SLC25A10	0.99767	6.83855e-20	2
SLC23A3	0.0952593	0.00132237	2
SLC1A7	-0.507471	3.70935e-25	2
SLC10A5	0.127029	0.000387684	2
SLC10A3	0.636109	5.97653e-17	2
SKIDA1	-0.0955517	0.000419976	2
SIRPG	0.814352	2.57315e-16	2
SIRPA	-0.403506	0.000139757	2
SIGLEC9	0.410707	8.39281e-09	2
SHROOM2	0.336023	8.28849e-05	2
SHPRH	-0.485453	4.4431e-14	2
SHKBP1	0.831034	5.29595e-21	2
SHCBP1L	0.0165312	0.00217393	2
SH3PXD2B	0.308538	0.000283878	2
SH3GL2	0.303137	1.88967e-05	2
SH3BP1	1.22991	2.07507e-39	2
SH2D2A	1.4111	8.27713e-48	2
SGSM1	-0.589122	2.55726e-26	2
SGMS1	-0.389499	5.92302e-08	2
SGIP1	0.10825	0.0244932	2
SGCD	-0.979325	1.72538e-32	2
SF3B3	0.647616	4.19828e-19	2
SF3A1	-0.205163	0.000415698	2
SETD2	-0.436075	2.32862e-11	2
SERPINB3	0.402023	0.000907641	2
SERPINB1	-0.579316	1.59241e-12	2
2019-09-01	0.289589	0.00320006	2
SENP6	-0.185539	0.00397721	2
SEMA6A	-1.28342	1.85245e-39	2
SEMA4D	0.634373	1.27359e-15	2
SEMA3E	-1.12491	4.06302e-22	2
SEMA3C	-2.5925	2.27842e-44	2
SELL	1.01611	3.85463e-10	2
SEC16A	-0.137601	0.0498146	2
SDK1	-0.550429	2.44037e-12	2
SCRIB	1.16534	5.31762e-24	2
SCN8A	-0.0944471	0.038552	2
SCN3A	-0.626454	1.545e-23	2
SCLY	0.0872656	3.1483e-06	2
SCARB2	-0.534718	2.15786e-15	2
SATB1	-0.633101	2.06442e-13	2
SAP25	0.0574249	0.00234049	2
SAP130	0.302428	3.58279e-07	2
SALL2	-1.01468	2.0979e-18	2
SALL1	-0.101817	0.0272955	2
RXRG	-0.643474	6.26475e-20	2
RUFY3	-0.228658	0.00027957	2
RUFY2	-0.484902	1.75256e-18	2
RTN4RL2	0.69563	2.63575e-13	2
RTN4	-0.767409	2.96861e-24	2
RSPH10B	0.0104214	0.00539792	2
RPGRIP1L	0.166474	0.000275729	2
ROS1	0.162946	6.72679e-05	2
RNPC3	-0.561616	6.79073e-17	2
RNF43	-0.439898	0.00062308	2
RNF40	0.267589	0.00188648	2
RNF26	0.203723	0.00355757	2
RNF214	-0.213548	3.76399e-05	2
RNF146	-0.353316	3.96529e-10	2
RNF13	-0.395569	1.03471e-09	2
RNF130	-0.156112	0.0143282	2
RNASE7	-0.925323	1.55017e-20	2
RIPK2	1.34461	4.44113e-40	2
RIN3	0.325844	1.92104e-07	2
RIMS2	0.300325	1.11672e-06	2
RHOBTB2	-0.528689	6.64501e-14	2
RHBG	0.13683	1.22961e-06	2
RGSL1	0.00877625	0.00564766	2
RGS3	-0.32893	1.17477e-05	2
RGAG1	-0.0624041	2.8105e-07	2
RFWD2	0.658038	2.29841e-27	2
REV3L	-0.64961	4.15808e-13	2
RET	-0.24546	0.0359542	2
RDH5	-1.90796	2.8672e-37	2
RDH11	0.263584	0.000115915	2
RCOR3	-0.33025	1.15781e-06	2
RCC1	1.53298	1.37749e-41	2
RBM6	-0.429737	6.97163e-11	2
RBM4B	0.190726	0.00028215	2
RBM47	-0.33688	0.00540643	2
RBM27	-0.195737	0.000174369	2
RBM23	-0.162165	0.00751788	2
RBM17	0.662039	1.09531e-20	2
RBBP8	-0.370171	0.00351413	2
RB1	-0.834437	1.69314e-18	2
RASSF5	0.22857	0.0297479	2
RASIP1	-1.12103	4.74134e-23	2
RASGRF1	0.551935	1.34911e-12	2
RAPGEF6	-0.174142	1.06703e-05	2
RANBP3	0.272255	1.50207e-07	2
RANBP2	-0.234718	0.00197171	2
RAD51AP2	0.0497241	0.000336628	2
RAD21L1	0.0495597	0.002252	2
RABGGTB	0.351369	1.28643e-07	2
RAB1A	0.356334	1.43047e-11	2
RAB14	-0.444948	3.54249e-11	2
QSER1	0.330331	0.000423021	2
PXDN	0.445849	0.00270527	2
PVRL3	-0.787602	7.79038e-22	2
PVRL2	0.414907	9.24564e-05	2
PUM1	-0.303778	6.09988e-06	2
PTPRT	-1.37677	1.81356e-30	2
PTPRQ	-0.40471	6.90401e-17	2
PTPRN2	-0.778834	6.89635e-17	2
PTPRE	-0.592832	2.49255e-18	2
PTPRD	0.160043	0.0322214	2
PTK2	0.485449	3.92617e-12	2
PTCHD3	-0.290117	3.71958e-06	2
PTCH1	-0.345802	1.32609e-09	2
PTBP1	0.762059	1.11073e-32	2
PSME4	0.974605	1.98384e-24	2
PSMA5	0.928994	1.38298e-38	2
PSIP1	0.199859	0.0487262	2
PSD2	-0.401417	1.63816e-14	2
PRX	-1.05135	1.53628e-31	2
PRSS27	0.814977	1.467e-18	2
PRR14L	0.218199	0.00157173	2
PRPF8	-0.205787	0.00224644	2
PRPF3	0.811759	7.17409e-23	2
PROZ	0.101025	5.19708e-05	2
PROM1	0.782536	0.00126315	2
PRLHR	-0.00863439	0.0132263	2
PRKG2	-0.31394	8.78466e-11	2
PRKG1	-0.793076	5.16457e-24	2
PRKDC	0.981584	4.86009e-18	2
PRKCB	0.204795	0.017645	2
PRKCA	-0.228896	0.0152501	2
PRKAR2A	-0.353166	2.2198e-07	2
PRG4	-1.41247	1.60886e-10	2
PRELP	-1.99428	3.97373e-20	2
PRDM1	0.298697	0.00106233	2
PRDM10	-0.202737	4.66081e-05	2
PPRC1	0.520749	9.76863e-12	2
PPP2R1A	0.426696	4.93364e-13	2
PPP1R9A	-0.177509	0.0422238	2
PPP1R13L	0.271482	0.0340892	2
PPP1R12B	-1.86171	4.52735e-61	2
PPM1L	-0.407577	1.18014e-08	2
PPM1B	-0.194612	0.000222337	2
PPFIBP1	-0.650521	1.7394e-13	2
POU2F2	0.356885	2.79232e-06	2
POSTN	1.05423	1.46739e-09	2
POPDC2	-0.564642	2.78116e-10	2
POLR3D	0.320087	2.23285e-07	2
POLR3A	0.180855	0.00431715	2
POLR2J4	-0.247121	8.95152e-13	2
POLR2A	-0.293406	3.41829e-05	2
POLR1B	0.485377	1.09467e-10	2
POLQ	1.04586	5.1798e-54	2
POLE	0.634151	6.47069e-19	2
POLD1	1.22081	3.089e-34	2
PODN	-1.99507	1.71859e-31	2
PNPLA1	0.0654293	2.71854e-13	2
PMP22	-1.17015	3.83871e-19	2
PM20D1	-0.197747	2.04839e-07	2
PLOD2	0.548636	6.28963e-05	2
PLIN5	-1.34848	1.60232e-33	2
PLEKHH2	-1.21492	1.74924e-35	2
PLEKHG4B	0.878017	3.71634e-15	2
PLEKHA5	-0.282737	0.000452335	2
PLD1	-0.449225	1.38837e-10	2
PLCL2	-0.592347	2.77987e-11	2
PLCD4	-0.431421	3.50712e-16	2
PJA2	-1.33169	7.45614e-46	2
PIWIL2	-0.411198	8.20074e-15	2
PIP5K1A	0.639929	1.01285e-16	2
PINK1	-0.890371	2.32781e-29	2
PIKFYVE	-0.582932	3.55369e-13	2
PIK3R1	-1.74883	6.96904e-39	2
PIGM	0.395929	8.00787e-09	2
PI4KA	-0.15252	0.0269498	2
PI16	-3.72603	1.37786e-45	2
PHYKPL	-0.7247	7.61808e-26	2
PHRF1	0.163651	0.0439596	2
PHLDB3	0.192123	0.0248789	2
PHLDB2	-1.40267	1.84074e-32	2
PHEX	0.270011	0.000455943	2
PHACTR4	0.155435	0.0385685	2
PGS1	0.27364	1.46529e-05	2
PGAP2	0.30225	9.14556e-05	2
PFKP	1.37186	7.9044e-24	2
PEX1	-0.282402	2.15109e-06	2
PEAK1	-0.661735	4.28426e-20	2
PDZRN4	-0.553895	7.06059e-25	2
PDZD7	0.157848	3.75454e-05	2
PDZD4	-0.664623	4.84876e-10	2
PDXDC1	0.42979	1.95211e-09	2
PDPR	-0.451852	1.35131e-07	2
PDGFRA	-1.31862	1.5289e-25	2
PDE6C	-0.0588107	0.000247918	2
PDE3B	-1.5614	4.36249e-20	2
PCSK7	-0.433619	4.21303e-15	2
PCSK5	-0.991281	8.71925e-31	2
PCNX	-1.01909	2.19293e-40	2
PCNT	0.407268	2.52633e-09	2
PCF11	-0.546503	1.46666e-16	2
PCDHGB7	-1.22276	2.99142e-62	2
PCDHGB1	0.188723	0.00061033	2
PCDHGA7	-0.249873	2.08647e-17	2
PCDHGA4	-0.398821	5.16681e-21	2
PCDHB7	-0.567946	1.55645e-09	2
PCDHB14	-0.371668	2.38301e-07	2
PCDHB11	-0.455211	2.14738e-12	2
PCDH1	-0.493156	1.12661e-07	2
PC	-0.883984	2.54713e-11	2
PAX7	0.185542	0.0047741	2
PAX5	0.404097	1.85303e-06	2
PARP8	-0.525272	1.10284e-11	2
PARP15	0.147844	0.0463129	2
PAQR8	0.335099	0.000132959	2
PANX2	1.19939	2.4948e-22	2
PAN2	-0.743957	3.15413e-22	2
PADI2	1.24399	9.46153e-08	2
PABPN1L	-0.0118129	0.031286	2
PABPC4	0.501142	1.33101e-15	2
PABPC3	0.194629	2.87251e-08	2
PABPC1	0.953568	2.86451e-22	2
P2RY2	-0.264706	0.0192458	2
P2RX2	0.209201	0.00742452	2
OTUD7B	-0.169084	0.00517777	2
OR10Q1	0.0304706	0.0441994	2
OR10H1	-0.0254159	0.00150443	2
OGFOD1	0.246173	3.82078e-08	2
OCSTAMP	0.0672841	0.0192813	2
NVL	0.769228	1.5358e-25	2
NUPL2	0.361402	2.28532e-09	2
NUP210L	0.0493715	0.0144764	2
NUP205	0.799265	2.6291e-20	2
NUP160	0.415495	9.49053e-07	2
NUMA1	-0.610635	1.88379e-15	2
NUF2	2.83245	1.09752e-78	2
NTRK3	-0.36964	1.256e-06	2
NTNG2	0.113891	2.24654e-11	2
NTMT1	0.630658	3.51461e-18	2
NT5DC3	-0.230918	0.00277677	2
NRXN3	-0.187854	9.00221e-12	2
NRROS	-0.200583	0.0235185	2
NRK	-0.285084	4.67873e-06	2
NRBP1	0.463076	6.34487e-19	2
NPR3	-0.621909	0.00141823	2
NPL	0.526523	7.71819e-09	2
NPAT	-0.161853	0.030431	2
NPAS4	-0.100226	2.58065e-09	2
NPAS2	0.419407	2.40397e-05	2
NOTCH4	-1.42318	1.089e-47	2
NOP56	0.963447	6.63328e-36	2
NOP2	1.37291	2.39055e-39	2
NOMO1	0.579076	6.7584e-18	2
NLRP5	-0.283391	3.21092e-11	2
NLRC5	0.659708	9.03656e-11	2
NLGN3	-0.357888	3.81984e-12	2
NKX2-5	0.936273	6.748e-15	2
NISCH	-0.913104	1.44999e-30	2
NHSL2	-0.748774	1.96237e-27	2
NFKB2	0.829093	6.94579e-17	2
NFATC4	-0.43012	3.13229e-06	2
NFASC	-0.542767	6.42099e-06	2
NEXN	-1.28442	1.70237e-35	2
NET1	0.50404	3.61167e-06	2
NEK4	-0.185833	0.0023108	2
NEDD9	-1.40469	5.50483e-30	2
NDUFS2	0.737979	1.09846e-26	2
NDRG1	0.503226	0.00117082	2
NCOA1	-0.700568	1.31974e-19	2
NCL	0.640303	1.02398e-22	2
NCCRP1	1.42632	1.20088e-11	2
NCAPH2	0.717133	8.13521e-17	2
NCAPD3	0.647647	1.15877e-16	2
NAP1L2	-1.34572	1.84583e-42	2
NANOS3	0.289879	1.03564e-07	2
NAALAD2	-0.72547	8.79831e-27	2
NAA15	0.458886	4.04611e-11	2
MYO9B	0.620864	4.96342e-18	2
MYO7B	-0.0983966	0.0272401	2
MYO5C	-1.00164	5.09197e-23	2
MYO5B	0.512138	0.000632961	2
MYO3A	0.165821	0.00300988	2
MYO1F	0.371525	4.44852e-05	2
MYLK	-2.05326	1.83467e-32	2
MYLK2	0.146086	0.0433988	2
MYH15	0.0543359	0.0014734	2
MYCBPAP	-0.0658467	8.07216e-05	2
MYCBP2	-1.15701	1.13662e-28	2
MYBL2	4.05478	3.98233e-81	2
MX2	0.608369	8.88893e-10	2
MX1	1.14946	1.89527e-11	2
MUC7	-0.304765	0.0212659	2
MTR	-0.272659	0.000178808	2
MT-ND6	-1.08473	1.61111e-11	2
MTMR4	0.259487	0.000961471	2
MTMR3	-0.424689	4.9235e-29	2
MTMR14	0.151971	0.000681102	2
MTM1	-0.268093	0.000309412	2
MTIF2	0.473398	1.30525e-14	2
MSL3	0.510489	3.64936e-20	2
MSH6	0.839256	2.67578e-23	2
MRVI1	-1.23311	3.02202e-38	2
MRPS2	0.27827	0.000132171	2
MRPL45P2	-0.298626	7.68626e-10	2
MPP7	-1.27242	2.83194e-27	2
MPHOSPH9	0.318931	5.11634e-08	2
MPDZ	-1.14324	4.80321e-28	2
MN1	-0.438954	7.49433e-06	2
MMS22L	0.485778	4.3721e-16	2
MMP21	-0.0465851	2.05424e-06	2
MMD	-1.89877	8.46423e-25	2
MLYCD	-0.473472	2.42667e-30	2
MLLT4	-0.247455	0.0308263	2
MLC1	0.611165	5.35072e-05	2
MKI67	2.96071	9.1766e-68	2
MIPEP	-0.202866	0.00369727	2
MID2	-0.687218	1.33558e-18	2
MICALL1	0.653483	9.73954e-12	2
MICAL2	0.716222	1.16158e-16	2
MICAL1	0.58158	6.22337e-10	2
MGAT5B	0.325981	3.14572e-07	2
MGAM	-0.0992959	0.00343723	2
MFSD4	-0.292635	0.00578028	2
MFSD3	1.06644	5.46803e-20	2
MFN1	0.218063	0.00231626	2
MED15	0.252206	4.78915e-07	2
MED13	-0.262261	0.00184556	2
MED1	-0.240468	0.00264031	2
MDGA2	0.115018	1.68292e-12	2
MDGA1	-0.101571	0.0182605	2
MCM3	1.33431	3.46682e-40	2
MCM2	2.15465	2.06648e-51	2
MBOAT7	0.848589	7.46752e-22	2
MBNL3	-0.398808	1.38435e-07	2
MASP2	-0.459778	3.38925e-23	2
MARS	0.81413	5.34396e-36	2
MAPKBP1	-0.734109	1.79752e-25	2
MAPK8IP2	0.802442	3.81308e-10	2
MAPK4	0.440233	6.60762e-06	2
MAP4K1	0.800035	4.40283e-15	2
MAP3K5	-0.677974	4.67155e-14	2
MAP10	0.296771	5.84146e-06	2
MAN2C1	-0.638639	6.07664e-17	2
MAN2A2	-0.645084	1.26154e-13	2
MALSU1	0.380823	5.21859e-12	2
MALRD1	-0.113471	1.49768e-19	2
MAGEE1	-0.316594	2.50009e-06	2
MAGED1	1.16072	7.07573e-31	2
MAGEB4	0.351025	2.02757e-07	2
MAGEA12	0.5033	0.00029676	2
MAGEA11	0.152749	0.00943986	2
MAATS1	-0.57657	1.07331e-16	2
LUZP1	-0.55582	1.52394e-14	2
LTBP1	0.493037	5.90547e-06	2
LSR	2.10406	3.28729e-36	2
LRRN2	0.435113	0.00032242	2
LRRIQ1	-0.123208	2.12454e-06	2
LRRFIP1	-0.367422	5.00974e-08	2
LRRCC1	0.738017	1.28381e-14	2
LRRC4C	-0.51418	3.45435e-10	2
LRRC4B	-0.21307	0.000694237	2
LRRC48	-0.610195	8.05981e-19	2
LRRC27	-0.145917	0.000567784	2
LRP8	1.31574	1.2646e-47	2
LRP5	-0.441615	6.465e-06	2
LRIG1	-1.73923	7.37032e-51	2
LRFN2	0.0665303	0.0207934	2
LRBA	-0.560129	2.86659e-09	2
LPIN3	-0.530626	1.50802e-08	2
LPCAT4	-0.327124	1.22631e-06	2
LOXL3	0.382305	3.20175e-08	2
LNX1	-0.505232	2.719e-10	2
LMOD1	-3.2601	9.47416e-72	2
LMAN1	0.218896	0.00701234	2
LIMK2	0.258073	0.0215107	2
LIMCH1	-1.33114	1.77935e-25	2
LILRB5	-0.985872	4.19731e-16	2
LILRB3	0.138055	0.0042517	2
LILRA4	0.263909	0.00242564	2
LILRA2	-0.125095	0.000850471	2
LGR6	-0.601295	0.00474272	2
LGALS3BP	0.304764	0.0419049	2
LGALS12	-3.02764	6.75908e-37	2
LETMD1	-1.07181	9.50445e-47	2
LEPR	-2.20872	9.0374e-62	2
LEMD2	0.674826	7.27333e-25	2
LCMT2	-0.276979	2.34985e-12	2
LCA5L	-0.0750507	0.0364878	2
LCA5	-1.12904	6.73666e-46	2
LARP7	-0.203842	7.82928e-05	2
LARP4B	0.673429	2.99437e-23	2
LARGE	-0.369984	2.365e-06	2
LAMC2	-0.557986	0.0181168	2
LAMC1	-0.880546	2.16604e-17	2
LAMA5	-0.234437	0.0394921	2
LAMA4	-1.25732	3.92136e-18	2
L3MBTL1	-0.336489	1.0905e-12	2
KRT85	0.11109	0.0031097	2
KRT14	-2.5862	1.21867e-10	2
KNSTRN	1.37922	2.09227e-48	2
KMT2E	-0.533022	2.66261e-10	2
KMT2B	0.541842	2.01113e-12	2
KMT2A	-0.67351	4.51169e-15	2
KLHL38	0.670119	2.44987e-09	2
KLHL31	-1.4239	5.01205e-27	2
KLHL26	-0.207517	4.02669e-05	2
KLHDC3	0.717318	5.77863e-20	2
KLC2	0.746537	1.89438e-21	2
KIRREL2	0.296392	3.08212e-07	2
KIRREL	-0.972831	8.59112e-19	2
KIF26A	-0.735349	1.25408e-18	2
KIF15	1.79452	5.9736e-62	2
KIDINS220	-0.513315	1.49638e-11	2
KIAA2026	-0.367445	3.63931e-06	2
KIAA2018	-0.490449	4.3064e-12	2
KIAA1755	0.395504	0.000437554	2
KIAA1683	-1.10512	1.80453e-39	2
KIAA1328	-0.371939	3.03774e-20	2
KIAA1324L	-0.959255	1.26364e-25	2
KIAA1257	0.0611728	0.0185431	2
KIAA1211L	-0.400144	1.0897e-05	2
KIAA1211	0.577231	1.97647e-14	2
KIAA1191	-0.273691	3.03233e-06	2
KIAA0368	-0.353166	7.3096e-09	2
KIAA0226	0.300541	2.40552e-07	2
KHSRP	0.817835	2.18829e-28	2
KDM5B	0.755851	1.01922e-16	2
KDM4E	-0.0303957	0.0282624	2
KDM2B	0.579815	2.4883e-20	2
KCTD3	-0.498608	6.71632e-08	2
KCNN3	-0.128452	0.00514641	2
KCNH3	-0.289807	1.89833e-07	2
KCNG1	1.28357	1.53509e-23	2
KCND2	-0.517511	4.9017e-11	2
KCND1	-0.114262	0.00967428	2
KCNA5	-0.155903	0.0417397	2
KBTBD6	-0.378208	1.86537e-06	2
KATNAL1	-0.766386	2.63269e-30	2
KAT8	-0.156751	0.00428294	2
KAT6A	-0.338842	0.000213505	2
JMJD1C	-0.709971	3.11727e-14	2
JAKMIP1	0.463529	1.00532e-18	2
JAG2	-0.400264	2.45039e-05	2
IWS1	0.31207	2.52287e-09	2
ITSN1	-1.22627	9.37784e-30	2
ITPR1	-2.17916	9.36617e-49	2
ITLN2	0.0999973	0.00334415	2
ITIH5	-3.18097	7.19118e-66	2
ITGAM	0.23516	0.0356242	2
ITGA10	-0.288019	0.0238425	2
IQSEC3	-0.540963	4.04714e-19	2
IQSEC1	-0.842607	2.39819e-28	2
IQGAP1	-0.2181	0.0132263	2
IPO4	0.435082	9.99387e-14	2
IPO13	0.542197	4.12024e-21	2
IP6K1	-0.337754	9.9427e-10	2
INTS8	0.882958	1.20024e-35	2
INTS2	-0.134344	0.0373968	2
INPP5A	-0.569209	1.00257e-22	2
INPP4B	-1.50025	6.56976e-35	2
INHA	0.270386	8.75727e-05	2
INCENP	1.25874	5.33685e-39	2
ILF3	0.709562	3.2424e-23	2
ILF2	1.49898	5.2513e-50	2
IL6R	-0.521063	1.58062e-08	2
IL1RAPL2	-0.281811	2.11508e-08	2
IL1RAPL1	-0.0568127	3.58636e-05	2
IL11RA	-1.2469	3.04947e-48	2
IGSF9B	-0.341724	1.22928e-15	2
IGSF9	1.57277	1.00024e-27	2
IGSF8	0.650468	3.03602e-11	2
IGSF3	0.780075	1.79491e-09	2
IGSF21	-0.464026	0.00016466	2
IGKV1D-42	-0.257501	0.0310581	2
IGHE	0.319749	3.746e-05	2
IGDCC4	-0.183323	0.00396454	2
IGDCC3	-0.374939	1.63109e-14	2
IFT140	-0.295892	7.6835e-05	2
IFNL1	0.231164	2.16621e-07	2
IFNAR2	0.393093	4.2857e-09	2
IFI44	1.0896	5.61483e-13	2
IDI1	0.386909	0.00103884	2
IARS2	0.148945	0.0363597	2
HTATSF1	0.399649	1.87446e-08	2
HSPBAP1	0.15802	6.43155e-05	2
HSPA4	0.16513	0.00222026	2
HSP90AB1	0.707404	2.56531e-21	2
HSD3B1	-0.0540595	0.0103027	2
HSD17B7	0.513973	1.10032e-15	2
HRAS	0.650394	8.8928e-09	2
HPSE	0.576272	3.03374e-15	2
HOXD13	0.441372	9.26308e-06	2
HOXB3	-0.71346	1.40526e-12	2
HOXB13	0.932037	2.86008e-15	2
HOXA7	-0.970476	3.51597e-31	2
HOOK2	-0.522128	2.77115e-10	2
HOOK1	0.394686	0.00266795	2
HOMEZ	-0.184818	0.00298746	2
HOMER2	-0.36736	0.00183139	2
HNRNPH2	-0.389548	3.50784e-11	2
HMHA1	0.378688	0.000572523	2
HMBS	0.829735	1.02092e-29	2
HLF	-2.34433	1.89283e-65	2
HLA-F	1.05612	5.29346e-13	2
HLA-DRB1	0.650086	4.92504e-05	2
HLA-A	1.06372	2.71986e-17	2
HKR1	-0.208448	0.00800092	2
HIVEP3	-0.307575	1.34304e-06	2
HIST1H2BC	1.03892	6.39614e-13	2
HIPK2	-0.803071	7.2555e-15	2
HILPDA	0.736109	2.59373e-09	2
HELQ	-0.529808	1.05765e-28	2
HECTD4	-0.492468	4.72911e-14	2
HCP5	0.407206	0.00157254	2
HCAR3	-0.568326	3.85781e-36	2
HCAR2	-1.89287	1.18487e-33	2
HBP1	-0.912194	2.31043e-30	2
GYS2	-0.535422	1.38866e-10	2
GUCY2D	-0.0993666	8.08292e-05	2
GTF3C2	0.649417	7.85125e-23	2
GTF3C1	0.393694	6.23255e-12	2
GTF2IRD2	-0.398892	2.00613e-31	2
GSPT2	-0.863542	2.95589e-18	2
GSE1	-0.600136	3.64195e-13	2
GRM8	0.110994	1.22035e-06	2
GRIK3	-1.16333	6.23329e-19	2
GRIA1	-0.416802	2.06537e-24	2
GRHL2	0.862122	5.07715e-08	2
GPSM2	1.41795	2.28756e-42	2
GPR55	0.29141	9.04828e-06	2
GPR133	-0.826469	1.57332e-28	2
GPR116	-1.8936	3.25394e-45	2
GPR111	0.0393869	1.31231e-05	2
GPR108	-0.205939	0.00199676	2
GPI	0.937649	9.23469e-24	2
GPC2	0.977375	1.32747e-22	2
GPATCH4	0.867208	5.29393e-24	2
GPATCH2	0.283236	5.30585e-06	2
GPATCH1	0.177462	0.00248682	2
GOLGA4	-0.311812	0.000700779	2
GOLGA3	0.255084	1.49217e-06	2
GNPAT	0.441462	2.31978e-14	2
GNL2	0.80275	1.67839e-28	2
GNE	-0.705039	1.91809e-10	2
GMEB1	0.153909	0.00377885	2
GLUL	-0.918748	5.2196e-17	2
GLDC	0.782523	8.28227e-11	2
GIMAP8	-1.602	1.85397e-39	2
GHRHR	0.120307	0.00747929	2
GFRAL	-0.0424573	2.21071e-09	2
GFI1	0.274853	1.68582e-06	2
GDPD5	-0.570051	1.59747e-07	2
GDI1	0.417228	7.46816e-12	2
GDF3	-0.0647476	0.000497083	2
GDAP1	-0.31958	0.000767415	2
GCGR	0.0251681	5.16897e-05	2
GCAT	0.889448	2.00706e-16	2
GATM	-1.09679	2.52591e-28	2
GAS2L3	1.08157	6.44014e-41	2
GAREML	0.456553	9.62647e-08	2
GALNT5	-0.212165	0.0131342	2
GABRG1	-0.0373719	3.23358e-09	2
GAA	0.594014	2.50533e-08	2
FYB	0.44428	0.000250435	2
FXR1	0.192488	0.000840471	2
FSIP1	-0.669939	2.40339e-18	2
FRY	-1.29491	2.47149e-59	2
FRMPD1	-0.264789	5.23078e-17	2
FRG1B	-0.65191	9.05333e-10	2
FOXM1	3.41133	3.63764e-74	2
FNDC7	0.0379649	0.0263148	2
FN3KRP	0.371958	1.71339e-06	2
FN1	2.40419	4.4051e-33	2
FMO4	-0.560811	3.44709e-11	2
FMO1	-0.551988	7.55347e-06	2
FMNL1	0.386694	3.38703e-05	2
FMN1	-0.461801	2.67589e-12	2
FLVCR1	0.942298	3.83021e-29	2
FLNB	-0.239544	0.0390462	2
FKBPL	1.02496	2.35878e-34	2
FIG4	-0.122917	0.0478813	2
FHL3	0.485588	2.76626e-06	2
FGD1	0.93159	2.74192e-20	2
FER	-0.784353	3.40942e-35	2
FCRL5	0.318847	9.60304e-05	2
FCGRT	-1.12357	4.97329e-24	2
FCGR1A	0.906684	3.19004e-23	2
FBXW10	0.0691607	0.000177848	2
FBXO18	0.257571	5.03563e-05	2
FBXO11	-0.228227	0.00103428	2
FBXL7	-1.15674	2.64296e-26	2
FBXL18	0.175769	0.00109678	2
FBXL13	0.278638	0.000947032	2
FBN3	0.80788	1.53374e-14	2
FBN1	-1.06204	3.12305e-09	2
FAT4	-1.10864	1.81514e-34	2
FAT2	-1.13747	1.55632e-17	2
FASTKD1	0.342841	1.90636e-08	2
FASN	-0.906661	2.60557e-07	2
FARSB	0.598113	3.15099e-22	2
FANCM	-0.204899	8.85211e-06	2
FANCG	0.928777	1.31195e-28	2
FANCF	0.536675	1.10183e-10	2
FANCB	0.614498	4.42219e-34	2
FAM83A	0.560292	5.902e-06	2
FAM73B	-0.192932	0.00122751	2
FAM65A	-0.518587	8.38293e-14	2
FAM46D	0.0272447	0.00181249	2
FAM208B	0.839371	8.23046e-14	2
FAM208A	-0.447487	5.02938e-11	2
FAM205A	-0.0162053	0.00114345	2
FAM193B	-0.264729	0.000928688	2
FAM179B	-0.745798	3.63532e-27	2
FAM173B	-0.153818	0.0123713	2
FAM13C	-1.00225	2.02884e-61	2
FAM138B	-0.0194487	1.30747e-06	2
FAM129C	0.252597	0.000169734	2
FAM124A	-0.245262	0.000349524	2
FAM122B	0.182685	0.0125597	2
FAM115A	-0.432573	2.78409e-11	2
FAAH	-0.336278	0.00106813	2
F8	-1.44546	8.81456e-50	2
F10	-1.66681	1.82362e-43	2
EZH2	2.29147	2.74354e-68	2
EXT1	0.270137	2.32839e-05	2
EXOC6	-0.444035	1.89345e-12	2
EXOC1	-0.409468	2.22362e-11	2
EVPL	1.18755	6.4925e-18	2
EVC2	-0.485466	1.36344e-12	2
ETV6	0.519308	1.93614e-05	2
ETV1	-0.834104	1.47353e-15	2
ETS2	-0.915533	3.73155e-22	2
ESRRG	-0.225057	0.0037351	2
ESRP1	1.92373	5.48264e-25	2
ESPL1	1.54779	6.93548e-58	2
ESAM	-1.32188	4.10374e-29	2
ERVW-1	-0.0426357	0.00688197	2
EPPK1	0.368579	0.00169891	2
EPHB4	0.51357	2.28448e-08	2
EPHB2	0.787193	3.11122e-18	2
EPC1	-0.295201	1.81518e-06	2
ENPP7	0.00804151	0.0393239	2
ENAH	0.754507	8.69219e-16	2
EMR2	0.290561	2.47303e-06	2
EMR1	0.2723	5.8521e-06	2
ELN	-0.660283	0.00657218	2
ELL2	-0.771941	4.81518e-18	2
ELK1	0.728605	5.71459e-30	2
ELF2	-0.372736	7.95045e-12	2
EIF4A1	-0.310546	3.6665e-07	2
EIF3I	0.3156	7.94987e-07	2
EIF3A	-0.211459	0.008459	2
EIF2D	-0.220945	0.000986986	2
EHD1	0.511746	3.34777e-11	2
EGR1	-3.16535	2.3362e-45	2
EEF1A1	-0.604536	4.73283e-13	2
EEA1	-0.834336	6.66875e-24	2
EDNRB	-2.03054	5.38285e-53	2
E4F1	0.43094	8.83329e-09	2
DZIP3	-0.484002	2.46536e-19	2
DZIP1L	-0.403248	3.76519e-11	2
DYRK4	0.39455	8.46659e-08	2
DTX2	0.74538	3.20843e-21	2
DTX1	-1.35847	3.09007e-28	2
DSP	0.841923	6.65749e-05	2
DSEL	-0.968437	2.05227e-40	2
DROSHA	0.237869	0.000145273	2
DPYSL5	0.431314	1.99222e-05	2
DPP6	-0.240979	2.94901e-10	2
DPH2	0.989276	1.91214e-32	2
DOT1L	0.511278	6.68994e-16	2
DOCK6	-0.623385	7.04945e-18	2
DOCK2	0.235859	0.0111461	2
DNTTIP2	0.196833	0.000550659	2
DNMBP	-1.19232	1.78013e-40	2
DNAJC5B	0.282289	1.24527e-08	2
DNAI1	-0.102184	0.0112899	2
DLGAP5	2.67799	5.43592e-77	2
DLGAP4	0.468087	8.53272e-16	2
DLGAP1	0.332399	0.000183315	2
DLG2	-0.269431	4.39963e-15	2
DKK3	-1.8291	1.12055e-30	2
DKC1	1.24566	5.81818e-38	2
DIAPH3	1.37658	2.5357e-49	2
DHX34	0.755812	1.18205e-22	2
DGKH	-0.159773	0.00820193	2
DGCR14	0.419135	3.01634e-14	2
DEPDC5	0.0970275	0.0379826	2
DENND4C	-1.04666	3.014e-25	2
DENND1A	0.0977553	0.0323383	2
DDX50	-0.210133	0.000178431	2
DDX47	-0.099395	0.00478211	2
DDX42	-0.166269	0.00177447	2
DDX3X	-0.605573	9.03335e-18	2
DDX39A	1.75511	4.37982e-58	2
DDB1	0.225383	2.93666e-05	2
DCST2	-0.1459	0.0205898	2
DCAF13	1.30859	3.26315e-50	2
DAAM2	-1.35555	1.32784e-29	2
DAAM1	-0.725693	1.79337e-18	2
CYTIP	0.48632	3.94088e-05	2
CYTH3	-0.537368	2.41818e-12	2
CYSLTR1	-0.475446	1.0819e-12	2
CYP3A5	-0.258322	2.2078e-14	2
CYP3A4	-0.135958	5.23894e-18	2
CYP2W1	0.094293	0.0226918	2
CYP2S1	0.458425	9.392e-09	2
CYP2D6	0.10482	0.0184259	2
CYLD	-0.174841	0.00808197	2
CYB5R1	-0.312006	5.33691e-06	2
CUL5	-0.308557	4.49909e-06	2
CUL2	0.352073	2.66924e-09	2
CTTNBP2	-1.0265	6.63328e-36	2
CTR9	-0.36104	4.43746e-09	2
CTNNBL1	0.306013	5.83222e-09	2
CTNNA3	-0.131619	1.09603e-05	2
CTNNA2	0.109833	0.0345569	2
CSNK1E	0.187439	0.00272531	2
CRY2	-1.71655	5.86716e-73	2
CRTC1	-0.174908	0.00308012	2
CRIPAK	-0.550959	5.69707e-15	2
CRIP1	-0.0873952	1.55512e-07	2
CRELD1	-0.321071	7.34919e-06	2
CRAT	-0.871012	1.76212e-10	2
CPXM2	-1.27047	1.23731e-16	2
CPSF2	0.249821	3.13389e-06	2
CPED1	-2.2144	1.08232e-44	2
CPA1	-0.682231	1.94523e-35	2
CP	0.822321	0.00089025	2
COX15	-0.451844	3.59298e-21	2
COPG1	0.842726	5.59369e-31	2
COL9A1	0.577207	8.0881e-06	2
COL5A2	1.01567	6.55591e-11	2
COL3A1	0.775662	6.44958e-05	2
COL27A1	0.572829	3.79621e-06	2
COL25A1	-0.486806	1.80117e-13	2
COL22A1	1.29201	3.6425e-20	2
COL21A1	-0.272979	8.29573e-06	2
COL16A1	-0.338754	0.0184962	2
COL12A1	0.451386	0.00310632	2
COG3	-0.461277	1.45673e-10	2
CNTN3	-0.605238	4.96007e-17	2
CNOT3	0.581887	1.59242e-23	2
CNKSR2	-0.204996	0.000545791	2
CNBD2	0.0332515	0.00795208	2
CMTR2	-0.212789	0.00360881	2
CLUAP1	-0.194018	7.00383e-05	2
CLTC	0.195349	0.00636956	2
CLSTN3	0.734921	1.18409e-10	2
CLSTN2	-2.63893	8.87665e-51	2
CLOCK	-0.208932	0.00278094	2
CLIP1	-0.438299	3.50504e-11	2
CLDN18	-0.076551	3.6566e-06	2
CLDN10	0.339166	0.0321274	2
CLCNKA	-0.190436	1.37749e-14	2
CLCN6	-0.909839	1.33574e-42	2
CLCN3	-0.52534	1.6187e-10	2
CLCA2	-0.993576	2.6983e-05	2
CLASP1	-0.233078	3.89997e-05	2
CIT	1.26489	1.1083e-52	2
CILP	-1.29219	4.23986e-09	2
CIITA	0.291728	0.00805902	2
CHST15	-0.37781	9.33842e-05	2
CHRM3	0.669043	1.12346e-10	2
CHORDC1	0.525439	2.77943e-15	2
CHM	-0.516797	1.04636e-15	2
CHD7	0.648305	8.03623e-15	2
CHD5	0.0788945	0.00274313	2
CHD4	0.445985	2.02602e-12	2
CEP85	0.863005	2.83018e-22	2
CEP41	0.124741	0.00877835	2
CEP290	-0.415272	3.50622e-12	2
CEP250	0.582644	1.2575e-17	2
CEP152	0.143871	0.000310415	2
CENPF	3.11567	2.18894e-73	2
CELSR1	-0.340316	0.0172692	2
CELF4	0.369819	6.03274e-10	2
CDRT1	0.0249828	0.000559752	2
CDR2	0.509295	1.67583e-13	2
CDK5RAP2	-0.173604	0.00682807	2
CDK5RAP1	0.300472	6.5896e-08	2
CDHR2	0.137359	5.21754e-14	2
CDHR1	0.112574	0.000981723	2
CDH10	-0.0378965	0.0273881	2
CCS	0.376623	6.69775e-05	2
CCNT1	-0.426773	8.05252e-10	2
CCNE2	1.22592	1.37332e-31	2
CCNB3	0.166644	0.00135069	2
CCDC40	-0.187913	6.14164e-05	2
CCDC3	-2.00195	3.78283e-26	2
CCDC27	-0.0444297	6.41208e-05	2
CCDC178	-0.799307	1.21338e-40	2
CCDC170	-1.789	4.69861e-67	2
CCDC158	-0.797908	7.0276e-59	2
CCDC155	0.0498769	0.00156606	2
CCDC150	0.376115	6.7359e-33	2
CCDC132	-0.297679	2.2969e-08	2
CCDC130	0.24269	0.000824894	2
CCDC120	0.358029	5.16957e-05	2
CCAR1	0.448413	9.88669e-12	2
CBX4	0.789692	8.69023e-18	2
CBLC	0.909476	1.33627e-07	2
CATSPER2	-0.358942	1.00688e-19	2
CASQ2	-1.72062	1.89603e-35	2
CASQ1	-0.409983	5.53653e-05	2
CASK	0.289755	0.000171976	2
CASC5	1.3038	4.34396e-58	2
CARS	0.404565	2.79648e-15	2
CARD8	-0.568654	1.02293e-21	2
CARD6	-0.583434	4.74773e-11	2
CARD14	0.20325	0.00657635	2
CAPN12	0.17236	1.00579e-05	2
CAPN1	0.537888	3.42921e-09	2
CAP1	0.323871	8.58178e-08	2
CAMTA1	0.17524	0.00146844	2
CAMK2D	-0.447713	1.13653e-10	2
CAMK1G	0.16912	7.2321e-07	2
CALB2	-0.809562	0.00293834	2
CADM4	0.712013	2.64046e-06	2
CACNA2D3	-0.13507	0.00149463	2
CACNA2D1	-1.399	3.46038e-36	2
CACNA1I	0.0812145	0.0036335	2
CACHD1	-1.66067	4.348e-47	2
C9orf135	0.0629333	0.0183035	2
C9orf131	-0.0112405	0.0435169	2
C7	-2.38976	3.33094e-30	2
C6orf89	-0.39604	1.54729e-10	2
C6orf183	-0.0916799	0.000357348	2
C5orf60	0.010907	0.0422292	2
C5orf42	-0.277457	4.77446e-05	2
C4orf50	0.0236157	6.60616e-08	2
C3orf62	-0.187587	1.62771e-07	2
C3	-1.0399	9.77767e-08	2
C1QTNF9	-0.878947	5.29887e-52	2
C14orf37	-0.286341	9.3199e-08	2
C11orf49	0.192578	0.00432537	2
C11orf16	0.161066	0.00129507	2
C10orf90	-0.407426	4.44114e-07	2
C10orf2	0.590369	8.50677e-11	2
BUB3	0.620947	1.54222e-13	2
BUB1B	2.32526	2.80192e-72	2
BUB1	2.68026	2.41888e-76	2
BTBD7	-0.575654	8.00107e-19	2
BTBD3	0.383013	1.59021e-05	2
BSN	-0.0712789	0.00690084	2
BSDC1	-0.238563	6.88813e-06	2
BRSK2	0.367972	1.04368e-07	2
BRPF1	0.262287	9.34907e-06	2
BRD9	0.179719	0.00192115	2
BRD4	0.514504	3.0669e-19	2
BRCA2	0.751046	3.86266e-31	2
BPIFB4	0.10369	0.0112473	2
BOD1L1	-0.6701	7.56317e-17	2
BNC2	-0.489695	1.38237e-12	2
BMPR2	-0.659531	9.58034e-15	2
BMP4	-1.63259	3.00464e-46	2
BID	0.655057	7.44688e-22	2
BICC1	-0.904796	2.67436e-21	2
BEND6	0.332833	5.58673e-13	2
BCL9	0.745499	3.6721e-16	2
BCKDHA	-0.143701	0.00473741	2
BCCIP	0.476668	9.07241e-11	2
BCAT1	0.695636	6.80428e-09	2
BCAS1	-0.617066	3.87991e-13	2
BCAR1	0.342305	2.95159e-05	2
BBS9	-0.35846	7.16343e-13	2
BBS2	-0.884862	3.3215e-36	2
BAZ1B	0.449212	5.25307e-12	2
BAX	1.28283	2.88327e-40	2
BAI3	-0.173088	9.97696e-07	2
BAG6	0.548934	2.91557e-20	2
B3GALT5	-0.664062	2.47925e-07	2
AZI2	-0.29688	2.4361e-07	2
AXDND1	0.0323852	0.028827	2
AWAT1	-0.0188663	0.0090802	2
AVPR1B	0.0307391	4.06745e-06	2
ATRN	-0.330535	5.28426e-06	2
ATP8B2	-0.723273	1.2362e-13	2
ATP6V1B1	-0.510784	0.00782594	2
ATP2B1	-0.68369	2.39142e-13	2
ATP1A4	-0.301429	1.01728e-10	2
ATP1A1	0.531266	2.18603e-06	2
ATP13A5	-0.558064	0.000182373	2
ATP11A	0.353222	7.24425e-05	2
ATP10B	0.0934477	0.000158547	2
ATOH8	-1.74176	3.10909e-55	2
ATHL1	-0.325784	0.0326163	2
ASPH	-1.17254	3.92535e-23	2
ASMTL	-0.504533	4.25212e-09	2
ASIC3	0.286712	3.34387e-07	2
ASF1B	2.79812	2.48047e-75	2
ASCC3	0.324373	3.16122e-05	2
ASB1	-0.742023	1.05774e-32	2
ARMCX4	-0.571035	2.08153e-19	2
ARMC9	0.144525	0.0152505	2
ARL11	0.359434	4.36559e-11	2
ARHGEF7	-0.371813	9.13976e-08	2
ARHGAP6	-0.759271	2.5542e-35	2
ARHGAP4	0.487334	1.17454e-05	2
ARHGAP36	-1.26992	7.66511e-14	2
ARHGAP31	-0.674057	4.73705e-14	2
ARHGAP30	0.529027	1.5249e-06	2
ARHGAP29	-1.0354	4.02949e-18	2
ARHGAP21	-0.290479	0.00226539	2
APPBP2	-0.572997	1.0254e-20	2
APOA1	0.056878	0.00233344	2
APMAP	-0.23046	0.00709527	2
APBA2	1.11259	4.69767e-27	2
APBA1	-0.321352	6.37117e-05	2
APAF1	-0.149067	0.0287102	2
AP2A2	-0.1471	0.00352505	2
ANXA13	-0.0402611	0.0273233	2
ANPEP	-1.39831	1.53924e-12	2
ANO9	0.603874	7.63563e-10	2
ANO1	-1.59226	8.2974e-16	2
ANKRD50	-0.203264	0.0245176	2
ANKRD36B	-0.083776	0.0312187	2
ANKRD28	-0.188665	0.00516237	2
ANKRD20A4	-0.0270448	0.000218739	2
ANKRD18A	-0.0254075	0.0255427	2
ANKRD12	-0.619327	6.64319e-14	2
ANKFY1	-0.553252	1.66045e-17	2
ANGPT4	-0.76679	3.75408e-36	2
ANAPC4	-0.350017	4.62163e-12	2
AMPH	-0.454757	1.26979e-06	2
AMOT	-0.389272	0.000169218	2
ALS2CR11	-0.0647735	0.0105605	2
ALS2CL	-0.551264	5.41793e-12	2
ALPP	0.103229	0.000929614	2
ALOX15	-0.305426	0.0155438	2
ALG13	-0.316033	1.6211e-09	2
ALB	-2.25608	3.21904e-21	2
AKTIP	-0.29679	7.62891e-08	2
AKR1C1	-2.07283	2.11413e-29	2
AKAP8	0.153711	0.00549132	2
AKAP6	-0.427218	3.28505e-13	2
AGTR1	-2.33164	3.09281e-67	2
AGPAT9	-0.582196	3.56233e-06	2
AGFG2	-0.609784	5.36868e-20	2
AGAP5	-0.0289964	0.0113935	2
AFG3L1P	0.158994	0.0010006	2
AFF1	-1.29063	6.74312e-41	2
ADAMTSL4	-0.984165	1.39216e-15	2
ADAMTS6	0.117858	3.79898e-05	2
ADAMTS20	0.0467048	0.0266175	2
ADAMTS18	-0.701967	6.62495e-18	2
ADAMTS1	-1.80785	6.88789e-32	2
ADAM33	-2.13497	2.24706e-71	2
ACVR1C	-2.2073	6.90942e-36	2
ACVR1B	-0.442865	1.74005e-10	2
ACTG1	0.77798	2.20918e-20	2
ACSF2	-1.03108	1.22105e-25	2
ACSBG2	-0.102837	1.47745e-12	2
ACOX1	-0.523058	1.72536e-11	2
ACADVL	-0.886317	9.51739e-26	2
ACADSB	-1.98425	2.6195e-44	2
ABHD6	-0.943088	2.28849e-27	2
ABHD2	-0.304116	0.00476246	2
ABHD16A	0.154273	0.000550683	2
ABCG4	0.0159653	0.00339433	2
ABCG1	-0.288297	0.00145195	2
ABCF3	0.475593	4.65536e-14	2
ABCC9	-1.39244	1.20994e-28	2
ABCC5	0.333552	2.32848e-05	2
ABCC1	0.441609	9.63471e-09	2
ABCC11	-1.0363	1.33271e-06	2
ABCB9	0.278091	1.40513e-08	2
ABCB7	-0.330081	4.576e-10	2
AACS	-0.340632	0.000315645	2
MUC16	0.538599	9.79421e-06	11
OBSCN	-0.315064	0.00120865	10
ZZZ3	-0.147292	0.0494624	1
ZZEF1	-0.592662	7.56567e-21	1
ZYG11B	-0.448932	1.55419e-11	1
ZWILCH	1.10598	1.67693e-40	1
ZSWIM3	0.102033	0.0474088	1
ZSWIM1	0.0993629	0.0453609	1
ZSCAN5A	0.0943605	0.00575223	1
ZSCAN32	-0.0798217	0.000571228	1
ZSCAN21	-0.104709	0.0176916	1
ZSCAN12	-0.378151	5.37903e-07	1
ZRSR1	-0.0555959	8.88893e-10	1
ZRANB2	-0.189357	0.00950438	1
ZRANB1	-0.365896	2.2256e-07	1
ZPLD1	0.290322	1.54653e-05	1
ZNF93	0.845689	7.91457e-25	1
ZNF862	-0.386297	1.65381e-08	1
ZNF85	0.151343	0.00815019	1
ZNF846	-0.612875	7.99004e-30	1
ZNF844	-0.909547	8.53306e-24	1
ZNF827	-0.317076	6.83838e-05	1
ZNF814	-0.158871	0.00235343	1
ZNF812	-0.401155	0.000180907	1
ZNF804A	0.101048	0.0126824	1
ZNF80	0.071518	0.00025055	1
ZNF790	-0.111068	0.0355781	1
ZNF786	0.317607	2.77209e-06	1
ZNF782	-0.165441	0.00122561	1
ZNF777	0.490613	2.48104e-13	1
ZNF776	-0.425832	5.15625e-08	1
ZNF774	-0.324625	5.61211e-09	1
ZNF76	0.169016	0.00272781	1
ZNF75A	0.126229	0.0185579	1
ZNF747	-0.0229777	0.000759823	1
ZNF737	-0.545637	8.94355e-08	1
ZNF732	0.249657	2.68662e-06	1
ZNF721	-0.410177	5.17055e-10	1
ZNF714	0.38007	9.23382e-08	1
ZNF710	0.539094	3.45752e-12	1
ZNF708	-0.155619	0.0185616	1
ZNF692	0.685272	6.68084e-11	1
ZNF682	0.19299	0.00098054	1
ZNF681	0.254944	7.78496e-05	1
ZNF680	-0.51189	6.78662e-12	1
ZNF676	-0.693279	1.66646e-32	1
ZNF675	0.2184	0.00020866	1
ZNF671	-0.77501	1.63905e-24	1
ZNF668	0.372617	2.30652e-23	1
ZNF665	-0.25527	3.93272e-13	1
ZNF660	-0.294657	2.69313e-12	1
ZNF655	-0.742352	3.43079e-14	1
ZNF654	-0.418664	2.03104e-09	1
ZNF652	-0.362562	3.48342e-05	1
ZNF641	-0.251701	1.32799e-06	1
ZNF628	0.356928	6.53999e-09	1
ZNF626	-0.344725	0.00015138	1
ZNF624	-0.299805	1.98635e-09	1
ZNF622	0.192551	0.00422173	1
ZNF619	-0.344429	1.78677e-09	1
ZNF608	-0.8637	1.07564e-20	1
ZNF598	1.00011	6.39415e-31	1
ZNF583	-0.184834	3.24028e-10	1
ZNF582	-0.500852	6.30534e-22	1
ZNF575	-0.0861078	0.0131418	1
ZNF573	-0.166913	0.000467022	1
ZNF572	0.254599	0.000241546	1
ZNF568	-0.232659	5.1057e-06	1
ZNF567	0.144566	0.0274897	1
ZNF564	-0.0586622	0.00195812	1
ZNF546	-0.355304	2.97749e-22	1
ZNF544	0.425069	4.52569e-10	1
ZNF543	-0.193623	0.00207853	1
ZNF534	-0.0404632	0.000238985	1
ZNF530	0.135855	0.000827857	1
ZNF528	-0.558839	1.73436e-13	1
ZNF525	0.219728	0.000664559	1
ZNF518A	-0.285304	0.000166303	1
ZNF513	0.406075	2.04947e-07	1
ZNF507	-0.219534	0.00117244	1
ZNF502	-0.695857	7.11763e-20	1
ZNF493	-0.504076	1.1673e-16	1
ZNF487	-0.260702	1.78691e-12	1
ZNF486	-0.599583	5.43819e-08	1
ZNF485	0.423941	7.68354e-11	1
ZNF484	-0.465257	8.33513e-18	1
ZNF48	0.596806	1.83361e-15	1
ZNF480	0.446507	3.43768e-12	1
ZNF473	0.254604	2.45938e-06	1
ZNF470	-0.175292	5.2703e-05	1
ZNF445	-0.3052	1.16936e-06	1
ZNF441	-0.847386	1.41126e-31	1
ZNF429	-0.439481	5.44617e-13	1
ZNF423	-1.10611	5.6346e-43	1
ZNF415	-0.396436	4.27075e-09	1
ZNF41	-0.289395	3.00556e-07	1
ZNF385B	-0.593922	4.89091e-11	1
ZNF341	0.31364	1.55513e-14	1
ZNF33B	-0.447848	5.99087e-06	1
ZNF335	0.176804	0.00187737	1
ZNF333	-0.3796	1.92762e-16	1
ZNF329	-0.462955	1.00723e-10	1
ZNF324	-0.108281	0.0455867	1
ZNF319	-0.136837	0.0118493	1
ZNF311	-0.332246	1.30224e-06	1
[truncated: 14,903 more rows]
