# Supplementary material for: Delineation of the Germline and Somatic Mutation Interaction Landscape in Triple-Negative and Non-Triple-Negative Breast Cancer
Source: Int J Genomics. 2020 Jul 6;2020:2641370. doi: 10.1155/2020/2641370 (PMC7364202; doi:10.1155/2020/2641370)
Supplement: Supplementary Materials — All additional results from the analysis are shown in the supplementary tables described. Supplementary Table SG: GWAS information-genetic variants and genes associated with an increased risk of developing breast cancer. Supplementary Table SM: somatic mutated genes significantly associated with TNBC vs. control and non-TNBC vs. control. Supplementary Table SN: nonsomatic mutated genes significantly associated with TNBC vs. control and non-TNBC vs. control. Supplementary Table S2A1: list of all somatic mutated genes significantly associated with TNBC. Supplementary Table S2A2: list of all somatic mutated genes significantly associated with non-TNBC. Supplementary Table S1: differentially expressed and uniquely somatic mutated genes between TNBC and non-TNBC. Supplementary Table SA3: significantly differentially expressed germline mutated genes with and without somatic mutations in TNBC. Supplementary Table SB3: significantly differentially expressed germline mutated genes with and without somatic mutations in non-TNBC. Supplementary Table S3A: genes containing both germline and somatic mutations significantly associated with TNBC. Supplementary Table S3B: genes containing both germline and somatic mutations significantly associated with non-TNBC. Supplementary Table S3C: a complete list of 251 genes containing both germline and somatic mutations distinguishing TNBC from non-TNBC. [file 2641370.f1.zip › mat.2641370.v2/SN.xlsx]

## Sheet: 07.TNBC.17466.DE.nonSom.comm.ge
Table SN. Non-somatic mutated genes significantly associated with TNBC vs control and non-TNBC vs control.
TNBC						non-TNBC
Gene name	logFC	P.Value	adj.P.Val			Genes	logFC	P.value	adj.P.Val
5S_rRNA	0.246581	4.43262e-07	1.27531e-06			5S_rRNA	0.665953	6.5772e-08	1.63943e-07
7SK	0.110997	0.01132	0.0183523			7SK	-1.18838	1.80988e-12	6.35806e-12
A2M-AS1	-0.524153	9.05306e-24	9.92135e-23			A1BG	0.828539	8.21401e-16	3.59256e-15
A3GALT2	0.0293543	0.0328311	0.0490308			A1BG-AS1	0.569045	5.68563e-12	1.92506e-11
A4GNT	-0.0602584	8.13849e-07	2.27247e-06			A2M-AS1	-1.39887	4.06338e-46	9.13202e-45
AADACL3	-0.0433714	0.0174673	0.0273843			A4GALT	-0.293917	0.0174276	0.0246031
AADAT	0.623064	1.29037e-09	4.70716e-09			AAED1	-0.925439	1.17516e-37	1.68391e-36
AAED1	-0.561648	3.2959e-18	2.38506e-17			AAGAB	0.847812	3.65822e-45	7.79009e-44
AAMDC	-0.529858	6.82435e-11	2.78116e-10			AAMDC	-0.236154	0.0288365	0.0394034
AAMP	0.29598	1.98863e-05	4.75096e-05			AAMP	0.328085	2.71593e-07	6.42391e-07
AANAT	0.101807	5.69556e-12	2.53144e-11			AARD	1.19336	7.72565e-06	1.60214e-05
AARD	1.65451	2.09888e-11	8.93739e-11			ABC7-43041300I9.1	0.501045	0.000194506	0.000349567
AASS	-1.35561	3.64972e-45	1.81738e-43			ABCA17P	0.710025	1.46195e-08	3.83927e-08
ABCA11P	-0.140155	0.000282765	0.000583425			ABCC13	2.84832	3.25901e-13	1.20884e-12
ABCA17P	0.141659	4.41438e-11	1.82846e-10			ABCC6P1	-1.88022	2.96942e-17	1.41856e-16
ABCA2	-0.68369	4.63168e-18	3.31419e-17			ABCC6P2	-0.595784	0.00427185	0.00656173
ABCA9-AS1	-0.041491	9.40906e-05	0.000206627			ABHD14B	-0.666233	1.50568e-17	7.33906e-17
ABCB11	-0.114812	2.94327e-08	9.51253e-08			ABRACL	0.919346	3.92515e-22	2.54168e-21
ABCC3	-0.497721	1.09004e-06	3.00204e-06			AC000068.10	0.233808	0.0348873	0.0470886
ABCC4	0.514611	6.93859e-09	2.37587e-08			AC000078.5	-0.717861	3.1925e-06	6.86724e-06
ABCC6P1	-0.165798	2.09552e-12	9.66122e-12			AC000120.7	-0.663581	8.74955e-06	1.80606e-05
ABCC6P2	-0.135585	3.85315e-06	9.9707e-06			AC002056.3	0.429858	0.000140751	0.000257037
ABCD1	0.818709	1.45569e-13	7.37865e-13			AC002064.4	-0.97768	3.80933e-07	8.90629e-07
ABCD2	-1.36703	4.13761e-26	5.38052e-25			AC002066.1	-2.87379	5.20648e-78	7.68387e-76
ABCD4	-0.635094	9.4069e-28	1.37098e-26			AC002116.7	0.827445	7.11532e-19	3.7953e-18
ABCF1	0.787275	4.57432e-32	9.1361e-31			AC002117.1	-0.974132	6.35157e-11	2.00012e-10
ABCF2	0.628291	7.53643e-26	9.57821e-25			AC002128.5	0.325124	0.0158685	0.0225138
ABCG2	-1.20988	5.65029e-47	3.18813e-45			AC002310.10	0.291656	0.0187789	0.0263826
ABCG8	-0.0517829	0.00470228	0.00813316			AC002310.17	0.818287	4.197e-12	1.43477e-11
ABHD1	-0.31114	3.91473e-27	5.43175e-26			AC002310.7	0.821106	5.19114e-11	1.64559e-10
ABHD12	0.798005	6.01002e-28	8.88342e-27			AC002331.1	0.980334	3.66679e-10	1.09307e-09
ABHD12B	-0.206542	2.09003e-08	6.84964e-08			AC002365.1	0.346176	0.00766319	0.0113594
ABHD14A	-0.449362	1.33692e-10	5.31127e-10			AC002398.13	0.64026	1.49751e-12	5.28969e-12
ABHD14A-ACY1	-0.0198998	0.0217861	0.0336172			AC002398.9	0.464275	0.000183899	0.000331498
ABHD14B	-1.25108	2.14916e-39	7.12152e-38			AC002451.3	-2.06497	4.48434e-43	8.56462e-42
ABHD15	-1.02852	1.8187e-23	1.94403e-22			AC002454.1	-1.25788	1.19383e-19	6.68708e-19
ABHD17AP1	0.0638458	0.0211899	0.0327554			AC002480.3	-1.83784	4.6722e-32	5.13105e-31
ABHD17AP4	0.151584	8.13276e-05	0.000180042			AC002519.6	-0.397725	0.00158823	0.00257139
ABHD17AP6	0.0942693	3.36426e-05	7.81862e-05			AC002553.1	-0.248361	0.0217447	0.0302414
ABHD17C	0.972704	1.64267e-20	1.40784e-19			AC003003.5	1.2328	6.25183e-17	2.92984e-16
ABHD3	0.381372	2.73674e-07	8.04144e-07			AC003005.2	0.450695	0.00162693	0.00263004
ABHD4	-0.508179	3.78561e-12	1.71028e-11			AC003075.4	-0.627592	1.91585e-06	4.20733e-06
ABHD5	-0.579082	3.2842e-13	1.62054e-12			AC003088.1	0.619643	0.000820805	0.00137513
ABHD8	0.407501	1.93973e-06	5.19837e-06			AC003090.1	-1.9107	2.75188e-30	2.74174e-29
ABI2	-0.199777	0.00927638	0.0152894			AC003102.3	1.94578	3.24102e-20	1.8736e-19
ABI3	0.225525	0.0168859	0.0265516			AC003104.1	-0.479457	0.0029103	0.00457186
ABO	-0.590757	9.6829e-13	4.58664e-12			AC003665.1	-0.581477	3.01253e-11	9.71033e-11
ABRACL	2.06933	1.95345e-46	1.058e-44			AC003682.16	-0.93613	2.21561e-13	8.31586e-13
ABTB1	-0.71811	1.52934e-17	1.05417e-16			AC003986.6	-2.85731	7.86552e-57	3.0878e-55
ABTB2	1.08584	6.16337e-23	6.33902e-22			AC003991.3	-0.932441	2.14105e-06	4.67621e-06
AC000032.2	-0.136517	0.000103587	0.000226405			AC004019.13	-0.454053	0.000937521	0.00156101
AC000067.1	0.255632	6.23872e-14	3.26726e-13			AC004053.1	-0.506143	0.00097646	0.00162144
AC000068.10	0.0975294	0.0110931	0.0180141			AC004067.5	0.296205	0.00101354	0.00167978
AC000068.5	0.10345	0.00591852	0.010066			AC004069.2	-0.451995	0.000294368	0.00051907
AC000078.5	-0.123523	0.0161696	0.0255099			AC004156.3	0.980883	7.60337e-13	2.73868e-12
AC000120.7	-0.0957658	0.00117882	0.00223466			AC004158.2	0.610074	4.68253e-06	9.93224e-06
AC000123.4	-0.21911	2.09687e-05	4.99516e-05			AC004160.4	-1.41204	1.30858e-18	6.87106e-18
AC002056.3	0.116955	1.19487e-17	8.29736e-17			AC004166.6	0.556031	3.12016e-12	1.07759e-11
AC002056.5	-0.110254	0.00050957	0.00101696			AC004221.2	0.982093	4.06846e-11	1.2994e-10
AC002064.4	-0.869082	1.11399e-30	2.0032e-29			AC004231.2	-1.11874	1.66583e-09	4.72106e-09
AC002064.5	-0.230068	1.67294e-19	1.32909e-18			AC004237.1	0.436342	0.00017949	0.000323929
AC002066.1	-0.352621	2.39089e-13	1.19201e-12			AC004381.6	0.530444	1.87585e-09	5.29668e-09
AC002116.7	0.340625	1.09188e-12	5.15329e-12			AC004447.2	0.788429	7.09061e-18	3.538e-17
AC002117.1	-0.387438	1.66944e-27	2.37978e-26			AC004449.6	0.460066	0.000522155	0.000895502
AC002310.10	0.0572203	0.00169467	0.00313588			AC004453.8	-0.442225	0.000123406	0.000226628
AC002310.12	0.155569	0.000414887	0.000836938			AC004466.1	-0.524258	1.58628e-05	3.19642e-05
AC002310.17	0.217758	5.98638e-12	2.65455e-11			AC004471.10	-0.538123	5.67199e-06	1.19356e-05
AC002310.7	0.0182002	4.42245e-05	0.0001013			AC004490.1	-2.35132	1.49495e-48	3.82368e-47
AC002331.1	0.508127	1.09582e-17	7.63137e-17			AC004538.3	-1.30151	4.62096e-14	1.81407e-13
AC002383.2	-0.0261712	0.00228545	0.00414823			AC004540.4	-1.31876	2.78932e-16	1.25517e-15
AC002398.11	0.0219553	0.00248289	0.00448382			AC004540.5	-0.498135	0.000148679	0.00027077
AC002398.12	-0.558878	3.15026e-23	3.312e-22			AC004706.1	-0.383392	5.32167e-06	1.12293e-05
AC002398.13	0.498443	2.64908e-13	1.31623e-12			AC004791.2	-0.392512	0.0332534	0.0450021
AC002398.9	0.0298885	1.2069e-05	2.95602e-05			AC004837.5	0.377967	0.0043266	0.00664027
AC002451.3	-0.354096	1.67831e-43	7.39713e-42			AC004893.11	-0.27133	9.62396e-05	0.000178772
AC002467.7	0.112728	0.0141617	0.0225846			AC004895.4	0.258343	0.0266179	0.0365365
AC002480.3	-0.132485	1.79136e-09	6.46103e-09			AC004947.2	-2.53762	3.91696e-29	3.71224e-28
AC002480.4	-0.0701201	0.000693543	0.00135841			AC004951.6	0.267806	0.0100825	0.0147094
AC002519.6	-0.0245949	0.000680046	0.00133346			AC004988.1	1.7479	7.46629e-20	4.22676e-19
AC002519.8	-0.0156275	0.0017989	0.00331647			AC005022.1	-0.453062	0.000475074	0.000818266
AC002539.1	-0.0505273	5.15475e-07	1.4725e-06			AC005062.2	-0.804561	5.87204e-05	0.000111456
AC002553.1	-0.275476	7.59949e-06	1.90523e-05			AC005076.5	-0.311717	0.00139415	0.00227196
AC002985.3	0.0295634	4.52109e-07	1.29941e-06			AC005077.12	0.866674	7.09222e-07	1.61735e-06
AC003002.6	-0.0705617	4.75535e-08	1.50908e-07			AC005077.14	1.15935	4.84097e-10	1.43042e-09
AC003003.5	0.0269527	4.12081e-05	9.47299e-05			AC005082.12	-1.28272	2.02981e-19	1.12172e-18
AC003005.2	0.0621	1.25595e-05	3.07101e-05			AC005104.3	-0.305687	0.0135102	0.019337
AC003006.1	0.439296	2.06401e-11	8.79611e-11			AC005152.3	-4.45744	1.04317e-44	2.15812e-43
AC003006.7	0.0203738	0.0105739	0.0172416			AC005154.6	-0.197284	0.0120707	0.0174048
AC003075.4	-0.114328	2.62134e-05	6.17633e-05			AC005154.7	-0.900139	5.29549e-14	2.07004e-13
AC003088.1	-0.194732	2.28539e-10	8.89415e-10			AC005154.8	-0.349398	0.022241	0.0308927
AC003101.1	-0.0510268	0.00533293	0.00914669			AC005162.5	-0.641568	0.000159949	0.000290165
AC003102.3	0.0733844	3.45129e-06	8.98888e-06			AC005224.2	-0.410797	3.98472e-05	7.69023e-05
AC003665.1	-0.372582	2.09876e-21	1.9221e-20			AC005229.1	-0.365199	4.18573e-06	8.90998e-06
AC003682.16	-0.125491	5.44815e-08	1.71668e-07			AC005237.4	-1.32788	9.11962e-19	4.83449e-18
AC003682.17	-0.0397047	0.00456946	0.00792147			AC005264.2	0.494185	0.000116442	0.000214338
AC003958.2	-0.0124125	0.00580315	0.0098848			AC005280.1	0.607045	3.30127e-25	2.53996e-24
AC003973.1	-0.0220765	0.00777027	0.0129754			AC005329.7	0.879064	1.85962e-08	4.85129e-08
AC003973.6	-0.0404874	1.15653e-06	3.17412e-06			AC005355.2	0.613432	0.00433455	0.00665211
AC003986.5	-0.0073599	0.0247661	0.0378565			AC005356.1	-1.01804	1.35248e-11	4.46748e-11
AC003986.6	-0.645499	2.51675e-22	2.46999e-21			AC005481.5	-0.4815	0.00899271	0.0132058
AC003986.7	-0.0898891	0.0008216	0.00159176			AC005498.3	-0.379225	0.00748983	0.0111173
AC003991.3	-0.0415857	7.69132e-09	2.62155e-08			AC005517.3	-0.726731	1.30035e-07	3.15823e-07
AC004004.2	-0.14972	2.21483e-09	7.92408e-09			AC005519.4	-1.06663	8.45034e-15	3.48078e-14
AC004012.1	-0.0580823	0.0178236	0.0278996			AC005523.3	0.465984	0.00229573	0.00365032
AC004019.10	0.0661453	0.00210193	0.00383594			AC005537.2	-0.927662	1.07933e-05	2.20647e-05
AC004019.13	-0.0438568	1.052e-06	2.90319e-06			AC005540.3	-0.313148	0.0213806	0.0297621
AC004041.2	-0.128791	5.13229e-08	1.62276e-07			AC005546.2	0.512134	0.000324452	0.000569753
AC004051.2	-0.020608	3.17702e-05	7.41183e-05			AC005550.4	-4.1293	2.44812e-83	5.82442e-81
AC004053.1	-0.0253159	4.70177e-09	1.63328e-08			AC005562.1	-0.212127	0.0104851	0.0152532
AC004066.3	-0.195505	3.54311e-09	1.24478e-08			AC005592.1	-2.11098	4.72493e-36	6.23023e-35
AC004069.2	0.18384	6.55704e-05	0.000146808			AC005592.2	-0.682919	4.74918e-06	1.00651e-05
AC004076.9	-0.0341634	0.0094383	0.0155338			AC005594.3	0.272777	0.0325686	0.0441381
AC004112.4	-0.0905721	0.00264971	0.00476218			AC005618.6	-0.400626	0.0194081	0.0272153
AC004158.2	0.0823392	4.67476e-07	1.34095e-06			AC005624.2	1.33974	1.69939e-22	1.12174e-21
AC004158.3	0.0405413	0.0146253	0.0232648			AC005682.5	-3.18698	1.66324e-66	1.16208e-64
AC004159.1	-0.0495784	1.60566e-07	4.82134e-07			AC005682.6	-3.03561	2.51599e-57	1.01515e-55
AC004160.4	-0.488704	3.37439e-16	2.10286e-15			AC005682.7	-1.08051	1.04137e-20	6.20594e-20
AC004166.6	0.181868	1.59207e-05	3.84643e-05			AC005702.1	0.503538	6.38024e-06	1.33385e-05
AC004221.2	0.0667284	8.31793e-06	2.07621e-05			AC005702.4	0.666573	1.14611e-06	2.56843e-06
AC004237.1	-0.0317077	0.00138955	0.00260729			AC005740.5	-0.320656	0.0108733	0.0157754
AC004381.6	0.199703	0.000117439	0.000254739			AC005740.6	-0.901112	2.3016e-13	8.62686e-13
AC004381.7	-0.17007	2.4951e-14	1.35095e-13			AC005754.7	-0.818217	9.92417e-07	2.23235e-06
AC004383.3	0.103302	0.0171598	0.0269521			AC005754.8	-1.08244	3.52536e-09	9.74921e-09
AC004447.2	0.446025	1.05468e-08	3.5589e-08			AC005776.1	0.631684	7.32191e-07	1.6678e-06
AC004449.6	0.175439	1.17417e-09	4.29705e-09			AC005785.2	0.441693	0.000349013	0.000610319
AC004461.4	0.214	4.22218e-19	3.25092e-18			AC005795.1	0.981122	3.55268e-15	1.4985e-14
AC004463.6	0.384628	1.61413e-14	8.8727e-14			AC005822.1	0.439617	1.46915e-06	3.26033e-06
AC004466.1	-0.0746211	7.77578e-07	2.17653e-06			AC006042.6	0.63295	9.34084e-07	2.10732e-06
AC004471.10	0.0320537	0.00517272	0.00888948			AC006115.3	-0.98478	9.04439e-06	1.86497e-05
AC004471.9	0.268194	7.53909e-22	7.10628e-21			AC006116.15	-0.293551	0.033691	0.0455586
AC004485.3	0.0812183	0.00239364	0.00433272			AC006116.17	0.276445	0.0175893	0.0248175
AC004490.1	-0.215044	2.62981e-15	1.53395e-14			AC006116.20	-1.58536	2.49398e-26	2.03636e-25
AC004538.3	-0.302664	1.42416e-14	7.8676e-14			AC006116.22	-0.32452	0.0171977	0.0242985
AC004540.4	-0.288441	1.82223e-05	4.37379e-05			AC006126.3	0.371627	0.00352966	0.00548335
AC004540.5	-0.566841	8.75087e-24	9.59884e-23			AC006126.4	0.480148	0.000252466	0.000448132
AC004543.2	-0.0721455	0.00035973	0.000731665			AC006129.1	-0.413135	0.00436678	0.00669598
AC004549.6	0.0224968	0.00114454	0.0021742			AC006129.2	-0.401872	0.0142927	0.0203893
AC004562.1	-0.647551	7.16762e-33	1.51807e-31			AC006160.5	-0.517305	3.54818e-05	6.88553e-05
AC004593.3	0.069071	0.0110097	0.017887			AC006272.2	0.377085	0.0034525	0.00537103
AC004603.4	-0.0140673	7.39577e-07	2.0743e-06			AC006273.4	-0.65849	2.89986e-05	5.68681e-05
AC004692.5	0.0301324	0.0028151	0.00503981			AC006273.5	-0.780479	0.000415362	0.000720002
AC004791.2	-0.194586	1.838e-12	8.51057e-12			AC006372.4	0.500264	0.00193264	0.00309684
AC004837.5	0.102287	0.0151696	0.0240604			AC006378.2	-0.859462	2.96526e-16	1.33217e-15
AC004854.4	0.0689678	2.62612e-05	6.18719e-05			AC006460.2	-0.502412	0.000334507	0.000586216
AC004854.5	0.0379645	0.0210429	0.0325544			AC006480.1	-0.280082	0.0164181	0.0232542
AC004893.11	-0.186262	3.28606e-05	7.65201e-05			AC006483.5	0.530664	3.52628e-05	6.84616e-05
AC004895.4	0.0277981	0.0162733	0.0256592			AC006538.1	0.45066	0.00103608	0.00171518
AC004911.2	-0.0562637	5.07409e-06	1.29472e-05			AC006547.14	-1.30268	4.25325e-16	1.89416e-15
AC004924.1	-0.0815381	0.0018869	0.00346573			AC006942.4	0.622266	3.82741e-05	7.40112e-05
AC004947.2	-0.478309	1.71914e-46	9.33867e-45			AC006946.12	-0.400916	0.00263279	0.00415649
AC004951.6	0.0395891	0.00818686	0.0136161			AC006946.15	0.434709	0.0034328	0.00534339
AC004967.7	0.735563	1.38617e-22	1.39343e-21			AC006946.16	-2.22822	2.1858e-24	1.6018e-23
AC004980.7	0.161231	4.33334e-05	9.93585e-05			AC006946.17	-1.99539	2.6926e-22	1.75633e-21
AC004988.1	0.148709	4.78796e-07	1.37224e-06			AC006978.6	0.215975	0.00374917	0.00580186
AC005009.1	-0.136615	1.09421e-06	3.01283e-06			AC007000.10	-0.485199	0.000590201	0.00100546
AC005009.2	-0.0443333	1.88309e-05	4.51154e-05			AC007000.11	-0.644202	5.00817e-09	1.3701e-08
AC005013.1	-0.769195	4.8476e-10	1.83198e-09			AC007000.12	-0.65139	5.72451e-09	1.55742e-08
AC005014.5	0.00635028	0.0332206	0.0495677			AC007036.4	-0.53824	0.000104051	0.000192543
AC005017.2	0.015946	0.00311505	0.00553898			AC007036.6	-0.375088	0.00987278	0.0144194
AC005037.3	0.0359096	0.000602221	0.00118956			AC007038.7	-0.726769	9.79338e-09	2.61113e-08
AC005042.4	0.309785	7.14499e-09	2.44448e-08			AC007040.11	-0.964221	2.98015e-10	8.94565e-10
AC005062.2	-0.32789	3.65269e-12	1.65166e-11			AC007040.7	-0.60292	6.18507e-05	0.000117091
AC005076.5	-0.103482	0.00661859	0.0111751			AC007128.1	1.0788	6.25368e-08	1.56133e-07
AC005077.12	-0.612276	2.93705e-18	2.13258e-17			AC007163.3	0.745581	5.816e-06	1.22238e-05
AC005077.14	-0.902568	8.24171e-17	5.3731e-16			AC007193.6	-0.565137	0.000225004	0.000401607
AC005077.7	0.0183493	0.0251448	0.0383918			AC007204.2	0.569148	8.07447e-05	0.000151241
AC005082.12	0.224289	0.00154426	0.00287523			AC007228.11	-1.05703	4.41556e-17	2.08737e-16
AC005102.1	0.0398697	1.00989e-07	3.09775e-07			AC007228.9	-0.382859	0.0102186	0.0148929
AC005104.3	-0.113532	0.0266495	0.0405178			AC007246.3	-0.245253	0.000589042	0.00100367
AC005154.6	-0.28481	5.99534e-11	2.45512e-10			AC007249.3	-1.00241	1.13305e-16	5.23519e-16
AC005154.7	-0.424424	9.10989e-25	1.07149e-23			AC007255.8	1.89639	1.38228e-30	1.40302e-29
AC005154.8	-0.365327	3.11161e-11	1.30501e-10			AC007256.5	-0.298515	0.0278705	0.0381589
AC005162.5	0.12282	0.015872	0.0250882			AC007277.3	-0.681554	3.39892e-05	6.6096e-05
AC005197.2	0.067373	0.000830642	0.00160842			AC007279.2	-0.437654	0.000759163	0.00127713
AC005220.3	-0.0164692	0.00567909	0.00969008			AC007283.4	-0.34132	0.00600594	0.00903675
AC005229.1	-0.406477	6.92992e-06	1.74433e-05			AC007285.7	0.80836	4.56934e-10	1.35305e-09
AC005237.2	0.0463731	0.000264719	0.000547989			AC007292.6	0.354231	0.000938163	0.00156189
AC005237.4	-0.209783	4.06869e-07	1.17571e-06			AC007292.7	0.458609	0.000211733	0.000378877
AC005255.3	0.267641	1.82324e-05	4.37589e-05			AC007319.1	-1.74542	7.59987e-20	4.30062e-19
AC005264.2	0.0182207	2.0442e-05	4.87511e-05			AC007362.3	-0.978033	4.24919e-10	1.26177e-09
AC005280.1	0.481491	3.17719e-16	1.98336e-15			AC007365.3	-0.442888	0.000998325	0.00165605
AC005281.1	0.0938825	1.17588e-07	3.57926e-07			AC007365.4	-0.264901	0.0140117	0.0200142
AC005304.1	-0.0296628	0.00549069	0.00939296			AC007383.3	-0.371663	3.00316e-07	7.07964e-07
AC005324.6	0.0240742	0.0309229	0.0463939			AC007386.2	0.682207	3.29732e-05	6.42198e-05
AC005336.4	-0.391642	9.53161e-13	4.51857e-12			AC007387.2	-0.510275	2.18234e-05	4.33733e-05
AC005336.5	-0.0489775	0.012724	0.0204548			AC007392.3	-1.05586	8.08834e-16	3.5404e-15
AC005355.2	-0.40633	9.57423e-27	1.29252e-25			AC007405.6	0.498211	0.000407466	0.000707025
AC005356.1	-0.361588	7.39147e-09	2.52431e-08			AC007461.2	-2.02863	2.87242e-32	3.18111e-31
AC005481.5	-0.0499581	4.15393e-10	1.579e-09			AC007551.3	-0.673195	6.65669e-14	2.58748e-13
AC005487.2	0.0176795	0.000247295	0.000513643			AC007566.10	-0.851996	2.18148e-14	8.74177e-14
AC005498.3	-0.0522968	0.00212701	0.00387881			AC007743.1	-2.11287	2.13333e-24	1.56542e-23
AC005498.4	-0.0699101	0.000379055	0.000768825			AC007750.5	1.17684	2.71028e-15	1.15128e-14
AC005517.3	-0.523713	1.23473e-13	6.30687e-13			AC007773.2	0.643112	1.35005e-07	3.2752e-07
AC005519.4	-0.341757	1.36039e-14	7.52672e-14			AC007796.1	-0.62638	1.92233e-06	4.22023e-06
AC005532.5	0.0841718	1.07304e-06	2.95723e-06			AC007879.2	-0.966041	5.36219e-15	2.2351e-14
AC005534.6	0.200624	3.41696e-07	9.93048e-07			AC007879.5	-0.521884	3.47502e-05	6.75234e-05
AC005534.8	0.0574466	0.0163569	0.0257797			AC007879.7	-1.11382	6.77162e-16	2.9749e-15
AC005540.3	0.0787142	0.000399386	0.00080732			AC007919.18	0.473412	0.0101461	0.0147982
AC005550.4	-1.70801	2.08518e-35	5.2273e-34			AC007952.5	0.635582	9.14681e-05	0.000170379
AC005592.1	-0.087523	1.92961e-07	5.74861e-07			AC007966.1	-0.556304	0.001589	0.00257234
AC005592.3	-0.0388902	0.00257784	0.00464263			AC007969.5	0.290762	0.0364101	0.0490192
AC005594.3	-0.0427449	9.7557e-05	0.000213828			AC007970.1	-0.939018	7.40813e-13	2.6708e-12
AC005618.6	0.140622	4.97154e-05	0.000113109			AC008073.7	-0.686722	8.15714e-08	2.01703e-07
AC005624.2	0.413164	1.43906e-21	1.33063e-20			AC008074.3	-0.625927	1.94632e-06	4.26679e-06
AC005625.1	-0.0597142	0.000104097	0.000227492			AC008088.4	1.1889	6.23641e-11	1.96543e-10
AC005682.5	-0.482715	5.73227e-12	2.54682e-11			AC008174.3	-0.815022	7.49535e-08	1.85964e-07
AC005682.6	-0.655273	4.97014e-21	4.43372e-20			AC008268.2	-1.22418	1.41032e-10	4.32371e-10
AC005740.5	-0.13665	8.11322e-07	2.26593e-06			AC008269.2	-0.354007	0.0127449	0.018311
AC005740.6	-0.338427	6.33377e-31	1.15896e-29			AC008391.1	-0.420497	0.0130125	0.018674
AC005754.8	-0.109091	0.00952635	0.0156659			AC008440.10	-0.589039	0.00012573	0.000230758
AC005775.2	0.0338218	0.0300048	0.0451484			AC008592.3	-0.352077	0.00716235	0.0106651
AC005776.1	0.149887	1.46931e-06	3.9881e-06			AC008592.8	-1.58527	1.01504e-24	7.57108e-24
AC005786.3	0.0809419	0.00103433	0.001977			AC008753.6	-0.602749	1.2471e-05	2.53779e-05
AC005786.5	0.03043	0.0019698	0.00360745			AC008781.7	-0.261624	0.0272402	0.0373461
AC005795.1	0.157803	3.32846e-10	1.27668e-09			AC008937.3	0.250044	0.0305578	0.0415784
AC005863.1	0.392715	1.66008e-10	6.54584e-10			AC008982.2	-0.575777	6.3771e-05	0.000120545
AC006024.4	-0.00551271	0.0224847	0.0346116			AC009005.2	2.29283	5.58166e-39	8.56744e-38
AC006026.10	0.0204313	0.000298863	0.000614935			AC009095.4	-0.364061	0.00483409	0.00736794
AC006026.13	-0.66855	3.59607e-12	1.62707e-11			AC009120.3	-0.705892	7.25852e-11	2.27637e-10
AC006033.22	-0.141191	1.41639e-06	3.85107e-06			AC009120.5	-0.638595	2.37117e-06	5.1584e-06
AC006041.1	-0.0340079	1.03966e-05	2.56471e-05			AC009120.6	-0.628256	6.50069e-11	2.04428e-10
AC006042.6	-0.54582	8.23749e-11	3.33311e-10			AC009133.14	1.13469	5.88132e-55	2.09978e-53
AC006115.3	0.221022	2.47404e-05	5.84362e-05			AC009228.1	-0.9653	1.01181e-16	4.68916e-16
AC006116.12	-0.127644	1.15048e-09	4.2167e-09			AC009229.6	-0.443279	0.0017363	0.00279619
AC006116.13	-0.0300466	0.000270899	0.000560147			AC009237.8	0.354853	0.000422821	0.000732104
AC006116.15	-0.0498574	2.52235e-10	9.7777e-10			AC009245.3	-0.456666	5.50414e-06	1.15974e-05
AC006116.19	-0.0558141	0.0163945	0.0258346			AC009299.2	-0.666376	1.71237e-05	3.43769e-05
AC006116.20	-0.432623	1.08857e-18	8.1258e-18			AC009299.5	-0.669125	3.39703e-05	6.60639e-05
AC006116.21	-0.0199788	0.0173446	0.0272176			AC009302.2	0.521617	1.57111e-06	3.47933e-06
AC006116.22	-0.0477775	1.84866e-11	7.91165e-11			AC009336.24	1.49978	1.09552e-15	4.7538e-15
AC006129.1	-0.765952	2.0667e-44	9.83436e-43			AC009473.1	-0.452665	0.000239691	0.000426554
AC006129.2	0.184278	0.00990833	0.0162538			AC009495.2	-1.30709	4.43765e-13	1.63033e-12
AC006129.4	-0.223302	7.10379e-05	0.000158437			AC009495.3	-0.946937	6.29068e-10	1.83851e-09
AC006159.3	0.0306241	0.00155989	0.0029024			AC009495.4	-0.875485	4.94095e-10	1.45887e-09
AC006159.4	-0.0398242	3.29384e-09	1.1609e-08			AC009501.4	-1.09291	6.0954e-21	3.68582e-20
AC006159.5	-0.311493	2.92484e-13	1.44891e-12			AC009505.2	-0.348513	0.0139344	0.0199089
AC006262.10	0.244167	1.21161e-06	3.31681e-06			AC009506.1	-0.239079	0.0039173	0.00604505
AC006262.4	0.0739196	0.0328874	0.0491008			AC009542.2	-0.9138	1.24112e-11	4.10651e-11
AC006262.5	0.24342	3.06467e-06	8.02436e-06			AC009784.3	-0.667306	7.27905e-07	1.65817e-06
AC006272.1	-0.132864	9.7353e-05	0.000213406			AC009948.5	-0.263806	0.00131819	0.00215543
AC006272.2	0.0555947	0.00065643	0.00128986			AC009961.2	0.496911	4.98171e-05	9.5251e-05
AC006273.4	-0.136495	3.37159e-16	2.10148e-15			AC009961.3	0.767922	1.47666e-15	6.35968e-15
AC006273.5	-0.533854	4.2313e-13	2.06882e-12			AC010095.5	-0.749348	4.18793e-07	9.7321e-07
AC006369.2	0.113593	0.00212621	0.00387753			AC010136.2	-1.00855	1.38674e-12	4.90971e-12
AC006378.2	-0.400548	2.76721e-16	1.73665e-15			AC010148.1	-0.701539	0.000379348	0.000660353
AC006466.5	-0.0376103	0.00893473	0.0147744			AC010226.4	-0.568822	3.64662e-12	1.25392e-11
AC006480.1	-0.179023	0.00073978	0.00144283			AC010240.2	-0.456436	0.000726119	0.00122393
AC006483.5	0.267216	1.98924e-17	1.36114e-16			AC010336.1	0.718822	1.22988e-08	3.25303e-08
AC006538.1	0.432595	1.39076e-16	8.93112e-16			AC010468.1	-0.591596	8.60093e-08	2.12258e-07
AC006547.14	-0.17622	1.35412e-05	3.29974e-05			AC010524.4	-0.348993	0.0237951	0.032932
AC006942.4	-0.120265	0.00624137	0.0105769			AC010525.4	0.317493	0.00931502	0.0136474
AC006946.12	-0.113195	0.000540631	0.0010753			AC010536.1	0.381395	0.000296327	0.000522358
AC006946.15	0.0357757	0.0154048	0.024409			AC010547.9	-0.806742	2.07032e-09	5.82672e-09
AC006946.17	-0.16157	0.0127464	0.020488			AC010642.1	0.262522	0.0187954	0.0264044
AC006960.5	-0.243678	1.24595e-17	8.63566e-17			AC010733.5	0.371379	0.000954857	0.00158805
AC006978.6	-0.305797	0.000236268	0.000492057			AC010761.13	-0.499163	0.00189534	0.0030399
AC006994.1	-0.0264991	0.0130873	0.0209859			AC010761.14	0.814426	1.47042e-10	4.50195e-10
AC007000.10	-0.143911	1.12644e-06	3.09621e-06			AC010761.8	0.274463	0.00747643	0.0110986
AC007000.11	-0.437878	4.28708e-12	1.92633e-11			AC010761.9	0.669478	4.61524e-06	9.79403e-06
AC007000.12	-0.186261	1.55283e-12	7.23884e-12			AC010883.5	-0.744729	7.63047e-10	2.21716e-09
AC007009.2	-0.0819986	0.0110173	0.0178981			AC010890.1	-2.1974	1.62289e-49	4.36961e-48
AC007016.3	0.186194	7.2834e-12	3.20938e-11			AC010900.2	0.353762	0.00316268	0.00494357
AC007036.4	-0.132296	1.4436e-07	4.35481e-07			AC010976.2	-0.446536	8.53584e-05	0.000159353
AC007038.7	-0.18432	4.39066e-07	1.26414e-06			AC010980.2	-1.24693	1.00628e-09	2.89767e-09
AC007040.11	0.039329	0.0116945	0.0189071			AC011242.6	-1.8723	1.81242e-35	2.33625e-34
AC007040.6	0.0190109	0.0158738	0.02509			AC011290.5	0.621212	1.24741e-07	3.03634e-07
AC007040.7	0.11273	7.82905e-06	1.95955e-05			AC011330.5	-0.418809	0.00827306	0.0122148
AC007041.2	0.0740712	3.28678e-14	1.76177e-13			AC011513.4	0.927606	5.40187e-11	1.71043e-10
AC007128.1	0.0993935	7.06353e-05	0.000157572			AC011526.1	-1.72788	3.43135e-61	1.75043e-59
AC007163.3	-0.0227857	0.000339443	0.000692954			AC011738.4	-3.11366	7.22083e-63	4.092e-61
AC007163.8	-0.093568	7.55e-08	2.3459e-07			AC011747.3	0.523974	0.001101	0.00181655
AC007182.6	0.0305214	0.00951723	0.0156528			AC011747.4	1.07063	8.93591e-10	2.5818e-09
AC007193.10	-0.125497	3.13658e-17	2.11211e-16			AC011747.7	-0.774436	7.98154e-11	2.49914e-10
AC007204.2	0.253415	3.28561e-14	1.76144e-13			AC011893.3	2.86302	3.76756e-57	1.49823e-55
AC007228.11	-0.258032	4.43226e-20	3.68345e-19			AC011899.9	0.339839	0.00307245	0.00481234
AC007228.5	-0.0455063	4.0073e-05	9.23067e-05			AC012065.5	-0.998902	2.38881e-14	9.549e-14
AC007228.8	0.0703624	0.0224332	0.0345395			AC012074.2	-1.18391	7.36202e-18	3.66797e-17
AC007228.9	-0.155036	0.0111723	0.0181313			AC012146.7	-0.434023	5.09052e-05	9.72842e-05
AC007229.3	0.151201	5.65876e-05	0.000127803			AC012314.8	0.675456	5.88648e-10	1.72586e-09
AC007238.1	-0.0737307	0.000823396	0.00159498			AC012354.8	0.423939	0.000372989	0.000649818
AC007246.3	-0.419192	5.60863e-25	6.70278e-24			AC012358.4	0.170915	0.0340621	0.0460401
AC007255.8	-0.240887	1.3355e-07	4.0421e-07			AC012358.8	-1.05679	1.39052e-17	6.79572e-17
AC007271.3	-0.0475251	4.68654e-09	1.62814e-08			AC012360.4	0.562991	1.77921e-05	3.56669e-05
AC007272.3	-0.0174527	0.000236902	0.000493292			AC012360.6	-0.817358	4.74804e-05	9.10165e-05
AC007277.3	-0.0334384	9.91238e-08	3.04181e-07			AC012363.7	-0.361177	0.00481607	0.00734331
AC007278.2	-0.0145787	0.00246859	0.00445976			AC012363.8	-0.435587	0.000686307	0.00116051
AC007278.3	-0.0350025	0.0187415	0.0292284			AC012442.6	0.252294	0.00818154	0.0120862
AC007282.6	-0.108437	6.62001e-08	2.06804e-07			AC012485.2	-0.598978	0.000928374	0.00154624
AC007285.6	0.0557773	0.0106388	0.017335			AC013268.3	1.1047	1.0428e-11	3.46987e-11
AC007285.7	0.129003	2.7869e-05	6.54062e-05			AC013394.2	-0.244606	0.000789588	0.00132525
AC007292.1	0.118984	0.00448847	0.00779107			AC013439.4	0.96728	1.35225e-07	3.27997e-07
AC007292.3	0.0517812	0.0031308	0.00556428			AC013449.1	0.37221	0.00104732	0.00173296
AC007292.6	0.161717	0.000126697	0.000273731			AC013460.1	-0.526369	0.000610924	0.00103864
AC007292.7	0.204136	4.3632e-07	1.25682e-06			AC013463.2	-1.19369	2.92137e-09	8.12824e-09
AC007318.5	0.245602	0.00271819	0.00487591			AC013717.3	-0.279246	0.0232516	0.0322052
AC007326.9	0.111108	2.8325e-06	7.45126e-06			AC015849.16	3.08289	5.24002e-51	1.53518e-49
AC007349.7	-0.0338786	0.000111882	0.00024341			AC015849.2	0.754076	5.78689e-07	1.32978e-06
AC007365.1	0.0578808	1.57547e-07	4.73458e-07			AC015922.7	-0.345077	0.00583908	0.00880152
AC007365.4	0.106784	0.0223451	0.0344097			AC015971.2	-0.616797	9.19822e-05	0.000171233
AC007381.2	0.0504445	1.67125e-05	4.02624e-05			AC015987.1	1.01498	8.95469e-09	2.39678e-08
AC007381.3	0.056796	9.46724e-08	2.90908e-07			AC016292.3	0.747631	3.78776e-17	1.79705e-16
AC007383.3	-0.287053	3.86427e-08	1.2362e-07			AC016582.2	-0.984187	2.84873e-06	6.15848e-06
AC007386.2	0.0118313	0.0106865	0.0174081			AC016629.8	0.491521	1.90688e-07	4.56983e-07
AC007386.4	0.229277	4.25379e-06	1.09522e-05			AC016683.5	0.618825	1.12333e-05	2.29217e-05
AC007387.2	-0.155958	0.00548128	0.009379			AC016712.2	-0.814322	2.03915e-11	6.64893e-11
AC007389.1	-0.0174518	0.00730654	0.0122566			AC016722.4	-0.808487	1.8361e-11	6.00813e-11
AC007395.4	0.0419631	0.0141964	0.022635			AC016734.2	0.449459	2.60234e-05	5.12995e-05
AC007403.2	-0.0178929	0.000289743	0.000596944			AC016735.2	-3.56545	2.22616e-31	2.36389e-30
AC007405.4	-0.0464887	1.33259e-08	4.45093e-08			AC016738.4	-0.833694	5.9459e-06	1.24749e-05
AC007405.6	-0.170189	0.0202977	0.0314871			AC016739.2	-0.34593	0.00627125	0.00941131
AC007551.2	-0.0132069	0.016496	0.0259821			AC016747.3	-0.484771	0.00012712	0.000233153
AC007551.3	-0.263872	4.22379e-24	4.7386e-23			AC016757.3	-0.726135	2.20451e-05	4.37919e-05
AC007563.3	-0.091575	1.82348e-13	9.17907e-13			AC016831.7	-1.12102	3.48077e-07	8.16232e-07
AC007563.4	-0.130398	6.47609e-14	3.38525e-13			AC016907.3	-0.823651	7.24148e-10	2.10857e-09
AC007563.5	-0.0347451	3.32059e-06	8.66272e-06			AC016995.3	-4.10275	3.1826e-94	1.75667e-91
AC007566.10	-0.482487	3.46371e-14	1.85283e-13			AC016999.2	0.476179	6.51884e-05	0.000123072
AC007743.1	-0.722892	8.21988e-30	1.39032e-28			AC017002.1	1.76028	3.21386e-33	3.71891e-32
AC007750.5	0.0648584	7.9139e-07	2.2123e-06			AC017002.2	0.328994	0.0186807	0.026254
AC007773.2	0.379456	2.87221e-15	1.66866e-14			AC017060.1	1.06495	8.67528e-08	2.13978e-07
AC007796.1	-0.134909	3.12321e-16	1.95067e-15			AC017074.2	0.560566	3.09926e-06	6.67917e-06
AC007875.3	-0.0362985	0.0139172	0.0222214			AC017104.6	0.580209	1.58163e-06	3.50152e-06
AC007879.7	-0.302064	7.69053e-09	2.62153e-08			AC018462.2	-0.681261	4.96345e-08	1.2488e-07
AC007880.1	0.0384305	9.58242e-05	0.000210257			AC018470.4	-1.41509	3.50137e-14	1.38598e-13
AC007966.1	-0.0743473	0.000620465	0.00122407			AC018638.1	-0.303214	0.00684342	0.0102194
AC007970.1	-0.112973	5.9197e-06	1.49957e-05			AC018647.3	-1.54581	1.98949e-34	2.45995e-33
AC008063.2	-0.172919	4.47171e-11	1.84989e-10			AC018755.16	0.477726	0.00136811	0.0022315
AC008069.2	-0.0693493	0.0305733	0.0459166			AC018804.1	0.864563	1.79193e-09	5.06697e-09
AC008073.7	-0.0463041	0.000574575	0.00113828			AC018804.7	-1.03977	0.000958455	0.00159375
AC008073.9	-0.0622289	1.05745e-05	2.60591e-05			AC018816.3	1.64111	2.05702e-08	5.34404e-08
AC008074.3	0.068062	0.0187978	0.02931			AC019050.1	0.721478	1.18884e-07	2.8994e-07
AC008074.4	0.0697956	0.0105894	0.0172657			AC019117.1	1.14428	8.10736e-06	1.67814e-05
AC008155.1	0.260724	1.80488e-08	5.95313e-08			AC019117.2	1.20603	2.83523e-07	6.69753e-07
AC008174.3	-0.116204	0.000505868	0.00101013			AC019171.1	-0.849166	2.407e-08	6.21988e-08
AC008268.1	-2.12533	9.0448e-34	2.03132e-32			AC019181.2	-0.566752	0.00364429	0.00564781
AC008269.2	-0.0663186	0.0106498	0.0173521			AC019181.3	-0.530724	4.91428e-05	9.40139e-05
AC008391.1	-0.765487	2.42341e-14	1.3139e-13			AC020571.3	-0.394358	0.00765571	0.0113489
AC008427.2	0.0348773	0.0105937	0.0172701			AC020907.1	-0.625609	0.00384101	0.00593629
AC008440.10	-0.13998	0.000303102	0.000622847			AC021016.6	0.322644	0.0298378	0.0406608
AC008592.3	0.15457	0.00559026	0.00954894			AC021188.4	-2.01262	1.0741e-41	1.91122e-40
AC008592.8	0.206802	0.00747821	0.012529			AC022007.5	-1.02331	1.19533e-26	9.93341e-26
AC008697.1	0.0132153	0.0146548	0.0233077			AC022154.7	0.410216	0.000889915	0.00148515
AC008746.10	0.027963	0.00763042	0.0127582			AC022182.1	0.446306	0.00426887	0.00655751
AC008746.12	-0.163208	0.00417508	0.00728401			AC022182.2	0.452703	0.000299829	0.000528126
AC008746.3	0.122347	3.2134e-09	1.13332e-08			AC022431.1	-0.50295	1.86907e-06	4.10788e-06
AC008746.5	-0.417723	4.88723e-08	1.54877e-07			AC022431.2	-1.13901	1.32637e-09	3.78505e-09
AC008752.2	-0.170851	1.98462e-05	4.74294e-05			AC022596.6	-2.19241	7.7791e-29	7.27755e-28
AC008753.6	-0.316976	4.09173e-14	2.1722e-13			AC022819.3	-1.21362	2.31081e-16	1.04393e-15
AC008937.2	-0.0895106	0.00299972	0.00535009			AC023137.2	0.91548	3.06777e-09	8.52353e-09
AC008940.1	-0.0218749	0.000293982	0.00060537			AC023590.1	0.842835	2.64601e-08	6.81328e-08
AC008984.6	0.0123173	0.0214065	0.0330664			AC024560.2	-0.402293	0.00665363	0.00995375
AC008991.1	-0.0789393	1.07214e-10	4.29633e-10			AC024704.2	-0.473029	0.00018366	0.000331089
AC008992.1	-0.0337562	0.000126556	0.000273458			AC024937.4	0.333291	0.0296044	0.0403727
AC009005.2	0.708156	9.69745e-13	4.59293e-12			AC025165.8	-1.45913	4.02127e-23	2.7593e-22
AC009014.3	0.032905	0.000425836	0.000857838			AC025335.1	-0.206591	0.00549473	0.00831288
AC009120.3	-0.477569	2.57679e-09	9.16867e-09			AC026150.8	-1.49706	2.78169e-31	2.93796e-30
AC009120.5	-0.312901	2.91332e-06	7.64841e-06			AC026271.5	0.367474	5.63622e-07	1.29634e-06
AC009120.6	-0.369131	4.17804e-09	1.45773e-08			AC026471.6	0.761216	1.55935e-06	3.4544e-06
AC009120.8	0.0271706	0.000997875	0.00191243			AC026904.1	-1.74348	5.6698e-31	5.88473e-30
AC009133.14	0.287752	8.94447e-16	5.39867e-15			AC027307.3	-1.77977	4.16689e-46	9.34943e-45
AC009133.17	0.0557036	0.0139175	0.0222214			AC027612.6	-0.615545	1.70831e-07	4.10964e-07
AC009227.2	0.0375975	6.27798e-09	2.15717e-08			AC027763.2	-0.501055	4.34603e-13	1.59816e-12
AC009228.1	-0.0692306	0.00302972	0.00539805			AC053503.4	1.26616	5.10187e-26	4.1026e-25
AC009236.2	0.05809	5.22433e-07	1.49109e-06			AC061992.2	-0.508638	0.000144148	0.00026297
AC009237.11	0.239719	0.0058183	0.00990829			AC062017.1	-0.437536	0.00237428	0.00376886
AC009237.8	0.517724	6.79029e-18	4.80315e-17			AC062028.1	1.32628	2.443e-08	6.30995e-08
AC009245.3	-0.080693	0.0289082	0.0436352			AC064850.4	1.10455	2.07924e-15	8.87865e-15
AC009299.2	-0.0643382	2.00829e-07	5.97423e-07			AC064875.2	-1.47873	1.59391e-18	8.31701e-18
AC009299.5	-0.200287	0.00172969	0.00319533			AC067945.3	0.435976	0.00188304	0.00302123
AC009302.2	0.0535368	2.45189e-05	5.79414e-05			AC067945.4	-0.374872	0.00817508	0.0120786
AC009312.1	-0.0304179	0.00800067	0.0133247			AC068134.10	-0.298795	0.00976539	0.0142701
AC009336.24	0.545037	6.37842e-13	3.06841e-12			AC068137.13	1.38595	5.85515e-16	2.58297e-15
AC009403.2	0.186386	1.68272e-05	4.05308e-05			AC068282.3	0.452014	4.22936e-05	8.14075e-05
AC009404.2	-0.0833927	0.00819789	0.013632			AC068533.7	0.317411	0.00914552	0.013414
AC009473.1	-0.135458	7.92304e-11	3.21035e-10			AC068580.5	1.39996	6.64424e-16	2.92033e-15
AC009478.1	0.071041	2.22608e-08	7.28306e-08			AC068580.6	1.44284	4.45521e-19	2.40758e-18
AC009495.3	-0.2002	5.41226e-12	2.41111e-11			AC068587.2	-1.42264	3.60033e-20	2.07739e-19
AC009495.4	-0.0702836	0.0316151	0.0473467			AC068610.3	-0.592757	2.59302e-05	5.11267e-05
AC009501.4	0.194882	0.000193056	0.000406921			AC068641.1	-0.831735	1.87252e-10	5.7027e-10
AC009506.1	-0.400593	7.66405e-13	3.66223e-12			AC068831.3	0.647883	2.85378e-06	6.16796e-06
AC009950.2	-0.0876376	0.00275317	0.00493548			AC068831.6	0.651922	1.49107e-09	4.23927e-09
AC009955.8	0.1884	2.07601e-11	8.84624e-11			AC069213.1	-0.936577	1.39904e-05	2.83298e-05
AC009961.5	-0.105161	1.35737e-05	3.307e-05			AC069257.6	0.292575	0.0349675	0.0471875
AC010090.1	-0.214963	3.68612e-21	3.31669e-20			AC069282.6	-0.409092	4.4174e-05	8.48964e-05
AC010092.1	0.0767141	0.00192012	0.00352142			AC069513.4	1.08555	3.37218e-13	1.24987e-12
AC010095.5	-0.185901	8.44945e-06	2.10759e-05			AC072052.7	-0.427329	0.00543859	0.00823279
AC010136.2	-0.291096	1.77901e-15	1.05029e-14			AC073043.1	0.426264	0.00162041	0.00262104
AC010148.1	-0.0314826	0.00135169	0.00254082			AC073046.25	0.370027	0.0131671	0.018883
AC010226.4	-0.401743	2.17158e-26	2.86478e-25			AC073052.1	0.336017	0.0213725	0.0297553
AC010336.1	0.0239201	1.35439e-09	4.93528e-09			AC073063.10	-0.334103	0.000216676	0.000387293
AC010423.1	-0.0822853	0.00225144	0.00408893			AC073072.5	-2.63056	1.43529e-41	2.52461e-40
AC010458.1	-0.204184	9.09697e-06	2.26229e-05			AC073072.7	0.275333	0.0333991	0.045186
AC010468.1	-0.105815	0.0155852	0.0246712			AC073130.3	-2.44271	1.51735e-54	5.30746e-53
AC010492.5	-0.0143097	0.0297326	0.0447648			AC073133.1	-0.932699	5.53287e-08	1.38815e-07
AC010504.2	-0.137892	9.9327e-05	0.000217511			AC073236.3	-0.536357	0.0118648	0.0171248
AC010524.2	0.421384	3.71743e-10	1.42019e-09			AC073257.2	-1.16135	3.19876e-11	1.02902e-10
AC010536.1	0.206	5.32085e-14	2.80065e-13			AC073283.4	-0.925882	5.92268e-08	1.48083e-07
AC010547.9	-0.0266775	3.42211e-15	1.97648e-14			AC073283.7	-0.476132	0.000182244	0.000328687
AC010642.1	0.101211	5.33078e-13	2.58147e-12			AC073343.1	-0.514185	9.9693e-06	2.04605e-05
AC010729.1	0.292768	9.19238e-24	1.0068e-22			AC073343.13	-0.319657	0.00701075	0.010454
AC010729.2	0.0223919	0.000112533	0.000244738			AC073410.1	0.337052	0.00666517	0.00996993
AC010731.2	-0.0626654	0.0306219	0.0459839			AC073621.2	-1.25597	1.41323e-22	9.36878e-22
AC010733.4	0.0437848	9.75655e-07	2.70459e-06			AC073635.5	-0.325248	0.0323129	0.0438066
AC010745.4	-0.10557	6.61965e-17	4.33734e-16			AC073869.1	0.339917	0.0282165	0.0386059
AC010761.13	-0.507211	3.52162e-19	2.73345e-18			AC074011.2	-0.996364	9.2761e-15	3.80898e-14
AC010761.14	0.0450542	0.0292254	0.0440794			AC074117.10	0.331362	1.09175e-05	2.23086e-05
AC010883.5	-0.141922	0.00576428	0.00982456			AC074117.13	-0.382194	0.00273123	0.00430476
AC010900.2	0.0992997	4.49077e-12	2.01438e-11			AC074212.3	0.561093	2.21155e-06	4.8237e-06
AC010967.2	0.158306	5.86655e-11	2.40454e-10			AC074212.5	0.428466	0.0065703	0.00983549
AC010969.1	-0.39036	9.2023e-15	5.15244e-14			AC074286.1	-1.08014	8.49599e-22	5.38398e-21
AC010980.2	0.140406	6.65814e-06	1.67904e-05			AC074289.1	-2.51709	1.82499e-59	8.33877e-58
AC010982.1	0.198733	1.16678e-09	4.2717e-09			AC074389.9	0.973873	0.000225985	0.000403228
AC011239.1	-0.0836716	0.02435	0.0372783			AC074391.1	-0.335836	0.00752678	0.0111704
AC011242.6	-0.420123	5.3861e-08	1.69786e-07			AC078883.3	-0.317178	0.0134719	0.0192891
AC011247.3	0.202966	7.66199e-06	1.91984e-05			AC078941.1	-0.392043	0.0145501	0.0207374
AC011286.1	-0.100034	3.70205e-15	2.13175e-14			AC079145.4	0.441845	0.000551362	0.000942431
AC011288.2	0.0602297	0.0251013	0.0383334			AC079250.1	-0.304993	0.00684912	0.0102274
AC011290.5	0.150498	0.00147432	0.002754			AC079305.11	-1.28775	1.2712e-18	6.68142e-18
AC011294.3	0.187338	0.0121211	0.0195492			AC079325.6	-0.406046	0.00530327	0.00804218
AC011322.1	0.198256	0.000203574	0.00042778			AC079610.2	-0.501936	0.0040027	0.00616925
AC011330.5	-0.0316993	4.10328e-10	1.56089e-09			AC079630.4	-1.20523	7.99442e-13	2.87503e-12
AC011516.2	0.128806	0.0170673	0.0268124			AC079767.4	1.71038	2.29567e-19	1.2656e-18
AC011524.1	-0.193754	2.32493e-16	1.46691e-15			AC079776.1	0.480766	0.000135467	0.00024792
AC011526.1	-1.08544	3.11353e-32	6.2944e-31			AC079779.4	-0.869504	9.13643e-10	2.63642e-09
AC011625.1	-0.0396045	8.43896e-07	2.35344e-06			AC079807.2	-0.302837	2.50378e-05	4.94344e-05
AC011738.4	-0.417964	6.28837e-25	7.48323e-24			AC079807.4	-0.647265	2.39603e-09	6.70848e-09
AC011742.3	-0.0444916	0.0181125	0.0283117			AC079922.3	0.644867	5.48966e-12	1.86077e-11
AC011893.3	0.153093	7.03232e-21	6.20049e-20			AC083799.1	0.333561	3.47883e-05	6.75927e-05
AC011997.1	0.0967952	8.19669e-08	2.53646e-07			AC083843.1	-1.51787	4.66922e-28	4.19197e-27
AC012065.5	-0.169625	4.37189e-07	1.25913e-06			AC083843.3	-0.544114	3.13184e-05	6.11782e-05
AC012146.7	0.159223	0.0140232	0.0223803			AC083873.4	-0.56983	3.11937e-08	7.97557e-08
AC012309.5	0.206795	0.000776368	0.00150934			AC083949.1	0.787721	4.35666e-07	1.01131e-06
AC012313.1	-0.0468834	0.0244897	0.0374795			AC084125.4	1.39766	3.48761e-31	3.66392e-30
AC012354.6	0.112331	5.02124e-08	1.58917e-07			AC087163.2	-0.864441	2.40459e-09	6.73041e-09
AC012354.8	0.116456	1.18251e-08	3.96855e-08			AC087380.14	-0.613435	0.000158801	0.00028829
AC012358.4	0.304072	1.09808e-13	5.62859e-13			AC087393.1	-0.339595	0.0223818	0.0310696
AC012358.8	-0.128188	3.21336e-07	9.3664e-07			AC087491.2	-1.3994	7.64131e-10	2.22008e-09
AC012360.4	0.107256	1.27125e-08	4.25383e-08			AC087650.1	-0.32971	0.00356864	0.00553923
AC012360.6	-0.23801	2.71123e-09	9.62262e-09			AC090044.1	-2.81542	9.09169e-41	1.51609e-39
AC012363.13	-0.175	6.73365e-07	1.89691e-06			AC090286.2	0.284417	0.0150894	0.0214637
AC012454.4	-0.0437294	3.03274e-12	1.38076e-11			AC090519.1	-0.635247	4.47585e-06	9.50846e-06
AC012457.2	-0.0598838	8.14031e-10	3.01999e-09			AC090587.2	0.313319	0.0195973	0.0274527
AC012462.1	0.106417	0.00086141	0.0016642			AC090587.5	-0.230667	0.0273642	0.037503
AC012462.2	0.0564513	4.93782e-07	1.41352e-06			AC090602.2	-0.247615	0.0355248	0.0478999
AC012485.2	-0.29071	6.44075e-16	3.93704e-15			AC091492.2	0.307583	0.00817628	0.0120797
AC012487.2	0.136194	9.12762e-06	2.26961e-05			AC091633.2	-0.394673	0.00045478	0.000784634
AC012501.3	0.0531886	0.000349442	0.000711972			AC091633.3	-0.497808	2.40668e-05	4.76331e-05
AC012512.1	0.149576	0.00993508	0.0162932			AC091654.7	0.511424	9.67503e-05	0.000179697
AC012531.25	-0.171549	5.09024e-05	0.000115659			AC091801.1	-1.48802	7.32734e-13	2.64409e-12
AC012613.2	-0.0312962	0.0111396	0.018084			AC092071.1	2.61764	5.0472e-17	2.37863e-16
AC012668.2	0.0248064	0.0011272	0.00214372			AC092155.1	-0.825883	9.80522e-12	3.27212e-11
AC013264.2	0.123107	0.00199249	0.00364536			AC092162.1	0.746845	0.000211492	0.000378519
AC013268.3	0.067237	4.49035e-07	1.29141e-06			AC092171.2	0.393069	0.00347738	0.00540699
AC013271.3	-0.0102054	4.76718e-05	0.000108731			AC092198.1	1.39513	3.28103e-10	9.82208e-10
AC013275.2	-0.190372	4.27798e-11	1.77345e-10			AC092338.5	-0.377021	0.00390027	0.00601978
AC013394.2	-0.274853	0.000189797	0.000400284			AC092431.3	-1.28671	2.16295e-24	1.58547e-23
AC013449.1	0.154552	2.34243e-06	6.22359e-06			AC092535.3	-0.927245	4.4698e-08	1.12851e-07
AC013460.1	0.0293064	0.00766708	0.0128136			AC092569.2	1.30191	1.25948e-16	5.79514e-16
AC013470.6	0.0141721	0.00232502	0.00421626			AC092580.4	-0.922183	1.29928e-07	3.15593e-07
AC013474.4	-0.0941877	5.91116e-11	2.42146e-10			AC092594.1	-0.626186	3.3411e-10	9.99758e-10
AC015849.16	0.169467	1.60585e-17	1.10523e-16			AC092597.3	-0.702606	1.10994e-07	2.71322e-07
AC015849.19	-0.413757	1.0616e-07	3.24817e-07			AC092614.2	-0.889567	1.12623e-12	4.01108e-12
AC015849.2	0.0355061	0.0198194	0.0308014			AC092620.3	0.392929	0.005098	0.0077475
AC015884.1	0.124105	0.00149102	0.00278235			AC092641.2	-1.13	2.26975e-16	1.02639e-15
AC015922.7	-0.213679	3.98614e-10	1.51839e-09			AC092653.5	1.01261	1.26521e-10	3.89268e-10
AC015933.2	0.164121	3.13421e-06	8.19666e-06			AC092667.2	0.548076	0.0100311	0.014639
AC015971.2	-0.173357	3.35956e-12	1.52422e-11			AC092798.2	-0.65441	1.57283e-07	3.79432e-07
AC016292.3	0.482192	6.28443e-20	5.16383e-19			AC092835.2	-0.844943	1.34235e-08	3.53726e-08
AC016700.5	0.362791	5.99266e-09	2.06302e-08			AC092933.3	-0.308045	0.00853902	0.0125793
AC016700.6	0.13424	0.015094	0.0239519			AC093106.7	-0.443373	9.84667e-05	0.000182676
AC016708.2	0.826327	0.00335975	0.00594422			AC093110.3	-2.72723	3.1174e-56	1.18504e-54
AC016722.4	-0.0782867	0.000717308	0.00140177			AC093162.3	0.466538	2.46039e-05	4.86369e-05
AC016723.4	0.071644	0.00547495	0.00936998			AC093162.5	-0.576941	1.45129e-05	2.93426e-05
AC016734.2	0.26959	1.55416e-10	6.14082e-10			AC093323.3	0.579267	4.44115e-16	1.97529e-15
AC016735.3	-0.02816	0.000171447	0.000363773			AC093375.1	-0.990655	0.0018313	0.00294232
AC016745.3	0.0341974	0.0127585	0.0205047			AC093382.1	0.408518	0.00124206	0.00203662
AC016757.3	0.105015	0.00150991	0.00281573			AC093388.3	-0.460968	0.000249815	0.000443683
AC016768.1	-0.0300178	0.000177903	0.000376549			AC093415.2	-0.861119	1.53521e-17	7.47904e-17
AC016831.7	-0.175646	0.00018482	0.00039033			AC093495.4	-1.09981	1.26194e-26	1.04711e-25
AC016907.3	-0.0351123	1.28325e-14	7.11076e-14			AC093585.6	-0.921636	4.00956e-12	1.37341e-11
AC016910.1	-0.0575242	3.63503e-12	1.64429e-11			AC093609.1	-2.86196	4.0821e-59	1.82e-57
AC016995.3	-0.895894	6.69724e-08	2.09038e-07			AC093620.5	0.814095	7.85622e-07	1.78347e-06
AC016999.2	0.106125	0.00109858	0.00209267			AC093627.10	-0.873596	3.22675e-10	9.66276e-10
AC017002.1	0.309238	1.37393e-22	1.38227e-21			AC093627.8	-1.82892	3.45704e-23	2.38518e-22
AC017002.2	0.0538803	0.00161089	0.00299072			AC093627.9	-0.455647	7.86174e-06	1.62962e-05
AC017002.4	0.0623884	1.54321e-10	6.1002e-10			AC093642.3	1.64448	7.10267e-09	1.91613e-08
AC017060.1	0.0767951	0.00904786	0.0149411			AC093668.3	-1.47543	4.80066e-26	3.8649e-25
AC017076.5	0.23083	4.72775e-07	1.35562e-06			AC093677.1	-0.440678	8.07923e-05	0.00015131
AC017083.2	0.037664	0.00248971	0.00449568			AC093724.2	0.726235	1.31944e-08	3.47926e-08
AC018359.1	0.053232	0.00040843	0.000824689			AC093818.1	-0.82569	2.74646e-13	1.02442e-12
AC018462.2	-0.0853271	0.000702558	0.0013745			AC093838.4	0.394767	2.86651e-05	5.6242e-05
AC018463.5	0.0766492	2.41135e-10	9.36135e-10			AC093850.2	5.44061	5.60162e-118	3.86484e-114
AC018464.3	0.0263931	6.82515e-06	1.71938e-05			AC094019.4	-0.769755	2.21196e-05	4.39304e-05
AC018641.7	0.0889597	0.000499444	0.000998011			AC096574.4	-1.27107	1.30628e-18	6.86029e-18
AC018647.3	-0.171298	1.3698e-33	3.03705e-32			AC096670.3	-0.68636	1.24773e-07	3.03685e-07
AC018766.6	-0.117476	0.000195539	0.000411751			AC096772.6	-1.52773	8.40034e-76	1.09717e-73
AC018804.7	-0.222998	0.000244402	0.000507893			AC097468.4	0.801167	0.000191404	0.000344241
AC018816.3	-0.108926	0.0152382	0.0241608			AC097500.2	-0.449432	1.37794e-05	2.79066e-05
AC018890.6	0.168142	6.11222e-05	0.000137398			AC097523.1	0.826257	3.95253e-16	1.76251e-15
AC019050.1	0.142205	4.08898e-11	1.69908e-10			AC097662.2	-0.470767	1.03722e-11	3.45256e-11
AC019100.3	-0.165865	0.001867	0.00343229			AC097721.2	0.671601	4.88365e-11	1.55025e-10
AC019117.1	0.235234	0.000841049	0.00162753			AC097724.3	-2.3951	3.92227e-79	6.40513e-77
AC019118.2	0.0170029	0.0222961	0.0343389			AC098614.2	-0.565435	1.75752e-11	5.75647e-11
AC019118.4	0.0614514	0.0062479	0.0105874			AC098823.3	-0.409384	0.000642667	0.00109019
AC019129.1	0.110657	1.82335e-05	4.37589e-05			AC098824.6	-0.573	3.16971e-06	6.8214e-06
AC019171.1	0.625115	1.29536e-12	6.07593e-12			AC099684.1	0.864748	6.68268e-06	1.39402e-05
AC019172.2	-0.0917334	3.94113e-12	1.77768e-11			AC099850.1	-0.499036	6.40307e-08	1.5979e-07
AC019181.2	-0.173796	0.0010284	0.00196649			AC100830.3	-0.722126	1.95158e-08	5.08109e-08
AC019181.3	-0.161371	1.13543e-05	2.78921e-05			AC100830.5	-0.485073	0.000306861	0.000539996
AC019185.4	0.0332509	0.00275625	0.00494027			AC104134.2	0.489493	9.4317e-05	0.000175354
AC020571.3	-0.439458	9.06687e-11	3.65422e-10			AC104135.4	0.527318	0.014873	0.0211689
AC020907.1	1.33085	8.04467e-27	1.09373e-25			AC104297.1	-0.258302	0.0274733	0.0376357
AC020915.2	0.0244537	7.0216e-06	1.76655e-05			AC104532.4	0.314487	0.00526132	0.00798207
AC020947.2	-0.0183293	0.00187414	0.00344455			AC104534.2	-0.542761	0.000134128	0.000245566
AC021016.8	0.0401588	4.9131e-05	0.000111864			AC104654.2	-0.729799	4.65769e-06	9.88183e-06
AC021188.4	-0.417775	4.19641e-21	3.76191e-20			AC104655.3	-0.547338	0.00210954	0.00336506
AC022007.5	-0.997378	1.393e-21	1.29001e-20			AC104667.3	2.00913	1.62301e-46	3.72026e-45
AC022153.1	-0.0343349	0.000107267	0.000233984			AC104695.3	0.291301	0.0356064	0.0480027
AC022182.1	0.0974676	4.90222e-06	1.25292e-05			AC104841.1	0.275612	0.0172821	0.0244039
AC022182.2	0.0481184	3.85506e-11	1.60609e-10			AC104843.3	-0.527439	1.24141e-05	2.52658e-05
AC022182.3	0.0841038	0.0123992	0.0199678			AC105020.1	-1.49484	2.77853e-28	2.52409e-27
AC022311.1	-0.0492126	0.00216599	0.00394337			AC105053.4	-1.01018	1.11846e-14	4.57022e-14
AC022431.1	-0.207829	0.00694086	0.011683			AC105760.2	-0.51647	8.7546e-11	2.73129e-10
AC022431.2	-0.161793	8.766e-05	0.000193244			AC106786.1	0.572976	0.000264307	0.000468066
AC022431.3	-0.0703683	0.00167059	0.00309383			AC106869.2	1.08699	1.81372e-06	3.99162e-06
AC022596.6	0.20513	0.0193221	0.0300721			AC108004.2	-0.891638	5.25731e-10	1.54929e-09
AC022816.2	0.0230796	8.59825e-05	0.000189667			AC108142.1	-1.7671	1.19363e-17	5.86257e-17
AC023137.2	-0.12127	6.90861e-06	1.73944e-05			AC108448.2	-0.819156	5.06689e-10	1.49509e-09
AC023590.1	0.101427	9.10531e-06	2.26421e-05			AC108463.1	0.269456	0.0203323	0.0283973
AC023593.1	0.455943	3.4047e-16	2.1203e-15			AC108463.2	0.575282	1.20864e-06	2.70136e-06
AC023672.2	-0.154381	0.00383668	0.00673443			AC108488.4	-0.499877	1.35841e-09	3.87327e-09
AC024560.3	0.201167	0.00590028	0.0100371			AC109309.4	-1.27688	3.61191e-10	1.07776e-09
AC024592.9	0.151726	6.20263e-09	2.13228e-08			AC109642.1	-1.12772	3.78162e-20	2.18018e-19
AC024937.2	0.116282	3.2885e-10	1.26201e-09			AC109826.1	0.513543	0.000161627	0.000292997
AC024937.4	0.118609	3.40523e-06	8.87464e-06			AC110619.2	2.66481	1.70813e-23	1.19951e-22
AC024937.6	0.171619	0.000368527	0.000748471			AC111186.1	0.595375	4.94843e-05	9.4654e-05
AC024940.1	0.0541481	1.27702e-05	3.12106e-05			AC111200.7	0.335167	0.00233446	0.00370848
AC025016.1	0.280747	2.19487e-05	5.21361e-05			AC112218.1	-0.648973	8.76272e-30	8.5514e-29
AC025165.8	-0.270058	6.64844e-14	3.47136e-13			AC112229.1	0.778609	7.45615e-06	1.54846e-05
AC025166.1	0.0904051	0.00251704	0.0045412			AC112721.1	2.34489	2.9909e-40	4.86979e-39
AC025171.1	-0.265325	2.12355e-08	6.95699e-08			AC112721.2	2.7785	2.75293e-44	5.57823e-43
AC025335.1	-0.259268	0.000165905	0.000352735			AC114730.3	2.63324	1.39585e-22	9.25804e-22
AC025627.7	-0.0907385	4.94162e-08	1.56533e-07			AC114730.5	1.82654	4.27408e-20	2.45844e-19
AC025811.1	-0.106202	0.000250654	0.000520174			AC114752.2	-0.297261	0.011431	0.0165377
AC025811.2	-0.0580987	1.45876e-05	3.54315e-05			AC115618.1	0.307502	6.80232e-05	0.000128196
AC025811.3	-0.153303	0.00097072	0.00186274			AC116366.6	-0.476988	0.000138111	0.000252474
AC025918.2	-0.107207	9.23986e-06	2.29673e-05			AC116609.2	0.524181	0.0261054	0.0358793
AC026150.6	-0.0185236	4.81055e-05	0.000109679			AC116614.1	-1.9051	5.34727e-19	2.87556e-18
AC026150.8	-0.188066	1.47235e-22	1.47762e-21			AC118344.1	0.496257	7.51491e-05	0.000141096
AC026167.1	-0.0651916	0.0028207	0.00504958			AC122129.1	-0.940413	1.24884e-09	3.57117e-09
AC026188.1	-0.0253448	0.000897473	0.00173075			AC123768.4	-0.857189	1.62492e-14	6.56254e-14
AC026271.5	0.356996	1.45177e-10	5.75371e-10			AC124914.3	-0.335123	0.0365546	0.0492043
AC026471.6	0.0833408	0.000247311	0.000513646			AC124944.3	0.957618	5.76689e-13	2.09911e-12
AC026904.1	-0.0673796	5.56786e-05	0.000125875			AC125232.1	-0.867051	2.19422e-22	1.43873e-21
AC027119.1	-0.0895457	0.023858	0.036571			AC129492.6	-0.529678	0.00376975	0.00583236
AC027307.3	-0.38794	6.20978e-22	5.89905e-21			AC130469.2	-0.641566	1.92381e-06	4.22315e-06
AC027319.1	0.118412	0.00752759	0.0126036			AC131097.3	0.391824	0.0122474	0.0176411
AC027601.1	0.108712	8.76773e-07	2.44181e-06			AC131097.4	-1.22158	4.43111e-10	1.31396e-09
AC027612.4	-0.014341	0.0128669	0.0206644			AC132008.1	-1.25859	3.3317e-18	1.70369e-17
AC027612.6	-0.139827	0.00210641	0.00384354			AC132192.1	1.10959	3.92772e-19	2.13129e-18
AC027763.2	-0.214407	1.06678e-07	3.26265e-07			AC135048.13	0.561375	2.88429e-06	6.2295e-06
AC034220.3	-0.64621	2.40706e-45	1.21017e-43			AC135050.5	1.13034	2.64092e-19	1.45072e-18
AC034228.7	0.0168576	5.27696e-08	1.66576e-07			AC136289.1	-1.33615	6.57091e-25	4.95475e-24
AC034236.2	-0.822081	1.42805e-20	1.22795e-19			AC137932.1	-0.312375	0.0041397	0.00636902
AC034243.1	-0.217397	0.00215823	0.00393043			AC137932.5	-0.837029	2.58253e-09	7.21457e-09
AC046143.3	0.103773	0.01032	0.0168616			AC137932.6	1.3854	1.17493e-24	8.73067e-24
AC051649.12	-0.0575826	5.12789e-06	1.30762e-05			AC138035.2	-0.39982	0.0022258	0.00354315
AC051649.6	-0.0392698	0.00180577	0.00332829			AC138123.2	-0.592644	4.16838e-07	9.68912e-07
AC053503.4	0.10262	4.08347e-05	9.39306e-05			AC138655.4	-1.12517	2.12231e-15	9.0598e-15
AC053503.6	-0.106185	0.00628771	0.0106495			AC139100.2	0.564961	6.65021e-05	0.000125449
AC062017.1	-0.282515	1.28518e-06	3.50923e-06			AC139100.3	1.03511	6.09851e-09	1.65558e-08
AC063976.7	-0.0416995	0.0116173	0.0187941			AC139530.1	-0.641203	3.41389e-07	8.01162e-07
AC064850.4	0.0821236	5.33665e-14	2.80856e-13			AC139887.4	0.389852	0.00166214	0.00268381
AC064853.3	-0.0314607	8.05612e-07	2.2505e-06			AC141586.5	0.547875	1.05385e-13	4.04396e-13
AC064875.2	-0.180346	0.00091826	0.00176822			AC141928.1	-0.782365	0.000348815	0.000610012
AC066612.1	-0.178943	0.000712933	0.00139382			AC141930.2	1.61405	1.84302e-23	1.29194e-22
AC067718.1	-0.0816763	0.00477025	0.00824055			AC142381.1	-0.813121	8.18771e-05	0.000153176
AC067945.3	0.0608695	0.000257789	0.000534312			AC142528.1	-0.803452	1.34268e-10	4.12091e-10
AC067956.1	0.0500638	0.0134631	0.0215336			AC144449.1	-0.601873	4.05175e-08	1.0271e-07
AC067960.1	0.0665432	0.0178568	0.0279492			AC144450.1	1.64529	5.35464e-19	2.87897e-18
AC067968.3	0.0109201	0.0224982	0.0346308			AC144450.2	1.74472	9.24499e-18	4.57e-17
AC068057.1	-0.235833	6.44668e-22	6.11499e-21			AC144530.1	-0.266029	0.00852705	0.012565
AC068196.1	0.0583862	2.44099e-07	7.21549e-07			AC144831.1	-0.987027	3.33178e-11	1.07081e-10
AC068282.3	0.241623	1.68881e-07	5.0577e-07			AC145110.1	1.64282	6.17039e-17	2.89462e-16
AC068580.5	0.461021	1.73838e-12	8.07493e-12			AC145343.2	0.331548	0.020423	0.0285067
AC068580.6	0.418848	9.42491e-14	4.85772e-13			AC145676.2	-0.484683	0.00289026	0.00454168
AC068580.7	0.480071	9.0151e-11	3.63496e-10			AC147651.3	-0.915377	2.47913e-08	6.40029e-08
AC068587.2	-0.72935	2.8489e-20	2.39987e-19			AC147651.4	0.600597	5.07796e-08	1.27675e-07
AC068641.1	-0.510932	5.45163e-10	2.05196e-09			AC156455.1	-0.354444	0.00321293	0.00501529
AC068831.6	0.133981	3.59381e-18	2.59292e-17			AC159540.1	0.931755	5.58412e-11	1.76591e-10
AC068858.1	0.0337468	5.57415e-06	1.41597e-05			AC211429.1	-0.112038	0.01722	0.0243275
AC069277.2	0.0446968	0.00162415	0.0030138			AC226118.1	-2.77899	5.11301e-39	7.86998e-38
AC069282.6	-0.365567	1.50186e-07	4.52309e-07			AC231657.1	0.9555	1.9847e-17	9.60272e-17
AC069294.1	-0.185536	4.34474e-05	9.96075e-05			AC241585.3	-0.460836	0.00753714	0.0111827
AC069513.4	0.160909	4.33352e-15	2.47931e-14			AC241952.1	-0.487215	0.00044937	0.000775689
AC072052.7	-0.413365	1.37113e-06	3.73219e-06			AC242842.2	-0.320522	0.000166375	0.000301247
AC072061.2	0.0416539	0.00329	0.00582788			AC242988.1	0.413873	9.14406e-06	1.88411e-05
AC072062.1	0.183484	1.92819e-05	4.61384e-05			AC243547.1	-1.23418	6.09477e-42	1.09508e-40
AC073043.1	0.0257722	3.21811e-05	7.50193e-05			AC244102.1	0.931678	0.000645379	0.00109445
AC073046.25	0.504564	2.60153e-07	7.66022e-07			AC244230.1	-3.24185	1.55153e-32	1.73356e-31
AC073069.2	-0.0325146	0.0290515	0.0438424			AC244394.1	-0.36097	3.14165e-06	6.76419e-06
AC073072.5	-0.405034	1.20244e-16	7.75459e-16			AC244517.1	-1.05809	8.64821e-12	2.90074e-11
AC073128.10	0.0234069	0.000212976	0.000446352			AC253572.1	-0.778854	1.03909e-07	2.54385e-07
AC073130.3	-0.472741	1.26138e-23	1.36675e-22			ACA59	-0.76038	2.31513e-08	5.99484e-08
AC073133.1	-0.0354746	0.000341649	0.000696951			ACADM	-0.642858	5.54891e-17	2.60884e-16
AC073133.2	-0.0701382	0.00862043	0.0142926			ACN9	-0.685552	1.24519e-07	3.0312e-07
AC073150.6	0.101592	0.00598312	0.01017			ACOT13	0.159832	0.00933394	0.0136729
AC073215.1	-0.11506	0.00572348	0.00976049			ACOT6	0.408834	0.019265	0.0270215
AC073236.3	0.233236	0.0115734	0.018729			ACP1	0.442919	5.71716e-21	3.46546e-20
AC073254.1	-0.0524405	0.0185017	0.0288817			ACPL2	0.276611	5.22781e-05	9.9749e-05
AC073257.2	-0.662694	1.8255e-11	7.81347e-11			ACTA2-AS1	-2.75315	1.14628e-48	2.95104e-47
AC073283.7	0.0764717	0.00107414	0.0020489			ACTC1	-0.773676	0.000636688	0.00108058
AC073316.1	-0.159293	2.93636e-07	8.59752e-07			ACTG1P1	0.341928	0.00230089	0.00365762
AC073316.2	-0.0291729	0.0187396	0.0292267			ACTG1P10	-0.332612	0.0172239	0.0243317
AC073325.2	0.112113	0.0183026	0.0285905			ACTG1P12	-0.249652	0.0257249	0.0353951
AC073342.1	0.055945	7.60017e-06	1.90527e-05			ACTG1P3	0.394338	0.000542571	0.000928209
AC073342.12	0.0939262	2.11959e-10	8.27626e-10			ACTL10	1.16404	8.49713e-19	4.51143e-18
AC073410.1	0.136231	6.04149e-05	0.000135917			ACTN1-AS1	-0.668251	2.36797e-06	5.15226e-06
AC073415.2	0.221707	0.00760786	0.0127228			ACTN4P1	-0.238429	0.0333672	0.0451472
AC073464.10	-0.01011	0.0103681	0.0169379			ACVR1	-0.483685	1.02882e-15	4.47353e-15
AC073465.3	0.0312079	0.00296361	0.00528983			ACVR2B-AS1	-0.947429	3.07238e-19	1.67805e-18
AC073621.2	-0.127888	9.43785e-15	5.27784e-14			AD000684.2	0.638966	2.06557e-06	4.51601e-06
AC073635.5	-0.207762	3.76976e-07	1.09245e-06			ADAM1B	-0.415008	0.000195144	0.000350533
AC073636.1	-0.0894039	4.1946e-12	1.88641e-11			ADAM20P1	-0.283688	0.0368515	0.0495627
AC073850.6	-1.72475	9.69387e-34	2.17441e-32			ADAMTS19-AS1	1.34211	3.05107e-09	8.47886e-09
AC073869.2	0.011325	0.0234188	0.0359447			ADAMTS7P3	0.600393	2.06272e-05	4.11024e-05
AC073869.20	0.0291861	0.000248294	0.000515568			ADAMTS9-AS1	-3.17477	4.49489e-54	1.53908e-52
AC073934.6	0.0251448	0.00313035	0.00556375			ADAMTS9-AS2	-3.70644	7.36517e-78	1.08119e-75
AC074091.13	0.0964857	1.17293e-13	5.99876e-13			ADAMTSL4-AS1	-0.780992	1.8172e-08	4.74241e-08
AC074117.10	0.53504	2.33793e-20	1.98365e-19			ADC	0.713698	1.5663e-17	7.62512e-17
AC074212.3	0.0194034	1.66789e-06	4.50031e-06			ADCK4	0.517727	4.01182e-15	1.68649e-14
AC074212.5	0.157953	0.000790677	0.00153536			ADCYAP1	-0.638223	0.0185368	0.026073
AC074286.1	-0.221266	9.01574e-30	1.52211e-28			ADH5P4	-0.746658	9.6154e-11	2.99004e-10
AC074289.1	-0.433583	1.50892e-11	6.5058e-11			ADIRF-AS1	-1.34364	6.40885e-27	5.3793e-26
AC074363.1	-0.113808	2.43019e-08	7.91956e-08			ADORA2B	-1.12549	1.5929e-14	6.4374e-14
AC074366.3	0.0136298	0.00183767	0.00338264			ADPGK-AS1	-0.266267	0.0171234	0.0242022
AC074389.5	-0.301879	6.67953e-07	1.88254e-06			ADRB1	-2.64574	8.02166e-22	5.09509e-21
AC074389.9	0.621143	6.5714e-09	2.25459e-08			AE000661.37	0.988732	9.31145e-09	2.48816e-08
AC074391.1	-0.0313786	4.39897e-09	1.53232e-08			AE000661.50	0.679453	6.06129e-06	1.27035e-05
AC078819.1	-0.153633	1.16724e-06	3.20111e-06			AE000662.93	0.542311	0.00152289	0.00247068
AC078883.3	0.0857711	0.00121322	0.00229521			AES	0.23547	0.00135257	0.00220838
AC078899.1	0.0783329	3.27355e-07	9.53424e-07			AF001548.5	0.90589	2.28524e-18	1.18127e-17
AC078941.1	0.0227303	0.0147525	0.0234509			AF001548.6	-1.11971	1.75432e-15	7.52496e-15
AC078993.1	-0.0924182	0.00617771	0.0104739			AF015262.2	1.55445	1.25997e-12	4.47353e-12
AC079135.1	0.0324315	0.0113778	0.0184402			AF064858.11	-1.30079	6.684e-24	4.79379e-23
AC079145.4	0.31397	1.09424e-07	3.34297e-07			AF064858.8	-1.16946	7.41633e-18	3.69251e-17
AC079199.2	0.045804	0.0157325	0.0248882			AF127577.12	-0.578846	1.35337e-06	3.01092e-06
AC079250.1	0.195979	0.00418153	0.00729441			AF127936.5	-0.342716	0.0130348	0.018705
AC079305.10	0.144931	4.76175e-06	1.2192e-05			AF131215.2	-2.17586	5.52356e-27	4.66746e-26
AC079305.11	-0.177526	9.76282e-23	9.89585e-22			AF131215.8	-2.22635	2.35092e-31	2.49349e-30
AC079305.8	-0.045297	0.0053013	0.00909629			AF131215.9	-1.81424	3.35435e-23	2.31607e-22
AC079325.6	0.108716	0.00292899	0.0052311			AF131216.6	-0.689921	1.41441e-06	3.14316e-06
AC079341.1	0.00595067	0.00403423	0.00705535			AF131217.1	-0.665013	0.000213836	0.000382415
AC079354.3	-0.0393934	0.0032155	0.00570591			AF146191.4	-1.3753	7.65029e-24	5.46834e-23
AC079354.5	0.212894	7.67434e-15	4.31948e-14			AF165138.7	0.624497	2.41944e-06	5.25844e-06
AC079630.4	-0.289088	2.00806e-31	3.82014e-30			AF178030.2	0.863512	9.2314e-06	1.9014e-05
AC079741.2	0.0588879	0.00842002	0.0139784			AF186192.5	-0.941773	3.938e-06	8.39819e-06
AC079753.5	0.040837	0.000118103	0.000256119			AF186192.6	-0.521694	0.00206355	0.00329534
AC079767.4	0.734909	1.42642e-14	7.87894e-14			AF230666.2	0.33998	0.00152025	0.00246668
AC079776.2	-1.01545	1.2384e-25	1.54429e-24			AGA	0.235242	0.000318176	0.000559122
AC079776.3	-0.0453062	4.51563e-14	2.38959e-13			AGAP10	-0.504045	2.45549e-05	4.85504e-05
AC079780.3	0.0723983	0.00025498	0.00052873			AGAP1-IT1	2.20748	6.55979e-37	9.02479e-36
AC079781.1	-0.0664127	0.0283208	0.0428159			AGBL5-AS1	-0.259467	0.0336383	0.0454917
AC079781.8	-0.108502	1.45963e-07	4.40063e-07			AGBL5-IT1	-0.590568	3.02957e-08	7.75748e-08
AC079807.2	0.0843641	0.0313427	0.0469792			AGGF1P1	-0.374924	0.0204094	0.0284905
AC079807.3	0.0881437	0.0331423	0.049459			AGGF1P2	-0.438561	0.015953	0.0226235
AC079922.2	0.292982	0.00576832	0.00983053			AGPAT2	-1.01455	8.70345e-16	3.80481e-15
AC079922.3	0.41749	2.48161e-19	1.94736e-18			AGPAT9	-1.8404	1.43365e-38	2.14799e-37
AC079988.3	0.0717521	9.70691e-06	2.40495e-05			AGR3	3.06121	3.50099e-25	2.68763e-24
AC083799.1	0.314142	4.00035e-05	9.21523e-05			AHSA2	-0.279605	0.00605155	0.00910055
AC083843.1	-0.63753	1.20212e-12	5.65383e-12			AJ006998.2	-0.524926	0.00104111	0.001723
AC083843.3	-0.0729704	4.22399e-05	9.70099e-05			AK3P3	-1.26104	3.13694e-21	1.92599e-20
AC083864.3	-0.131483	1.40756e-09	5.12083e-09			AK4P1	-1.13574	9.63599e-16	4.20051e-15
AC083873.4	-0.0579438	0.000786094	0.00152716			AK4P3	-0.381134	0.00253998	0.00401825
AC083899.3	0.181118	5.15759e-11	2.12135e-10			AK4P4	0.258163	0.0244869	0.0338047
AC083900.1	-0.0682091	0.000745375	0.00145288			AKIP1	0.391455	1.16099e-11	3.84878e-11
AC083949.1	0.183111	6.98177e-11	2.84151e-10			AKIRIN2	-0.361203	8.69586e-12	2.91531e-11
AC084018.1	-0.209106	0.00443261	0.00769852			AKR1C3	-2.63013	3.89379e-54	1.33991e-52
AC084082.3	-0.0877326	4.827e-06	1.2347e-05			AKR1C7P	0.389396	0.00838711	0.0123726
AC084125.4	0.398394	3.10106e-16	1.93717e-15			AKT1S1	0.529055	2.68172e-15	1.13967e-14
AC084219.3	-0.0516588	0.00171428	0.00316912			AL009178.1	-0.612387	7.87967e-07	1.78864e-06
AC084219.4	0.118056	8.52542e-08	2.63256e-07			AL022341.3	0.970787	9.55935e-12	3.19355e-11
AC084809.2	-0.165816	2.78448e-05	6.53536e-05			AL022344.7	-1.54886	3.51143e-26	2.84439e-25
AC087163.2	-0.322118	4.01296e-11	1.66844e-10			AL022345.7	-0.816575	1.02464e-10	3.17908e-10
AC087380.14	-0.081425	7.38732e-05	0.000164398			AL022476.2	-0.267148	0.00359113	0.00557162
AC090044.1	-0.188537	1.58016e-20	1.35618e-19			AL031663.2	0.927073	9.22812e-12	3.08551e-11
AC090044.2	-0.483784	3.45151e-19	2.68075e-18			AL031666.2	-0.85244	4.80407e-09	1.31596e-08
AC090283.3	-0.204927	6.70712e-10	2.50743e-09			AL035610.1	-4.50363	3.11676e-72	3.09411e-70
AC090286.2	0.0595679	0.0158919	0.0251174			AL121578.2	1.66545	3.39372e-13	1.25769e-12
AC090505.5	0.0239126	4.04352e-05	9.30527e-05			AL132709.5	-1.53088	2.98213e-23	2.06578e-22
AC090505.6	0.0313356	4.64331e-10	1.75879e-09			AL133245.2	-0.600423	3.32446e-06	7.13663e-06
AC090519.1	-0.160505	6.13042e-06	1.55079e-05			AL133493.2	-0.385762	0.0302551	0.0411848
AC090587.2	-0.131503	8.45291e-05	0.00018671			AL139147.1	0.459383	0.00749139	0.011119
AC090587.4	0.0873346	0.0110562	0.0179566			AL162151.3	-0.754424	1.81967e-10	5.54664e-10
AC090616.2	-0.265258	1.68157e-06	4.5332e-06			AL163636.6	-1.39295	1.5391e-23	1.08412e-22
AC090804.1	0.105	7.96644e-08	2.46835e-07			AL163953.3	-0.464264	4.6765e-05	8.97387e-05
AC090945.1	0.249714	8.03123e-13	3.83166e-12			AL359878.1	0.269269	0.0331055	0.0448152
AC091177.1	-0.0333963	0.0265513	0.040377			AL360004.1	0.713401	8.00184e-08	1.98023e-07
AC091493.2	0.0779665	0.00348818	0.0061568			AL365202.1	-0.389396	0.00317507	0.00496101
AC091654.7	0.12624	1.91129e-10	7.49668e-10			AL391421.1	2.59183	1.55768e-19	8.66886e-19
AC091729.8	0.0674143	0.00116441	0.00220963			AL450992.2	-0.690857	2.08761e-09	5.87358e-09
AC091801.1	-0.122454	0.0140646	0.0224396			AL589743.1	-0.440892	0.0057815	0.00872091
AC091814.2	0.0374658	0.0157752	0.0249503			AL590708.2	0.765356	1.64504e-07	3.96262e-07
AC091814.3	0.0286314	0.000598184	0.00118216			AL590762.11	-0.332763	0.0218377	0.0303692
AC092117.1	0.128946	4.44892e-06	1.14232e-05			AL590762.6	0.371042	0.00232538	0.00369485
AC092155.1	-0.163041	8.45009e-05	0.000186659			AL590762.7	0.449098	0.000164851	0.000298547
AC092155.4	-0.167719	8.81615e-27	1.19505e-25			AL591806.1	0.258622	0.0166565	0.0235773
AC092162.1	-0.0389158	2.78885e-09	9.8827e-09			AL592494.5	-1.29912	1.50221e-17	7.32343e-17
AC092162.2	-0.042859	1.71345e-07	5.12894e-07			AL645728.1	-0.369856	2.32228e-05	4.60188e-05
AC092168.2	0.102801	0.0260516	0.0396717			AL672294.1	0.717843	5.18372e-09	1.41546e-08
AC092171.4	0.308442	1.62949e-05	3.93239e-05			AL773604.8	0.306379	0.0140515	0.02007
AC092198.1	0.21254	3.69087e-10	1.41048e-09			AL928768.3	-1.21036	2.22899e-08	5.77721e-08
AC092295.4	0.0396763	0.00270982	0.00486303			ALB	-3.17633	8.46564e-20	4.77878e-19
AC092295.7	0.253392	1.13067e-05	2.77791e-05			ALDH7A1	-0.625116	3.05638e-18	1.56726e-17
AC092338.5	-0.150788	2.48197e-09	8.84252e-09			ALDH7A1P1	-0.471194	3.45254e-05	6.7115e-05
AC092431.3	-0.209086	1.34037e-12	6.28137e-12			ALDOAP1	0.399874	0.000926793	0.0015438
AC092484.1	0.53188	5.15297e-10	1.94376e-09			ALDOAP2	0.627655	9.41151e-06	1.93618e-05
AC092573.2	0.085306	5.10777e-09	1.76959e-08			ALG13-AS1	-0.334095	0.0257559	0.035436
AC092574.1	-0.196596	0.000212456	0.000445392			ALG1L10P	-0.271623	0.0354396	0.0477897
AC092574.2	-0.224161	0.00029704	0.000611322			ALG1L12P	-0.582376	0.000136706	0.000250036
AC092580.3	0.0778331	4.01545e-05	9.24649e-05			ALG1L15P	0.418402	0.000122385	0.000224812
AC092580.4	0.35784	0.00219232	0.00398693			ALG1L3P	0.511982	0.00259878	0.00410704
AC092594.1	-0.142344	3.61034e-08	1.15751e-07			ALG1L6P	-0.640418	7.22957e-08	1.79685e-07
AC092597.3	-0.119684	7.29531e-10	2.71729e-09			ALG1L9P	0.906254	1.78946e-18	9.31451e-18
AC092614.2	-0.0594491	0.0314635	0.0471428			ALKBH3	-0.4004	2.53733e-05	5.00644e-05
AC092620.2	-0.0285373	0.00390395	0.00684208			ALKBH3-AS1	-0.510908	1.85914e-05	3.71855e-05
AC092620.3	-0.0355987	0.00275571	0.00493955			ALKBH4	0.354879	2.10542e-07	5.02685e-07
AC092641.2	-0.165898	1.86005e-08	6.12732e-08			ALKBH6	0.627547	3.82153e-12	1.31194e-11
AC092652.1	0.0712658	0.000723846	0.00141402			ALOX12P2	-1.06512	6.18301e-05	0.00011706
AC092653.5	0.256221	1.04193e-06	2.8765e-06			AMD1P1	-0.722737	9.9712e-08	2.44522e-07
AC092667.2	-0.346942	1.90897e-24	2.20126e-23			AMIGO2	-1.46819	3.59776e-16	1.60821e-15
AC092798.2	-0.120196	8.32439e-05	0.000184105			AMIGO3	0.468267	3.66859e-05	7.10645e-05
AC092835.2	0.113577	0.0166439	0.026197			ANAPC13	0.170163	0.00204484	0.00326697
AC093063.2	0.233356	1.19037e-09	4.35372e-09			ANAPC1P1	-0.353079	0.00753585	0.0111815
AC093106.5	0.0481459	0.000354266	0.000721154			ANAPC2	0.302777	5.23378e-06	1.10489e-05
AC093107.7	0.0915185	2.57141e-06	6.80198e-06			ANG	-0.603475	7.7997e-07	1.77136e-06
AC093110.3	-0.986134	1.45753e-24	1.69194e-23			ANKRD13C	-0.102534	0.0365807	0.0492346
AC093162.1	-0.142781	0.000556006	0.00110372			ANKRD26P4	-0.293152	0.0279589	0.0382761
AC093162.3	0.405396	3.11813e-10	1.19878e-09			ANKRD29	-2.74534	7.59537e-55	2.69085e-53
AC093326.1	-0.108905	0.0025061	0.00452304			ANKRD30BP1	1.54533	3.75055e-08	9.53021e-08
AC093375.1	-0.181023	0.000158751	0.000338411			ANKRD45	-1.35727	1.60114e-21	9.99281e-21
AC093382.1	-0.274388	8.46144e-11	3.41967e-10			ANKRD62P1	-0.738623	0.0032666	0.00509447
AC093388.3	0.337044	1.84345e-13	9.27704e-13			ANKRD62P1-PARP4P3	-0.776432	0.00171548	0.00276509
AC093390.1	-0.0256384	0.0172676	0.0271085			ANKS3	0.560005	3.42723e-09	9.48882e-09
AC093391.2	0.110341	7.16033e-07	2.01229e-06			ANO1-AS2	-0.979737	1.89131e-09	5.33923e-09
AC093415.2	-0.367321	2.91428e-21	2.64045e-20			ANP32AP1	0.545766	7.93219e-06	1.64373e-05
AC093495.4	-0.42351	7.46668e-31	1.3608e-29			ANTXR2	-1.60095	1.7868e-50	5.13134e-49
AC093510.1	-0.0574264	2.70915e-06	7.14637e-06			ANTXRLP1	-0.528245	0.00171884	0.00277002
AC093585.6	-0.0996812	0.00109941	0.00209403			ANXA2	-0.203032	0.0106451	0.0154638
AC093590.1	-0.00839357	0.00313951	0.00557921			ANXA2P1	-0.40104	0.000109386	0.000201941
AC093609.1	-0.609259	3.57613e-37	1.02397e-35			ANXA2P2	-0.241051	0.0090194	0.0132431
AC093620.5	0.304308	4.40226e-07	1.26728e-06			ANXA8	-2.51159	3.20434e-18	1.64039e-17
AC093627.10	0.32476	1.52406e-05	3.6919e-05			AOX2P	1.17469	4.04178e-12	1.38376e-11
AC093627.12	0.0469923	0.000677623	0.00132899			AOX3P	-0.502813	0.000847346	0.00141728
AC093627.7	0.403816	1.68347e-09	6.08634e-09			AP000251.3	1.94311	1.86158e-31	1.98746e-30
AC093627.8	-0.389143	9.20032e-13	4.3677e-12			AP000253.1	-0.305103	0.0199567	0.0279052
AC093642.3	-0.315093	1.03696e-06	2.86386e-06			AP000255.6	-0.672684	9.82638e-09	2.61942e-08
AC093642.4	0.0497345	0.00263626	0.00473989			AP000266.7	-1.11476	6.22393e-18	3.12419e-17
AC093642.5	-0.226628	5.96907e-05	0.000134412			AP000275.65	0.31509	0.0208746	0.0291046
AC093668.3	-1.2467	3.17029e-27	4.43087e-26			AP000281.1	-0.268029	0.0169862	0.0240218
AC093673.5	0.342778	0.000180004	0.000380775			AP000295.9	-0.533173	3.19417e-05	6.23032e-05
AC093822.1	-0.18394	0.00417381	0.00728269			AP000318.2	-0.349244	0.00689087	0.0102858
AC093843.1	0.0544648	0.0118827	0.019192			AP000320.7	-0.435687	0.000548764	0.000938513
AC093850.1	0.0454848	0.000188192	0.000397037			AP000330.8	0.980181	3.09015e-10	9.26473e-10
AC093850.2	2.09403	3.70278e-46	1.96744e-44			AP000344.3	-1.25811	3.43931e-09	9.52134e-09
AC093899.3	-0.0784826	3.69435e-05	8.54272e-05			AP000344.4	-1.08863	4.84711e-07	1.12073e-06
AC093901.1	0.353235	1.44724e-13	7.33786e-13			AP000347.2	-0.611093	3.00206e-08	7.6922e-08
AC094019.4	-0.499761	4.64724e-22	4.45849e-21			AP000350.4	-0.519478	0.000123614	0.000226994
AC096574.4	-0.0800335	3.69838e-18	2.66468e-17			AP000350.5	-1.44508	6.62769e-08	1.65172e-07
AC096574.5	-0.039252	0.0267188	0.0406097			AP000350.6	-0.565904	0.000560745	0.000957579
AC096582.7	-0.12475	0.0115849	0.0187467			AP000350.8	-0.442299	0.00353382	0.00548887
AC096669.3	-0.0770981	1.00527e-10	4.03681e-10			AP000354.2	-0.322	0.0103569	0.0150833
AC096670.3	-0.0585633	5.7398e-14	3.01203e-13			AP000354.4	-0.58524	4.77532e-06	1.01182e-05
AC096772.6	-0.839949	9.03156e-33	1.8985e-31			AP000357.4	0.328998	0.00840276	0.0123937
AC097468.4	0.0361599	0.0327784	0.048958			AP000438.2	-0.700627	0.000461377	0.00079547
AC097495.2	-0.0591789	6.61759e-06	1.66951e-05			AP000439.3	2.30754	2.43202e-14	9.71472e-14
AC097533.1	-0.0138687	0.0275466	0.0417651			AP000442.1	-0.243462	0.00245184	0.00388617
AC097635.4	0.027627	0.00817966	0.0136054			AP000442.4	-1.32737	2.36919e-27	2.03818e-26
AC097662.2	-0.0466078	0.00604482	0.0102672			AP000473.5	-2.13157	4.64348e-35	5.88928e-34
AC097711.1	0.0129532	2.75147e-07	8.08277e-07			AP000473.8	-2.60385	3.10661e-41	5.33518e-40
AC097713.3	-1.38012	5.96784e-30	1.01648e-28			AP000476.1	-0.346876	0.0077676	0.0115073
AC097713.4	-0.119264	3.09352e-05	7.22951e-05			AP000487.5	0.440356	0.000110812	0.000204452
AC097713.5	0.0443625	0.00531218	0.00911281			AP000487.6	0.376928	0.00348304	0.00541488
AC097724.3	-0.804481	3.27451e-18	2.37005e-17			AP000593.7	0.327385	0.021863	0.0304028
AC098614.2	-0.244122	0.000295151	0.000607742			AP000620.1	0.418862	0.000240978	0.00042865
AC098617.1	-0.117125	7.12412e-11	2.89815e-10			AP000640.10	-0.689573	1.2428e-10	3.82627e-10
AC098820.3	0.123138	0.00256298	0.0046177			AP000662.4	-2.3715	9.86092e-55	3.48007e-53
AC098820.4	-0.0458964	0.0287285	0.0433766			AP000662.9	0.45789	0.000160358	0.00029085
AC098823.3	-0.0171114	0.00280363	0.00502124			AP000688.8	-1.05682	5.83557e-07	1.34074e-06
AC098824.6	-0.0653696	1.50413e-05	3.64797e-05			AP000692.10	0.440857	0.00238442	0.00378387
AC098826.5	0.0305347	0.00938554	0.0154546			AP000692.9	0.563805	7.16135e-06	1.49027e-05
AC098828.2	0.0812849	7.7795e-06	1.94743e-05			AP000695.4	1.4538	2.97834e-25	2.29727e-24
AC098828.3	0.0929554	2.59347e-06	6.85859e-06			AP000695.6	1.24507	2.87189e-16	1.29107e-15
AC099684.1	-0.0468072	1.96832e-11	8.40209e-11			AP000704.5	0.865421	7.43664e-15	3.0701e-14
AC099754.1	-0.096315	3.24212e-13	1.60129e-12			AP000925.2	-0.898899	1.87314e-12	6.57363e-12
AC100802.3	-0.0303444	1.0869e-06	2.99368e-06			AP001046.5	-1.03625	1.55414e-13	5.88842e-13
AC100830.3	-0.0691635	0.000622197	0.00122717			AP001053.11	-0.463319	0.00733744	0.0109081
AC100830.5	-0.299058	1.61779e-07	4.85694e-07			AP001062.9	0.392776	0.00107086	0.00176947
AC102953.4	-0.0944096	4.07706e-06	1.0524e-05			AP001065.15	-0.882806	5.73402e-08	1.436e-07
AC103563.2	0.240108	0.0193645	0.0301305			AP001065.2	0.702151	0.0132345	0.0189748
AC103563.8	0.0536835	0.00289606	0.00517661			AP001065.7	-1.40922	6.4879e-17	3.03737e-16
AC103563.9	0.0193538	0.0151956	0.0240996			AP001189.4	-1.69666	1.83171e-24	1.3466e-23
AC104024.1	-0.0323	0.000384849	0.000779622			AP001258.4	0.308569	1.3411e-05	2.71865e-05
AC104134.2	0.0383441	1.91497e-05	4.5843e-05			AP001350.1	-0.473593	0.00168701	0.00272079
AC104135.4	0.116318	3.17374e-05	7.40513e-05			AP001412.1	1.05823	1.76219e-15	7.55638e-15
AC104395.2	-0.012722	0.0122882	0.0197977			AP001434.2	1.86761	7.60301e-25	5.71115e-24
AC104451.2	0.166671	5.87583e-07	1.66582e-06			AP001437.1	0.62592	6.70893e-07	1.53323e-06
AC104472.1	0.0808779	2.62849e-13	1.3069e-12			AP001469.5	-0.55707	0.000402422	0.000698801
AC104532.3	0.0377024	0.0234412	0.0359761			AP001471.1	-0.466551	0.000322926	0.00056718
AC104534.2	-0.252856	0.0061204	0.0103835			AP001476.2	-0.879385	1.84905e-10	5.63247e-10
AC104534.3	0.00938684	0.00304684	0.0054259			AP001505.9	-2.17086	1.66914e-40	2.74686e-39
AC104600.1	-0.0236598	0.00679338	0.0114527			AP001596.6	-2.08771	2.33092e-39	3.64469e-38
AC104634.3	-0.066173	2.51575e-07	7.42361e-07			AP001597.1	-1.59731	2.58599e-22	1.68919e-21
AC104651.1	0.377468	1.64224e-17	1.12964e-16			AP001604.3	-1.02057	1.74249e-09	4.93172e-09
AC104653.1	0.0848684	0.015528	0.0245903			AP001610.5	0.629199	0.00161937	0.0026195
AC104655.2	0.142579	0.000695378	0.00136162			AP001619.2	0.3551	0.00809509	0.0119668
AC104655.3	-0.0971184	0.0196485	0.0305475			AP001619.3	0.351747	0.00479252	0.0073082
AC104695.3	0.0682805	4.83839e-05	0.000110266			AP001626.1	-1.75476	1.40694e-13	5.34684e-13
AC104699.1	0.287196	3.64685e-05	8.43556e-05			AP001626.2	-0.984939	5.58406e-13	2.03605e-12
AC104801.1	0.0910754	7.09506e-08	2.21057e-07			AP001627.1	-3.10642	8.14876e-66	5.44526e-64
AC104809.4	-0.0281529	0.000876077	0.00169155			AP001628.6	0.391059	0.00424826	0.00652658
AC104820.2	0.0486559	0.00016026	0.000341348			AP001630.5	0.346761	0.00551351	0.00833946
AC105020.1	-0.352832	3.9744e-17	2.6547e-16			AP001816.1	-0.614578	1.86485e-06	4.09925e-06
AC105049.1	0.192226	1.0557e-05	2.60197e-05			AP002495.1	0.349239	0.00915654	0.0134288
AC105053.3	-0.0783148	2.8209e-23	2.97517e-22			AP002954.3	-1.41647	2.62657e-21	1.61876e-20
AC105053.4	-0.150037	1.50031e-11	6.47099e-11			AP002954.4	0.543932	0.000602939	0.0010257
AC105339.1	-0.00944781	0.00243961	0.00441069			AP003068.23	0.332838	0.00595751	0.00896978
AC105398.3	-0.170104	1.50017e-09	5.44525e-09			AP003774.4	-0.282322	0.0152415	0.0216687
AC105399.2	0.0560736	0.00855783	0.0141956			AP003774.6	-0.314245	0.0156258	0.0221878
AC105760.2	-0.221222	1.63916e-22	1.63692e-21			AP004372.1	1.69937	7.39796e-07	1.68401e-06
AC106801.1	0.0137193	0.00225829	0.00410076			AP006222.2	-0.608637	0.000194896	0.000350133
AC107057.1	0.373283	3.04517e-09	1.07596e-08			AP006621.5	-0.290284	0.00449676	0.00688369
AC107057.2	0.080307	1.18956e-09	4.35118e-09			AP006621.8	0.543729	0.00123911	0.00203215
AC107072.2	-0.370679	6.7597e-11	2.75605e-10			AP006621.9	1.19448	5.16113e-12	1.75328e-11
AC107081.5	0.123142	0.000107878	0.000235218			AP1S3	0.933957	1.35929e-20	8.04495e-20
AC108004.2	-0.0740359	6.21956e-07	1.75854e-06			AP2S1	0.858096	8.47489e-25	6.35053e-24
AC108004.5	-0.382838	3.35265e-12	1.52127e-11			AP3S2	-0.279995	4.96208e-06	1.0501e-05
AC108025.2	0.0957932	1.26478e-13	6.45407e-13			AP4B1-AS1	-0.277473	0.0238066	0.0329446
AC108142.1	-0.300889	1.90956e-08	6.28418e-08			APCDD1L	-3.00569	1.32875e-48	3.40808e-47
AC108218.1	-0.0998661	0.000336991	0.000688141			APCDD1L-AS1	-3.7148	9.00189e-69	7.30688e-67
AC108456.1	-0.203835	0.00201113	0.00367667			API5P1	-0.242573	0.0351833	0.0474695
AC108463.2	0.206698	0.000244544	0.000508161			APIP	-0.157697	0.0112721	0.0163224
AC108479.2	-0.0565142	0.00100839	0.00193168			APITD1-CORT	0.873715	1.51532e-18	7.92341e-18
AC108488.4	-0.164297	6.23462e-05	0.000140002			APOA1-AS	-0.663934	6.73161e-06	1.40401e-05
AC108676.1	0.201929	0.00121977	0.00230688			APOC1	0.957881	2.56093e-10	7.72929e-10
AC108868.5	0.0261883	0.0111777	0.0181393			APOC2	1.23093	3.01259e-15	1.27537e-14
AC109631.1	-0.0518959	0.000257658	0.00053407			APOC4-APOC2	0.964786	7.65745e-12	2.57846e-11
AC109642.1	-0.0740063	0.00898428	0.0148482			APOD	-3.05649	3.34817e-30	3.32264e-29
AC109815.2	-0.0455541	0.000101852	0.00022276			APOE	0.505645	0.00162612	0.00262889
AC109826.1	0.287331	3.63743e-06	9.43997e-06			APOM	-0.423791	3.27577e-05	6.38226e-05
AC110792.1	-0.0216164	0.0205036	0.0317929			APOO	0.917488	3.18814e-37	4.455e-36
AC112218.1	-0.719063	3.9832e-30	6.87116e-29			AQP1	-2.32792	2.48138e-69	2.08784e-67
AC112229.1	0.10719	8.37853e-09	2.85045e-08			AQP7P1	-4.31346	1.26431e-85	3.45469e-83
AC112229.4	-0.0205057	2.04555e-05	4.87801e-05			AQPEP	-4.2517	1.72696e-76	2.3249e-74
AC112715.2	-0.14069	0.00262361	0.00471946			ARF3	0.681406	1.70898e-33	2.00957e-32
AC112721.1	0.3083	3.2994e-13	1.6276e-12			ARF4P2	0.995859	1.14358e-14	4.66663e-14
AC112721.2	0.445065	1.24017e-16	7.99224e-16			ARF5	0.593779	5.30289e-15	2.21171e-14
AC113167.1	-0.040193	8.67141e-07	2.41609e-06			ARF6	0.468917	1.42553e-17	6.96436e-17
AC113167.2	-0.0615075	8.66651e-08	2.67413e-07			ARHGAP11B	1.22827	6.51623e-26	5.20055e-25
AC114730.3	0.263911	2.11898e-07	6.29323e-07			ARHGAP31-AS1	-0.697625	3.11165e-06	6.70377e-06
AC114730.5	0.061043	0.000640493	0.00126072			ARHGAP42P2	0.635529	6.88455e-05	0.000129684
AC114730.7	-0.0361217	0.000172929	0.000366683			ARHGAP5-AS1	-1.48841	1.77657e-52	5.59701e-51
AC114730.8	0.0299117	0.000258212	0.000535066			ARHGDIG	-0.727171	0.00303425	0.00475601
AC114765.1	0.0716436	0.00734745	0.0123224			ARHGEF16	1.25367	2.87508e-34	3.5078e-33
AC114765.2	0.16083	4.11528e-05	9.46087e-05			ARHGEF26-AS1	0.390221	0.0195027	0.0273327
AC114776.1	0.27702	5.1365e-19	3.93001e-18			ARHGEF34P	-0.376486	0.0012277	0.00201475
AC114788.2	-0.0166226	0.000194254	0.000409257			ARIH2P1	-0.237608	0.023958	0.0331285
AC114803.3	0.221246	2.79987e-15	1.62846e-14			ARL2	-0.330048	0.000272721	0.000482378
AC114808.2	-0.038764	1.85062e-05	4.43782e-05			ARL2BP	-0.458626	8.96383e-08	2.20819e-07
AC114814.4	-0.075173	2.47274e-15	1.44696e-14			ARL4C	-1.07997	7.6446e-19	4.06582e-18
AC114877.3	-0.199835	5.77207e-18	4.09984e-17			ARL4D	-0.463223	0.000199551	0.000358215
AC115522.3	0.656872	4.84618e-11	1.99732e-10			ARL6IP4	0.325184	0.0119058	0.0171787
AC116035.1	-0.669193	8.00843e-36	2.07321e-34			ARL6IP5	-0.384723	1.30526e-10	4.00964e-10
AC116366.6	-0.299421	2.29597e-12	1.0544e-11			ARL8A	0.621402	8.09743e-25	6.07429e-24
AC118278.1	-0.354591	0.000820221	0.00158934			ARMC10P1	0.266928	0.025519	0.0351364
AC118344.1	0.141266	0.0204758	0.0317511			ARPC3	0.67966	2.55864e-27	2.19637e-26
AC118754.4	-0.0761334	0.000386928	0.000783649			ARPC3P1	0.618544	2.62696e-07	6.22361e-07
AC121251.1	0.102535	0.0312018	0.0467835			ARPC3P2	0.352032	0.00115805	0.00190544
AC122129.1	-0.5322	3.97381e-20	3.31302e-19			ARPC4-TTLL3	-0.506891	5.91939e-08	1.48031e-07
AC123023.1	0.275878	1.13526e-06	3.11903e-06			ARRDC1	1.10691	6.86008e-36	8.98977e-35
AC123768.4	-0.111284	4.14103e-19	3.19113e-18			ART4	-2.86983	3.19929e-36	4.26336e-35
AC123886.2	-0.0206937	0.00138244	0.00259493			ARTN	2.61618	9.71236e-39	1.46872e-37
AC124944.5	-0.0297733	0.00591865	0.010066			ASB16-AS1	0.504155	3.43197e-12	1.18202e-11
AC125232.1	-0.318152	2.16311e-11	9.20016e-11			ASB9P1	-0.291458	0.0371156	0.0498936
AC125238.2	0.0105355	0.00406172	0.00709968			ASCL1	2.2357	3.28148e-07	7.71466e-07
AC128709.2	0.0963268	5.9929e-05	0.000134899			ASCL2	1.54369	7.12463e-12	2.40168e-11
AC128709.3	0.110312	0.000516215	0.00102921			ASCL4	1.13234	4.02254e-07	9.37065e-07
AC128709.4	0.0574945	0.00106877	0.00203962			ASCL5	0.612827	8.3853e-05	0.000156691
AC129492.6	0.0779434	0.0085659	0.0142083			ASF1B	2.81812	3.1206e-92	1.48487e-89
AC129778.2	-0.0314148	2.49324e-12	1.14226e-11			ASH1L-AS1	0.433009	8.52306e-08	2.10412e-07
AC130710.1	0.0307182	0.0252999	0.0386077			ASLP1	-0.306551	0.0210463	0.0293322
AC131097.3	-0.303597	5.75622e-09	1.98481e-08			ASS1P1	-1.08101	1.3045e-10	4.00773e-10
AC131097.4	-0.631566	1.50739e-17	1.04002e-16			ASS1P10	-0.506311	3.10095e-05	6.0609e-05
AC132008.1	-0.635372	1.76608e-36	4.79685e-35			ASS1P12	0.310493	0.00598539	0.00900729
AC132192.1	0.313617	2.52355e-10	9.78096e-10			ATAT1	0.30171	5.13773e-05	9.8139e-05
AC133528.2	0.213078	0.00375884	0.00660607			ATE1-AS1	-0.372063	0.0284182	0.0388703
AC133633.1	-0.01961	0.0302725	0.0454968			ATF4P3	-0.289187	0.0113982	0.0164962
AC133680.1	0.079127	6.05689e-08	1.90044e-07			ATF7	-0.612347	2.75987e-34	3.37022e-33
AC133785.1	0.167147	3.93736e-12	1.77642e-11			ATG10	-0.198195	0.000353498	0.000617731
AC135048.13	0.0494066	0.00143723	0.00269022			ATG4C	-0.339771	1.1021e-10	3.40753e-10
AC135050.5	0.069586	0.00101892	0.0019503			ATMIN	-0.381869	4.41654e-13	1.62301e-12
AC135178.7	-0.45867	3.91442e-27	5.43175e-26			ATOX1	0.794271	2.08407e-23	1.4561e-22
AC136289.1	-0.110208	1.14769e-20	9.92482e-20			ATP1A1OS	-0.45713	7.42713e-09	2.00072e-08
AC136704.1	-0.171486	5.4093e-05	0.000122496			ATP1B3-AS1	-0.860933	1.84892e-08	4.82429e-08
AC137723.5	0.0415833	0.00510409	0.00878147			ATP5A1P3	-0.577001	4.0716e-07	9.47454e-07
AC137932.5	-0.403138	1.53351e-08	5.09074e-08			ATP5C1P1	0.344738	0.00187681	0.00301193
AC137932.6	0.117525	0.000170479	0.000361823			ATP5D	0.409222	0.000457684	0.000789448
AC138035.2	-0.106876	7.42175e-06	1.86285e-05			ATP5E	0.467789	1.8836e-08	4.90966e-08
AC138123.2	-0.944113	6.25594e-14	3.27581e-13			ATP5EP2	0.73182	8.8316e-07	1.99701e-06
AC138517.4	-0.00610418	0.0260364	0.0396536			ATP5F1P5	-1.54548	3.39714e-18	1.73587e-17
AC138655.4	-0.0778259	0.000311079	0.000638556			ATP5G1	0.597936	1.03543e-09	2.97882e-09
AC139099.4	-0.145084	9.53514e-14	4.91245e-13			ATP5G1P4	1.61312	3.76926e-26	3.04877e-25
AC139099.5	0.00947914	0.00239867	0.0043412			ATP5H	0.46573	8.91515e-09	2.38712e-08
AC139100.2	-0.122866	0.00824851	0.0137118			ATP5I	0.53863	1.40851e-09	4.01281e-09
AC139143.2	0.0240081	8.31985e-05	0.000184027			ATP5J2	0.548137	2.63082e-13	9.82348e-13
AC139530.1	-0.190017	0.0077914	0.0130059			ATP5L	-0.172413	0.0126793	0.0182251
AC141928.1	-0.197574	2.05416e-15	1.20823e-14			ATP5S	-0.386839	9.96264e-13	3.56013e-12
AC141930.2	0.0903185	0.0145072	0.0230922			ATP6AP1L	0.325189	0.000136405	0.000249504
AC142293.3	-0.0441982	0.00331228	0.00586594			ATP6V0D1	0.152054	0.0241804	0.0334067
AC142528.1	0.126247	1.73218e-06	4.6641e-06			ATP6V0E2-AS1	-0.425673	1.37058e-05	2.77617e-05
AC144449.1	-0.0769742	0.00134426	0.00252776			ATP6V1F	0.648946	1.34704e-17	6.59491e-17
AC144450.1	-0.303635	4.03333e-05	9.28535e-05			ATP6V1G1	0.764523	1.94889e-31	2.07586e-30
AC144450.2	-0.205756	0.000260554	0.000539735			ATPAF2	0.418458	1.54722e-09	4.39301e-09
AC144521.1	0.132132	3.43161e-07	9.97068e-07			ATXN1L	-0.945975	6.17059e-37	8.49356e-36
AC144522.1	-0.432025	7.27098e-13	3.48033e-12			ATXN7L3	0.428359	9.9775e-20	5.60813e-19
AC144525.1	-0.0327999	1.10652e-08	3.72622e-08			AUP1	0.504814	6.25652e-16	2.75518e-15
AC144652.1	0.504388	3.92373e-12	1.77049e-11			AVPR1A	-1.67708	2.68156e-34	3.28331e-33
AC144831.1	-0.573533	1.39955e-18	1.03665e-17			AZGP1P1	1.67159	1.00668e-15	4.38071e-15
AC144835.1	0.203317	2.81451e-05	6.60033e-05			AZGP1P2	0.631785	0.00171544	0.00276509
AC145110.1	0.0413075	0.00124648	0.00235398			AZI1	0.791224	1.26593e-12	4.49354e-12
AC145343.2	0.21359	1.26518e-07	3.83724e-07			B3GALT6	0.510853	1.43283e-12	5.06511e-12
AC147651.1	-0.326822	4.09046e-19	3.15616e-18			B3GAT1	-2.71888	1.02614e-29	9.98569e-29
AC147651.3	-0.100342	3.89544e-08	1.24584e-07			B3GNT8	0.316567	0.00718167	0.0106892
AC147651.4	0.402735	4.29622e-12	1.92973e-11			B3GNT9	0.256093	0.00525325	0.00797027
AC159540.1	0.0826139	5.43934e-07	1.54882e-06			B4GALT2	0.436694	1.23575e-10	3.80669e-10
AC226118.1	-0.276549	8.26693e-09	2.81327e-08			BAALC	-1.74482	1.99969e-19	1.10596e-18
AC226119.4	0.022494	0.00438464	0.0076221			BABAM1	0.411335	6.06553e-11	1.91267e-10
AC231657.1	0.319088	2.58315e-10	9.99957e-10			BACH1-IT1	-0.346741	0.00590751	0.00889931
AC239860.1	-0.137175	2.59608e-06	6.86351e-06			BACH1-IT2	-0.38579	0.00556546	0.00841573
AC241585.3	-0.238811	1.29641e-13	6.60714e-13			BAIAP2-AS1	0.534749	2.45619e-11	7.96638e-11
AC241952.1	-0.096762	0.000110777	0.000241108			BAK1P2	1.03126	2.00111e-07	4.78734e-07
AC242988.1	0.834572	1.07628e-19	8.68119e-19			BAMBI	0.612671	0.00803438	0.0118814
AC243547.1	-0.596724	1.14101e-15	6.82359e-15			BANF1	0.665111	1.55401e-15	6.68341e-15
AC244102.1	0.352815	3.16813e-07	9.23679e-07			BANF1P2	-0.962782	1.18923e-13	4.54452e-13
AC244394.1	-0.263837	5.59367e-06	1.42063e-05			BANF1P3	0.552767	6.10801e-06	1.27975e-05
AC244517.1	-0.421366	1.49306e-05	3.62282e-05			BATF	1.42177	1.46667e-21	9.17639e-21
AC253572.1	-0.243632	6.85486e-06	1.7265e-05			BBIP1	-0.419631	1.83673e-10	5.59678e-10
ACA59	-0.260544	3.57037e-05	8.27125e-05			BCAM	0.687261	7.52973e-08	1.86758e-07
ACA64	0.203138	2.77922e-08	9.00546e-08			BCAS2P2	0.476584	0.00631161	0.00946828
ACACB	-3.03773	4.45739e-59	6.15424e-57			BCDIN3D-AS1	-0.192483	0.0179416	0.02529
ACAD8	-0.572214	3.90001e-22	3.76271e-21			BCL2	-0.354455	0.0110132	0.0159683
ACAD9	0.206523	0.000117145	0.000254134			BCL2A1	0.55002	0.000458794	0.000791213
ACADL	-1.13331	1.52091e-22	1.52468e-21			BCL2L15	0.2864	0.0296899	0.0404813
ACADM	-0.554841	2.32756e-10	9.05246e-10			BCMO1	-0.576317	0.00062809	0.00106658
ACADS	-1.55331	2.0746e-37	6.0063e-36			BCRP2	1.26994	5.55317e-08	1.39291e-07
ACAN	0.910759	5.41294e-11	2.22237e-10			BCRP3	0.39611	0.0167632	0.023721
ACAP2	-0.210789	0.00216406	0.00394005			BCYRN1	-0.759233	4.93728e-06	1.04501e-05
ACAP3	0.316798	4.70543e-06	1.20538e-05			BDH2P1	-0.567315	4.74084e-06	1.00482e-05
ACBD4	-0.966936	1.18206e-37	3.48312e-36			BDNF-AS	-0.630897	6.3742e-11	2.00702e-10
ACBD7	0.710657	8.85065e-12	3.87375e-11			BET1L	0.142382	0.00573675	0.00865861
ACD	0.259495	0.000106343	0.000232094			BEX2	-0.693614	0.000537451	0.000919964
ACE2	0.286541	0.00192555	0.00353103			BEX5	-0.808427	8.90496e-07	2.01293e-06
ACER2	-1.41698	1.02351e-48	6.62644e-47			BFSP2-AS1	0.729015	0.00123126	0.00202048
ACER3	-0.24594	0.00169532	0.00313694			BGLAP	0.402571	0.00992955	0.0144962
ACKR3	-2.00732	2.0201e-30	3.56402e-29			BHLHA15	0.772339	0.000260155	0.000461127
ACKR4	-0.857122	1.25011e-22	1.26153e-21			BHLHE40-AS1	0.259925	0.0049982	0.00760211
ACMSD	-0.0985954	3.95714e-05	9.12551e-05			BIN3	-0.317142	1.12181e-05	2.28925e-05
ACO1	-1.47368	2.42975e-28	3.66423e-27			BLOC1S4	0.550782	1.93129e-19	1.06984e-18
ACOT1	-0.833308	5.99235e-18	4.24944e-17			BLOC1S5	-0.1884	3.16724e-05	6.18303e-05
ACOT12	-0.00968118	0.00273793	0.00490937			BLOC1S5-TXNDC5	-1.9521	1.27685e-36	1.73504e-35
ACOT13	0.284411	9.09553e-09	3.08488e-08			BMF	0.773366	7.63791e-22	4.85917e-21
ACOT2	-0.841843	2.08398e-20	1.77355e-19			BMP4	-0.827728	5.03986e-06	1.06582e-05
ACOT4	-0.486326	4.30057e-09	1.49905e-08			BMP7	-0.940043	8.52517e-05	0.000159176
ACOT7	1.34395	5.37501e-40	1.85881e-38			BMP8A	2.12774	1.18751e-50	3.42454e-49
ACOT8	0.444836	1.30473e-18	9.68779e-18			BMPR1APS1	-0.49845	0.00332786	0.0051856
ACOT9	0.181315	0.00442862	0.00769194			BMS1P10	-0.881841	1.17456e-10	3.62591e-10
ACOXL	0.127788	1.12916e-08	3.80001e-08			BMS1P2	-0.838158	5.52065e-09	1.50344e-08
ACP1	0.702446	1.95534e-21	1.79347e-20			BMS1P20	-0.394186	7.18815e-08	1.78703e-07
ACP2	0.425049	4.70411e-11	1.94206e-10			BNIP2	-0.947973	2.53858e-62	1.37372e-60
ACPL2	0.179898	0.0105901	0.0172657			BOK-AS1	-2.21137	9.50961e-48	2.33909e-46
ACPT	0.0409019	0.0292026	0.0440485			BOLA2B	1.41755	1.5485e-25	1.21201e-24
ACRBP	0.100865	0.0105091	0.0171451			BOLA3	0.487632	4.86456e-11	1.54437e-10
ACRC	-0.113184	2.5258e-06	6.68885e-06			BOLA3-AS1	-1.00405	8.94491e-15	3.67682e-14
ACRV1	0.259361	5.94653e-28	8.79672e-27			BOP1	1.03119	6.00354e-20	3.41902e-19
ACSL1	-2.09074	2.37027e-27	3.33963e-26			BRF2	0.292746	0.0152186	0.0216373
ACSL4	-0.607435	2.81954e-11	1.18688e-10			BRI3	-0.256022	0.000141359	0.000258103
ACSL5	-0.762069	1.11375e-12	5.24837e-12			BRI3P1	-0.342182	0.00435789	0.00668422
ACSM1	-0.856902	4.4047e-06	1.13176e-05			BRWD1-AS1	0.738343	1.7275e-06	3.80917e-06
ACSM2A	-0.0316312	3.59017e-07	1.04187e-06			BRWD1-IT2	0.628636	7.16241e-08	1.7808e-07
ACSM3	-0.496949	1.23171e-06	3.36877e-06			BSN-AS2	0.78784	6.10328e-06	1.27886e-05
ACSS2	-1.38838	8.2561e-35	1.99163e-33			BSPRY	1.45276	1.82308e-26	1.50234e-25
ACSS3	-1.19241	2.20289e-29	3.6104e-28			BTBD7P1	-0.623716	0.0053654	0.00813059
ACTA2-AS1	-1.757	1.29681e-33	2.88576e-32			BTBD8	-0.922637	9.33376e-11	2.90573e-10
ACTBP1	0.0381228	7.50983e-05	0.000167012			BTC	-1.02427	9.46491e-10	2.72978e-09
ACTBP11	0.0669839	9.53375e-06	2.36463e-05			BTF3L4P1	0.254331	0.028729	0.0392682
ACTBP13	0.0108169	0.00114893	0.00218185			BTF3L4P2	0.229825	0.000949292	0.00157946
ACTBP2	0.131644	1.00477e-06	2.78169e-06			BTF3P7	0.290721	0.0127936	0.018378
ACTBP7	0.0751828	9.41021e-08	2.89282e-07			BTG1	-0.597627	2.41346e-13	9.03385e-13
ACTBP8	0.119842	0.00135948	0.00255455			BTG2	-0.553207	5.26389e-05	0.000100424
ACTBP9	0.0490682	0.000110039	0.000239658			BTG3	-0.789154	5.74197e-11	1.81458e-10
ACTG1P1	0.246243	2.86618e-06	7.53387e-06			BTNL10	1.10102	1.50901e-09	4.28894e-09
ACTG1P10	-0.0654523	0.0248351	0.0379587			BVES-AS1	-2.21787	1.0334e-50	2.98637e-49
ACTG1P11	0.012461	0.0063756	0.0107893			BX470102.3	-1.47356	2.56507e-20	1.49072e-19
ACTG2	-2.18567	1.86747e-13	9.39275e-13			BX649563.4	-1.67879	1.15713e-41	2.0484e-40
ACTL10	0.328421	1.15748e-06	3.17625e-06			BX842568.2	-1.79748	8.88938e-29	8.29375e-28
ACTL8	1.43285	7.44524e-14	3.86966e-13			BX936347.1	0.756154	5.01882e-14	1.96523e-13
ACTN4P1	0.0259408	0.00490314	0.00845408			C10orf10	-2.41392	6.42297e-53	2.05639e-51
ACTN4P2	0.00835605	0.00699988	0.0117769			C10orf111	-0.604219	3.5492e-08	9.03439e-08
ACTR10	-0.397182	1.08578e-16	7.02585e-16			C10orf118	-0.370481	8.51227e-06	1.75984e-05
ACTR2	0.628021	3.98353e-21	3.57635e-20			C10orf129	-0.999378	7.29206e-08	1.81189e-07
ACTR3	0.785411	1.11588e-31	2.16812e-30			C10orf25	-0.910616	1.13489e-24	8.43997e-24
ACTR3B	0.910133	4.54832e-19	3.49465e-18			C10orf32	-0.161538	0.0158822	0.0225321
ACTR3C	0.0925416	0.00296772	0.00529586			C10orf35	0.7969	7.15002e-17	3.33942e-16
ACVR2A	-0.66662	1.02283e-23	1.1149e-22			C10orf54	-1.81004	2.54751e-55	9.263e-54
ACVR2B-AS1	-0.197904	0.00120482	0.0022805			C10orf67	0.549059	0.0083638	0.0123416
ACVRL1	-0.939869	8.35029e-23	8.49478e-22			C10ORF68	0.373668	0.00114453	0.00188442
ACYP1	0.413265	1.08583e-09	3.98614e-09			C11orf31	0.807347	6.57474e-23	4.44512e-22
ACYP2	-0.17581	0.000149252	0.000319281			C11orf35	1.42242	3.46781e-22	2.2487e-21
AD000090.2	0.258906	0.000273356	0.000565066			C11orf52	-0.271072	0.027239	0.0373461
ADAL	-0.457778	9.36022e-26	1.17892e-24			C11orf71	-0.288852	0.000767116	0.00128973
ADAM10	-0.246295	0.000301481	0.000619796			C11orf73	-0.180587	0.00491803	0.00748884
ADAM17	0.214711	0.0107551	0.0175088			C11orf82	1.23459	5.09255e-25	3.86748e-24
ADAM19	1.38358	6.01148e-39	1.92886e-37			C11orf83	1.01491	8.49567e-19	4.51143e-18
ADAM1B	-0.185613	2.94621e-16	1.8436e-15			C11orf89	-1.05591	1.115e-08	2.96024e-08
ADAM20	-0.0265388	0.00109833	0.0020923			C11orf91	-1.60289	1.20184e-30	1.22664e-29
ADAM20P1	-0.0572784	9.59961e-08	2.94881e-07			C11orf96	-0.891169	5.06449e-09	1.38482e-08
ADAM22	-0.512524	3.61976e-16	2.25116e-15			C12orf23	0.482267	4.36924e-13	1.60648e-12
ADAM29	-0.0593322	0.0159303	0.0251705			C12orf39	-5.20717	1.36987e-71	1.30364e-69
ADAM8	1.55067	4.3593e-39	1.42365e-37			C12orf44	0.670114	1.41646e-16	6.50007e-16
ADAMTS10	-0.191442	0.0120245	0.0194021			C12orf49	0.216061	0.00211236	0.00336917
ADAMTS3	-0.164854	0.019991	0.0310469			C12orf54	-2.00562	1.31156e-38	1.97041e-37
ADAMTS4	1.14398	1.51306e-16	9.70283e-16			C12orf55	-0.524679	9.71432e-05	0.000180366
ADAMTS7	0.69788	3.60616e-18	2.60132e-17			C12orf60	0.371599	0.00148675	0.00241553
ADAMTS7P3	0.0398201	2.90434e-07	8.50579e-07			C12orf61	-0.25043	0.00903285	0.01326
ADAMTS7P4	0.0356273	0.0261875	0.0398669			C12orf68	-0.919767	1.26311e-11	4.17776e-11
ADAMTS8	-0.653328	2.50712e-17	1.70176e-16			C12orf76	0.126147	0.0174768	0.0246689
ADAMTS9	-0.534524	1.30532e-07	3.95403e-07			C12orf79	-1.4337	9.598e-16	4.1846e-15
ADAMTS9-AS1	-0.535956	2.74195e-17	1.85666e-16			C14orf1	0.36308	1.15851e-08	3.07133e-08
ADAMTS9-AS2	-0.691278	8.75028e-42	3.46682e-40			C14orf132	-0.929196	3.66532e-09	1.01216e-08
ADAMTSL4-AS1	-0.122436	1.78981e-09	6.45608e-09			C14orf164	0.453073	0.000380448	0.000662185
ADAMTSL5	-0.368947	3.96994e-13	1.94469e-12			C14orf166	0.162658	0.00219357	0.00349305
ADAP1	0.290253	7.67019e-06	1.92177e-05			C14orf166B	-1.41987	2.37462e-26	1.94349e-25
ADAR	0.788834	4.0303e-20	3.35831e-19			C14orf2	0.325879	1.61793e-05	3.25616e-05
ADARB1	-0.177288	0.00638171	0.0107986			C14orf28	-0.711137	5.30252e-31	5.50561e-30
ADAT3	0.473972	9.23872e-14	4.7658e-13			C14orf64	-2.1042	3.68655e-23	2.53593e-22
ADC	0.147905	0.00606867	0.0103048			C14orf79	0.879077	1.3749e-24	1.01809e-23
ADCK4	0.1791	0.0059444	0.0101079			C15orf38	-0.392036	1.60561e-05	3.23254e-05
ADCK5	0.930742	1.6351e-23	1.75499e-22			C15orf41	-0.522548	1.05933e-10	3.28082e-10
ADCY4	-1.41267	7.95621e-52	6.50233e-50			C15orf48	1.99073	5.23613e-22	3.3661e-21
ADCY6	-1.29076	1.84039e-37	5.34946e-36			C16orf13	1.07978	7.61062e-28	6.71692e-27
ADCYAP1	0.248332	0.023672	0.0363042			C16orf52	-0.267549	5.57983e-06	1.17524e-05
ADCYAP1R1	-1.21589	1.07642e-43	4.8201e-42			C16orf74	0.677889	1.20865e-06	2.70136e-06
ADD1	-0.861806	7.57738e-44	3.41826e-42			C16orf80	-0.35759	1.33841e-10	4.10826e-10
ADD3	-1.26844	4.51555e-32	9.02368e-31			C16orf98	1.26695	3.25982e-19	1.77795e-18
ADGB	-0.00475364	0.0157977	0.0249819			C17orf105	-0.594435	1.32035e-07	3.20541e-07
ADH1B	-5.31075	1.99156e-61	3.25527e-59			C17orf50	-0.324253	0.0319735	0.0433849
ADH4	-0.554331	2.31414e-18	1.69243e-17			C17orf51	-1.64364	2.43159e-44	4.94889e-43
ADH5	-0.708563	2.30547e-31	4.36769e-30			C17orf58	0.302895	0.00409125	0.00629764
ADH5P4	-0.0628386	1.42184e-05	3.45738e-05			C17orf61-PLSCR3	-0.960389	9.27678e-18	4.5849e-17
ADH6	-0.0599073	3.07727e-05	7.19292e-05			C17orf89	0.399984	2.17029e-05	4.31432e-05
ADH7	-0.140549	0.000400015	0.000808459			C18orf56	1.56551	1.50781e-27	1.31353e-26
ADHFE1	-1.46323	2.71218e-44	1.27232e-42			C19orf24	0.888691	1.17752e-18	6.19704e-18
ADIPOQ	-5.12986	3.75483e-49	2.52051e-47			C19orf48	1.01835	5.03724e-27	4.26565e-26
ADIPOQ-AS1	-0.312165	1.47887e-14	8.15383e-14			C19orf52	0.454633	1.47513e-16	6.76259e-16
ADIPOR1	0.54071	2.09042e-20	1.77861e-19			C19orf55	0.474156	1.97567e-12	6.92373e-12
ADIRF-AS1	-0.91308	6.85273e-33	1.45306e-31			C19orf59	0.822312	2.00303e-05	3.99564e-05
ADM	-0.67322	2.84322e-05	6.66379e-05			C19orf60	0.419877	0.000533649	0.000914192
ADM5	-0.265554	0.000527385	0.00105016			C19orf67	0.593918	5.46534e-05	0.000104116
ADORA2B	0.27731	0.00178114	0.00328556			C19orf70	0.366425	0.00010537	0.00019488
ADORA2BP	-0.0959734	8.39451e-05	0.000185487			C19orf71	0.265291	0.0244684	0.0337843
ADPGK	0.410959	5.59731e-16	3.43877e-15			C19orf77	-0.877043	1.22641e-07	2.98733e-07
ADPRHL2	0.785916	3.88035e-21	3.48715e-20			C19orf80	-3.17231	4.96188e-54	1.69268e-52
ADPRM	-0.595882	9.33211e-25	1.09692e-23			C19orf82	0.174422	0.00311068	0.00486891
ADRA1B	-0.306232	0.000104833	0.000228991			C19orf84	0.654535	8.08207e-07	1.83248e-06
ADRA2A	-2.39934	9.17528e-50	6.38242e-48			C1orf100	0.600791	1.1248e-05	2.29501e-05
ADRA2C	-0.734684	7.94182e-14	4.11777e-13			C1orf115	-1.57235	3.61415e-23	2.48736e-22
ADRB1	-0.750144	1.16952e-19	9.40833e-19			C1orf131	0.739501	1.0011e-34	1.25128e-33
ADRBK2	-1.4715	3.74402e-37	1.07035e-35			C1orf145	-0.380279	0.00816213	0.0120614
ADRM1	1.19534	2.47475e-34	5.78235e-33			C1orf147	0.503874	0.000250098	0.000444071
ADSSL1	-0.5018	5.25102e-09	1.81697e-08			C1orf170	1.10859	1.19436e-14	4.86809e-14
ADTRP	-0.25716	0.00152617	0.00284343			C1orf172	1.49227	4.55604e-31	4.74303e-30
AE000658.31	0.0346254	1.40226e-05	3.41182e-05			C1orf173	-0.995284	0.00234455	0.00372339
AE000662.93	0.0971536	2.37548e-05	5.62103e-05			C1orf189	1.28173	7.19031e-15	2.97197e-14
AEN	0.55133	4.77985e-15	2.72739e-14			C1orf200	0.560474	7.14568e-05	0.000134364
AF001548.6	-0.305107	6.45735e-22	6.12306e-21			C1orf210	1.22853	2.14384e-22	1.40837e-21
AF011889.2	-0.326517	9.23697e-08	2.84244e-07			C1orf213	-0.936506	4.88104e-28	4.3736e-27
AF015262.2	0.195926	1.04954e-08	3.54252e-08			C1orf228	0.529075	3.39594e-05	6.60474e-05
AF038458.3	0.071548	0.000154803	0.0003304			C1orf233	1.60965	1.64954e-34	2.04602e-33
AF038458.4	0.0214937	0.022194	0.0341915			C1orf27	0.550409	1.82409e-16	8.31538e-16
AF038458.5	0.0842901	3.47363e-07	1.00888e-06			C1orf51	0.577742	0.000105268	0.000194722
AF064858.11	-0.0924946	0.000760914	0.00148111			C1orf63	-0.2649	0.00453184	0.00693137
AF064860.5	-0.0955169	0.00577713	0.00984416			C1orf65	1.22296	6.51825e-09	1.76554e-08
AF067845.1	-0.0787835	3.15257e-13	1.55825e-12			C1QBP	0.310953	1.28363e-05	2.60752e-05
AF124730.4	-0.0419476	0.00118806	0.00225112			C1QL3	-0.70114	0.00115379	0.00189853
AF127577.12	-0.0664741	0.000591402	0.00116984			C1QL4	-1.14093	2.38725e-08	6.17116e-08
AF127936.3	0.0371231	0.0130252	0.0208974			C1QTNF1	-1.42672	3.98039e-26	3.21671e-25
AF127936.7	-0.458228	3.30196e-15	1.9086e-14			C1QTNF9B-AS1	0.817971	3.61147e-07	8.45659e-07
AF131215.2	-0.912094	5.40727e-27	7.42354e-26			C1RL-AS1	-0.336532	0.00243492	0.00386001
AF131215.8	-0.450602	2.09579e-15	1.23073e-14			C20orf112	0.529158	4.79723e-14	1.88167e-13
AF131215.9	-0.597792	3.42171e-18	2.47315e-17			C20orf144	1.69738	2.24099e-42	4.13691e-41
AF131216.6	-0.0361559	2.2843e-05	5.4137e-05			C20orf197	-0.684119	1.52633e-07	3.69117e-07
AF146191.4	-0.218736	1.48541e-05	3.60569e-05			C20orf201	1.51342	6.20497e-16	2.73336e-15
AF165138.7	0.0332641	6.14103e-07	1.73735e-06			C20orf202	-0.608694	2.17506e-07	5.18684e-07
AF186192.1	-0.454545	9.2208e-11	3.71379e-10			C20orf26	1.23772	5.91389e-15	2.45875e-14
AF186192.5	-0.652474	4.38097e-12	1.96658e-11			C21orf49	-1.02824	5.76633e-25	4.36955e-24
AF196972.9	0.0580691	0.0225018	0.0346349			C21orf67	0.262144	0.000536854	0.000919112
AF230666.2	0.0669027	0.00359144	0.00632864			C21orf88	-0.694006	0.012299	0.0177108
AFAP1-AS1	1.2656	1.07333e-15	6.44e-15			C21orf90	-0.739212	4.85261e-05	9.28855e-05
AFAP1L1	-1.02327	5.04223e-22	4.82387e-21			C22orf15	-0.745188	9.04996e-07	2.04454e-06
AFG3L2	0.48788	6.1417e-12	2.72143e-11			C22orf39	-0.709402	8.68247e-29	8.10893e-28
AFG3L2P1	0.0108443	0.00711431	0.0119567			C22orf43	-0.50159	0.000675983	0.00114371
AGA	-0.186286	0.0163677	0.0257956			C22orf46	-0.386691	1.088e-08	2.89051e-08
AGAP10	-0.352743	3.88722e-09	1.36082e-08			C2CD4B	-2.0173	1.06539e-18	5.62194e-18
AGAP11	-0.195918	5.31546e-39	1.72221e-37			C2ORF15	1.12949	2.36966e-34	2.91304e-33
AGAP1-IT1	0.293581	1.85273e-08	6.10486e-08			C2orf27A	0.714735	3.00685e-08	7.70217e-08
AGAP2	0.276603	1.02378e-06	2.82916e-06			C2orf54	1.85285	2.01621e-07	4.8222e-07
AGAP3	0.260857	0.000408538	0.000824861			C2orf62	1.17101	6.51208e-10	1.9018e-09
AGAP4	-0.0876334	0.0150576	0.0239004			C2orf66	-0.54076	0.00119606	0.00196458
AGAP7	-0.0638742	0.0242329	0.0371115			C2orf74	-1.10172	7.6204e-17	3.5513e-16
AGBL5	0.292885	1.82432e-05	4.37764e-05			C2orf88	-3.25505	4.86222e-86	1.38338e-83
AGBL5-IT1	-0.390686	8.93982e-12	3.91137e-11			C2orf91	0.556684	0.000139148	0.000254267
AGGF1	-0.399165	2.45847e-16	1.54876e-15			C3orf55	-3.28561	2.44889e-66	1.6981e-64
AGK	0.312945	4.9019e-10	1.85174e-09			C3orf80	2.00532	2.1786e-51	6.47898e-50
AGMO	-0.380841	1.52346e-08	5.06106e-08			C3orf83	0.712821	4.8679e-08	1.22543e-07
AGPAT1	0.269037	1.75032e-07	5.23673e-07			C4orf21	0.264245	0.00249884	0.00395612
AGPAT2	-1.24647	1.87621e-12	8.68307e-12			C4orf27	-0.124194	0.0161618	0.0229111
AGPAT3	0.110151	0.0316619	0.0474109			C4orf46	0.47877	6.75424e-13	2.4456e-12
AGPAT5	0.579327	1.52949e-10	6.04858e-10			C4orf48	1.52797	8.36936e-17	3.89376e-16
AGPAT6	0.19336	0.00851272	0.0141272			C5orf30	0.728096	3.62802e-13	1.34199e-12
AGPS	-0.332425	1.39584e-06	3.79632e-06			C5orf46	0.730986	0.00118886	0.00195356
AGR2	-2.6368	1.4082e-18	1.04285e-17			C5orf55	0.292726	0.00244736	0.00387929
AGR3	-3.0577	2.29159e-36	6.17813e-35			C5orf58	-0.528128	0.00161567	0.00261413
AGRP	0.0826484	5.82421e-07	1.65182e-06			C5orf64	-2.17881	4.06146e-31	4.24899e-30
AGTRAP	0.607038	3.43881e-13	1.69408e-12			C5orf66	1.03845	5.68682e-21	3.44782e-20
AGXT	-0.0931878	8.91928e-13	4.23869e-12			C6orf106	-0.21561	5.44279e-06	1.14717e-05
AHCTF1P1	0.0553684	0.000236244	0.000492034			C6orf120	-0.209158	0.00142928	0.00232592
AHCY	0.947318	5.96255e-21	5.28924e-20			C6orf15	-2.37324	1.87363e-21	1.1633e-20
AHCYL2	-0.338027	1.05487e-07	3.22946e-07			C6ORF165	0.692101	4.51712e-07	1.04733e-06
AHSA1	0.769523	1.97471e-32	4.04144e-31			C6orf195	-1.53256	1.7843e-24	1.31245e-23
AHSA2	-0.552293	2.72101e-11	1.14698e-10			C6orf226	0.381197	0.000310496	0.000546044
AHSP	-0.0617561	0.000541157	0.00107629			C6orf3	-1.7379	1.91515e-50	5.46581e-49
AICDA	0.0718299	0.00611071	0.0103694			C6orf99	2.53293	8.89958e-72	8.61792e-70
AIFM2	-1.11699	2.27531e-18	1.66503e-17			C7orf34	-0.484291	0.00323069	0.00504188
AIP	0.271222	0.000826292	0.00160025			C7orf55	-0.217552	0.0249287	0.0343751
AIPL1	0.0180931	0.00304348	0.00542071			C7orf63	-0.548031	1.9492e-05	3.89192e-05
AJ003147.9	0.0572214	1.01574e-05	2.50958e-05			C7orf73	0.366779	4.02566e-10	1.19733e-09
AJ006998.2	-0.127633	0.000895742	0.00172759			C8orf44-SGK3	-0.274276	0.0175683	0.0247929
AJAP1	-0.125317	1.20608e-06	3.30266e-06			C8orf46	-0.76257	2.52708e-06	5.48461e-06
AK2	0.482591	6.92068e-15	3.90675e-14			C8orf47	-2.65452	1.89681e-30	1.90982e-29
AK3	-0.874497	1.97068e-27	2.79826e-26			C8orf56	-0.723381	3.50707e-07	8.22189e-07
AK3P2	-0.0360927	0.00027992	0.000577915			C8orf59	0.242905	0.00184978	0.00297045
AK3P3	-0.122774	0.00402397	0.0070391			C8orf76	0.831375	1.07108e-22	7.14694e-22
AK4	-0.944016	1.21633e-15	7.25853e-15			C8orf82	0.545298	5.77936e-08	1.4467e-07
AK4P3	0.0812491	0.0131174	0.0210287			C8orf88	-2.5148	4.45326e-64	2.68343e-62
AK5	-2.321	3.60238e-34	8.31056e-33			C9orf139	0.39789	0.000861784	0.00144055
AK7	-0.327982	3.84705e-22	3.7126e-21			C9orf147	-0.259483	0.0130404	0.0187121
AK8	-0.260904	7.40062e-09	2.52696e-08			C9orf16	0.462407	1.54219e-06	3.41804e-06
AKAP1	-0.38155	9.70809e-06	2.40508e-05			C9orf169	2.07905	4.38867e-46	9.83104e-45
AKAP10	-0.545756	5.05688e-19	3.87315e-18			C9orf173	0.780506	8.89714e-06	1.83584e-05
AKAP11	-0.932974	4.34616e-25	5.23868e-24			C9orf37	0.336905	8.13206e-06	1.683e-05
AKAP7	-0.404811	2.44896e-13	1.21946e-12			C9orf40	-0.557231	6.83845e-12	2.30747e-11
AKIP1	0.153571	0.00755459	0.0126459			CA3	-4.43155	1.70404e-68	1.36313e-66
AKIRIN2	0.1242	0.00695913	0.0117121			CA5A	0.431493	0.000388309	0.000675313
AKR1A1	0.510773	3.80092e-11	1.58426e-10			CA8	-0.592325	0.0168452	0.0238321
AKR1C5P	-0.0419894	0.0023177	0.00420362			CABP1	-2.03018	2.62613e-57	1.05804e-55
AKR1C6P	0.0732785	0.000131457	0.00028331			CABP7	0.973489	1.91401e-10	5.8252e-10
AKR1C7P	0.148954	1.58504e-08	5.25273e-08			CACNA1C-AS1	-0.413993	0.00374428	0.00579489
AKR1E2	0.617917	2.80975e-17	1.89975e-16			CACNA1C-AS2	-0.39496	0.00746688	0.0110862
AKR7A2	-0.197627	0.00450768	0.00782213			CACNA1G-AS1	-0.670892	9.38033e-06	1.9302e-05
AKR7A2P1	0.0832496	0.000208301	0.000437159			CACYBPP2	0.658723	1.20354e-09	3.44558e-09
AKR7A3	-0.818378	4.15321e-10	1.5789e-09			CADM4	0.726268	3.65001e-11	1.16928e-10
AKT1	0.333752	2.3684e-07	7.00944e-07			CAHM	-1.34964	6.66928e-21	4.01787e-20
AKT1S1	0.442287	9.48175e-16	5.70973e-15			CALB2	-3.02127	1.98364e-40	3.2528e-39
AKT3-IT1	-0.0597917	4.60876e-05	0.000105283			CALHM1	1.52149	1.57131e-12	5.54397e-12
AL021068.1	-0.52199	3.69118e-13	1.81374e-12			CALM2P2	-0.797746	4.77246e-12	1.62405e-11
AL022341.3	0.126572	0.00540452	0.00925815			CALML3-AS1	-0.981847	6.73524e-08	1.67806e-07
AL022344.4	0.210338	2.62988e-05	6.19525e-05			CALR4P	0.512412	0.00124278	0.00203756
AL022344.7	-0.0880911	0.00199015	0.00364162			CALY	0.836063	0.000206681	0.00037046
AL022345.7	-0.200184	8.36072e-06	2.08603e-05			CAMK2N1	0.463401	0.00050936	0.000874646
AL022345.8	-0.050189	0.0135496	0.0216644			CAMK2N2	2.35227	4.2685e-35	5.41868e-34
AL022476.2	-0.0742363	4.20949e-06	1.08458e-05			CAMP	2.82827	5.04541e-28	4.51502e-27
AL031768.1	-0.205483	8.61252e-06	2.14694e-05			CAP1	0.201002	0.000105892	0.000195794
AL033378.1	-0.119525	0.00126883	0.00239382			CAP1P2	0.618043	1.16284e-06	2.60402e-06
AL035610.1	-0.959023	2.21192e-36	5.9722e-35			CAPN10-AS1	0.903632	1.05809e-21	6.66691e-21
AL049747.1	0.0501235	2.136e-05	5.08073e-05			CAPN5	-0.950379	1.88688e-15	8.07601e-15
AL050327.1	-0.197408	0.000228466	0.000476707			CAPNS1	0.183197	0.00448132	0.00686324
AL109754.1	-0.120783	0.0333364	0.0497222			CAPNS2	-1.14322	7.32885e-10	2.13221e-09
AL109761.5	0.524615	7.39787e-09	2.52626e-08			CAPS	1.60137	5.04325e-25	3.83215e-24
AL109947.2	-0.125224	4.06036e-09	1.41871e-08			CARHSP1	0.19574	0.00539286	0.00816906
AL121578.2	-0.0264163	0.0108837	0.0177			CASC11	-0.918798	1.18996e-10	3.66892e-10
AL121656.5	0.0432587	0.00829477	0.0137837			CASC14	-1.04205	5.87096e-11	1.85385e-10
AL121753.1	-0.0910704	6.37998e-05	0.000143117			CASC15	-0.546904	5.11212e-06	1.08036e-05
AL121761.2	-0.0567422	0.00108274	0.00206454			CASC16	1.79419	8.29396e-11	2.59285e-10
AL122127.1	0.488547	3.96916e-05	9.15148e-05			CASC8	-2.79614	3.37117e-37	4.70362e-36
AL122127.2	0.707682	5.54755e-07	1.57717e-06			CASK-AS1	0.506603	9.0161e-05	0.000168012
AL122127.25	0.135486	0.00137354	0.00257885			CASP12	-2.22497	8.7995e-49	2.28241e-47
AL122127.3	0.530593	0.000546767	0.00108674			CASP16	1.3467	5.47981e-12	1.85766e-11
AL122127.5	0.32583	4.23296e-05	9.72036e-05			CASP1P2	-1.26891	8.54308e-11	2.66861e-10
AL133245.2	-0.0191022	0.0133336	0.0213481			CBR3	-0.295556	0.0307344	0.0418042
AL133493.2	0.250815	5.05896e-06	1.29113e-05			CBR3-AS1	0.815838	2.59902e-13	9.70868e-13
AL136303.1	0.112891	0.0188455	0.0293819			CBWD2	0.316467	6.0233e-11	1.9e-10
AL136419.6	-0.0656837	0.00166625	0.00308627			CBWD6	-0.728087	3.96968e-05	7.66228e-05
AL136985.1	-0.325354	7.6268e-11	3.09607e-10			CBX3P2	-1.21734	1.49727e-26	1.23903e-25
AL138706.1	-0.148837	1.89932e-05	4.54922e-05			CBX3P4	0.314812	0.014984	0.0213181
AL138935.1	0.0353739	1.18951e-08	3.99132e-08			CBX3P9	0.703146	3.96504e-10	1.18019e-09
AL139022.1	-0.0841473	0.000262106	0.000542859			CBX6	-0.624404	7.57334e-09	2.03812e-08
AL139147.1	0.0931222	0.00147002	0.00274654			CBY3	0.576066	6.6069e-06	1.37904e-05
AL139377.1	-0.152122	0.000355732	0.000724018			CCDC11	0.832157	8.54553e-13	3.06861e-12
AL157871.2	-0.0911268	0.000675407	0.00132479			CCDC122	-0.544875	1.04725e-07	2.56315e-07
AL160471.6	0.0331767	3.11292e-06	8.14252e-06			CCDC124	0.607026	1.86162e-08	4.85576e-08
AL161668.5	-0.210874	7.7115e-05	0.000171257			CCDC130	0.222841	0.00698706	0.0104209
AL162151.3	-0.406561	3.93927e-05	9.08716e-05			CCDC134	0.281108	0.000223756	0.000399432
AL162759.1	-0.0757299	2.01617e-05	4.81204e-05			CCDC135	1.08322	1.05588e-06	2.37047e-06
AL163636.6	-0.506591	2.67885e-47	1.55237e-45			CCDC13-AS1	-0.359638	0.00659384	0.00986859
AL163953.3	-0.108358	1.21133e-10	4.82968e-10			CCDC147	-1.06474	1.03124e-15	4.48151e-15
AL358815.1	-0.14361	0.000736079	0.00143615			CCDC177	0.550756	0.0109467	0.0158754
AL359753.1	0.149799	0.000356271	0.000725075			CCDC183-AS1	0.991174	2.11027e-19	1.16549e-18
AL359878.1	0.127923	1.47578e-09	5.36152e-09			CCDC19	2.52648	3.91315e-53	1.26458e-51
AL360004.1	0.0153291	0.000672186	0.0013189			CCDC41	0.447767	4.63801e-13	1.70145e-12
AL360176.1	-0.119359	0.0125048	0.0201272			CCDC54	-0.971719	2.4607e-14	9.82501e-14
AL365202.1	-0.3298	1.31114e-16	8.4362e-16			CCDC58	0.466933	6.04935e-15	2.51241e-14
AL390877.1	-0.219453	0.0258925	0.0394491			CCDC59	-0.222467	2.31394e-05	4.58633e-05
AL391380.1	-0.140752	0.00163886	0.00303925			CCDC64	2.98062	7.7987e-100	7.68673e-97
AL391384.1	0.0960452	0.0316146	0.0473467			CCDC71L	-0.774366	2.58168e-19	1.41931e-18
AL391421.1	-0.190301	0.00104403	0.001995			CCDC85C	0.258043	0.000798921	0.00133977
AL445665.1	-0.0154392	6.07017e-07	1.71797e-06			CCDC89	-1.02335	3.66791e-13	1.35638e-12
AL450992.2	-0.276128	0.00500137	0.00861368			CCDC96	1.03804	3.7935e-19	2.06007e-18
AL589743.1	0.132669	1.88302e-08	6.20018e-08			CCL17	0.747659	0.000270357	0.000478473
AL590708.2	0.0278022	0.00348483	0.00615124			CCL2	-1.10743	2.23628e-12	7.80536e-12
AL590762.6	0.0853023	0.0037857	0.00664974			CCL25	0.550518	0.000758881	0.00127674
AL590762.7	0.0798564	1.98165e-07	5.89835e-07			CCL7	1.69839	2.06862e-11	6.74263e-11
AL591377.1	-0.146182	1.44231e-05	3.50482e-05			CCL8	-1.24874	8.26745e-10	2.39392e-09
AL591704.5	0.0208698	0.000299082	0.00061528			CCNA1	-0.877746	9.69439e-07	2.18405e-06
AL592494.5	-0.207593	4.45764e-13	2.17512e-12			CCNB2	2.49452	2.55815e-66	1.76499e-64
AL592528.1	0.0795704	0.00183194	0.00337294			CCND2-AS1	-1.7136	2.37001e-30	2.36983e-29
AL645728.1	0.0767886	0.0145316	0.023128			CCNG1	-0.722468	4.56117e-23	3.11505e-22
AL662800.1	-0.697212	3.45318e-15	1.99285e-14			CCNI	-0.236501	5.9299e-06	1.24442e-05
AL672183.2	-0.054555	0.00211162	0.00385266			CCNL1	-0.826055	6.32358e-33	7.20852e-32
AL672294.1	0.0881438	3.27086e-11	1.37022e-10			CCNT2-AS1	-0.329762	5.94252e-06	1.24688e-05
AL713999.1	0.0949494	0.0326483	0.0487797			CCRN4L	0.289882	0.0162394	0.0230175
AL773604.8	0.0806407	4.34865e-05	9.96906e-05			CCT5P1	0.342392	0.00236245	0.00375072
AL807752.1	-0.128578	0.00865454	0.0143429			CCT6P2	0.300658	0.00596215	0.00897525
AL928742.1	0.463367	7.47262e-06	1.87536e-05			CD14	-0.744459	5.13639e-11	1.62842e-10
AL928768.3	-0.330878	0.00105207	0.00200986			CD160	-0.518377	1.81065e-05	3.62681e-05
ALAD	-1.27736	5.87767e-52	4.86911e-50			CD164L2	-1.4716	1.2194e-10	3.75758e-10
ALCAM	-0.790893	1.67769e-05	4.04122e-05			CD209	-2.64776	3.14643e-44	6.35224e-43
ALDH16A1	0.309105	0.000572443	0.00113455			CD24	1.03739	4.81747e-06	1.02044e-05
ALDH1A2	-1.33188	4.05612e-57	4.94467e-55			CD80	1.82963	1.66418e-30	1.68234e-29
ALDH1B1	0.802246	4.68759e-17	3.11396e-16			CD81	-0.409246	1.05654e-09	3.03702e-09
ALDH1L1	-1.6294	5.88339e-32	1.16803e-30			CD81-AS1	-0.93389	8.63291e-15	3.55334e-14
ALDH1L1-AS2	-0.687711	2.21015e-21	2.02107e-20			CD82	-0.547876	2.69176e-05	5.29865e-05
ALDH1L2	0.459638	1.16052e-07	3.53568e-07			CD8BP	-1.2346	4.50378e-10	1.33436e-09
ALDH2	-2.09369	1.13407e-32	2.37431e-31			CD99P1	0.321226	3.15707e-05	6.16448e-05
ALDH3B1	0.216274	0.00377932	0.00663949			CDC20	2.90555	6.68145e-73	6.90616e-71
ALDH3B2	-0.820142	0.00113237	0.00215288			CDC20P1	-2.07184	1.7594e-43	3.43637e-42
ALDH5A1	-0.413987	3.09967e-07	9.04659e-07			CDC34	0.42829	5.45017e-07	1.25596e-06
ALDH6A1	-1.35703	8.55866e-38	2.55917e-36			CDC42	0.197095	2.24147e-05	4.44877e-05
ALDH7A1	-0.420886	8.32836e-08	2.57611e-07			CDC42EP5	-0.894872	2.38377e-09	6.67694e-09
ALDH9A1	-0.443031	1.2274e-07	3.72915e-07			CDC42SE2	-0.285574	3.34665e-07	7.85984e-07
ALDOAP1	0.0123073	0.0213607	0.033004			CDIPT-AS1	1.96267	4.26179e-20	2.45189e-19
ALDOAP2	0.0234664	0.0328306	0.0490308			CDK2AP2	0.767057	4.19314e-14	1.65152e-13
ALDOC	-1.64524	1.09888e-24	1.28544e-23			CDK2AP2P2	0.698598	3.95982e-05	7.64539e-05
ALG1	0.338644	2.99665e-11	1.25838e-10			CDKN1C	-2.23224	9.35755e-62	4.87264e-60
ALG11	-0.283951	3.59549e-10	1.37505e-09			CDKN2AIPNL	0.426388	6.50452e-09	1.76199e-08
ALG13-AS1	-0.461903	2.5428e-12	1.16409e-11			CDKN2B	-0.387986	0.000877228	0.00146504
ALG1L	0.501558	4.04359e-06	1.04427e-05			CDKN2B-AS1	1.60861	3.73471e-31	3.92052e-30
ALG1L11P	-0.0867711	0.000175087	0.000370977			CDKN2C	-1.11889	6.8952e-28	6.10503e-27
ALG1L15P	0.0245043	0.00214151	0.00390212			CDKN3	2.54902	5.34052e-75	6.46437e-73
ALG1L3P	0.234031	1.11961e-08	3.76925e-08			CDNF	-1.27702	2.43555e-33	2.83613e-32
ALG1L5P	0.134029	2.44271e-05	5.77335e-05			CDR2L	0.532802	2.14072e-10	6.49656e-10
ALG1L6P	-0.174426	0.012104	0.0195243			CDRT4	-0.898973	2.05888e-10	6.25438e-10
ALG1L8P	0.111286	0.00236052	0.00427638			CDSN	1.06483	3.86106e-05	7.46357e-05
ALG8	0.267063	0.000572634	0.00113487			CDT1	2.06463	2.45393e-44	4.98701e-43
ALG9	-0.342345	2.28253e-18	1.66997e-17			CDX1	0.834175	3.94028e-09	1.08505e-08
ALKBH3-AS1	-0.0655082	0.000134378	0.000289246			CEBPA	-1.39733	2.69441e-27	2.31076e-26
ALKBH4	0.474705	1.42211e-13	7.21846e-13			CEBPA-AS1	-1.12446	1.9603e-16	8.90835e-16
ALKBH6	0.21482	3.29071e-11	1.37838e-10			CEBPB	-0.639737	2.36171e-09	6.6171e-09
ALMS1-IT1	0.292462	2.92669e-11	1.22986e-10			CEBPD	-0.884525	3.45726e-09	9.57007e-09
ALOX12B	0.057176	0.0149013	0.0236677			CEBPE	1.0349	3.22254e-15	1.36112e-14
ALOX12P1	-0.0114884	0.00347177	0.00613051			CEBPZ	-0.124024	0.00717999	0.0106873
ALOX5AP	0.253488	0.0307853	0.0462065			CEBPZ-AS1	-0.282	2.28044e-05	4.52285e-05
ALPK2	0.128398	0.00193101	0.00353997			CECR5-AS1	-0.53555	2.85853e-05	5.60934e-05
ALPL	-0.799627	8.05045e-08	2.4929e-07			CECR7	-2.26472	2.2765e-30	2.27881e-29
ALS2CR12	-0.126312	2.79075e-12	1.27376e-11			CELF2-AS1	-1.64755	4.28814e-17	2.02852e-16
ALX1	0.246209	0.000693068	0.00135768			CELF5	-1.16303	1.00394e-05	2.05952e-05
ALX3	0.338024	5.76563e-10	2.16612e-09			CENPA	2.58505	3.5228e-61	1.79377e-59
ALYREF	1.78746	4.63118e-49	3.08041e-47			CENPBD1P1	0.13849	0.0101499	0.0148022
AMBP	-0.357964	6.90071e-09	2.36335e-08			CENPCP1	-0.268636	0.0309425	0.0420687
AMD1P1	-0.0415452	0.000571088	0.00113218			CENPH	0.840092	2.73874e-22	1.78601e-21
AMDHD2	0.176783	0.0197056	0.0306311			CENPM	2.59498	2.14683e-68	1.67842e-66
AMFR	-0.620055	4.4099e-22	4.23671e-21			CENPU	2.07603	3.74209e-59	1.67653e-57
AMH	0.532315	7.21444e-11	2.93325e-10			CENPV	-0.818194	6.54911e-08	1.63258e-07
AMIGO2	-2.30795	2.22432e-36	6.00121e-35			CEP164P1	-1.20466	4.07982e-18	2.07281e-17
AMMECR1	0.655782	3.72565e-22	3.59926e-21			CERS6-AS1	1.31456	1.2914e-22	8.59209e-22
AMN	0.194676	1.17377e-07	3.57366e-07			CES4A	-0.50486	0.00434451	0.00666591
AMOTL2	-1.40205	1.7432e-34	4.1206e-33			CETN4P	-1.58247	5.50991e-29	5.19872e-28
AMPD2	0.613028	1.32604e-17	9.18026e-17			CFD	-3.07577	3.65147e-43	7.01764e-42
AMPD3	0.138374	0.0189266	0.0294919			CFL1P1	-0.411411	2.14921e-05	4.27395e-05
AMT	-0.837143	5.45825e-24	6.07862e-23			CFL1P5	1.10114	3.0795e-23	2.12949e-22
AMTN	0.548055	2.07108e-06	5.53168e-06			CFLAR-AS1	-1.3034	3.4481e-17	1.64183e-16
AMY1B	0.0104277	0.0115954	0.0187612			CGB7	-1.64115	2.19877e-26	1.80386e-25
AMY2B	-0.726922	8.82695e-33	1.85656e-31			CGGBP1	-0.145276	0.00385054	0.00595002
AMZ2	0.246712	2.34757e-05	5.55823e-05			CHAC2	0.375818	9.15034e-05	0.000170422
AMZ2P1	-0.38333	5.08041e-12	2.26826e-11			CHCHD10	-0.557385	4.97385e-07	1.14888e-06
ANAPC10	-0.118916	0.00308453	0.00548926			CHCHD2P2	0.524929	0.00168046	0.00271054
ANAPC11	1.0974	1.76526e-29	2.90885e-28			CHCHD2P6	-0.239443	0.0106887	0.0155207
ANAPC13	-0.155752	0.0051766	0.00889572			CHCHD2P9	0.698271	3.03562e-05	5.93949e-05
ANAPC15	0.250198	2.79661e-07	8.20942e-07			CHCHD4	0.130265	0.0297849	0.0405928
ANAPC16	-0.386294	3.64573e-12	1.64892e-11			CHCHD5	0.825005	4.99702e-20	2.85997e-19
ANAPC1P1	0.0281773	0.00872895	0.0144583			CHKB-AS1	0.796146	5.43306e-13	1.98283e-12
ANAPC7	0.537932	5.11486e-23	5.28898e-22			CHKB-CPT1B	0.304613	0.0197516	0.0276492
ANG	-1.43191	7.86849e-36	2.04133e-34			CHL1-AS2	-3.20277	6.66038e-74	7.35252e-72
ANGPTL1	-2.37473	3.07397e-62	5.38683e-60			CHMP1A	0.297098	0.000110385	0.00020369
ANGPTL2	-2.03835	5.37293e-42	2.15924e-40			CHMP1B	-0.18347	0.000129663	0.000237659
ANGPTL5	-0.56793	3.93367e-15	2.26012e-14			CHMP4BP1	0.725056	7.93217e-07	1.79997e-06
ANGPTL6	0.212469	3.44821e-16	2.14703e-15			CHMP5	0.418907	4.37072e-12	1.49175e-11
ANKDD1A	-0.601664	1.94367e-20	1.65607e-19			CHMP6	0.217552	0.00542685	0.00821604
ANKDD1B	-0.269942	9.89521e-31	1.78378e-29			CHRAC1	0.260906	7.65151e-05	0.000143563
ANKHD1-EIF4EBP3	-0.148164	2.45159e-14	1.32838e-13			CHRM3-AS2	-0.695874	0.000332574	0.000582939
ANKLE1	0.449161	4.24108e-14	2.24867e-13			CHRM5	-0.347506	0.00200114	0.00319992
ANKLE2	0.17393	0.000232518	0.000484663			CHST13	0.518992	0.00125381	0.00205504
ANKRD1	0.609809	1.22106e-06	3.34066e-06			CHST14	0.171308	0.00332591	0.00518315
ANKRD10-IT1	-0.289529	0.011749	0.0189887			CHTF8	-0.297019	1.88587e-09	5.32443e-09
ANKRD13A	-0.187941	0.00468126	0.00809911			CHURC1-FNTB	-0.551954	8.67293e-06	1.79132e-05
ANKRD13B	0.742122	1.861e-13	9.3628e-13			CICP16	-0.465095	0.00447472	0.00685427
ANKRD16	0.427294	3.43063e-10	1.31503e-09			CICP22	0.457031	0.000392053	0.000681386
ANKRD20A10P	0.0582321	6.4947e-07	1.83328e-06			CIDEC	-6.01157	2.02607e-49	5.43925e-48
ANKRD20A11P	-0.168791	4.89106e-13	2.37832e-12			CIRBP-AS1	0.602368	2.87758e-10	8.65374e-10
ANKRD20A17P	-0.055575	9.32147e-14	4.80577e-13			CISD1	0.210737	0.00605165	0.00910055
ANKRD20A18P	0.0720859	0.00085547	0.00165368			CISD2	0.548704	3.72342e-22	2.41275e-21
ANKRD20A19P	0.0203841	0.0201246	0.0312371			CITF22-1A6.3	0.626987	7.85179e-10	2.27859e-09
ANKRD20A5P	-0.156379	5.53772e-08	1.74324e-07			CKLF-CMTM1	0.526507	8.00608e-08	1.9811e-07
ANKRD20A7P	-0.0775777	3.29675e-07	9.59798e-07			CKM	0.527235	0.00304796	0.00477643
ANKRD24	-0.272459	2.49681e-20	2.11157e-19			CKMT2-AS1	-0.617888	1.70319e-21	1.06082e-20
ANKRD26P4	-0.0392044	0.00144045	0.0026957			CKS2	2.307	1.77873e-82	3.80538e-80
ANKRD30BP1	-0.0774244	3.78869e-10	1.44605e-09			CLDN20	-0.364927	0.0138441	0.0197861
ANKRD30BP3	0.13976	1.28374e-05	3.13706e-05			CLDN3	1.94062	1.67813e-23	1.17965e-22
ANKRD31	-0.113498	1.53043e-15	9.06322e-15			CLDN7	1.52697	1.83565e-41	3.20027e-40
ANKRD33	-0.0103146	0.0190452	0.0296678			CLEC12B	-0.349322	0.0243866	0.0336814
ANKRD33B	-0.449852	2.12005e-10	8.2772e-10			CLEC2B	-0.684681	5.87899e-10	1.72385e-09
ANKRD37	-0.188041	0.00755898	0.0126509			CLEC2L	-1.47308	2.06965e-16	9.38057e-16
ANKRD39	0.433386	1.44497e-14	7.97534e-14			CLEC3A	2.51572	0.000144314	0.000263255
ANKRD40	-0.991674	1.31609e-31	2.53684e-30			CLEC3B	-3.40784	5.37565e-89	1.9781e-86
ANKRD46	-0.323318	6.79974e-08	2.12154e-07			CLEC5A	2.82949	2.77735e-52	8.61229e-51
ANKRD53	-0.830971	1.26971e-27	1.83219e-26			CLIC1P1	0.292906	0.0106621	0.0154853
ANKRD62	0.0286376	0.0010608	0.00202546			CLMP	-2.32952	8.14976e-54	2.7496e-52
ANKRD62P1	-0.0695183	0.013371	0.0213995			CLN8	-0.558858	1.14211e-14	4.66201e-14
ANKRD63	0.0252942	0.00380601	0.0066838			CLPS	1.76601	2.23304e-13	8.38011e-13
ANKRD65	-1.02299	3.19094e-21	2.88466e-20			CLPSL1	2.21064	1.76031e-14	7.09525e-14
ANKS3	0.192533	0.00140518	0.0026339			CLRN1-AS1	1.81353	1.32402e-18	6.94552e-18
ANO1-AS2	-0.209536	1.72886e-11	7.41727e-11			CLTB	0.241726	0.0104384	0.0151894
ANO7	0.283711	1.33338e-16	8.57476e-16			CMAHP	-0.470385	0.00102031	0.00169028
ANO7P1	0.163616	8.19904e-05	0.000181432			CMC1	0.417838	1.69527e-13	6.40819e-13
ANP32A	0.361468	5.13464e-11	2.11215e-10			CMC2	0.317678	2.89317e-05	5.67408e-05
ANP32AP1	0.0558691	0.00764781	0.0127838			CMPK1	-0.487145	7.11407e-19	3.7953e-18
ANP32B	0.670052	4.85861e-15	2.7706e-14			CMTM1	0.265543	0.0104998	0.0152721
ANP32BP1	0.0384876	6.98349e-05	0.000155906			CNBP	-0.284669	9.92701e-12	3.30996e-11
ANP32C	0.0266833	0.00312499	0.00555584			CNEP1R1	-0.321613	4.30754e-08	1.08934e-07
ANTXR1	-0.288632	0.00642837	0.0108725			CNN2P9	-0.805267	9.30082e-13	3.33096e-12
ANXA1	-1.73478	1.5336e-30	2.72815e-29			CNOT6L	-0.401228	3.39006e-10	1.01419e-09
ANXA11	-0.651991	1.1503e-19	9.26188e-19			CNOT6LP1	-0.747746	1.91756e-07	4.59502e-07
ANXA2R	0.172435	0.00718129	0.0120598			CNOT7	-0.241665	0.000155541	0.000282576
ANXA6	-0.931012	4.55955e-20	3.78491e-19			CNR1	-2.50534	6.90855e-24	4.94969e-23
ANXA9	-0.810944	4.64994e-14	2.45923e-13			CNTF	-0.825153	2.88728e-12	9.9954e-12
AOC1	0.366798	4.31086e-14	2.28421e-13			COA3	0.519258	2.15789e-10	6.5472e-10
AOC4P	-0.38586	1.37985e-28	2.12217e-27			COCH	-0.790916	0.000853462	0.00142707
AP000221.1	0.039485	0.000474965	0.000951921			COL21A1	-1.22381	4.3067e-12	1.47118e-11
AP000230.1	0.178827	0.000135512	0.000291513			COL4A2-AS1	-1.6363	2.32776e-33	2.71634e-32
AP000240.9	0.158921	8.12479e-05	0.000179877			COLCA2	-2.07057	2.72893e-36	3.65065e-35
AP000251.3	1.06483	1.16059e-34	2.76493e-33			COMMD3-BMI1	0.844915	2.21291e-06	4.82629e-06
AP000254.8	-0.254196	3.18951e-05	7.43953e-05			COMMD6	-0.529648	3.92954e-12	1.34767e-11
AP000255.6	-0.130969	0.000141154	0.000303007			COMMD8	0.258209	5.10366e-05	9.75219e-05
AP000265.1	0.0199005	0.00242884	0.00439382			COMTD1	1.27001	5.12133e-20	2.92869e-19
AP000266.7	-0.0801258	0.0109475	0.0177951			COPE	0.956961	1.0548e-27	9.259e-27
AP000275.65	0.0799877	0.000218584	0.000457423			COPS2	-0.361252	1.01196e-10	3.14046e-10
AP000282.3	-0.0426475	4.5689e-10	1.73097e-09			COPZ1	0.56091	1.17796e-26	9.79785e-26
AP000295.10	-0.0605984	0.00519352	0.00892144			COQ2	0.323914	1.73082e-06	3.81589e-06
AP000295.9	-0.0431173	8.80316e-05	0.000193921			COQ4	0.505621	2.85278e-13	1.06264e-12
AP000320.6	0.0869191	5.68371e-06	1.4423e-05			COQ7	0.315832	1.19547e-07	2.91505e-07
AP000330.8	0.158635	0.000968735	0.00185932			COX17P1	0.845006	3.82864e-10	1.14045e-09
AP000347.2	-0.0746521	0.000125249	0.00027081			COX18	0.122812	0.03404	0.0460147
AP000350.10	0.0150161	6.50535e-05	0.000145777			COX20P1	0.847683	0.00139914	0.00227983
AP000350.5	-0.115473	0.000655158	0.00128757			COX4I1	-0.309369	0.000454106	0.00078357
AP000350.8	-0.11175	0.00221817	0.00403173			COX5BP6	-0.426807	0.000764681	0.00128579
AP000351.3	-0.230958	4.41885e-05	0.000101236			COX6A1P2	0.673072	1.90719e-10	5.80509e-10
AP000357.4	0.0535703	1.17225e-07	3.56932e-07			COX6A2	1.0692	2.19011e-07	5.22092e-07
AP000436.4	-0.051121	5.04524e-10	1.90391e-09			COX6B1	0.471956	3.84309e-09	1.05934e-08
AP000439.1	-0.0485238	1.40265e-06	3.81456e-06			COX6B1P5	0.874706	4.62792e-12	1.57642e-11
AP000439.2	-0.232262	1.87064e-21	1.71794e-20			COX6B2	-0.856677	0.00026273	0.000465392
AP000439.3	-0.484727	2.69807e-13	1.33966e-12			COX6CP1	1.18112	0.00110994	0.00183021
AP000439.5	0.121224	0.0125795	0.0202414			COX7A1	-2.14266	2.49263e-43	4.82071e-42
AP000442.4	-0.111577	8.12581e-13	3.87475e-12			COX7B	0.224162	0.00106	0.00175277
AP000445.1	-0.481158	1.091e-21	1.01758e-20			CPB2-AS1	-1.00563	3.87001e-10	1.1524e-09
AP000473.5	-0.698237	1.91259e-24	2.20474e-23			CPEB2-AS1	0.66397	4.51709e-06	9.59164e-06
AP000473.8	-0.503356	6.57776e-36	1.71994e-34			CPHL1P	-1.14719	0.000402683	0.000699211
AP000476.1	-0.0232865	0.0253736	0.038712			CPLX1	0.746853	9.18087e-08	2.25944e-07
AP000487.5	0.0837265	0.00318895	0.00566211			CPNE9	0.890499	4.69952e-10	1.39011e-09
AP000487.6	0.237976	1.197e-06	3.27927e-06			CPO	-0.588729	3.82407e-05	7.39519e-05
AP000525.10	0.0662693	0.00682867	0.0115074			CPOX	-0.14155	0.012193	0.0175673
AP000525.9	0.566012	7.66164e-14	3.97702e-13			CPSF3L	0.277867	9.6211e-06	1.97797e-05
AP000569.9	0.0663193	2.77356e-06	7.30252e-06			CRABP2	1.88479	1.35918e-25	1.06686e-24
AP000580.1	0.253097	7.82644e-07	2.18953e-06			CRB3	2.09732	5.33317e-66	3.60747e-64
AP000593.5	0.0401587	0.0143656	0.0228835			CREB3	0.441091	4.27669e-11	1.36386e-10
AP000593.7	0.0714514	0.0128525	0.020645			CREG1	-0.422413	5.04886e-12	1.7162e-11
AP000620.1	0.0785165	2.14115e-09	7.67404e-09			CREG2	1.00682	4.83666e-11	1.53604e-10
AP000640.10	-0.0482286	0.0075568	0.0126485			CRHR1-IT1	-0.401867	1.22504e-06	2.736e-06
AP000640.2	0.0481397	2.65293e-05	6.24512e-05			CRIP1	1.63715	6.19447e-26	4.95091e-25
AP000654.4	-0.0570617	1.58302e-07	4.75611e-07			CRIP2	0.741217	3.27469e-09	9.07835e-09
AP000654.5	-0.139622	3.66535e-21	3.29881e-20			CRIP3	-0.549881	0.00173593	0.00279576
AP000662.4	-0.106672	0.002499	0.00451091			CRISP3	1.18152	0.00290407	0.00456234
AP000662.9	0.10703	0.000113043	0.000245775			CRNDE	0.489918	2.72248e-08	6.99993e-08
AP000688.11	0.0304691	0.000131978	0.00028433			CRYGN	-1.2864	1.22361e-15	5.29462e-15
AP000688.8	1.28442	1.66536e-12	7.74659e-12			CRYGS	-0.246442	0.011053	0.0160227
AP000692.10	0.110713	0.000710247	0.00138879			CRYZP1	-0.532351	0.000947023	0.00157588
AP000695.4	0.269404	2.59114e-15	1.5126e-14			CSK	0.667522	1.54983e-24	1.14333e-23
AP000695.6	0.273351	6.60385e-09	2.26508e-08			CSNK1D	0.313691	4.96667e-09	1.35928e-08
AP000696.2	0.350063	6.4475e-14	3.37127e-13			CSNK1G2-AS1	0.366212	0.00524527	0.0079586
AP000697.6	0.170652	1.12809e-12	5.31388e-12			CSNK2B	0.454656	9.92235e-10	2.85783e-09
AP000704.5	0.358376	2.61505e-14	1.41401e-13			CSPG4P13	-0.73096	8.5132e-06	1.75991e-05
AP000721.4	0.0160759	0.0313691	0.047015			CST4	4.36565	1.09935e-33	1.30214e-32
AP000769.1	0.25021	0.00222507	0.00404327			CST6	1.4685	8.69108e-09	2.32915e-08
AP000783.1	0.116669	0.000382975	0.000776172			CSTB	0.270258	0.00215467	0.00343409
AP000892.4	-0.0699758	5.45625e-09	1.88494e-08			CSTF3-AS1	0.381314	0.00256072	0.00404943
AP000892.8	-0.0166797	0.0232827	0.0357493			CT62	0.965675	2.21444e-05	4.39734e-05
AP001046.5	0.273681	1.79038e-06	4.813e-06			CTA-126B4.7	1.57359	4.77478e-18	2.41743e-17
AP001046.6	0.011513	0.00370446	0.00651644			CTA-134P22.2	-3.6103	1.76672e-43	3.44822e-42
AP001053.11	0.31824	2.07214e-09	7.43547e-09			CTA-14H9.5	-1.39636	2.5025e-27	2.1522e-26
AP001056.1	0.0374151	0.0208646	0.0322992			CTA-204B4.2	-0.347723	0.000112306	0.000207043
AP001058.3	0.0336106	0.000564386	0.00111919			CTA-211A9.5	-0.45256	1.60864e-08	4.21248e-08
AP001062.7	0.229557	3.35193e-06	8.74261e-06			CTA-212D2.2	-1.06178	1.15451e-13	4.41855e-13
AP001063.1	0.0474814	0.00133287	0.00250764			CTA-217C2.1	0.286745	0.000154662	0.000281073
AP001065.2	0.4831	5.67256e-08	1.78415e-07			CTA-221G9.11	-1.1909	5.07426e-23	3.4535e-22
AP001065.7	-0.176638	1.30564e-14	7.23153e-14			CTA-221G9.7	-0.411751	0.00113019	0.00186193
AP001172.2	0.121396	0.0314586	0.0471394			CTA-242H14.1	-0.787083	8.2869e-07	1.87722e-06
AP001189.4	-0.637174	3.54743e-29	5.71129e-28			CTA-246H3.11	-0.549366	3.97292e-05	7.66799e-05
AP001257.1	-0.11425	2.65598e-06	7.01322e-06			CTA-246H3.8	-0.40899	0.00307087	0.0048103
AP001258.4	-0.227715	0.000221659	0.000463406			CTA-253N17.1	0.226796	0.0105933	0.0153992
AP001258.5	0.0146782	0.015474	0.0245122			CTA-268H5.14	-0.348876	0.0149184	0.0212302
AP001350.1	-0.0528467	0.00169374	0.00313449			CTA-276F8.2	-0.386873	0.0132025	0.0189309
AP001412.1	0.207895	1.07444e-15	6.44559e-15			CTA-292E10.8	-0.376923	0.00302033	0.00473555
AP001434.2	0.68781	1.23844e-32	2.58244e-31			CTA-293F17.1	-0.987911	3.31339e-09	9.18471e-09
AP001437.1	0.236734	3.48331e-11	1.45587e-10			CTA-313A17.2	0.866918	2.91402e-11	9.40267e-11
AP001439.2	0.116673	0.000900885	0.00173705			CTA-351J1.1	-0.845369	1.05297e-10	3.26198e-10
AP001469.5	-0.124036	0.000215064	0.000450471			CTA-363E19.2	-0.567279	1.68567e-06	3.72228e-06
AP001469.9	0.307737	3.87013e-07	1.12064e-06			CTA-363E6.2	1.10962	1.31503e-06	2.92895e-06
AP001505.9	-0.186183	0.00169076	0.00312912			CTA-384D8.33	0.828827	4.91464e-10	1.45156e-09
AP001604.3	-0.0364375	2.40307e-11	1.01744e-10			CTA-384D8.34	1.21329	1.04157e-11	3.4666e-11
AP001605.4	-0.0191824	5.11462e-05	0.000116184			CTA-384D8.35	1.76143	5.65203e-21	3.42748e-20
AP001610.5	0.0862252	0.00114401	0.00217354			CTA-384D8.36	0.767995	6.2509e-15	2.59495e-14
AP001619.3	0.044006	0.0140117	0.022364			CTA-390C10.10	-1.02506	3.57463e-10	1.06721e-09
AP001626.1	0.486761	0.000236426	0.00049233			CTA-392E5.1	0.899191	0.0110209	0.0159786
AP001626.2	0.0758971	0.000149	0.000318799			CTA-407F11.6	-0.959186	1.44892e-10	4.43957e-10
AP001627.1	-0.487267	1.30446e-25	1.62501e-24			CTA-407F11.8	-2.0391	1.10317e-44	2.27374e-43
AP001628.6	0.18265	0.000237698	0.000494864			CTA-85E5.10	-1.99634	1.08187e-40	1.7954e-39
AP001628.7	-0.111413	6.0067e-10	2.25413e-09			CTA-941F9.9	-2.5092	1.84378e-50	5.27848e-49
AP001631.9	0.33097	9.96812e-15	5.56414e-14			CTA-963H5.5	0.229114	0.0120071	0.0173185
AP001816.1	-0.571169	1.27037e-10	5.05458e-10			CTA-972D3.2	0.609377	1.67732e-05	3.36953e-05
AP002387.1	0.00930268	0.000599173	0.00118386			CTA-984G1.5	0.40013	0.000596677	0.00101567
AP002856.5	-0.0149556	5.7657e-05	0.000130033			CTA-989H11.1	0.453797	5.34148e-05	0.000101862
AP002856.7	-0.0755524	1.64856e-09	5.96427e-09			CTAGE3P	0.363207	0.0185503	0.0260881
AP002884.2	-0.0278466	0.0173846	0.0272697			CTAGE4	0.433563	0.0106387	0.0154554
AP002954.3	-0.377361	3.08274e-17	2.07854e-16			CTAGE7P	0.486008	0.000179685	0.000324241
AP002954.4	0.18065	0.000472355	0.000946945			CTB-102L5.4	0.511742	0.0129104	0.0185361
AP003068.18	0.111591	1.31725e-05	3.21486e-05			CTB-102L5.8	0.412214	0.00177574	0.00285688
AP003068.23	0.29807	2.32621e-05	5.50981e-05			CTB-107G13.1	-1.33826	2.5469e-08	6.56788e-08
AP003068.9	0.280313	6.84814e-12	3.02417e-11			CTB-109A12.1	0.752658	5.90026e-07	1.35516e-06
AP003730.1	-0.136939	0.000463369	0.00092985			CTB-113P19.1	-1.08726	1.33485e-12	4.73103e-12
AP003774.1	0.15541	5.60163e-07	1.59167e-06			CTB-113P19.3	-0.614709	4.19988e-07	9.75824e-07
AP003774.6	-0.0426857	0.0015695	0.00291863			CTB-113P19.4	-1.61442	9.09999e-23	6.09863e-22
AP004372.1	-0.525291	1.22373e-05	2.99483e-05			CTB-113P19.5	-0.293255	0.00399203	0.00615384
AP006216.10	0.0209246	0.0321064	0.0480252			CTB-114C7.3	-1.79674	3.2454e-40	5.25318e-39
AP006222.2	-0.112989	8.42784e-11	3.40722e-10			CTB-114C7.4	1.08438	1.95834e-16	8.90088e-16
AP006547.3	-0.0223702	3.00321e-05	7.02478e-05			CTB-118N6.2	-1.1785	1.2826e-19	7.16975e-19
AP006621.6	-0.34545	1.2035e-05	2.94849e-05			CTB-118N6.3	-1.02906	4.87646e-16	2.16263e-15
AP006621.9	0.0935408	0.0187713	0.0292725			CTB-119C2.1	0.770126	1.60123e-08	4.19506e-08
AP1G1	-0.14537	0.0226291	0.0348147			CTB-129O4.1	0.839685	7.90772e-10	2.2941e-09
AP1M1	0.161236	0.000492168	0.000984066			CTB-129P6.11	0.430953	0.000489673	0.000842729
AP1M2	1.23604	6.66021e-11	2.71731e-10			CTB-131B5.2	-0.542454	0.000171736	0.000310588
AP1S1	1.25065	1.39664e-38	4.39616e-37			CTB-131B5.5	-0.355985	0.0215973	0.0300486
AP1S3	0.465712	6.12077e-11	2.50395e-10			CTB-133G6.2	-0.600487	8.45082e-07	1.91357e-06
AP2B1	-0.360593	2.74753e-06	7.23922e-06			CTB-134F13.1	-0.701837	4.02677e-09	1.10832e-08
AP2S1	0.943872	8.55217e-29	1.33445e-27			CTB-134H23.3	0.491331	0.00860863	0.0126777
AP3M1	-0.284588	2.04352e-05	4.8738e-05			CTB-13F3.1	-0.676839	3.04513e-09	8.46318e-09
AP3M2	0.232146	0.000423709	0.000853789			CTB-152G17.6	-0.691911	9.86955e-11	3.06562e-10
AP3S2	-0.637276	6.90112e-39	2.20848e-37			CTB-161K23.1	-0.394395	0.000370287	0.000645516
AP4B1	0.213654	5.72384e-06	1.45228e-05			CTB-161M19.4	-0.877631	5.46957e-11	1.73087e-10
AP4M1	0.613591	2.78251e-24	3.16649e-23			CTB-167B5.1	-0.521535	5.77876e-05	0.000109813
AP4S1	-0.400313	2.53588e-21	2.30851e-20			CTB-171A8.1	0.481299	0.00458467	0.00700751
AP5M1	-0.336464	5.4312e-11	2.22961e-10			CTB-175E5.7	0.787634	7.07546e-13	2.55821e-12
AP5S1	0.0917809	0.0228109	0.0350737			CTB-175P5.4	1.80514	3.2098e-09	8.90382e-09
AP5Z1	0.522255	2.8225e-14	1.52122e-13			CTB-176F20.3	0.706595	1.38071e-05	2.79607e-05
APBA3	0.429023	3.07385e-12	1.39895e-11			CTB-178M22.2	0.63438	1.41708e-05	2.8672e-05
APBB1	-0.91807	1.71977e-23	1.84262e-22			CTB-179K24.3	1.00525	6.30356e-23	4.26596e-22
APBB1IP	-0.905952	7.926e-14	4.11015e-13			CTB-25B13.9	0.486824	0.000702882	0.00118708
APBB2	-1.24597	2.36079e-43	1.03551e-41			CTB-31O20.2	0.437395	2.06141e-06	4.50727e-06
APBB3	-0.473201	3.46174e-11	1.44702e-10			CTB-31O20.8	0.322494	0.0292371	0.0398954
APCDD1L-AS1	-0.59744	8.18724e-07	2.28556e-06			CTB-32O4.2	-0.47578	6.69239e-05	0.000126219
APEX1	0.363424	7.21301e-08	2.24559e-07			CTB-33G10.1	-0.879507	3.38209e-15	1.42764e-14
APEX2	0.842639	2.18239e-27	3.08566e-26			CTB-36H16.2	-0.871305	2.92372e-14	1.16283e-13
APH1B	-1.22815	1.6393e-56	1.87901e-54			CTB-36O1.7	-0.897333	0.0001889	0.000339958
API5P1	0.016568	0.0284064	0.0429329			CTB-43E15.1	1.41047	5.83056e-11	1.84173e-10
APITD1	0.592986	4.19539e-24	4.70819e-23			CTB-43E15.3	-1.83481	6.41855e-21	3.87105e-20
APITD1-CORT	0.145478	2.11808e-11	9.01703e-11			CTB-43E15.4	-3.63031	1.00008e-50	2.89309e-49
APLNR	-0.714658	9.2121e-09	3.12267e-08			CTB-47B11.3	0.745732	1.55561e-07	3.75703e-07
APLP1	1.07866	9.87207e-18	6.90401e-17			CTB-47B8.1	-0.459789	0.000212331	0.000379897
APLP2	-0.498169	2.64382e-10	1.02268e-09			CTB-49A3.2	0.996082	5.93127e-12	2.00577e-11
APOA1-AS	-0.161184	1.38657e-10	5.50311e-10			CTB-49A3.4	2.40965	5.06056e-34	6.09609e-33
APOA2	0.0815445	0.00315558	0.00560695			CTB-50E14.5	-1.17333	4.75203e-30	4.68213e-29
APOBEC3A	0.376167	8.59768e-09	2.9231e-08			CTB-50L17.9	0.552966	5.92893e-06	1.24431e-05
APOBEC3C	-0.540991	1.68009e-06	4.53019e-06			CTB-54O9.9	0.381411	0.000598361	0.00101841
APOBEC3H	0.325147	3.74842e-09	1.31489e-08			CTB-55O6.10	0.438557	0.000588761	0.00100325
APOC1	1.0609	4.08234e-10	1.55341e-09			CTB-55O6.12	-0.507358	1.87145e-10	5.70007e-10
APOC1P1	0.0814763	0.000161509	0.000343887			CTB-66B24.1	-1.64037	6.70445e-28	5.94185e-27
APOC2	0.15117	8.56524e-08	2.644e-07			CTB-78O21.1	-0.715508	1.34368e-06	2.99055e-06
APOC4-APOC2	0.0515699	2.23864e-06	5.96087e-06			CTB-89H12.4	0.218583	0.0183252	0.0257964
APOD	-4.12711	9.22139e-39	2.92532e-37			CTB-92J24.2	0.889143	8.57565e-10	2.48031e-09
APOE	0.733103	0.000107421	0.000234293			CTB-92J24.3	-2.47614	2.36649e-26	1.93742e-25
APOF	-0.131681	0.000195748	0.000412166			CTBP1-AS2	0.405898	1.51984e-13	5.76081e-13
APOL2	0.231756	0.00487597	0.00841282			CTBP2P4	0.254825	0.0258764	0.0355858
APOL3	-0.882922	2.31513e-13	1.15566e-12			CTBP2P7	0.422527	0.00130888	0.0021411
APOL4	-0.394309	0.00115322	0.00218943			CTBP2P8	-1.43597	1.79048e-26	1.4768e-25
APOL5	-0.0496892	8.80149e-05	0.000193904			CTC-137K3.1	0.477259	0.000495418	0.000851978
APOL6	-0.508803	0.000159368	0.000339666			CTC-203F4.2	-0.772331	1.38881e-14	5.6332e-14
APOLD1	-1.69757	2.60526e-26	3.41834e-25			CTC-205M6.5	-1.09413	3.142e-26	2.55038e-25
APOM	-0.393515	5.68999e-14	2.98718e-13			CTC-210G5.1	-0.541163	0.00204644	0.00326893
APOO	1.15594	4.84005e-38	1.47139e-36			CTC-215O4.4	-1.16784	3.43472e-13	1.27237e-12
APOPT1	0.265451	5.84301e-07	1.65677e-06			CTC-228N24.1	-0.478936	3.60317e-06	7.71094e-06
APPL1	-0.36249	9.45875e-08	2.90677e-07			CTC-228N24.3	-0.233635	0.000402774	0.000699325
APRT	0.718787	1.75911e-12	8.16498e-12			CTC-232H10.1	-0.282778	0.0167556	0.0237114
APTX	0.370936	5.89301e-11	2.4143e-10			CTC-232P5.1	0.535002	0.000141778	0.000258833
AQP1	-2.55024	2.66728e-47	1.54813e-45			CTC-236F12.4	-0.495352	0.00462991	0.00707235
AQP11	-0.217381	1.0198e-06	2.8186e-06			CTC-241F20.3	-0.468805	1.4742e-09	4.19259e-09
AQP4	-0.24374	0.00403402	0.00705532			CTC-246B18.10	0.727915	4.09731e-07	9.53116e-07
AQP4-AS1	-0.0312243	0.00537374	0.00920974			CTC-246B18.8	0.865973	5.83224e-09	1.58595e-08
AQP5	0.988177	0.000305881	0.000628411			CTC-250I14.1	0.41803	0.000655559	0.00111076
AQP6	0.147407	0.000553417	0.00109893			CTC-250I14.3	0.700899	1.12439e-07	2.74781e-07
AQP7	-3.37542	9.44554e-52	7.70224e-50			CTC-251D13.1	-1.20894	4.07257e-23	2.79381e-22
AQP7P1	-1.41767	3.83777e-31	7.14802e-30			CTC-260E6.10	0.88762	1.23747e-08	3.27186e-08
AQP7P2	-0.649659	4.48524e-18	3.21382e-17			CTC-260E6.6	0.562837	2.09842e-05	4.17867e-05
AQP7P4	-0.0605418	6.34371e-09	2.17934e-08			CTC-260F20.3	0.655142	6.69046e-10	1.95286e-09
AQP8	-0.0189218	0.0180052	0.0281585			CTC-273B12.10	1.36922	3.26981e-17	1.55909e-16
AQP9	0.847541	3.0832e-13	1.52549e-12			CTC-276P9.1	2.55769	3.83675e-19	2.08315e-18
AQPEP	-1.38748	7.33679e-29	1.15159e-27			CTC-277H1.7	-0.796314	4.2343e-13	1.55832e-12
AR	-2.26096	1.83475e-40	6.58236e-39			CTC-281F24.1	-0.845421	7.41733e-08	1.84136e-07
ARC	-0.863878	2.595e-15	1.51438e-14			CTC-296K1.3	-1.11497	4.43095e-16	1.97107e-15
AREG	-2.00978	1.69449e-16	1.08216e-15			CTC-296K1.4	-1.32624	8.47238e-24	6.03876e-23
ARF1	1.09364	2.49245e-48	1.55564e-46			CTC-297N7.1	-0.481294	3.19229e-05	6.22709e-05
ARF4	0.487031	3.08596e-15	1.78715e-14			CTC-297N7.11	-0.950849	5.5692e-10	1.63788e-09
ARF4P2	0.0704222	9.19092e-10	3.39387e-09			CTC-297N7.5	-2.46919	1.98406e-68	1.55557e-66
ARF5	0.881865	7.18181e-26	9.13908e-25			CTC-297N7.9	-2.50054	1.40552e-63	8.23559e-62
ARF6	0.262389	0.000288259	0.000594054			CTC-301O7.4	-0.838699	7.08891e-08	1.76363e-07
ARFGAP1	0.862909	3.1514e-24	3.56735e-23			CTC-303L1.2	0.340028	0.0118849	0.0171521
ARFGEF2	-0.259941	0.00474763	0.0082042			CTC-321K16.1	-1.25817	1.17254e-06	2.62468e-06
ARG1	-0.127092	1.8563e-15	1.09468e-14			CTC-325H20.2	-1.04107	2.08904e-12	7.30714e-12
ARG2	0.262968	0.000563806	0.00111822			CTC-325H20.4	-0.346279	1.84307e-05	3.68747e-05
ARGLU1	-0.43919	2.84907e-07	8.35198e-07			CTC-325H20.7	-0.761864	6.57622e-07	1.50415e-06
ARHGAP1	-0.171313	0.00136172	0.00255861			CTC-327F10.4	-0.535455	0.00755466	0.0112075
ARHGAP12	-0.682994	1.78241e-17	1.2226e-16			CTC-327F10.5	-0.462635	0.0144374	0.0205829
ARHGAP19	-0.775632	5.01311e-18	3.57939e-17			CTC-329D1.2	0.299131	0.00118851	0.00195322
ARHGAP20	-1.61269	1.5833e-74	8.24446e-72			CTC-329H14.1	-0.323057	0.00756134	0.0112168
ARHGAP27	0.244932	0.000185452	0.000391642			CTC-332L22.1	-0.549495	2.47208e-06	5.36861e-06
ARHGAP28	-0.231691	8.3995e-06	2.09556e-05			CTC-336P14.1	-0.65095	6.50878e-10	1.90104e-09
ARHGAP31-AS1	0.39472	5.55975e-13	2.68842e-12			CTC-338M12.5	-0.396439	0.00221813	0.00353135
ARHGAP39	1.1335	1.28049e-26	1.71281e-25			CTC-339F2.2	-0.928288	8.0853e-09	2.17081e-08
ARHGAP42P2	-0.0126638	0.0001187	0.000257368			CTC-353G13.1	-1.27513	1.88841e-08	4.92134e-08
ARHGAP5-AS1	-0.525633	6.95825e-13	3.33721e-12			CTC-359D24.3	0.788697	3.86679e-23	2.6566e-22
ARHGAP9	0.434726	2.74516e-06	7.23403e-06			CTC-360G5.9	-1.10993	1.52557e-16	6.98451e-16
ARHGDIA	0.71984	1.35131e-18	1.00214e-17			CTC-360J11.4	-0.617216	3.03488e-05	5.9385e-05
ARHGEF10	-0.626528	5.53371e-19	4.21797e-18			CTC-366B18.4	-0.557517	3.97126e-11	1.26953e-10
ARHGEF18	0.219268	7.01366e-07	1.97244e-06			CTC-367J11.1	-1.01615	3.42463e-10	1.02409e-09
ARHGEF25	-0.712827	5.29737e-15	3.01466e-14			CTC-425O23.2	-0.658352	3.99621e-05	7.71186e-05
ARHGEF26-AS1	0.476654	1.88826e-15	1.11299e-14			CTC-428G20.1	0.225813	0.0328742	0.0445304
ARHGEF28	-0.848104	1.86839e-34	4.4051e-33			CTC-428H11.2	-0.66855	1.83108e-10	5.58019e-10
ARHGEF3	-0.498731	1.79698e-11	7.69864e-11			CTC-429L19.3	0.527033	8.96201e-05	0.00016705
ARHGEF34P	-0.270058	3.81867e-05	8.82014e-05			CTC-429P9.1	-1.10169	3.54382e-23	2.44262e-22
ARHGEF37	-1.30173	5.76001e-26	7.3953e-25			CTC-429P9.2	-1.21101	2.42329e-21	1.49581e-20
ARHGEF38	-0.960698	9.82621e-20	7.95746e-19			CTC-429P9.3	-0.822284	1.40946e-20	8.33115e-20
ARHGEF38-IT1	-0.131141	0.00382009	0.00670756			CTC-429P9.5	-1.25772	1.53422e-20	9.04342e-20
ARHGEF39	0.909301	3.78741e-54	3.63293e-52			CTC-441N14.1	0.713016	2.47307e-07	5.8696e-07
ARHGEF40	-1.22297	1.56772e-41	6.12471e-40			CTC-441N14.2	0.54085	1.81372e-05	3.6327e-05
ARHGEF7-AS1	-0.0705656	7.76573e-05	0.000172377			CTC-444N24.11	0.412368	8.93865e-09	2.39295e-08
ARHGEF7-AS2	-0.171448	2.93735e-20	2.4721e-19			CTC-444N24.6	-0.36079	0.000931037	0.0015504
ARHGEF9-IT1	0.0564458	0.0196733	0.0305835			CTC-444N24.8	0.290441	0.000222796	0.000397847
ARID3A	0.162294	0.00159973	0.00297106			CTC-448F2.4	-0.673995	9.04907e-06	1.86579e-05
ARID3B	0.144897	0.00177082	0.00326701			CTC-448F2.6	-0.369014	0.00013582	0.000248533
ARID5A	-0.799213	2.14241e-08	7.01625e-08			CTC-450M9.1	0.662903	1.80006e-06	3.96252e-06
ARIH1	-0.227986	2.89488e-06	7.60602e-06			CTC-453G23.5	0.283954	0.0314281	0.0426784
ARIH2	-0.270526	2.75998e-09	9.78611e-09			CTC-455F18.3	0.329356	0.0261364	0.0359184
ARIH2OS	-0.170202	8.33686e-06	2.0805e-05			CTC-459F4.1	-0.377081	0.0113095	0.016373
ARL10	-0.209208	0.0008805	0.00169928			CTC-459F4.3	0.175868	0.0197085	0.0275945
ARL13A	-0.0587897	0.00777516	0.0129823			CTC-459I6.1	-1.19634	6.6942e-17	3.1313e-16
ARL13B	-0.317654	2.71912e-06	7.17059e-06			CTC-459M5.2	-0.455669	0.00381164	0.00589485
ARL14	0.179816	4.73759e-05	0.000108113			CTC-461F20.1	0.495816	0.0062907	0.00943845
ARL14EP	-0.298546	1.06587e-07	3.26042e-07			CTC-471F3.4	0.545155	9.19168e-13	3.2923e-12
ARL16	0.425113	5.74851e-10	2.16014e-09			CTC-471F3.5	0.485204	0.000159656	0.000289651
ARL17A	-0.0715485	5.68665e-07	1.61482e-06			CTC-471J1.10	0.425875	0.00101065	0.00167539
ARL17B	-0.0939469	8.08517e-06	2.02018e-05			CTC-471J1.2	0.28183	0.00246998	0.00391312
ARL2BP	-0.390514	5.48907e-11	2.25261e-10			CTC-479C5.10	-0.391355	0.000308742	0.000543133
ARL3	-0.133942	0.0295291	0.0444951			CTC-484M2.1	-0.576991	1.13507e-06	2.54411e-06
ARL4A	-1.36979	9.21766e-28	1.34501e-26			CTC-487M23.5	-0.207061	0.0194767	0.0272976
ARL4D	-0.796117	4.69432e-14	2.48163e-13			CTC-487M23.7	-0.307549	0.0044762	0.00685615
ARL5AP3	-0.117163	2.74893e-16	1.72637e-15			CTC-490E21.10	-0.427535	0.00128963	0.00211074
ARL5B	0.514277	3.23941e-10	1.24396e-09			CTC-490E21.13	2.28366	8.97317e-13	3.21696e-12
ARL5C	-0.0124056	0.00027157	0.000561502			CTC-492K19.4	0.464353	0.00154142	0.00249884
ARL6IP1	0.752234	5.34361e-22	5.10148e-21			CTC-497E21.3	-1.75661	1.21085e-13	4.62455e-13
ARL6IP4	0.139515	0.00210403	0.00383958			CTC-498J12.1	-1.02119	6.69507e-10	1.954e-09
ARL6IP6	0.373371	1.6604e-07	4.97752e-07			CTC-498J12.3	-0.33534	0.000910502	0.00151803
ARL8A	0.521979	6.28204e-17	4.12726e-16			CTC-499B15.6	0.393632	0.00531118	0.00805284
ARL9	1.50451	1.59676e-30	2.83912e-29			CTC-510F12.2	-1.12149	1.04566e-21	6.59461e-21
ARMC1	0.548626	1.91984e-16	1.22104e-15			CTC-510F12.4	0.898735	2.16457e-12	7.55984e-12
ARMC10	0.41669	7.50104e-13	3.58716e-12			CTC-512J14.7	0.320539	0.00421834	0.00648314
ARMC10P1	0.0398213	0.000359965	0.000732102			CTC-518P12.6	0.468553	0.000104631	0.000193579
ARMC2-AS1	-0.41849	1.70466e-20	1.45993e-19			CTC-523E23.4	-0.852687	2.43466e-06	5.29112e-06
ARMC3	0.136864	6.36572e-07	1.79841e-06			CTC-523E23.8	-0.429867	0.00213019	0.00339624
ARMC4P1	0.0526641	0.0059394	0.0100999			CTC-534A2.2	0.346831	2.94598e-08	7.55185e-08
ARMCX3	-0.478703	1.33891e-11	5.79542e-11			CTC-537E7.3	-1.35411	2.68011e-17	1.2839e-16
ARMS2	-0.0642637	6.97184e-06	1.75463e-05			CTC-548K16.1	1.42772	1.27698e-10	3.92669e-10
ARNT2	0.644259	1.47897e-06	4.01283e-06			CTC-548K16.2	-0.408183	0.00215117	0.0034289
ARNTL2	0.977174	7.94062e-20	6.48087e-19			CTC-548K16.6	0.563125	3.56361e-06	7.62924e-06
ARPC1B	1.37972	3.08399e-27	4.31521e-26			CTC-550B14.7	-0.339289	0.00222856	0.00354713
ARPC3	0.619739	1.30139e-22	1.3111e-21			CTC-558O2.2	-0.976897	6.75853e-11	2.12295e-10
ARPC3P1	0.156906	1.06903e-06	2.94707e-06			CTC-559E9.10	0.447121	0.00103128	0.00170765
ARPC3P2	0.0375825	0.028118	0.0425341			CTC-559E9.4	-1.02833	8.92644e-15	3.66977e-14
ARPC3P5	0.0346698	0.00010996	0.000239516			CTC-559E9.5	-0.615398	2.6351e-13	9.83814e-13
ARPC4	0.734236	2.59155e-27	3.64155e-26			CTC-559E9.6	-0.4022	1.04259e-08	2.77547e-08
ARPC4-TTLL3	-0.0447153	0.000225263	0.000470563			CTC-559E9.8	0.227628	0.00934371	0.0136851
ARPC5	0.868131	6.07308e-34	1.3818e-32			CTC-559E9.9	-0.883586	7.79623e-10	2.2627e-09
ARPC5L	1.0088	1.2154e-38	3.84561e-37			CTC-563A5.2	0.311165	0.0248061	0.0342163
ARPP19	-0.551435	4.90057e-20	4.05783e-19			CTC-756D1.2	-0.445847	0.000578388	0.000986549
ARRB1	-1.57506	1.52593e-60	2.35679e-58			CTC-756D1.3	-0.382572	0.00140097	0.00228241
ARRB2	0.430555	2.4485e-09	8.72754e-09			CTC-786C10.1	-1.57391	1.99295e-28	1.82607e-27
ARRDC1	0.499735	1.07899e-07	3.29915e-07			CTD-2001C12.1	0.398066	0.00405233	0.00624155
ARRDC3	-1.26398	2.60887e-25	3.18677e-24			CTD-2002H8.2	-0.508889	8.19235e-06	1.69472e-05
ARRDC5	0.0979934	4.13947e-05	9.51407e-05			CTD-2002J20.1	-0.27705	0.0162701	0.0230563
ARSB	0.457449	6.6482e-15	3.75934e-14			CTD-2003C8.2	0.304648	0.035329	0.0476521
ARSEP1	0.0538491	0.00790491	0.0131779			CTD-2005H7.1	-0.757176	0.000103761	0.000192059
ARSG	-0.722727	2.20334e-28	3.33382e-27			CTD-2005H7.2	-1.035	1.05372e-08	2.80269e-08
ARSI	0.728872	8.51101e-18	5.97738e-17			CTD-2006C1.2	-0.315202	0.000150245	0.000273442
ART3	1.94547	1.54677e-19	1.23315e-18			CTD-2006C1.6	0.931136	1.2252e-13	4.6787e-13
ART4	-0.367191	4.14895e-10	1.57744e-09			CTD-2006H14.2	0.245061	0.00337158	0.00525077
ARTN	1.01902	1.74287e-22	1.7362e-21			CTD-2006K23.1	-0.589128	0.000151218	0.00027514
ARV1	0.428118	2.94707e-09	1.04282e-08			CTD-2007H13.3	-0.27238	0.0190196	0.0266949
ASAH1	-1.13892	1.08292e-27	1.57073e-26			CTD-2007L18.5	-0.479877	0.00015802	0.000286891
ASB14	-0.207945	2.83079e-09	1.00294e-08			CTD-2008A1.2	1.19701	2.32309e-12	8.09707e-12
ASB16-AS1	0.136535	0.0145911	0.0232119			CTD-2008P7.10	0.697584	1.82894e-05	3.66081e-05
ASB3	-0.0233598	1.21916e-07	3.70473e-07			CTD-2010I16.1	-0.672542	2.72441e-12	9.44932e-12
ASB4	-0.105573	0.00157484	0.00292767			CTD-2011F17.2	-0.802313	1.86168e-08	4.85576e-08
ASB6	0.244654	1.30095e-05	3.1772e-05			CTD-2012J19.3	0.363967	0.00240088	0.00380889
ASB8	-0.586008	1.49179e-28	2.2847e-27			CTD-2012K14.2	0.384158	0.0125468	0.0180423
ASCC1	0.287754	3.14975e-10	1.21042e-09			CTD-2013N17.1	0.306848	0.0103469	0.015072
ASCL2	0.833645	2.99779e-12	1.36502e-11			CTD-2013N24.2	-1.18315	4.68151e-40	7.50293e-39
ASCL3	-0.0140178	0.0173963	0.0272858			CTD-2015G9.2	-4.57786	3.1724e-44	6.39533e-43
ASCL5	0.0700234	6.26368e-13	3.0148e-12			CTD-2015H6.3	1.25146	2.69136e-49	7.15571e-48
ASGR1	0.160348	4.1231e-07	1.1903e-06			CTD-2017C7.1	-0.342073	0.00991632	0.0144784
ASGR2	0.0843167	0.00148342	0.00276931			CTD-2017C7.2	-0.353371	0.00175447	0.00282431
ASH1L-AS1	0.3071	6.66002e-09	2.28392e-08			CTD-2017D11.1	0.254486	0.02312	0.0320314
ASH1L-IT1	0.0576678	0.0131054	0.0210122			CTD-2020K17.3	-0.393352	0.0076278	0.0113099
ASIC4	0.037799	2.28239e-05	5.40983e-05			CTD-2020K17.4	0.381052	0.0121215	0.0174716
ASLP1	-0.103385	0.00613879	0.0104137			CTD-2022H16.3	0.571996	1.31111e-06	2.92113e-06
ASMT	-0.0318733	0.00307538	0.00547379			CTD-2023M8.1	0.541761	0.000266731	0.000472086
ASNA1	0.504315	3.14051e-15	1.8173e-14			CTD-2024P10.2	0.536144	5.43317e-06	1.14549e-05
ASNSP1	0.245187	8.53464e-05	0.000188367			CTD-2031P19.3	-0.393417	0.00192132	0.00308014
ASPA	-1.40726	5.0369e-50	3.55804e-48			CTD-2033A16.2	0.23796	0.0182081	0.0256407
ASPDH	-0.0987537	5.26297e-08	1.66149e-07			CTD-2033A16.3	-0.580264	0.000291575	0.000514375
ASPHD1	0.781042	1.18235e-11	5.13668e-11			CTD-2035E11.3	-0.34879	0.0114049	0.0165043
ASPRV1	-0.286112	1.62919e-07	4.88998e-07			CTD-2035E11.4	-0.401787	0.00248793	0.00394019
ASRGL1	0.334247	5.90601e-05	0.000133058			CTD-2035E11.5	0.460678	0.000400096	0.000694893
ASS1P12	0.166326	2.51722e-05	5.9406e-05			CTD-2044J15.1	-0.766366	4.22795e-08	1.07e-07
ASUN	1.01145	4.16933e-31	7.74183e-30			CTD-2046J7.1	1.15785	1.4654e-13	5.5636e-13
ATAD1	-0.52908	1.97467e-10	7.7336e-10			CTD-2047H16.2	1.79451	2.56348e-25	1.98783e-24
ATAT1	0.56251	4.8745e-12	2.1798e-11			CTD-2047H16.4	-0.317117	0.0102658	0.0149577
ATE1	-0.632999	8.82339e-18	6.18962e-17			CTD-2049O4.1	-0.936022	4.83575e-11	1.53593e-10
ATF2	-0.260758	1.19039e-05	2.91853e-05			CTD-2054N24.2	-1.65436	1.07658e-27	9.4442e-27
ATF3	-1.82216	8.81943e-26	1.11312e-24			CTD-2058B24.2	-0.57575	0.000281626	0.00049746
ATF4	0.27142	2.89604e-06	7.60842e-06			CTD-2062F14.3	-0.87116	7.36041e-09	1.98333e-08
ATF4P3	0.0702126	0.000236158	0.000491883			CTD-2063L20.1	-0.418218	0.00162573	0.00262872
ATF5	0.938941	4.30694e-25	5.19312e-24			CTD-2073O6.1	-0.258175	0.029702	0.0404957
ATF6B	0.583748	2.63875e-15	1.53892e-14			CTD-2078B5.2	-2.00672	3.13218e-39	4.86996e-38
ATF7IP2	0.248806	0.000193252	0.00040731			CTD-2081C10.7	-1.12279	2.73329e-20	1.5864e-19
ATG10	-0.167651	9.47445e-07	2.63039e-06			CTD-2083E4.4	0.498217	1.31504e-06	2.92895e-06
ATG12	-0.375484	2.07262e-17	1.41553e-16			CTD-2083E4.6	-1.25685	7.59444e-21	4.5603e-20
ATG14	-0.726424	6.19915e-33	1.31831e-31			CTD-2083E4.7	0.969026	2.66376e-05	5.24654e-05
ATG16L2	-0.141357	0.0330034	0.0492557			CTD-2086L14.1	-0.807732	2.84579e-11	9.18971e-11
ATG2B	-0.822951	1.75152e-34	4.13759e-33			CTD-2102P23.1	0.339301	0.00389433	0.00601162
ATG3	0.37066	8.33868e-17	5.43438e-16			CTD-2104P17.1	-2.06415	7.50422e-43	1.41463e-41
ATG4B	0.299164	1.04749e-07	3.20796e-07			CTD-2105E13.15	1.1419	1.66447e-16	7.60155e-16
ATG5	0.256158	1.02723e-06	2.83806e-06			CTD-2116N17.1	0.679571	3.88434e-08	9.85928e-08
ATG9B	0.454631	8.36937e-23	8.51182e-22			CTD-2116N20.1	1.48827	1.33342e-21	8.3617e-21
ATIC	0.702038	6.14335e-25	7.31782e-24			CTD-2124B8.2	0.562122	1.20562e-10	3.71555e-10
ATL2	0.295382	0.00380447	0.00668142			CTD-2126E3.1	-0.494842	0.00163607	0.00264388
ATL3	-0.230781	0.000357965	0.000728441			CTD-2126E3.3	-0.383265	0.00429681	0.0065975
ATOH7	0.130305	2.73264e-11	1.15163e-10			CTD-2127H9.1	-0.431025	0.00261047	0.00412409
ATOX1	0.369035	3.93603e-07	1.139e-06			CTD-2132N18.2	-0.68292	1.82702e-07	4.38567e-07
ATP12A	0.0609184	0.00885739	0.0146558			CTD-2132N18.4	-0.261073	0.0266166	0.0365365
ATP13A2	0.582076	4.11833e-13	2.01548e-12			CTD-2134A5.3	0.547645	0.00147313	0.00239417
ATP13A4-AS1	-0.0427445	0.00534077	0.00915884			CTD-2134A5.4	0.860733	2.32774e-07	5.53993e-07
ATP13A5-AS1	0.155422	7.27565e-08	2.26413e-07			CTD-2135D7.2	0.572786	1.62043e-06	3.58366e-06
ATP1A1OS	-0.400229	4.86177e-14	2.56642e-13			CTD-2135D7.5	-2.93984	4.40958e-74	4.94698e-72
ATP1B2	-0.919542	8.40864e-31	1.52485e-29			CTD-2135J3.3	-1.68309	1.82488e-42	3.38007e-41
ATP1B3-AS1	-0.262894	9.91072e-06	2.45145e-05			CTD-2154I11.2	-1.29393	7.55377e-21	4.53686e-20
ATP1B3P1	0.0205333	0.00174666	0.00322457			CTD-2161E19.1	-0.495802	4.61088e-06	9.78552e-06
ATP2A2	0.17501	0.0124849	0.0200978			CTD-2162K18.4	0.447344	0.0172128	0.0243185
ATP2A3	0.33656	0.0148089	0.0235305			CTD-2165H16.4	0.907412	1.36744e-12	4.84449e-12
ATP4B	0.064418	7.28118e-05	0.000162155			CTD-2171N6.1	2.67449	1.10367e-30	1.13021e-29
ATP5A1	-0.132516	0.018859	0.0294004			CTD-2173L22.4	-0.719029	1.04533e-08	2.78154e-08
ATP5A1P2	0.0306132	0.0108645	0.0176743			CTD-2179L22.1	0.263234	0.0329476	0.044623
ATP5C1	0.84203	9.72814e-26	1.22273e-24			CTD-2184C24.2	-0.567036	4.57042e-05	8.77517e-05
ATP5C1P1	0.0560763	5.24975e-08	1.65746e-07			CTD-2184D3.5	-0.723648	1.04526e-07	2.55857e-07
ATP5D	0.342516	0.00371462	0.00653342			CTD-2184D3.7	-0.92398	4.16131e-10	1.23634e-09
ATP5E	0.447792	4.43272e-11	1.83543e-10			CTD-2186M15.3	-0.395	8.69609e-07	1.96749e-06
ATP5EP2	0.303494	1.3584e-07	4.10835e-07			CTD-2192J16.11	-0.319689	0.00919608	0.013481
ATP5F1P3	0.0680113	0.000655541	0.00128825			CTD-2192J16.15	-0.333386	5.61081e-05	0.000106754
ATP5F1P5	-1.13656	1.49364e-60	2.32663e-58			CTD-2192J16.20	0.459953	7.92645e-09	2.13024e-08
ATP5G1	0.705254	2.52513e-18	1.84193e-17			CTD-2192J16.21	0.643201	1.46043e-05	2.9521e-05
ATP5G1P1	0.086502	5.51277e-06	1.40136e-05			CTD-2192J16.22	-1.11425	1.38499e-17	6.7735e-17
ATP5G1P4	0.643487	9.62953e-30	1.62048e-28			CTD-2192J16.26	0.347992	0.0114662	0.0165843
ATP5G3	0.438603	5.17095e-10	1.95034e-09			CTD-2194D22.3	-0.60543	0.00930622	0.0136367
ATP5H	0.378713	3.7988e-09	1.33166e-08			CTD-2195M15.1	-1.13021	4.17743e-09	1.14852e-08
ATP5I	0.35992	9.08136e-06	2.25903e-05			CTD-2196E14.3	0.76392	1.23144e-09	3.52399e-09
ATP5J	0.272517	3.86833e-05	8.93031e-05			CTD-2199O4.6	0.46181	0.000594402	0.00101217
ATP5J2	1.0447	1.82668e-36	4.9467e-35			CTD-2201E18.3	-0.488446	2.02012e-10	6.14001e-10
ATP5J2-PTCD1	0.0185486	0.00747911	0.0125299			CTD-2201E18.5	0.615201	1.56305e-05	3.15146e-05
ATP5S	-0.50226	3.03566e-29	4.91776e-28			CTD-2201G3.1	-0.570568	0.000453423	0.000782441
ATP6AP1L	-0.288985	7.04341e-12	3.10701e-11			CTD-2206G10.2	-0.463819	6.89211e-05	0.0001298
ATP6C	0.00839866	0.0302344	0.0454469			CTD-2206N4.4	0.365667	0.00488153	0.00743532
ATP6V0A2	0.156243	0.000659665	0.00129566			CTD-2210P15.2	-0.329136	0.0102176	0.0148927
ATP6V0C	0.567986	9.77058e-15	5.45721e-14			CTD-2210P24.4	-1.73307	3.2398e-24	2.35916e-23
ATP6V0CP2	-0.0901758	5.06463e-07	1.44812e-06			CTD-2224J9.8	-1.86675	2.59332e-38	3.83962e-37
ATP6V0D2	0.243714	0.000392128	0.000793662			CTD-2227E11.1	0.916689	5.24268e-07	1.20956e-06
ATP6V0E2	0.354094	0.00261123	0.00469882			CTD-2228K2.5	0.419589	2.2126e-10	6.70804e-10
ATP6V0E2-AS1	-0.132659	0.0132701	0.0212557			CTD-2231E14.8	0.314847	0.0337532	0.0456381
ATP6V1B2	0.194634	0.000490135	0.00098054			CTD-2235C13.1	-0.707035	6.43505e-08	1.60559e-07
ATP6V1C2	0.980418	2.51433e-18	1.83442e-17			CTD-2245E15.3	0.573358	0.00112342	0.00185144
ATP6V1E2	0.176455	0.00123452	0.00233321			CTD-2245F17.3	-0.303518	0.0143754	0.0204998
ATP6V1F	0.912329	7.67496e-32	1.51627e-30			CTD-2246P4.1	0.415921	0.00158358	0.00256492
ATP6V1G1	0.286388	0.000178195	0.000377124			CTD-2248H3.1	-0.474145	0.000125974	0.00023119
ATP6V1G1P2	0.0581627	0.00247997	0.00447877			CTD-2256P15.1	0.833342	9.69291e-12	3.23582e-11
ATP6V1G2	-0.155874	0.000385871	0.000781649			CTD-2256P15.2	0.779834	1.66532e-14	6.72218e-14
ATP7B	-0.52441	2.1644e-13	1.08205e-12			CTD-2258A20.5	-0.715208	1.21142e-08	3.20667e-08
ATP8A1	-0.5897	1.76903e-13	8.91485e-13			CTD-2260A17.1	-0.708704	1.13503e-08	3.01081e-08
ATP8A2P1	-3.33285	1.9033e-42	7.85678e-41			CTD-2260A17.2	-0.192008	0.0201524	0.028166
ATP8B4	-0.388049	1.62847e-09	5.89276e-09			CTD-2263F21.1	-1.96964	2.11065e-35	2.71687e-34
ATP8B5P	0.0824473	0.0031293	0.00556242			CTD-2265M8.2	1.52593	3.11479e-19	1.70053e-18
ATP9B	-0.359487	3.92458e-15	2.25526e-14			CTD-2269F5.1	-0.533991	0.00105402	0.0017433
ATPAF1	-0.312252	2.74729e-08	8.9123e-08			CTD-2270L9.4	0.944081	1.52999e-24	1.12961e-23
ATPIF1	0.65229	1.1374e-16	7.34554e-16			CTD-2270N23.1	-0.399682	4.94572e-05	9.46086e-05
ATXN7L2	0.51482	7.86651e-17	5.13768e-16			CTD-2278I10.4	-0.374063	0.0013697	0.00223383
AUH	-0.831641	5.19746e-41	1.95307e-39			CTD-2281M20.1	0.583096	0.000439369	0.000759375
AUP1	0.713462	2.61014e-29	4.2587e-28			CTD-2283N19.1	-0.286262	0.0149728	0.0213033
AURKA	2.76125	7.51589e-88	2.73954e-84			CTD-2284J15.1	1.31588	2.40045e-20	1.39733e-19
AURKAIP1	0.859701	6.21637e-13	2.99243e-12			CTD-2287O16.1	-0.467045	0.000656288	0.00111186
AURKAPS1	0.065307	0.000560043	0.00111124			CTD-2288F12.1	0.413898	0.000464364	0.00080037
AURKC	-0.104214	0.00890228	0.0147227			CTD-2290C23.1	-0.399804	0.000747729	0.00125897
AVEN	0.297516	9.43248e-08	2.89942e-07			CTD-2290P7.1	-0.880708	5.00717e-11	1.58837e-10
AVL9	0.166301	0.0111372	0.0180816			CTD-2292M16.8	-0.831867	1.15832e-17	5.6922e-17
AVP	-0.0214129	0.00799253	0.013313			CTD-2293H3.1	-0.319108	0.0127024	0.0182565
AVPI1	-0.942289	5.79825e-17	3.82458e-16			CTD-2293H3.2	0.320748	0.010328	0.015046
AVPR1A	-1.03562	1.44331e-27	2.07039e-26			CTD-2297D10.2	-0.775128	7.4771e-07	1.70062e-06
AVPR2	-1.55224	2.39005e-60	3.58507e-58			CTD-2298J14.2	-1.85144	3.59336e-33	4.15283e-32
AXIN2	-0.917365	3.26763e-33	7.05599e-32			CTD-2302E22.4	0.367449	0.00211949	0.00338016
AZGP1P1	-0.608553	5.62266e-09	1.94004e-08			CTD-2303H24.2	-0.771938	0.00914654	0.0134148
AZGP1P2	-0.313095	1.46973e-15	8.71368e-15			CTD-2308L22.1	-1.00154	1.48401e-10	4.54255e-10
AZI1	1.03224	2.14118e-19	1.68931e-18			CTD-2311M21.2	-1.49353	2.03896e-28	1.86638e-27
AZU1	-0.143049	0.0029058	0.00519275			CTD-2311M21.3	-1.7858	3.2147e-30	3.19594e-29
B3GALNT1	0.483493	3.61774e-09	1.27002e-08			CTD-2313F11.1	0.543451	0.000864601	0.001445
B3GALNT2	0.510049	1.62483e-11	6.98574e-11			CTD-2314G24.2	-0.740978	5.85374e-05	0.000111139
B3GALT2	-0.0985442	0.000941679	0.00181016			CTD-2315E11.1	0.610773	0.000771497	0.00129646
B3GALT6	0.468754	2.28907e-09	8.17766e-09			CTD-2319I12.1	1.06647	2.46667e-08	6.36872e-08
B3GNT1	-0.745528	3.89587e-26	5.07703e-25			CTD-2319I12.2	0.54833	3.32793e-07	7.81786e-07
B3GNT4	0.293083	5.92766e-24	6.58528e-23			CTD-2324F15.2	-0.979835	4.20986e-08	1.06571e-07
B3GNT7	1.05845	1.47613e-14	8.13993e-14			CTD-2325A15.3	-0.948104	1.32164e-12	4.68584e-12
B3GNT8	-0.375301	5.44458e-07	1.54995e-06			CTD-2325P2.3	-1.55241	1.41313e-31	1.51809e-30
B3GNT9	0.155948	0.0310896	0.0466228			CTD-2328D6.1	-0.552397	0.00281117	0.00442318
B3GNTL1	0.317491	7.3867e-10	2.75021e-09			CTD-2330K9.3	0.474953	0.00051067	0.000876731
B4GALT2	1.00472	2.86859e-32	5.81213e-31			CTD-2331H12.5	0.319014	0.00359537	0.00557757
B4GALT3	1.23885	1.38567e-43	6.15945e-42			CTD-2331H12.7	0.839125	6.87451e-09	1.85766e-08
B4GALT5	0.171228	0.00913159	0.0150684			CTD-2336O2.1	-0.312337	0.000838439	0.00140289
B4GALT6	-0.41925	9.05376e-13	4.2998e-12			CTD-2337A12.1	-1.7931	1.77957e-35	2.29663e-34
B4GALT7	0.284621	2.10329e-05	5.00947e-05			CTD-2341M24.1	-1.10649	3.30912e-16	1.48303e-15
BAALC	-0.738077	7.56086e-15	4.25758e-14			CTD-2342J14.6	0.567027	1.40831e-09	4.01264e-09
BAAT	0.0137824	0.0213581	0.0330014			CTD-2342N23.3	-0.77427	3.45173e-07	8.09697e-07
BACE1	-0.548219	1.3568e-15	8.07037e-15			CTD-2349P21.5	0.561661	0.000121387	0.000223068
BACH1-AS1	-0.132335	0.000471729	0.000945793			CTD-2349P21.6	0.515218	0.000417188	0.000722941
BACH1-IT1	0.0875779	0.00547683	0.00937277			CTD-2350C19.2	-0.600314	6.83477e-06	1.42445e-05
BAD	0.280023	0.00354909	0.00625735			CTD-2357A8.3	0.898798	1.26517e-09	3.61675e-09
BAG1	-0.155418	0.0143291	0.0228327			CTD-2366F13.1	-0.486967	2.79699e-09	7.79474e-09
BAG2	0.639746	1.00304e-12	4.7463e-12			CTD-2366F13.2	-1.32489	4.76878e-25	3.63159e-24
BAG5	-0.35671	4.84623e-09	1.68169e-08			CTD-2369P2.10	0.33615	0.00717558	0.0106819
BAIAP2	0.305055	0.00063428	0.00124916			CTD-2370N5.3	0.407667	0.00280737	0.00441771
BAIAP2L2	0.867754	1.21644e-17	8.43594e-17			CTD-2373J6.1	-0.634906	1.16279e-06	2.60402e-06
BAK1	1.34454	2.33044e-51	1.85064e-49			CTD-2377D24.6	1.89222	3.19579e-22	2.07719e-21
BAK1P2	-0.0667198	3.07244e-08	9.91592e-08			CTD-2380F24.1	-0.533934	9.69529e-05	0.000180049
BAMBI	1.08105	1.94281e-10	7.61374e-10			CTD-2382E5.4	-1.34996	8.50281e-23	5.71367e-22
BANF1	1.00902	1.78651e-36	4.84872e-35			CTD-2383M3.1	-0.666977	3.535e-05	6.86165e-05
BANF1P3	0.364663	4.13999e-09	1.44515e-08			CTD-2410N18.3	1.11831	2.869e-27	2.45667e-26
BANK1	-0.327044	0.00185391	0.00341013			CTD-2510F5.4	1.69879	3.54536e-24	2.57622e-23
BANP	0.432866	1.99774e-18	1.46899e-17			CTD-2514C3.1	-0.707649	8.04851e-07	1.82517e-06
BARD1	0.861641	1.37377e-23	1.48236e-22			CTD-2514K5.2	-0.820014	2.09748e-12	7.33481e-12
BARHL2	0.119337	0.00323273	0.00573256			CTD-2515A14.1	-0.335488	0.0165244	0.0233963
BARX1	0.982471	7.26212e-10	2.70548e-09			CTD-2516F10.2	-0.938877	7.08656e-14	2.74954e-13
BASP1	0.922064	1.39958e-12	6.54704e-12			CTD-2516F10.4	0.900512	1.56757e-08	4.10882e-08
BATF3	0.275885	1.23726e-07	3.75723e-07			CTD-2517M22.14	0.503096	0.00179303	0.00288386
BBC3	0.440082	2.8139e-07	8.25352e-07			CTD-2517M22.17	1.28276	3.94974e-18	2.00894e-17
BBIP1	-0.545482	2.00339e-34	4.70815e-33			CTD-2517O10.6	0.620906	8.98517e-10	2.59467e-09
BBS1	-0.150566	8.74268e-10	3.23392e-09			CTD-2521M24.5	0.723453	8.03746e-05	0.000150579
BBS10	-0.843692	1.48957e-28	2.28225e-27			CTD-2521M24.6	0.564118	5.61736e-08	1.40819e-07
BBS12	-0.567665	2.72698e-21	2.47876e-20			CTD-2521M24.9	0.701896	1.36064e-08	3.58242e-08
BBS4	-0.644737	6.31813e-26	8.0664e-25			CTD-2523D13.2	1.33293	6.82583e-26	5.4382e-25
BBS5	-0.394241	5.20052e-18	3.70884e-17			CTD-2525I3.2	-0.417432	0.000456317	0.000787188
BCAM	-1.21185	1.40939e-15	8.36546e-15			CTD-2527I21.14	0.358493	0.00302182	0.00473762
BCAP29	-0.322378	3.22478e-07	9.39896e-07			CTD-2527I21.7	0.509025	4.27085e-05	8.21946e-05
BCAR4	0.142743	0.0268114	0.0407401			CTD-2528L19.3	1.01832	1.69001e-14	6.81986e-14
BCAS2P2	0.0740211	0.00449196	0.00779639			CTD-2528L19.6	-0.272735	0.000718521	0.00121157
BCAS3	-0.423319	1.32014e-18	9.79421e-18			CTD-2529O21.1	1.62522	2.47608e-23	1.72389e-22
BCAS4	0.218155	0.00272592	0.00488904			CTD-2530H12.4	-0.717664	8.56831e-10	2.47844e-09
BCDIN3D	-0.122345	0.00301093	0.0053672			CTD-2530H12.8	-0.525865	8.70068e-06	1.79664e-05
BCDIN3D-AS1	-0.160171	1.54198e-24	1.7877e-23			CTD-2530N21.4	-1.00278	1.03569e-18	5.46836e-18
BCHE	-0.877832	6.81207e-19	5.15787e-18			CTD-2532N20.1	-0.425841	0.00145587	0.00236695
BCKDHB	-0.662939	5.17583e-17	3.42767e-16			CTD-2536I1.1	-2.07581	1.1458e-47	2.79839e-46
BCKDK	0.225455	1.44066e-05	3.50103e-05			CTD-2538C1.3	0.460235	0.000109385	0.000201941
BCL2	-1.97579	2.59276e-52	2.19272e-50			CTD-2538G9.5	-0.700676	5.92883e-06	1.24431e-05
BCL2L10	0.257561	7.31873e-05	0.000162951			CTD-2540B15.9	-1.17908	1.85359e-17	8.98726e-17
BCL2L12	1.4291	1.55785e-48	9.89263e-47			CTD-2540F13.2	0.329187	0.0346734	0.0468135
BCL2L13	-0.33668	3.71856e-12	1.68082e-11			CTD-2541J13.1	-1.91068	1.56256e-30	1.58077e-29
BCL2L14	0.599234	2.93632e-09	1.03912e-08			CTD-2541M15.1	-0.527807	9.73046e-08	2.38831e-07
BCL2L2	-1.01916	2.65372e-38	8.19037e-37			CTD-2541M15.3	-0.881912	6.96937e-09	1.882e-08
BCL2L2-PABPN1	0.0630574	0.00208758	0.00381071			CTD-2542C24.3	0.430952	0.00312468	0.0048886
BCL3	0.76685	3.33574e-12	1.51454e-11			CTD-2545H1.2	0.486988	0.00316869	0.0049524
BCL6B	-0.81093	5.28558e-18	3.76582e-17			CTD-2547E10.2	-0.24186	0.0332574	0.0450053
BCL7B	0.124989	0.0136612	0.0218312			CTD-2547L16.1	-0.935571	5.00316e-15	2.0924e-14
BCL7C	0.534588	4.04534e-12	1.8231e-11			CTD-2547L24.3	0.428416	0.000339741	0.000594897
BCO2	-0.161025	2.94243e-15	1.70756e-14			CTD-2547L24.4	1.77766	1.57246e-27	1.36725e-26
BCRP1	0.0578894	0.0264758	0.0402739			CTD-2550O8.7	-0.735563	1.44218e-09	4.10407e-09
BCRP3	0.144835	2.12552e-05	5.05712e-05			CTD-2553C6.1	-0.781923	1.26142e-08	3.33199e-08
BCS1L	0.361585	4.75517e-12	2.12853e-11			CTD-2554C21.1	-0.462138	2.32859e-05	4.61338e-05
BCYRN1	-0.0904717	0.00311149	0.00553347			CTD-2554C21.2	-1.35468	9.03958e-13	3.23993e-12
BDH1	0.366521	8.78199e-05	0.000193533			CTD-2554C21.3	-1.10871	1.5203e-06	3.37088e-06
BDH2	-0.855665	3.87079e-29	6.21269e-28			CTD-2555A7.2	1.22543	8.26497e-10	2.39346e-09
BDH2P1	-0.0417916	0.00158705	0.00294902			CTD-2555O16.1	-0.455992	0.000127884	0.000234508
BDKRB2	-0.808817	2.63014e-19	2.05771e-18			CTD-2555O16.2	-0.809358	1.41935e-18	7.43427e-18
BDNF	-0.0763702	0.0027182	0.00487591			CTD-2555O16.4	-0.778988	1.39535e-24	1.03296e-23
BDNF-AS	-0.458445	4.999e-23	5.17652e-22			CTD-2561B21.10	-0.482408	0.00111131	0.00183235
BECN1	-0.484995	2.4099e-16	1.51895e-15			CTD-2561B21.11	-0.324529	0.0175721	0.0247969
BECN1P1	0.0689431	7.56119e-10	2.81316e-09			CTD-2561B21.5	1.10256	1.77994e-13	6.71903e-13
BEGAIN	-0.254389	7.1041e-08	2.2132e-07			CTD-2561J22.5	0.50961	0.00193808	0.00310503
BEND3	0.911797	3.15757e-35	7.82949e-34			CTD-2562J15.4	0.507093	4.72603e-05	9.06324e-05
BEND4	0.072872	0.0081318	0.013532			CTD-2562J17.7	-0.633834	1.2941e-05	2.62801e-05
BEND5	-0.718524	1.97532e-14	1.07898e-13			CTD-2566J3.1	-1.68575	3.43793e-07	8.06598e-07
BEST1	-0.271573	6.61141e-19	5.01219e-18			CTD-2568A17.5	0.474458	0.00112627	0.00185603
BEX1	-0.428203	0.00540237	0.00925533			CTD-2571L23.6	-0.478133	3.7217e-05	7.20429e-05
BEX4	-0.716284	7.20204e-10	2.68392e-09			CTD-2571L23.8	-0.65778	7.4797e-08	1.856e-07
BEX5	-0.620694	8.58076e-08	2.64834e-07			CTD-2574D22.2	0.659422	2.99754e-07	7.06759e-07
BFAR	0.159591	6.37493e-05	0.000143012			CTD-2574D22.4	0.662278	1.32156e-17	6.47477e-17
BFSP2-AS1	-0.0646353	0.000310751	0.000638025			CTD-2575K13.6	0.691603	8.0757e-05	0.000151254
BGLAP	0.172987	0.000119065	0.000258051			CTD-2576D5.4	0.623426	0.000254297	0.000451149
BHLHA15	0.611597	9.05171e-13	4.29939e-12			CTD-2576F9.1	-0.782427	4.36451e-09	1.19853e-08
BHLHE22	-0.18011	0.0150266	0.0238543			CTD-2583A14.10	0.699874	1.41679e-05	2.86682e-05
BHLHE40	-0.853979	1.44091e-09	5.24005e-09			CTD-2583A14.11	1.45269	4.56178e-33	5.23476e-32
BHMT2	-1.78145	1.18504e-25	1.47977e-24			CTD-2583A14.8	1.26316	1.04777e-28	9.73614e-28
BIK	0.548519	0.000544043	0.00108144			CTD-2587H19.2	-2.2455	9.76741e-42	1.74135e-40
BIN1	-0.636593	1.28865e-08	4.30891e-08			CTD-2587H24.1	0.283802	0.0238944	0.0330562
BIN2P1	0.00978151	0.0176353	0.0276262			CTD-2587H24.10	0.840075	1.57368e-07	3.79603e-07
BIN3	-0.249499	2.55267e-06	6.75559e-06			CTD-2587M2.1	-0.550287	9.60198e-05	0.000178388
BIRC5	3.59638	2.42171e-81	2.84746e-78			CTD-2588C8.8	-0.332392	0.00853662	0.0125764
BIRC7	0.134086	0.0162154	0.0255767			CTD-2589H19.6	0.600615	8.0979e-06	1.67631e-05
BLACE	0.00502039	0.0100255	0.0164252			CTD-2589M5.4	2.15708	2.5652e-20	1.49072e-19
BLCAP	-0.788438	1.03099e-33	2.30833e-32			CTD-2600O9.1	-2.46484	3.97265e-47	9.3948e-46
BLK	0.306875	3.26032e-05	7.59499e-05			CTD-2607J13.1	0.542266	0.000474408	0.000817273
BLM	1.40331	1.58147e-59	2.2171e-57			CTD-2609K8.3	-0.509016	0.000488283	0.000840441
BLMH	0.335106	3.51034e-07	1.01905e-06			CTD-2611K5.5	-1.86872	2.6552e-34	3.25247e-33
BLNK	0.208369	0.0274188	0.0415886			CTD-2616J11.10	-0.638775	1.55594e-06	3.44764e-06
BLOC1S3	0.605974	9.48693e-24	1.03719e-22			CTD-2619J13.13	0.555322	0.0234058	0.0324078
BLOC1S4	0.308951	7.55037e-07	2.11603e-06			CTD-2619J13.17	-0.983865	4.78424e-17	2.25779e-16
BLOC1S5-TXNDC5	-0.110961	0.00462644	0.00801073			CTD-2619J13.19	0.70181	1.61186e-09	4.57186e-09
BLVRA	-0.443352	9.85701e-08	3.02539e-07			CTD-2619J13.3	-0.563596	1.03787e-06	2.33098e-06
BLVRB	-0.505961	1.25313e-05	3.06472e-05			CTD-2619J13.8	0.607765	1.34061e-07	3.25344e-07
BLZF2P	-0.032841	0.000579484	0.00114738			CTD-2619J13.9	0.684018	3.35488e-11	1.07786e-10
BMP2	-0.666381	1.67077e-08	5.52678e-08			CTD-2620I22.3	0.874943	2.41526e-06	5.25102e-06
BMP3	-0.444198	1.37521e-08	4.58738e-08			CTD-2623N2.11	-0.269706	0.0356027	0.0480001
BMP5	-0.610022	9.55618e-09	3.23329e-08			CTD-2623N2.3	-0.641779	1.0975e-10	3.39408e-10
BMP6	-1.05604	3.74451e-14	1.9966e-13			CTD-2626G11.2	-0.811614	0.00137695	0.00224521
BMP7	0.414123	0.00255431	0.00460366			CTD-2630F21.1	0.406851	2.3602e-06	5.13698e-06
BMP8B	0.579725	2.07559e-10	8.11141e-10			CTD-2631K10.1	-0.39602	0.00105116	0.00173888
BMPR1A	-0.511074	3.76519e-20	3.14774e-19			CTD-2636A23.2	-0.829406	2.68303e-12	9.31283e-12
BMPR1APS2	-0.0467532	0.000658838	0.00129424			CTD-2639E6.4	-0.380745	0.00167656	0.00270488
BMS1P1	-0.302203	1.54603e-10	6.11071e-10			CTD-2639E6.9	-0.414042	0.000202493	0.000363284
BMS1P10	-0.1808	0.000554447	0.00110086			CTD-2647L4.4	-0.952076	7.15204e-13	2.58489e-12
BMS1P2	-0.0579482	0.000235816	0.000491198			CTD-2650P22.1	-0.35104	0.00705782	0.0105208
BMS1P4	-0.0766868	0.00190501	0.00349653			CTD-2651B20.2	0.591996	1.43484e-07	3.47419e-07
BMS1P9	-0.0101322	0.00614441	0.0104218			CTD-2651B20.3	-0.909992	6.94518e-08	1.72928e-07
BMX	-1.46121	4.82746e-56	5.39757e-54			CTD-2653D5.1	0.624582	0.000887926	0.00148192
BNIP1	0.193723	9.69018e-05	0.000212481			CTD-2666L21.3	0.492889	0.0017598	0.00283239
BNIP3L	-1.18766	1.94136e-34	4.56533e-33			CTD-3020H12.4	1.02335	8.19593e-11	2.56307e-10
BNIPL	-0.403703	0.0158553	0.025064			CTD-3023L14.2	1.26496	1.28889e-09	3.68253e-09
BOC	-1.0287	3.50979e-17	2.35559e-16			CTD-3030D20.1	1.13339	1.0029e-11	3.34317e-11
BOK	-1.03144	3.91103e-15	2.24783e-14			CTD-3032H12.1	1.17416	9.10412e-09	2.43535e-08
BOK-AS1	-0.462357	1.62692e-08	5.38611e-08			CTD-3035D6.1	-0.521741	1.82379e-05	3.65128e-05
BOLA2B	0.264273	1.01265e-14	5.64907e-14			CTD-3035D6.2	1.41458	8.07769e-18	4.00878e-17
BOLA3	0.807837	1.36834e-30	2.44491e-29			CTD-3049M7.1	-1.73401	1.85032e-27	1.6038e-26
BOP1	1.99904	1.21323e-49	8.35961e-48			CTD-3060P21.1	0.703868	2.64405e-05	5.20845e-05
BPGM	0.278226	4.31806e-06	1.11075e-05			CTD-3064H18.1	0.461345	0.000113745	0.000209569
BPHL	-0.155973	0.0132568	0.0212372			CTD-3064H18.2	0.507285	5.46661e-05	0.000104133
BPI	0.740245	1.50559e-11	6.49222e-11			CTD-3064H18.4	-0.733919	1.05731e-05	2.16434e-05
BPIFB2	-1.08877	6.11057e-12	2.7083e-11			CTD-3064M3.3	-0.4658	0.00129509	0.00211942
BPNT1	0.771443	8.32748e-25	9.82002e-24			CTD-3065J16.6	1.08722	9.21933e-15	3.78624e-14
BRAFP1	-0.0109087	0.000682206	0.00133755			CTD-3065J16.9	0.820944	1.13785e-11	3.77386e-11
BRAT1	0.548005	5.53646e-12	2.46343e-11			CTD-3076O17.1	-1.34892	1.06268e-20	6.32883e-20
BRCC3	0.439004	6.70029e-09	2.29687e-08			CTD-3076O17.2	-0.579577	0.000437665	0.000756572
BRD2	0.133077	0.0278372	0.0421635			CTD-3088G3.4	0.684695	4.59766e-07	1.06538e-06
BRD3	-0.176329	0.00715797	0.0120229			CTD-3088G3.8	-0.742896	1.07981e-09	3.10196e-09
BRD7	0.131972	0.00322768	0.00572473			CTD-3092A11.1	-1.13298	6.12095e-19	3.27948e-18
BRD7P2	0.0359176	0.00332511	0.00588636			CTD-3092A11.2	-0.933903	1.17012e-16	5.39925e-16
BRI3	0.358316	1.79337e-08	5.918e-08			CTD-3094K11.1	-1.69401	6.05408e-19	3.24554e-18
BRI3BP	0.604198	3.63096e-14	1.9386e-13			CTD-3099C6.5	-0.940762	7.17088e-11	2.25042e-10
BRICD5	0.381167	8.45341e-09	2.87512e-08			CTD-3105H18.18	-0.378861	0.00142874	0.00232518
BRIP1	1.07499	7.87145e-40	2.68144e-38			CTD-3116E22.7	-1.18134	3.96263e-15	1.66657e-14
BRIX1	0.837616	6.16845e-28	9.1102e-27			CTD-3128G10.6	-0.419029	0.000551475	0.000942565
BRMS1	0.888335	3.90779e-22	3.76922e-21			CTD-3131K8.2	-0.351383	9.36721e-05	0.000174214
BROX	0.3682	2.21961e-07	6.58299e-07			CTD-3131K8.3	0.64049	5.55452e-07	1.27873e-06
BRWD1-IT2	0.279419	7.85538e-10	2.91666e-09			CTD-3138B18.5	0.151701	0.0206366	0.028791
BSN-AS2	0.0257571	9.54134e-05	0.000209394			CTD-3138B18.6	0.293471	0.0129076	0.0185339
BSND	0.055247	8.36709e-05	0.000184937			CTD-3157E16.1	-0.892022	2.94832e-14	1.17244e-13
BSPRY	0.588007	0.00160849	0.00298688			CTD-3193O13.1	1.06236	1.46007e-13	5.54416e-13
BST1	-0.64782	3.81959e-15	2.19735e-14			CTD-3193O13.10	0.298886	0.008837	0.0129926
BTBD11	-0.642413	3.55536e-16	2.21224e-15			CTD-3193O13.8	1.01216	1.68122e-11	5.51441e-11
BTBD6	-0.199173	0.0117789	0.0190327			CTD-3193O13.9	2.66107	7.77188e-66	5.20603e-64
BTBD7P1	0.147476	0.00275165	0.00493299			CTD-3199J23.6	-0.537902	6.67414e-08	1.66314e-07
BTBD8	-0.365608	2.99315e-21	2.70989e-20			CTD-3203P2.1	0.891395	5.28431e-12	1.79403e-11
BTF3L4	0.472358	5.49751e-16	3.3803e-15			CTD-3203P2.2	0.35728	0.00282802	0.00444843
BTF3L4P1	0.0619838	0.000137004	0.000294532			CTD-3214H19.6	1.24365	5.06947e-14	1.9845e-13
BTF3L4P2	0.416838	4.26545e-12	1.91685e-11			CTD-3214K23.1	0.658019	4.1792e-07	9.71263e-07
BTF3L4P3	0.0330545	0.00988232	0.016214			CTD-3216D2.5	0.889083	5.29204e-13	1.93367e-12
BTF3P13	-0.0368804	0.000149479	0.000319705			CTD-3222D19.7	0.779259	3.84812e-14	1.51932e-13
BTF3P4	-0.0450123	0.00134521	0.00252929			CTD-3236F5.1	-0.473308	0.000467804	0.000806199
BTF3P5	-0.0686694	1.74353e-05	4.19511e-05			CTD-3247F14.2	-2.05753	8.50374e-18	4.21415e-17
BTG1	-0.479773	1.12178e-08	3.77623e-08			CTF1	-1.44981	7.58882e-18	3.77499e-17
BTG2	-2.1617	1.72326e-40	6.20681e-39			CTGLF10P	-0.268948	0.0354273	0.0477754
BTG3	0.77692	2.42732e-17	1.64913e-16			CTGLF12P	-0.748662	0.000311155	0.000547133
BTK	0.366038	2.21443e-05	5.25769e-05			CTHRC1	2.56786	4.62442e-58	1.96044e-56
BTLA	0.251691	5.2274e-05	0.000118605			CTSD	1.13415	6.61751e-18	3.31272e-17
BTN2A2	0.364948	4.08132e-07	1.17908e-06			CTU1	0.524839	6.603e-07	1.51002e-06
BTN2A3P	-0.104914	0.0288962	0.0436208			CTU2	0.197343	0.0205886	0.0287305
BTNL10	0.177678	2.45161e-07	7.24512e-07			CTXN1	2.82081	1.42687e-66	1.002e-64
BTNL2	-0.0903357	3.19092e-06	8.33637e-06			CUTA	0.590998	4.05695e-14	1.59925e-13
BTNL3	-0.025171	1.07751e-05	2.65392e-05			CUTC	-0.869905	2.28692e-49	6.12168e-48
BTNL8	-0.0199647	0.0274875	0.0416876			CUZD1	-0.359707	0.00140346	0.00228619
BTRC	-0.528923	6.56029e-18	4.64406e-17			CWC15	-0.13013	0.0329515	0.0446242
BUD13	0.145069	0.0120694	0.0194702			CXCL1	-2.71685	9.24731e-29	8.61314e-28
BUD31	0.653523	7.80599e-27	1.06247e-25			CXCL11	2.72833	1.5956e-31	1.71078e-30
BVES	-0.341009	1.33446e-05	3.2542e-05			CXCL12	-2.01027	6.50482e-45	1.36829e-43
BX649563.4	-0.098163	1.31528e-24	1.53169e-23			CXCL13	2.35581	4.51196e-11	1.43601e-10
BX842568.2	0.194714	1.77303e-05	4.2627e-05			CXCL14	-1.63457	2.72639e-09	7.60568e-09
BX842568.4	0.0697784	0.00563639	0.00962414			CXCL16	-0.263463	0.00204654	0.00326893
BYSL	1.40104	6.21006e-41	2.31212e-39			CXCL2	-4.79571	1.56528e-79	2.6181e-77
BZRAP1-AS1	0.0739283	0.0255732	0.0390034			CXCL5	-3.04367	4.75269e-35	6.02225e-34
BZW2	0.813616	2.82322e-22	2.75725e-21			CXCL9	2.05098	5.16698e-15	2.15797e-14
C10orf10	-1.62931	2.55932e-24	2.92436e-23			CXCR2	-1.878	7.50078e-38	1.08665e-36
C10orf107	-0.400415	8.08e-12	3.5454e-11			CXorf28	0.70273	1.68169e-08	4.39876e-08
C10orf11	-0.13488	0.010375	0.0169476			CXorf31	0.574478	1.12069e-05	2.28713e-05
C10orf111	0.0860211	0.000167622	0.000356238			CXXC5	1.0599	7.46473e-30	7.30278e-29
C10orf118	-0.443669	8.56151e-08	2.64307e-07			CYB561	1.18862	4.51734e-35	5.73194e-34
C10orf128	-1.30299	2.4031e-38	7.42313e-37			CYB561D1	-0.593896	1.09346e-10	3.38233e-10
C10orf129	-0.048927	6.4013e-05	0.00014356			CYB561D2	1.06676	1.41278e-40	2.33613e-39
C10orf131	0.0308506	0.0126496	0.0203459			CYB5B	-0.238118	4.9749e-06	1.05265e-05
C10orf32	-1.14762	3.27486e-47	1.88874e-45			CYB5R3	-0.851555	1.83397e-31	1.95875e-30
C10orf35	0.975857	1.47493e-15	8.74309e-15			CYBA	0.537204	9.51592e-05	0.000176884
C10orf54	-1.24572	4.36907e-27	6.04374e-26			CYCS	0.465894	1.21999e-10	3.75899e-10
C10orf62	-0.0100926	0.0218291	0.0336791			CYCSP10	-0.437355	8.42651e-05	0.000157398
C10orf67	0.0552848	0.000497108	0.000993507			CYGB	-1.22078	7.02001e-24	5.02303e-23
C10ORF68	-0.0522184	0.0300834	0.0452462			CYP17A1-AS1	-0.419691	0.00217178	0.00346075
C10orf76	-0.255851	4.11407e-11	1.70912e-10			CYP21A1P	2.25535	1.89867e-20	1.11346e-19
C10orf82	-0.473591	8.96014e-21	7.83959e-20			CYP2B7P	3.32745	1.48534e-16	6.80822e-16
C10orf85	0.212038	1.35264e-13	6.88117e-13			CYP2D7P	-0.367068	0.012377	0.0178148
C10orf95	0.222361	2.8416e-09	1.00667e-08			CYP2D8P	-0.761059	1.21089e-07	2.95096e-07
C11orf1	-0.480175	1.63597e-11	7.02949e-11			CYP2F2P	-0.456126	0.000866832	0.00144838
C11orf24	0.864068	1.17741e-36	3.23655e-35			CYP2R1	0.139043	0.0281702	0.0385482
C11orf31	0.83321	1.99198e-21	1.82615e-20			CYP2T2P	1.3374	2.78319e-05	5.46928e-05
C11orf42	-0.0635107	0.00147528	0.00275565			CYP2T3P	1.0022	0.000330272	0.000579273
C11orf44	-0.00625331	0.0256722	0.0391478			CYP2W1	0.576842	0.00114077	0.00187857
C11orf45	0.157229	0.000443562	0.00089192			CYP4A22-AS1	0.94579	8.42083e-12	2.82688e-11
C11orf53	-0.423777	1.95882e-07	5.83324e-07			CYP4F23P	2.24359	1.73753e-21	1.08122e-20
C11orf54	-0.561598	3.8717e-17	2.5899e-16			CYP4F29P	-0.797881	0.00402419	0.00620029
C11orf63	-0.87568	4.30525e-38	1.31209e-36			CYP51A1	0.501919	1.83401e-06	4.03404e-06
C11orf65	-0.0464259	0.000523267	0.00104242			CYP51A1P2	0.49095	1.95546e-05	3.90357e-05
C11orf70	-0.443096	1.3345e-20	1.14967e-19			CYTL1	-1.68119	7.27055e-28	6.42911e-27
C11orf71	-0.226441	0.000394232	0.000797567			D86994.2	-1.54775	2.70141e-07	6.39122e-07
C11orf72	0.0327121	5.68151e-05	0.000128277			DANCR	0.235523	0.0133807	0.0191695
C11orf73	0.178746	0.000108064	0.000235568			DAP3P1	0.351008	0.00665681	0.00995798
C11orf82	1.15684	5.57048e-47	3.14797e-45			DAP3P2	0.281604	0.00798083	0.0118093
C11orf83	0.998681	1.59751e-22	1.59839e-21			DARC	-3.44009	1.61205e-28	1.48695e-27
C11orf84	1.26373	2.902e-40	1.02598e-38			DBF4B	0.462877	2.00782e-08	5.22162e-08
C11orf85	0.0569198	0.0148643	0.0236142			DBF4P1	0.504796	4.49142e-05	8.62831e-05
C11orf89	-0.216966	0.000574793	0.00113865			DBIL5P2	-0.498677	2.82964e-05	5.55778e-05
C11orf91	0.0961074	0.000417105	0.000841134			DCAF13P3	0.294457	0.0184213	0.0259184
C11orf94	0.24765	6.79476e-12	3.00132e-11			DCTN1-AS1	0.611414	2.1836e-05	4.33953e-05
C11orf95	-0.199704	0.000915331	0.00176276			DCTPP1	1.16517	5.45065e-44	1.08926e-42
C11orf96	-0.858659	2.42792e-08	7.91288e-08			DCXR	0.668555	1.52277e-08	3.99442e-08
C12orf10	-0.312075	3.44899e-06	8.98353e-06			DDA1	0.336024	2.78909e-08	7.16285e-08
[truncated: 15,469 more rows]
