# Supplementary material for: Delineation of the Germline and Somatic Mutation Interaction Landscape in Triple-Negative and Non-Triple-Negative Breast Cancer
Source: Int J Genomics. 2020 Jul 6;2020:2641370. doi: 10.1155/2020/2641370 (PMC7364202; doi:10.1155/2020/2641370)
Supplement: Supplementary Materials — All additional results from the analysis are shown in the supplementary tables described. Supplementary Table SG: GWAS information-genetic variants and genes associated with an increased risk of developing breast cancer. Supplementary Table SM: somatic mutated genes significantly associated with TNBC vs. control and non-TNBC vs. control. Supplementary Table SN: nonsomatic mutated genes significantly associated with TNBC vs. control and non-TNBC vs. control. Supplementary Table S2A1: list of all somatic mutated genes significantly associated with TNBC. Supplementary Table S2A2: list of all somatic mutated genes significantly associated with non-TNBC. Supplementary Table S1: differentially expressed and uniquely somatic mutated genes between TNBC and non-TNBC. Supplementary Table SA3: significantly differentially expressed germline mutated genes with and without somatic mutations in TNBC. Supplementary Table SB3: significantly differentially expressed germline mutated genes with and without somatic mutations in non-TNBC. Supplementary Table S3A: genes containing both germline and somatic mutations significantly associated with TNBC. Supplementary Table S3B: genes containing both germline and somatic mutations significantly associated with non-TNBC. Supplementary Table S3C: a complete list of 251 genes containing both germline and somatic mutations distinguishing TNBC from non-TNBC. [file 2641370.f1.zip › mat.2641370.v2/TABLE S1.xlsx]

## Sheet: Sheet1
Table S1. Differentially expressed and uniquely somatic mutated genes between TNBC and non-TNBC.
Genes	Chromosome position	logFC	adj.P.Val	Somatic Mutation Event in TNBC	Somatic Mutation Event in non-TNBC
COPE	19p13.11	0.15984	0.0405284	3
ENPP5	6p21.1	-1.37638	6.09202e-17	3
RBM22	5q33.1	-0.298864	1.44425e-18	3
AGPAT9	4q21.23	0.892246	4.44755e-13	2
ALB	4q13.3	-1.24293	1.46586e-05	2
ASF1B	19p13.12	0.820686	1.65324e-14	2
BMP4	14q22.2	-1.86023	5.5867e-29	2
C3orf62	3p21.31	-0.287264	3.01101e-09	2
CALB2	16q22.2	2.07831	3.59588e-24	2
CAP1	1p34.2	0.170263	0.000287881	2
CRIP1	14q32.33	-1.00813	4.35344e-17	2
FANCF	11p14.3	-0.283574	1.77621e-06	2
FGD1	Xp11.22	0.590225	1.17831e-14	2
FHL3	1p34.3	0.704089	2.20357e-20	2
FKBPL	6p21.32	0.457056	2.10942e-11	2
GDPD5	11q13.4-q13.5	0.800801	6.06533e-13	2
GFI1	1p22.1	0.972045	3.33325e-12	2
HCP5	6p21.33	0.567213	4.39241e-06	2
HILPDA	7q32.1	0.359044	8.10204e-05	2
HOXD13	2q31.1	1.8007	6.43584e-21	2
IGSF21	1p36.13	-1.31087	3.81544e-10	2
INPP5A	10q26.3	-0.19188	7.42748e-05	2
JAG2	14q32.33	0.367762	1.98786e-05	2
KLHL26	19p13.11	-0.304441	3.68575e-10	2
LETMD1	12q13.12	-0.435339	8.94886e-19	2
MALSU1	7p15.3	0.426827	2.83228e-15	2
MAPK8IP2	22q13.33	-1.02829	3.1416e-09	2
MMP21	10q26.2	-0.48629	2.36982e-05	2
MRPL45P2	17q21.32	-0.507567	1.0773e-10	2
NCCRP1	19q13.2	2.79697	8.08e-27	2
P2RY2	11q13.4	-1.38705	4.67292e-21	2
PMP22	17p12	-0.434938	1.7035e-05	2
PROZ	13q34	-0.413717	0.0136646	2
PRSS27	16p13.3	1.27142	1.55564e-20	2
RAB1A	2p14	0.212592	5.06527e-08	2
RBM17	10p15.1	0.827296	9.20439e-74	2
RCOR3	1q32.2-q32.3	-0.595811	1.11786e-18	2
RNF130	5q35.3	0.415819	6.93617e-18	2
RNF26	11q23	0.330661	1.81882e-09	2
SNN	16p13.13	0.247726	0.000141606	2
SPNS2	17p13.2	0.822119	4.11795e-12	2
TFAP2E	1p34.3	0.939016	3.69098e-17	2
TMEM107	17p13.1	-0.154414	0.0353947	2
TOMM40L	1q23.3	0.458167	1.18893e-13	2
AAGAB	15q23	-0.602898	1.52058e-31	1
ACN9	-	1.15488	5.94272e-23	1
ACVR1	2q24.1	-0.135989	0.0185503	1
AIRE	21q22.3	0.429761	0.000486092	1
ALG1L9P	11q13.4	-0.21097	0.0229892	1
ANAPC2	9q34.3	-0.459599	1.26742e-14	1
ANKRA2	5q13.2	-1.08177	1.32387e-73	1
ANKRD29	18q11.2	-0.920829	7.13962e-10	1
ANKRD45	1q25.1	2.17003	9.55578e-54	1
AOX2P	2q33.1	-2.8712	1.64399e-76	1
APCDD1L	20q13.32	1.63665	7.61494e-20	1
APOBEC3F	22q13.1	0.328459	0.000337657	1
ARHGAP11B	15q13.2	1.03528	2.20635e-24	1
ARHGEF16	1p36.32	-0.639309	1.25595e-11	1
ARL6IP5	3p14.1	-0.217584	5.47313e-05	1
ATF7	12q13.13	-0.204144	4.16401e-06	1
ATMIN	16q23.2	0.20506	3.90506e-05	1
ATP1B3	3q23	0.885285	1.0508e-34	1
ATP5L	-	0.457317	2.41346e-13	1
ATXN1L	16q22.2	0.25993	9.06884e-05	1
BABAM1	19p13.11	0.260757	2.68256e-06	1
BATF2	11q13.1	0.956668	1.1143e-08	1
BCL2A1	15q25.1	1.77226	3.20839e-33	1
BMF	15q15.1	0.168248	0.0267522	1
BMP8A	1p34.3	-0.326546	0.00798	1
BNIP2	15q22.2	0.232545	8.26577e-07	1
C12orf76	12q24.11	-0.395937	5.20609e-16	1
C1orf210	1p34.2	-0.352273	0.000118222	1
C2orf27A	2q21.2	-1.25907	2.35135e-28	1
C8orf76	8q24.13	0.46483	2.37898e-10	1
CCDC126	7p15.3	-0.745858	9.06405e-17	1
CCDC89	11q14.1	-0.430924	0.000907471	1
CD164L2	1p36.11	0.814873	3.43296e-05	1
CD80	3q13.33	0.762087	1.90772e-08	1
CDC20	1p34.2	2.08056	7.8483e-55	1
CDC34	19p13.3	0.457567	2.18481e-09	1
CDR2L	17q25.1	0.248373	0.00111431	1
CDT1	16q24.3	1.49469	6.76012e-34	1
CENPH	5q13.2	0.398592	1.24754e-07	1
CES4A	16q22.1	-0.800358	5.3894e-07	1
CLEC3B	3p21.31	-1.04682	3.80018e-15	1
CLEC5A	7q34	0.570696	0.0002256	1
CLRN1-AS1	3q25.1	-1.08437	1.23553e-09	1
CNIH1	14q22.2	-0.234742	4.28823e-06	1
COPS2	15q21.2	-0.123323	0.0149839	1
COPS7B	2q37.1	0.467466	4.31946e-29	1
COQ4	9q34.11	-0.67936	2.45519e-27	1
CRB3	19p13.3	-0.494213	3.49686e-08	1
CRYBA1	17q11.2	-0.242397	0.0437588	1
CTSK	1q21.3	-0.561686	2.7434e-05	1
CUTA	6p21.32	0.334034	1.24308e-06	1
CXCL2	4q13.3	1.2674	5.16969e-10	1
CXXC5	5q31.2	-1.98587	3.85621e-96	1
CYB561	17q23.3	-0.481789	5.59969e-09	1
CYGB	17q25.1	-0.220114	0.0424136	1
DECR2	16p13.3	-0.466502	2.50017e-07	1
DEFB1	8p23.1	2.48761	6.37675e-23	1
DEPTOR	8q24.12	-1.02933	2.72086e-23	1
DES	2q35	0.784664	0.00165061	1
DHRS1	14q12	-0.241441	0.000176397	1
DHRS4-AS1	14q11.2	-0.713742	4.62905e-21	1
DHRS7B	17p11.2	-0.29117	4.28889e-05	1
DIO3OS	14q32.31	-0.777037	5.15683e-05	1
DIRAS1	19p13.3	1.3548	1.67856e-14	1
DRD1	5q35.2	-0.838162	5.18117e-05	1
EIF3M	11p13	0.36026	6.3752e-11	1
EMP1	12p13.1	0.374583	0.000137349	1
EMP2	16p13.13	-0.893753	1.80787e-25	1
EPHA10	1p34.3	-1.35455	9.02324e-22	1
EPHX3	19p13.12	1.33475	1.98776e-19	1
ETFA	15q24.2-q24.3	0.177436	0.0173021	1
EXOSC8	13q13.3	0.449429	1.83631e-16	1
FAM63B	-	-0.664022	8.9657e-19	1
FAM72A	1q32.1	1.46056	3.3137e-32	1
FAM96B	16q22.1	0.531844	1.55212e-12	1
FBLIM1	1p36.21	0.960217	1.04623e-23	1
FBXO45	3q29	0.510953	2.07818e-16	1
FCGR1B	1p11.2	0.371641	0.000443826	1
FITM1	14q12	-0.522437	1.18892e-05	1
FRRS1L	9q31.3	0.543137	0.0152256	1
GAR1	4q25	0.569102	9.4802e-25	1
GEMIN8	Xp22.2	-0.453657	1.00489e-15	1
GLUD1P3	10q22.2	-0.387143	5.2579e-06	1
GLYATL2	11q12.1	2.3946	1.50518e-18	1
GNAI3	1p13.3	0.231715	7.66841e-08	1
GNAQ	9q21.2	-0.375676	1.07258e-06	1
GORASP1	3p22.2	-0.136451	0.000574218	1
GPAA1	8q24.3	0.221894	0.00609638	1
GPCPD1	20p12.3	-0.178548	0.0306321	1
GPD1L	3p22.3	-1.55085	4.4739e-64	1
GPR35	2q37.3	0.256267	0.00854397	1
GPR68	14q32.11	-0.398838	0.000126467	1
GSTZ1	14q24.3	-0.571467	1.33554e-11	1
H1FX-AS1	3q21.3	-0.2096	0.0442301	1
HAX1	1q21.3	0.266351	1.8346e-06	1
HHIP	4q31.21	-0.570397	0.000177084	1
HIGD1A	3p22.1	-0.28574	0.000492478	1
HLA-F-AS1	6p22.1	0.367337	0.000759318	1
HPGD	4q34.1	-0.945136	3.32771e-05	1
HSPA6	1q23.3	0.455258	0.000847231	1
HSPB11	1p32.3	0.259805	4.26598e-05	1
HTRA2	2p13.1	0.286019	4.08779e-09	1
HYAL3	3p21.31	0.492121	4.41014e-08	1
IBA57	1q42.13	0.536462	7.95552e-15	1
ICAM2	17q23.3	0.523505	2.0981e-08	1
IER3	6p21.33	-0.767628	6.56187e-10	1
IFI30	19p13.11	0.501627	3.59113e-07	1
IFI44L	1p31.1	0.500512	0.0037876	1
IGF2	11p15.5	-1.19363	3.43587e-12	1
IGKV2-24	2p11.2	0.748908	0.00797552	1
IL11	19q13.42	0.367187	0.00382768	1
IL19	1q32.1	-1.26066	3.49072e-08	1
IL27	16p12.1-p11.2	0.397393	0.00177908	1
IRF2	4q35.1	-0.115834	0.00838047	1
ISG20	15q26.1	0.578417	3.1627e-07	1
ISOC1	5q23.3	-0.743484	1.4763e-10	1
ITGB1BP1	2p25.1	0.428956	9.53431e-19	1
ITPA	20p13	0.228215	0.00106025	1
KAT5	11q13.1	-0.114821	0.0139954	1
KBTBD3	11q22.3	-0.643516	6.33882e-23	1
KCNE2	21q22.11	0.440123	3.71632e-06	1
KCNJ9	1q23.2	1.11445	4.57562e-17	1
KHDC1	6q13	1.13894	6.56478e-17	1
KIR3DX1	19q13.42	0.980147	1.13787e-14	1
KLRF1	12p13.31	0.32455	0.0428417	1
KRR1	12q21.2	-0.221125	2.48867e-05	1
KRT18P55	17q11.2	-0.945827	1.12286e-12	1
KRT7	12q13.13	1.59529	3.176e-12	1
LA16c-380H5.4	-	0.846037	8.41566e-05	1
LAMP1	13q34	0.304996	3.66454e-08	1
LAT	16q13	0.326757	0.0106727	1
LEMD1	1q32.1	4.27994	6.38195e-81	1
LINC00087	-	1.03829	3.62132e-17	1
LINC00634	22q13.2	1.97545	5.80639e-40	1
LIPJ	10q23.31	0.330006	0.0120144	1
LMF2	22q13.33	0.332839	5.83039e-06	1
LPCAT2	16q12.2	0.389427	6.00986e-05	1
MAP3K14	17q21.31	0.273515	0.000391604	1
MCM8	20p12.3	0.50636	2.25086e-11	1
MED31	17p13.1	-0.106805	0.0266168	1
MEX3A	1q22	1.891	1.11188e-39	1
MIR24-2	19p13.12	0.462356	0.00011741	1
MLKL	16q22.3	0.778716	8.06309e-22	1
MPLKIP	7p14.1	0.313843	8.48167e-11	1
MRPL12	17q25.3	0.755977	1.5875e-09	1
MRPS26	20p13	0.182406	0.0239571	1
MS4A15	11q12.2	-2.22323	3.00486e-12	1
MSL3P1	2q37.1	2.10137	9.24353e-31	1
MT1DP	16q13	-0.689327	4.74599e-05	1
MT1G	16q13	1.48615	2.97988e-10	1
MYC	8q24.21	0.978947	2.0096e-15	1
NAA50	3q13.31	0.460586	1.35089e-17	1
NAGS	17q21.31	-0.913374	9.9862e-12	1
NAIP	5q13.2	-0.427291	0.000169639	1
NAPSA	19q13.33	-0.270645	0.0263762	1
NDUFB10	16p13.3	-0.260938	0.000738121	1
NDUFB3	2q33.1	0.180222	0.000750166	1
NFIX	19p13.13	0.899178	1.7937e-14	1
NODAL	10q22.1	0.424909	0.000445375	1
NR2C2AP	19p13.11	0.404465	9.00803e-09	1
NR2F2	15q26.2	-0.551426	4.29059e-07	1
NUDT16L1	16p13.3	-0.737387	3.8479e-23	1
OIP5	15q15.1	1.00784	2.73974e-23	1
OXA1L	14q11.2	-0.0951409	0.0474023	1
PDIA6	2p25.1	0.911221	1.78545e-37	1
PDK3	Xp22.11	0.553612	2.03874e-12	1
PDZD9	16p12.2	-0.491955	2.49876e-05	1
PGAM5	12q24.33	0.5063	4.57533e-19	1
PIH1D2	11q23.1	-1.19598	2.35413e-34	1
PKMYT1	16p13.3	0.891304	1.92867e-11	1
PLAC9	10q22.3	-0.781812	6.39981e-08	1
PLAGL1	6q24.2	1.38567	8.97878e-30	1
PNLIPRP2	10q25.3	-1.3887	1.7202e-09	1
PNPLA4	Xp22.31	-1.25835	5.98486e-49	1
PPIE	1p34.2	0.479407	4.6027e-18	1
PRKCI	3q26.2	0.356812	1.09639e-09	1
PTRHD1	2p23.3	0.336643	7.838e-07	1
RBM7	11q23.1-q23.2	0.432	9.50958e-14	1
RHBDL1	16p13.3	-1.56298	7.03159e-24	1
RHOD	11q13.2	-0.248952	0.0171759	1
RIMKLA	1p34.2	-0.743831	2.1378e-05	1
RLN1	9p24.1	-1.24524	4.63789e-20	1
RNF112	17p11.2	0.914419	9.97354e-12	1
RNF150	4q31.21	1.21339	1.76198e-18	1
RNF24	20p13	0.68142	9.06658e-18	1
RPL31	2q11.2	0.190697	0.00755861	1
RPS28	19p13.2	0.3216	0.000573718	1
RRAGB	Xp11.21	-0.288762	1.59457e-07	1
RSPO1	1p34.3	-0.602773	0.00662957	1
S100A10	1q21.3	1.04564	2.14036e-22	1
S100A14	1q21.3	-0.962623	7.54051e-06	1
S100A3	1q21.3	1.1994	1.04187e-24	1
S100B	21q22.3	2.95294	2.48407e-42	1
SAP30	4q34.1	0.726888	3.69518e-18	1
SBSN	19q13.13	3.68617	2.31007e-45	1
SELENBP1	1q21.3	-1.25195	2.83358e-32	1
SEMA6B	19p13.3	-0.680184	5.72536e-09	1
SERPINB2	18q21.33-q22.1	1.88016	2.94008e-13	1
SETD9	5q11.2	-0.486602	1.37855e-08	1
SF3B5	6q24.2	0.454218	2.79702e-10	1
SH3GL3	15q25.2	2.85862	9.46593e-51	1
SIRT4	12q24.31	0.174974	0.0184878	1
SLC15A3	11q12.2	0.258995	0.00831277	1
SLC16A3	17q25.3	0.68977	3.63769e-08	1
SLC22A18AS	11p15.4	-0.471414	0.000190443	1
SLC50A1	1q22	-0.251062	0.00200894	1
SLC7A2	8p22	-4.06088	9.23227e-56	1
SLC9A3R2	16p13.3	-0.903979	2.95724e-18	1
SMCO2	12p11.23	0.400488	0.00212956	1
SPDYA	2p23.2	0.379081	3.92274e-05	1
SPSB1	1p36.22	0.700863	1.32804e-14	1
SPTSSB	3q26.1	-2.07464	2.5663e-15	1
SRSF7	2p22.1	0.277863	1.44104e-16	1
STC1	8p21.2	-0.676841	0.00028166	1
STK16	2q35	-0.439888	1.59183e-19	1
STMN3	20q13.33	-0.846663	4.00799e-10	1
SURF4	9q34.2	0.155408	0.000867258	1
TADA3	3p25.3	-0.136334	0.0102321	1
TCEAL5	Xq22.1	-0.604436	0.00444126	1
TCEB1	-	0.372808	2.71144e-07	1
TEX38	1p33	-0.350583	0.00275919	1
TIMP4	3p25.2	-1.26899	3.67079e-08	1
TMEM192	4q32.3	-0.705108	1.25123e-30	1
TMEM206	1q32.3	0.856343	7.95767e-39	1
TMEM65	8q24.13	1.0206	7.03753e-34	1
TMUB2	17q21	-0.186192	0.000388373	1
TNFRSF10D	8p21.3	0.933489	1.65171e-13	1
TP53INP1	8q22.1	-1.48843	1.77732e-57	1
TRABD	22q13.33	0.51442	1.29919e-09	1
TRAV13-2	14q11.2	0.415863	0.0112484	1
TRBV30	7q34	0.510161	0.00474025	1
TRIQK	8q22.1	-0.957695	9.89047e-26	1
TSACC	1q22	0.241282	0.020633	1
TSPAN18	11p11.2	0.295649	0.00159476	1
UBALD2	17q25.1	0.883961	2.23402e-28	1
UQCR11	19p13.3	-0.219857	0.00213721	1
UQCRB	8q22.1	0.34426	7.4191e-07	1
USMG5	-	0.274651	4.52987e-05	1
VIMP	-	0.211058	0.000351015	1
WBP1L	10q24.32	-0.677299	2.38896e-37	1
WNT7B	22q13.31	-0.853321	1.31485e-06	1
YOD1	1q32.1	1.0474	6.02439e-21	1
YWHAH	22q12.3	0.350676	6.10261e-11	1
ZNF222	19q13.31	-0.16368	0.0266706	1
ZNF302	19q13.11	-0.415339	2.31808e-12	1
ZNF80	3q13.31	0.797738	1.32997e-06	1
GATA3	10p14	-4.08869	5.11364e-133		99
FOXA1	14q21.1	-5.33435	3.57372e-144		23
FRMPD4	Xp22.2	0.719577	3.50204e-07		21
WNK3	Xp11.22	1.42426	8.41582e-20		18
PHKA2	Xp22.13	-0.0982986	0.0474785		17
ACACB	12q24.11	-0.972375	7.78694e-15		16
NRCAM	7q31.1	-0.681701	0.000413398		16
RAB3GAP2	1q41	-0.140981	0.0257319		16
SETX	9q34.13	-0.213524	0.000374848		16
CBLB	3q13.11	0.137587	0.0110194		15
COL4A6	Xq22.3	-1.71277	7.98878e-15		15
DOCK3	3p21.2	1.5016	6.64537e-18		15
ABCB11	2q31.1	-0.340157	0.049307		14
CDH8	16q21	-0.433798	0.00481695		14
CNTNAP3B	9p11.2	0.917993	1.63712e-06		14
DSE	6q22.1	0.219017	0.0169365		14
FRMD4A	10p13	0.72881	2.8812e-24		14
GNAS	20q13.32	0.536536	5.11768e-13		14
HIVEP1	6p24.1	0.170415	0.0323895		14
KCNH7	2q24.2	0.287681	0.0305683		14
KIF13A	6p22.3	-0.453791	1.47935e-10		14
TNC	9q33.1	0.446865	0.00990451		14
ZNF831	20q13.32	0.668891	0.000811331		14
ABCC4	13q32.1	1.04756	1.11724e-15		13
ADAMTS7	15q25.1	0.499188	1.39307e-06		13
CCDC88C	14q32.11-q32.12	-0.435597	1.96975e-07		13
CDH26	20q13.33	0.47663	0.00015576		13
IGF2R	6q25.3	0.34991	3.27498e-07		13
IKBKAP	-	-0.325424	7.13035e-11		13
PTPN13	4q21.3	-0.926761	2.8506e-12		13
TCF4	18q21.2	-0.378669	6.90691e-05		13
TIAM2	6q25.2-q25.3	0.752767	4.86356e-25		13
ADGB	6q24.3	-1.30656	3.2843e-14		12
CDH12	5p14.3	0.810439	5.53033e-05		12
CDH24	14q11.2	0.47759	5.03832e-09		12
CHI3L1	1q32.1	2.78757	4.38875e-35		12
KIF1A	2q37.3	3.88489	2.93149e-31		12
MAGI3	1p13.2	-0.849316	1.97904e-17		12
MYB	6q23.3	-2.75175	1.59068e-86		12
PCDHGB6	5q31	-0.432126	0.000224974		12
PHF8	Xp11.22	-0.340825	3.06048e-09		12
RGS7	1q43	-0.978913	2.91459e-06		12
SEMA5A	5p15.31	-1.00715	2.85348e-16		12
THEM5	1q21.3	0.628697	8.64678e-09		12
ADAMTS12	5p13.3-p13.2	-0.521558	5.86799e-05		11
ADAMTS9	3p14.1	0.867034	4.14353e-15		11
ALDH1L1	3q21.3	0.553696	0.00858825		11
ATP11C	Xq27.1	0.890651	6.91911e-31		11
CALD1	7q33	0.47312	8.60934e-07		11
EFCAB6	22q13.2-q13.31	-1.8276	3.67815e-55		11
GPRASP2	Xq22.1	-0.326984	6.41171e-05		11
IFT122	3q21.3-q22.1	-0.650765	1.87161e-22		11
JAK1	1p31.3	-0.206237	0.000886044		11
KCNJ12	17p11.2	-0.318242	0.0410557		11
MAGI2	7q21.11	-0.829689	1.02596e-11		11
MAP1B	5q13.2	0.271603	0.0281196		11
NFE2L3	7p15.2	1.54068	5.57773e-49		11
OCRL	Xq26.1	-0.153497	0.0142009		11
PHF12	17q11.2	-0.491473	9.93014e-19		11
PLCG1	20q12	0.265854	2.0573e-06		11
PTPRM	18p11.23	-0.341301	0.00015142		11
RAD54B	8q22.1	0.683879	3.18132e-13		11
SEC24B	4q25	-0.259759	1.39211e-06		11
SIPA1L3	19q13.13-q13.2	-0.324825	5.03948e-07		11
SLITRK2	Xq27.3	1.00528	3.99339e-10		11
SORBS2	4q35.1	0.623516	0.000145805		11
TNS1	2q35	-0.494174	2.82668e-08		11
TRAPPC8	18q12.1	-0.188457	0.00332923		11
YEATS2	3q27.1	1.07759	2.51918e-72		11
ACAN	15q26.1	1.19168	1.06517e-12		10
ADAMTS3	4q13.3	1.27803	3.60421e-24		10
AR	Xq12	-4.05644	2.54113e-107		10
ATG2B	14q32.2	-0.634354	1.2922e-24		10
ATG9B	7q36.1	0.716575	2.36877e-08		10
ATP7B	13q14.3	-1.89939	6.06102e-48		10
BLM	15q26.1	1.33331	3.35189e-39		10
COL17A1	10q25.1	-0.972266	0.000759293		10
CRAMP1L	-	-0.193522	0.00168105		10
DCLK1	13q13.3	-1.46176	1.47556e-16		10
DENND2C	1p13.2	0.627473	2.9293e-10		10
DNM3	1q24.3	0.355207	0.000619804		10
EPHA5	4q13.1-q13.2	-0.436447	0.00368206		10
EPRS	1q41	0.47144	2.1786e-13		10
ERBB2IP	-	-0.570415	1.5225e-20		10
GPR64	-	1.58948	3.72142e-28		10
GRIA4	11q22.3	-0.6385	0.0156024		10
HSPD1	2q33.1	0.56593	1.25879e-14		10
KCNH1	1q32.2	-3.19917	1.75588e-47		10
L3MBTL3	6q23.1	0.428105	2.40574e-09		10
MED14	Xp11.4	0.173096	0.00322145		10
MID1	Xp22	2.14179	1.18616e-51		10
MTHFD1	14q23.3	0.207922	0.000124666		10
MYO6	6q14.1	-0.696712	6.20254e-18		10
NLRP9	19q13.43	0.542028	3.48332e-05		10
NOS2	17q11.2	0.462245	3.05041e-05		10
OTUD4	4q31.21	0.13764	0.0298142		10
PCDH9	13q21.32	0.442422	0.019317		10
PITPNM1	11q13.2	0.221073	0.0227692		10
RARB	3p24.2	0.940908	3.91231e-17		10
ROR1	1p31.3	1.03108	1.83173e-14		10
ROR2	9q22.31	-0.693984	1.25489e-08		10
RUNX1T1	8q21.3	-0.828417	5.60618e-12		10
SELP	1q24.2	-0.648305	0.00319982		10
UBAP2L	1q21.3	0.308457	1.15071e-10		10
ULK4	3p22.1	-1.03679	3.92181e-34		10
VWDE	7p21.3	1.58275	2.93562e-10		10
AKAP11	13q14.11	-0.438665	1.12455e-08		9
ALPK2	18q21.31-q21.32	0.570919	0.000404144		9
AMY2B	1p21.1	-0.337126	0.00916456		9
ARHGEF40	14q11.2	-0.187047	0.0107282		9
ARHGEF4	2q21.1	1.95906	1.33664e-37		9
ATP8B3	19p13.3	-1.03499	9.83521e-18		9
AVL9	7p14.3	-0.269945	3.11711e-05		9
BAI2	-	-2.14124	1.27751e-42		9
BRIP1	17q23.2	0.697618	2.14719e-08		9
BTK	Xq22.1	0.329735	0.000852963		9
C17orf97	17p13.3	-0.871134	3.0888e-19		9
C5	9q33.2	-0.754346	3.6187e-17		9
CCDC80	3q13.2	-0.491602	0.00073283		9
CEP120	5q23.2	-0.71086	2.92269e-35		9
CLEC16A	16p13.13	-0.155804	0.00131861		9
CYP24A1	20q13.2	1.94261	1.42051e-13		9
DGKG	3q27.2-q27.3	1.28999	8.59854e-32		9
DNM2	19p13.2	0.273051	2.27868e-10		9
DYRK1A	21q22.13	0.097116	0.0304193		9
EIF4G1	3q27.1	0.429639	2.02264e-18		9
ESYT1	12q13.2	-0.160773	0.00217049		9
FDPS	1q22	0.555137	4.15562e-19		9
FOXP1	3p13	-1.07376	3.76172e-50		9
GTSE1	22q13.31	1.60973	1.53608e-41		9
HDAC1	1p35.2-p35.1	0.236616	1.09944e-05		9
ITIH2	10p14	-0.889705	9.31511e-07		9
KAT2B	3p24.3	-0.173919	0.046744		9
KCNB1	20q13.13	0.721029	0.000272982		9
KDR	4q12	-0.219496	0.0140183		9
LILRB1	19q13.42	0.564487	1.00994e-07		9
LTK	15q15.1	1.01146	2.07658e-10		9
MAP3K15	Xp22.12	0.889016	3.01649e-14		9
MCM10	10p13	1.84563	7.75987e-39		9
MCM7	7q22.1	1.09113	2.89303e-47		9
MKL2	16p13.12	-1.21474	1.50058e-48		9
MRE11A	-	0.277367	9.42991e-08		9
NEK5	13q14.3	-2.34862	8.1912e-70		9
NXF5	Xq22.1	-0.96325	2.20645e-11		9
PARD3	10p11.22-p11.21	0.479928	4.86651e-10		9
POU6F2	7p14.1	0.846435	4.44738e-05		9
PRKCE	2p21	-0.258311	0.00620336		9
PRKD3	2p22.2	1.17487	1.25266e-35		9
PTCH2	1p34.1	0.39887	0.000682898		9
RAB11FIP1	8p11.23	-1.27368	7.60072e-17		9
RAG1	11p12	0.311722	0.00469866		9
RHBDF2	17q25.3	0.99837	2.25973e-40		9
ROBO4	11q24.2	-0.243622	0.00621729		9
SH3BP4	2q37.2	-0.747692	2.03242e-17		9
SLC30A5	5q13.1-q13.2	-0.46873	2.38472e-21		9
SLC35B2	6p21.1	0.458785	7.52155e-15		9
SLC35F3	1q42.2	1.90968	1.63148e-16		9
STARD8	Xq13.1	-0.278525	0.000457432		9
TMC5	16p12.3	-3.66948	1.24917e-49		9
TSHR	14q24-q31	0.755084	3.20735e-07		9
UGGT1	2q14.3	0.185443	0.000923303		9
WAS	Xp11.23	0.567227	3.90161e-08		9
ABCF1	6p21.33	0.56619	8.59854e-31		8
ACOXL	2q13	0.585469	0.000105365		8
ACSS3	12q21.31	-1.04894	6.34311e-13		8
ADAM19	5q33.3	0.778308	9.71171e-13		8
ADCY3	2p23.3	0.678321	7.56094e-20		8
AKNA	9q32	0.338043	0.000103312		8
ALOXE3	17p13.1	-1.05181	3.83497e-09		8
APP	21q21.3	0.649347	1.70559e-16		8
ARHGAP12	10p11.22	-0.36886	3.58112e-08		8
BMX	Xp22.2	-0.585473	0.000211842		8
CAMSAP3	19p13.2	-0.345611	0.000233858		8
CD22	19q13.12	-1.02848	2.51899e-12		8
CDK14	7q21.13	-0.371152	9.28557e-05		8
CHTF18	16p13.3	0.294973	0.00754539		8
CLCN4	Xp22.2	2.3045	3.19813e-64		8
COASY	17q21.2	-0.525562	3.3467e-15		8
COL1A1	17q21.33	-0.731647	8.64273e-07		8
CRISPLD1	8q21.13	1.5424	1.19192e-13		8
CTAGE5	14q21.1	-0.441338	6.13089e-14		8
CUX1	7q22.1	-0.22673	0.000320692		8
DENND2D	1p13.3-p13.2	-0.703897	3.95226e-23		8
DSC2	18q12.1	2.38359	9.69764e-56		8
EFTUD2	17q21.31	0.222332	5.47452e-06		8
EHBP1	2p15	0.645411	7.42916e-32		8
ELP2	18q12.2	-1.20366	7.24791e-27		8
EML2	19q13.32	-0.821663	5.9679e-24		8
EMR3	-	0.459117	0.00326997		8
ENPP4	6p21.1	-0.475041	3.6391e-05		8
EPAS1	2p21	-0.274901	0.0016613		8
EPHA1	7q34-q35	0.188951	0.00938525		8
EWSR1	22q12.2	0.204709	1.25189e-07		8
EXOC2	6p25.3	-0.712254	5.44194e-15		8
EXOC3	5p15.33	-0.118005	0.00927448		8
EXOSC9	4q27	0.226487	1.31021e-06		8
FASTKD2	2q33.3	0.162258	0.000334364		8
FRMD3	9q21.32	1.59097	2.13684e-37		8
GAS6	13q34	-0.421625	0.000135035		8
GLB1L3	11q25	0.459281	0.0142187		8
GNL3L	Xp11.22	0.238432	0.00495924		8
GORAB	1q24.2	0.305799	4.12171e-07		8
IGF1R	15q26.3	-1.66409	7.76689e-33		8
KCNK9	8q24.3	1.46841	5.73625e-19		8
KIAA1107	1p22.1	-0.307218	0.000823669		8
KIAA1549	7q34	0.310322	0.000556884		8
LAMB3	1q32.2	1.04352	8.16859e-09		8
LEPRE1	-	0.450078	5.96556e-10		8
MAGED2	Xp11.21	-1.7147	1.16239e-62		8
MARK1	1q41	0.85726	5.64031e-09		8
MBD6	12q13.3	-0.528517	7.47023e-20		8
MCTP2	15q26.2	1.43719	1.54451e-20		8
MTTP	4q23	1.27222	1.25718e-16		8
NDST1	5q33.1	-0.336087	3.86377e-07		8
NFATC3	16q22.1	0.340445	6.73995e-07		8
PCDHA3	5q31.3	-1.10146	4.08341e-08		8
PCID2	13q34	0.408438	1.02703e-15		8
PDE6A	5q32	0.93038	7.63288e-13		8
PDGFRB	5q32	-0.663539	6.90213e-12		8
PGK1	Xq21.1	0.48011	3.67096e-12		8
PKP4	2q24.1	-0.125272	0.0256697		8
PLA2G4A	1q31.1	1.77672	1.0834e-41		8
PMS1	2q32.2	0.221622	4.58413e-07		8
POP1	8q22.2	1.06361	1.68019e-44		8
PREPL	2p21	-0.461646	7.04835e-15		8
PRKCQ	10p15.1	1.40743	2.12308e-18		8
PRKRIR	-	0.398532	6.81059e-08		8
RBM33	7q36.3	0.240968	3.21113e-08		8
RFX3	9p24.2	0.226031	0.0276756		8
RPRD1B	20q11.23	-0.190217	0.00061902		8
RPS6KA1	1p36.11	0.289221	3.53108e-05		8
SEMA5B	3q21.1	0.934168	4.8067e-18		8
SHISA9	16p13.12	-1.78328	1.70661e-09		8
SLC16A1	1p13.2	1.65264	7.55802e-40		8
SNX25	4q35.1	-0.689276	1.03212e-22		8
SPARCL1	4q22.1	-1.05491	5.39752e-21		8
TBC1D1	4p14	1.00334	5.33071e-48		8
TCEB3	-	0.283454	5.94996e-12		8
TFAP2A	6p24.3	-0.402518	5.57868e-05		8
TPM2	9p13.3	0.52793	2.90193e-05		8
TPTE2	13q12.11	0.804292	4.59338e-08		8
TRAFD1	12q24.13	-0.331323	2.37669e-10		8
TRPS1	8q23.3	-0.782036	1.84508e-11		8
TTYH2	17q25.1	0.618518	1.09583e-10		8
USP48	1p36.12	0.111913	0.00883486		8
WDR46	6p21.32	0.462305	1.23569e-15		8
WIZ	19p13.12	0.328052	8.65345e-10		8
XPC	3p25.1	-0.605419	6.73254e-33		8
XPO7	8p21.3	0.291651	1.37836e-07		8
ZBED4	22q13.33	0.675817	2.978e-27		8
ZC3H6	2q14.1	-0.527939	1.95262e-13		8
ZFP36L2	2p21	0.276447	0.0047269		8
ZFYVE26	14q24.1	-0.332797	7.52789e-09		8
ZNF799	19p13.2	-0.801442	3.14104e-31		8
SPRY3	Xq28 and Yq12	0.786214	3.03645e-25		7
ABCF2	7q36.1	0.445282	8.10362e-25		7
ACSL4	Xq23	0.884124	3.69649e-19		7
ADCY4	14q12	-0.458519	1.32872e-05		7
ADD1	4p16.3	-0.469338	7.78245e-34		7
AKAP1	17q22	0.240061	0.00120079		7
AKNAD1	1p13.3	-0.269277	0.0319637		7
ANGEL2	1q32.3	-0.407139	4.91898e-14		7
ANKRD31	5q13.3	-0.814872	1.63254e-10		7
APLF	2p13.3	1.06013	6.8664e-26		7
ARHGAP28	18p11.31	0.603663	1.49354e-05		7
ATF7IP	12p13.1	0.136604	0.0214364		7
ATP12A	13q12.12	1.63609	2.13257e-16		7
BBS10	12q21.2	-0.366749	8.44474e-09		7
BCHE	3q26.1	-0.426342	0.0365016		7
BMPR1B	4q22.3	-3.01865	3.32028e-18		7
BTNL8	5q35.3	0.447955	0.00300193		7
C11orf63	-	-0.573906	8.86231e-06		7
C15orf52	-	1.12161	2.20209e-19		7
CARM1	19p13.2	0.476943	2.98051e-19		7
CAST	5q15	-0.318648	3.28766e-08		7
CBL	11q23.3	0.37716	1.84095e-08		7
CCDC146	7q11.23	-0.566188	6.51498e-10		7
CCDC183	9q34.3	-1.14908	1.48962e-32		7
CCDC57	17q25.3	-0.63884	5.53357e-15		7
CCR2	3p21.31	0.605855	0.000344381		7
CCT8	21q21.3	0.449498	4.47071e-17		7
CD109	6q13	0.622109	8.44027e-06		7
CD19	16p11.2	1.26349	3.62018e-08		7
CDH6	5p13.3	-0.593096	6.15806e-10		7
CHAF1A	19p13.3	0.633279	1.81482e-19		7
CHL1	3p26.3	-0.435101	0.0344388		7
CHN1	2q31.1	0.44681	9.02566e-07		7
CLASP2	3p22.3	-0.493868	3.87617e-15		7
CNPY3	6p21.1	0.285645	1.33307e-05		7
COMP	19p13.11	-1.45502	1.06533e-12		7
COX10	17p12	0.352282	3.91119e-14		7
CTNND1	11q12.1	-0.137865	0.028468		7
CXCR3	Xq13.1	0.724221	5.61141e-05		7
DACH2	Xq21.2	-0.396114	0.0308625		7
DHX37	12q24.31	0.273621	5.26288e-07		7
EBF1	5q33.3	-0.473873	1.36906e-05		7
ECD	10q22.2	-0.254374	1.10597e-08		7
EDA2R	Xq12	-1.21611	2.93972e-25		7
EFCAB12	3q21.3	-2.5334	1.85269e-60		7
EGFLAM	5p13.2-p13.1	-0.250025	0.00933914		7
ELAC2	17p12	0.226815	1.3731e-06		7
ELF4	Xq26.1	0.483319	1.00819e-12		7
EMILIN2	18p11.32-p11.31	0.848992	5.29688e-17		7
EML4	2p21	0.870117	1.73427e-48		7
EPN1	19q13.42	0.154765	0.0287056		7
ESR1	6q25.1-q25.2	-6.38835	1.43334e-174		7
ETS1	11q24.3	0.67209	1.3496e-12		7
FANCC	9q22.32	0.528531	6.05667e-17		7
FGF18	5q35.1	-1.00713	7.8847e-15		7
FLT3	13q12.2	-1.47924	7.88714e-11		7
GBP6	1p22.2	0.52314	0.00246878		7
GOLGA2P5	12q23.1	-1.05105	8.27085e-27		7
GP2	16p12.3	-6.58076	3.69798e-82		7
GPAM	10q25.2	-0.343674	0.00027863		7
GPR97	-	1.39316	1.15213e-18		7
GRAMD1B	11q24.1	0.819563	1.98489e-13		7
GRIP2	3p25.1	0.473776	0.000155717		7
GTF2IRD2P1	7q11.23	0.653746	8.29812e-07		7
HCN1	5p12	-0.986536	2.38485e-08		7
HNRNPA2B1	7p15.2	0.182773	5.1689e-07		7
HNRNPR	1p36.12	0.153842	4.38474e-05		7
JUP	17q21.2	-0.317041	6.97735e-06		7
KANK1	9p24.3	0.749557	9.19134e-16		7
KIF19	17q25.1	1.17973	3.53194e-10		7
KIRREL3	11q24.2	1.6064	7.13447e-26		7
LAMC3	9q34.12	0.359105	0.031093		7
LIPE	19q13.2	-1.09881	9.07809e-12		7
LMO7	13q22.2	0.390647	2.53885e-05		7
LRRN3	7q31.1	-0.880321	1.94254e-07		7
MARK2	11q13.1	0.205631	0.000234329		7
MYO1D	17q11.2	-0.296381	1.94578e-05		7
MYOCD	17p12	-1.03889	7.1603e-10		7
NEDD4	15q21.3	-0.668059	1.44676e-16		7
NELL2	12q12	-1.62733	5.11651e-11		7
NRG3	10q23.1	0.395702	0.0494791		7
OR51E2	11p15.4	-0.580773	7.98533e-05		7
PAM	5q21.1	0.439325	1.16096e-05		7
PARPBP	12q23.2	0.834944	1.55725e-20		7
PAXBP1	21q22.11	0.377855	1.17648e-12		7
PCDHB5	5q31.3	-0.497923	0.00310789		7
PCDHGA9	5q31	-0.791988	6.98027e-09		7
PDE1C	7p14.3	1.12886	4.52944e-13		7
PKP1	1q32.1	2.7978	7.27458e-26		7
PLEKHM1	17q21.31	-0.206356	6.53424e-05		7
PLK1	16p12.2	1.64198	9.37025e-39		7
PPARGC1B	5q32	1.12339	1.08772e-26		7
PTCHD2	-	-1.07905	2.39406e-07		7
PTENP1	9p13.3	-0.458469	6.68695e-07		7
PTHLH	12p11.22	-0.614253	0.00287964		7
PTPRH	19q13.4	-0.410035	0.0203666		7
RASGRF2	5q14.1	-0.538333	2.9307e-07		7
RBM20	10q25.2	-0.801799	7.64642e-05		7
RBM39	20q11.22	-0.307138	4.00934e-14		7
RBMS3	3p24.1	-0.613576	1.06487e-07		7
RNF182	6p23	2.12924	2.58844e-34		7
RPH3A	12q24.13	0.421491	0.00639367		7
SERPINA12	14q32.13	-1.25148	1.14309e-07		7
SERPINC1	1q25.1	-0.815882	7.02957e-09		7
SFI1	22q12.2	-0.561779	5.55197e-15		7
SIMC1	5q35.2	0.804355	2.74368e-15		7
SLC12A3	16q13	0.574966	0.0010284		7
SLC12A6	15q14	0.176648	0.0203991		7
SLC9A1	1p36.11	-0.592065	1.29799e-21		7
SLC9A6	Xq26.3	1.20964	1.15968e-40		7
SLITRK5	13q31.2	1.39092	8.53271e-09		7
SLK	10q24.33-q25.1	-0.325967	2.02207e-09		7
SMC2	9q31.1	0.387553	3.23239e-07		7
SOS2	14q21.3	-0.184271	0.000890938		7
SPTY2D1	11p15.1	-0.324024	2.2165e-08		7
SRGAP3	3p25.3	-0.388072	5.41231e-05		7
STAC	3p22.3-p22.2	3.01545	4.88566e-72		7
STON1	2p16.3	0.676856	3.7852e-11		7
TACC1	8p11.22	-0.241038	0.0377189		7
TICRR	15q26.1	1.74653	3.55383e-46		7
TLE3	15q23	-0.892805	1.49173e-46		7
TLL2	10q24.1	-0.469175	0.00123609		7
TMCC1	3q22.1	-0.138031	0.00484631		7
TMEM132A	11q12.2	0.78855	6.67425e-11		7
TPM3	1q21.3	0.191271	0.000204057		7
TRAF3IP3	1q32.2	1.09163	1.08697e-18		7
TRIB2	2p24.3	0.565211	1.19091e-08		7
TRIM37	17q22	-0.233918	0.00268521		7
TRMT2A	22q11.21	0.348203	3.95017e-06		7
TRPV6	7q34	2.20796	4.4853e-19		7
TTBK2	15q15.2	-0.374587	2.79709e-09		7
TTC37	5q15	-0.470589	1.40697e-14		7
UCP2	11q13	-0.40504	0.00082336		7
ULK2	17p11.2	-0.318813	5.33815e-05		7
USP4	3p21.31	-0.161683	2.73682e-05		7
USP53	4q26	-0.552984	2.80713e-10		7
VSIG1	Xq22.3	0.498126	0.00149221		7
WDR74	11q12.3	0.586743	6.41582e-19		7
ZFYVE19	15q15.1	-0.408969	5.74568e-11		7
ZMYND8	20q13.12	-0.614379	5.59759e-18		7
ZNF347	19q13.3	-0.22827	0.0012324		7
ZNF366	5q13.1	-0.394177	0.00438606		7
ZNF397	18q12.2	-0.246486	5.78682e-05		7
ZNF483	9q31.3	-0.945864	1.69572e-12		7
ZNF609	15q22.1	-0.455366	3.496e-13		7
ZNF618	9q32	0.33584	5.96206e-07		7
ZNF700	19p13.2	-0.421818	2.38534e-13		7
ZNF726	19p12	0.699461	3.43426e-08		7
ACOT2	14q24.3	-0.682286	1.09595e-20		6
ADH5	4q23	0.216083	6.55773e-08		6
ALCAM	3q13.11	-1.55601	5.64194e-36		6
ANAPC7	12q24.11	0.112571	0.0107699		6
ANKRD32	-	-0.432315	3.07128e-13		6
ANXA1	9q21.13	1.07478	2.35575e-22		6
AP2B1	17q12	-0.773636	5.10171e-26		6
AP4M1	7q22.1	0.153678	0.00661821		6
APLP1	19q13.12	0.653502	0.000521363		6
ARMC3	10p12.2	-1.48242	3.8125e-11		6
ASB9	Xp22.2	0.449073	0.000224018		6
ASIC1	12q13.12	0.494835	0.000140396		6
BAHD1	15q15.1	-0.199012	0.000213784		6
BANK1	4q24	0.624054	0.000818697		6
BCKDK	16p11.2	-0.321945	7.11872e-08		6
BOC	3q13.2	0.988354	7.87752e-13		6
C10orf55	10q22.2	0.449112	0.000161849		6
C2orf47	-	0.245307	2.80586e-08		6
CAND2	3p25.2	0.813837	1.93133e-09		6
CBX2	17q25.3	2.19201	4.22709e-37		6
CCDC138	2q13	0.715544	5.68909e-24		6
CCDC173	2q31.1	-1.58995	1.96585e-40		6
CD96	3q13.13-q13.2	0.891637	1.61598e-07		6
CDC25C	5q31.2	0.767863	2.49715e-10		6
CDC6	17q21.2	0.895731	4.27176e-11		6
CELF2	10p14	0.451248	5.88173e-05		6
CERCAM	9q34.11	-0.561217	4.5686e-10		6
CHEK2	22q12.1	0.907676	4.44166e-37		6
CIRBP	19p13.3	-1.06413	4.88312e-47		6
CKAP2	13q14.3	0.68693	3.7807e-17		6
CLCN7	16p13.3	-0.357812	4.41461e-09		6
CLDN6	16p13.3	2.65219	6.23667e-48		6
CLN3	16p12.1	-0.52373	7.03995e-13		6
COL11A2	6p21.32	2.45237	2.36117e-46		6
COL4A3	2q36.3	1.52075	2.96182e-23		6
CPSF3	2p25.1	0.503666	6.08858e-28		6
CREBRF	5q35.1	-0.66551	2.09733e-22		6
CTNNAL1	9q31.3	0.182894	0.0276307		6
CXorf65	Xq13.1	0.50393	0.000792982		6
DDR1	6p21.33	-0.32985	4.70361e-06		6
DIS3	13q21.33	0.143619	0.00916807		6
DPY19L3	19q13.11	-0.529327	4.44324e-17		6
EBF2	8p21.2	-0.840562	9.95318e-13		6
ECEL1	2q37.1	1.94261	2.27264e-22		6
ECM2	9q22.31	-0.919403	3.73157e-14		6
EDN1	6p24.1	1.02133	1.26237e-11		6
EFCAB13	17q21.32	-0.47898	6.11545e-06		6
EGF	4q25	-1.00571	3.65197e-06		6
EIF2AK3	2p11.2	-0.157785	0.0122749		6
ERC2	3p14.3	1.11513	3.35617e-13		6
EXOC7	17q25.1	-0.173541	0.00159135		6
EXTL3	8p21.1	0.575717	2.73794e-18		6
EYA4	6q23.2	-0.792862	0.000359032		6
FAM115C	-	0.424679	0.000130823		6
FAM13A	4q22.1	0.470987	1.03898e-07		6
FBXL2	3p22.3	-0.581361	2.78235e-15		6
FBXL5	4p15.32	-0.835234	5.40209e-52		6
FBXO33	14q21.1	0.140042	0.0118556		6
FBXO34	14q22.3	-0.111562	0.0164869		6
FOXJ2	12p13.31	0.131688	0.00495277		6
FRMPD3	Xq22.3	-1.21917	2.53746e-09		6
GALNT10	5q33.2	-1.40442	9.3344e-54		6
GALNT12	9q22.33	0.971131	1.45854e-13		6
GBP5	1p22.2	1.65136	2.34284e-19		6
GFM2	5q13.3	-0.571627	2.95035e-27		6
GLE1	9q34.11	-0.27554	1.09371e-08		6
GLG1	16q23.1	0.462713	7.4779e-19		6
GLI1	12q13.3	-0.566428	0.000353653		6
GLS	2q32.2	1.06194	1.49827e-41		6
GMIP	19p13.11	0.308834	1.30716e-06		6
GNB3	12p13.31	0.597257	2.72112e-06		6
GOLGA2	9q34.11	-0.352389	1.06441e-14		6
GPR84	12q13.13	1.16722	3.09601e-19		6
GREM2	1q43	-1.28141	6.99358e-11		6
GRM6	5q35.3	1.65489	1.40971e-34		6
HLA-DQB1	6p21.32	0.503667	0.00019962		6
HPX	11p15.4	-3.2931	7.0112e-53		6
HSD17B7P2	10p11.1	-0.831633	6.60854e-14		6
HSPA5	9q33.3	0.213573	0.000890772		6
IGHA1	14q32.33	0.685358	0.0142872		6
IGKV3D-20	2p11.2	0.821046	0.00273705		6
IL12RB1	19p13.11	0.825572	2.74225e-11		6
IL32	16p13.3	1.30932	3.00209e-23		6
INPP4A	2q11.2	0.265379	5.39503e-09		6
IQCA1	2q37.2-q37.3	-0.541111	0.00191163		6
IQUB	7q31.32	-1.84733	3.58513e-31		6
IRS1	2q36.3	-1.48442	1.87563e-31		6
ISLR2	15q24.1	-0.835815	3.33399e-12		6
ITGA2	5q11.2	-0.627007	2.57367e-06		6
KBTBD8	3p14.1	0.739618	1.99452e-11		6
KCNH2	7q36.1	0.771155	0.000247264		6
KCNH4	17q21.2	0.347554	0.00551806		6
KIAA0226L	-	1.21547	7.54709e-32		6
KIF1C	17p13.2	0.445392	1.04782e-11		6
KRT83	12q13.13	3.13286	1.52625e-50		6
LCTL	15q22.31	1.27182	7.74256e-36		6
LINGO1	15q24.3	-0.414325	0.0237171		6
LLGL2	17q25.1	-0.290623	0.00106737		6
LMBR1L	12q13.12	-0.152854	0.00396701		6
LPO	17q22	2.98497	5.84221e-67		6
LRCH3	3q29	0.173492	1.18469e-05		6
LRGUK	7q33	-1.09911	4.28551e-18		6
LRRC23	12p13.31	-0.558006	3.30602e-12		6
LSG1	3q29	0.236273	6.64121e-08		6
LYN	8q12.1	1.30629	2.24793e-47		6
MAB21L1	13q13.3	-1.32473	1.58538e-16		6
MAEL	1q24.1	0.445883	0.0287483		6
MAP7D2	Xp22.12	2.2754	5.41321e-28		6
MC1R	16q24.3	0.225231	0.0234396		6
MED25	19q13.3	-0.144425	0.0240263		6
MEPCE	7q22.1	0.126319	0.0164691		6
METTL2B	7q32.1	0.191937	7.17385e-05		6
MMP9	20q13.12	1.22676	2.80472e-09		6
MRPS27	5q13.2	-0.51417	7.3588e-31		6
MSH2	2p21-p16.3	0.771251	6.85662e-38		6
NEK8	17q11.1	-0.676409	1.09411e-18		6
NFATC1	18q23	0.421495	4.49474e-06		6
NHSL1	6q24.1	1.27457	8.19645e-42		6
NOD1	7p14.3	0.263603	2.22314e-05		6
NOX4	11q14.3	-0.635694	5.61207e-08		6
NPHS1	19q13.12	0.421177	0.0374508		6
NTN4	12q22	-1.86896	3.47396e-23		6
NUMB	14q24.3	-0.0972736	0.03861		6
OR13J1	9p13.3	-0.374757	0.0239925		6
OR7C1	19p13.1	0.683676	3.12587e-06		6
PABPC4L	4q28.3	1.19642	1.02589e-26		6
PALM2	9q31.3	1.81127	8.00727e-37		6
PARK2	-	-0.448373	0.000166807		6
PBX2P1	3q24	0.399962	4.30414e-05		6
PCDHB13	5q31.3	-0.753371	1.30754e-08		6
PDE11A	2q31.2	-1.64138	4.64613e-25		6
PDE9A	21q22.3	1.87822	2.58132e-50		6
PIK3C2A	11p15.1	-0.319361	2.13148e-05		6
PIP4K2C	12q13.3	-0.415243	3.93763e-12		6
PIP5K1C	19p13.3	-0.17615	0.000249087		6
PLA2G4F	15q15.1	-2.74118	4.31638e-56		6
PLIN1	15q26.1	-1.83042	6.80591e-12		6
POTEI	2q21.1	-3.17469	8.16973e-48		6
PPARGC1A	4p15.2	1.24441	2.1219e-11		6
PPAT	4q12	0.419767	4.80294e-09		6
PPP1R1A	12q13.2	0.948886	9.9711e-05		6
PPP2R5C	14q32.31	0.103859	0.00755807		6
PPP5C	19q13.32	0.153126	0.000512457		6
PPP6R3	11q13	-0.211341	0.0002585		6
PREB	2p23.3	0.32025	1.2569e-11		6
PRKAA1	5p13.1	0.287211	0.000463992		6
PRKAR1A	17q24.2	-0.405501	2.95216e-11		6
PRKCD	3p21.1	-0.693354	4.135e-23		6
PRKX	Xp22.33	1.88262	6.40027e-69		6
PRMT2	21q22.3	0.458066	1.98469e-24		6
PRMT8	12p13.32	-0.805166	2.78029e-05		6
PTPRK	6q22.33	0.859206	6.99508e-14		6
RAPGEF4	2q31.1	-0.724676	1.11875e-11		6
RASEF	9q21.32	-1.90641	2.89623e-56		6
RMDN2	2p22.2	-0.34695	3.57628e-06		6
RNF103	2p11.2	-0.845636	1.59222e-54		6
RNLS	10q23.31	-0.245661	0.0112845		6
RPS6KB2	11q13.2	0.337586	9.03051e-06		6
SART1	11q13.1	0.438627	1.23861e-07		6
SCIN	7p21.3	-0.955687	3.00623e-07		6
SEC24D	4q26	-0.350477	1.47551e-05		6
SEC31B	10q24.31	-0.26439	0.0278215		6
SEMA6D	15q21.1	-0.962701	3.85306e-10		6
SFMBT1	3p21.1	-0.24999	9.3616e-05		6
SGK2	20q13.12	-0.773319	2.80351e-06		6
SHISA4	1q32.1	-0.790299	1.56709e-19		6
SLC15A1	13q32.2-q32.3	4.16826	9.98054e-70		6
SLC26A3	7q22.3-q31.1	-3.22164	8.34265e-38		6
SLC36A1	5q33.1	0.317737	7.41785e-05		6
SLC38A7	16q21	0.231952	4.75837e-05		6
SLC39A6	18q12.2	-2.77504	1.0803e-65		6
SLC45A2	5p13.2	-0.621376	2.14458e-06		6
SLCO1A2	12p12.1	1.77313	1.80643e-15		6
SLCO3A1	15q26.1	0.383285	0.000606879		6
SLFN12L	17q12	0.746874	1.05326e-06		6
SLMAP	3p14.3	-0.385403	5.47355e-10		6
SMARCAL1	2q35	0.119766	0.000356121		6
SNRK	3p22.1	-0.335321	4.50881e-10		6
SOX6	11p15.3	2.49875	1.10533e-47		6
SRC	20q11.23	0.567793	6.76124e-15		6
ST5	11p15	0.341924	2.88244e-05		6
STAT5B	17q21.2	-0.171694	0.0101537		6
SYTL3	6q25.3	0.369553	6.03068e-06		6
SYTL5	Xp11.4	-4.69631	1.73239e-78		6
TACR1	2p12	0.822092	7.97726e-05		6
TAF4B	18q11.1	1.66497	2.38456e-46		6
TAOK1	17q11.2	-0.388636	9.42252e-07		6
TAS2R3	7q34	-0.49089	0.000885185		6
TASP1	20p12.1	-0.123985	0.0119504		6
TBC1D5	3p24.3	-0.124898	0.0379006		6
TCP11	6p21.31	1.13106	2.4097e-11		6
TENC1	-	-1.04636	9.25965e-42		6
TES	7q31.2	0.967706	3.73746e-28		6
TGM5	15q15.2	2.45235	1.01253e-28		6
THSD4	15q23	-3.68962	3.57506e-111		6
TMCO3	13q34	-0.510382	1.70103e-11		6
TMEM63C	14q24.3	-2.78781	8.47149e-68		6
TNKS	8p23.1	-0.150809	0.0336747		6
TRIM66	11p15.4	-0.896076	2.72051e-26		6
TSC1	9q34	-0.326608	1.3512e-10		6
TTC21B	2q24.3	-0.150613	0.0387963		6
TTC7A	2p21	1.04496	2.27254e-54		6
TUB	11p15.4	0.781088	4.53693e-09		6
UGT2B4	4q13.3	-1.76113	9.65062e-10		6
ULBP2	6q25.1	1.87969	5.95862e-36		6
UMOD	16p12.3	-2.65808	9.88817e-35		6
USP47	11p15.3	-0.330484	4.80895e-13		6
USP7	16p13.2	-0.243867	7.10402e-08		6
UXS1	2q12.2	0.51118	1.13182e-25		6
VEZT	12q22	-0.547475	1.08339e-23		6
WNK2	9q22.31	0.55457	5.87689e-05		6
WWP1	8q21.3	-1.57846	4.9961e-55		6
XRCC4	5q14.2	-0.183385	0.000168532		6
YME1L1	10p12.1	0.166541	0.000703245		6
ZBTB49	4p16.3	-0.154062	0.000909888		6
ZMYND10	3p21.31	-3.18691	1.06618e-87		6
ZNF180	19q13.2	-0.168807	0.00146396		6
ZNF268	12q24.33	-0.159579	0.0390448		6
ZNF330	4q31.21	-0.0926774	0.0200175		6
ZNF362	1p35.1	0.391485	3.03253e-15		6
ZNF492	19p13.11	1.58835	2.59096e-14		6
ZNF521	18q11.2	0.95765	2.34994e-13		6
ZNF548	19q13.43	-0.413514	6.92784e-12		6
ZNF586	19q13.43	-0.616371	2.74502e-21		6
ZNF606	19q13.43	-0.560176	8.81539e-13		6
ZNF778	16q24.3	0.571979	2.38777e-15		6
ZNF791	19p13.13	-0.143688	0.00137776		6
ZNF808	19q13.41	-0.310478	5.243e-08		6
ZNRF3	22q12.1	-0.309863	0.0332139		6
ABCD1	Xq28	0.634765	6.78328e-14		5
ABTB2	11p13	1.86036	5.41038e-49		5
ACKR3	2q37.3	-0.737222	1.19893e-11		5
ACOT4	14q24.3	-1.71777	7.10021e-55		5
ACRBP	12p13.31	-0.17241	0.0461543		5
ACSL5	10q25.2	0.529611	5.38165e-06		5
ACTR2	2p14	0.336306	2.60038e-11		5
ADAMTS4	1q23.3	0.711869	1.30818e-09		5
ADCYAP1R1	7p14.3	-0.462078	0.00313675		5
AGBL5	2p23.3	0.53649	5.45741e-22		5
AGGF1	5q13.3	-0.623566	5.96755e-43		5
AJAP1	1p36.32	-0.379416	0.0113995		5
ALDH3B2	11q13.2	-1.66531	3.80389e-13		5
ANGPTL3	1p31.3	0.317346	0.0278791		5
ANKRD40	17q21.33	-0.353501	4.59548e-08		5
ANXA11	10q22.3	-0.196295	0.000573605		5
ANXA6	5q33.1	-0.603934	1.17658e-18		5
AP5Z1	7p22.1	0.149579	0.0304008		5
APEH	3p21.31	-0.574107	7.96658e-21		5
ARHGAP20	11q22.3-q23.1	-0.693957	1.59724e-07		5
ARHGEF10	8p23.3	0.303927	6.46398e-05		5
ARHGEF39	9p13.3	0.937666	3.47941e-23		5
ASPA	17p13.2	-0.965396	1.407e-11		5
ATF3	1q32.3	0.523331	0.000771487		5
ATF4	22q13.1	0.616433	3.17726e-23		5
ATG14	14q22.3	-0.414953	3.19751e-19		5
ATG16L2	11q13.4	-0.589963	9.91693e-09		5
ATP8B4	15q21.2	0.227303	0.0250057		5
AURKA	20q13.2	1.20223	2.47384e-23		5
AXIN2	17q24.1	-1.0579	7.28833e-26		5
BANP	16q24.2	0.444772	4.95373e-18		5
BCL6B	17p13.1	-0.304849	0.000227808		5
BDKRB2	14q32.2	-0.750596	1.23769e-13		5
BRD3	9q34.2	-0.421647	5.44611e-12		5
BRD7	16q12.1	0.421202	2.97301e-17		5
BRDT	1p22.1	-1.57672	2.70958e-12		5
BTRC	10q24.32	-0.927506	3.11374e-35		5
C11orf84	-	0.767044	3.72692e-28		5
C16orf70	16q22.1	-0.192371	0.000795224		5
C1orf112	1q24.2	0.655609	1.13962e-19		5
C20orf194	20p13	-0.207566	0.00143549		5
C7orf31	7p15.3	0.672651	1.22141e-11		5
C9orf72	9p21.2	0.197993	0.00761646		5
CACNB2	10p12	-0.36795	0.0124661		5
CACNB3	12q13.12	-0.254092	0.00278194		5
CALHM2	10q24.33	-0.34958	9.78787e-08		5
CAPN8	1q41	-4.67844	1.49361e-75		5
CCDC125	5q13.2	-1.56491	1.24725e-91		5
CCDC30	1p34.2	-1.23559	3.68173e-46		5
CCDC78	16p13.3	-1.66484	6.84033e-24		5
CCND3	6p21.1	0.300064	5.14319e-07		5
CCNF	16p13.3	0.416762	2.27739e-07		5
CD101	1p13.1	0.575874	9.47926e-11		5
CD200R1	3q13.2	0.39594	0.00257995		5
CD244	1q23.3	0.808611	2.25503e-09		5
CD2AP	6p12.3	-0.21709	0.00159025		5
CDC14A	1p21.2	-0.531421	0.000135043		5
CDHR3	7q22.3	-0.757395	6.03751e-06		5
CDKAL1	6p22.3	0.782189	2.49554e-45		5
CDKL1	14q21.3	0.544766	2.70142e-08		5
CDO1	5q22.3	-0.48703	0.00773637		5
CDS2	20p12.3	-0.425101	9.31937e-14		5
CELF1	11p11.2	0.0959052	0.00782525		5
CEP85L	6q22.31	0.721651	6.07565e-14		5
CHML	1q43	0.66777	2.18583e-11		5
CHRD	3q27.1	-2.48662	8.91316e-47		5
CHST2	3q24	1.61541	3.38993e-52		5
CMTR1	6p21.2	0.0928125	0.0372305		5
CNOT2	12q15	-0.206254	8.18627e-06		5
CNTFR	9p13.3	0.737201	0.00465891		5
COLEC12	18p11.32	-0.838439	3.81371e-09		5
CORO1C	12q24.11	0.761221	2.16143e-36		5
CPT2	1p32.3	-0.207295	6.68366e-05		5
CSF1R	5q32	0.272997	0.00927448		5
CTNNB1	3p22.1	0.197015	0.00128378		5
CXorf36	Xp11.3	-0.4339	2.7119e-06		5
CYP21A2	6p21.33	-2.87964	3.72295e-45		5
DAB1	1p32.2	-0.516566	0.00768916		5
DAZAP1	19p13.3	0.473806	4.52573e-25		5
DBR1	3q22.3	0.181308	1.16621e-05		5
DCAF5	14q24.1	-0.512325	6.62278e-29		5
DCAF8	1q23.2	-0.258034	1.59431e-07		5
DDX23	12q13.12	-0.163352	0.000200607		5
DEPDC1	1p31.3	1.6487	8.56778e-34		5
DET1	15q26.1	-0.17613	0.00159836		5
DHCR24	1p32.3	-1.23287	1.97556e-31		5
DHRS7	14q23.1	-0.459193	1.941e-10		5
DNAJB4	1p31.1	0.262503	0.000337251		5
DNAJC16	1p36.21	-0.518876	1.5477e-21		5
DPAGT1	11q23.3	0.147643	0.0145908		5
DRD2	11q23.2	1.11603	1.4135e-07		5
DSG1	18q12.1	2.67905	3.00965e-20		5
DTX3L	3q21.1	-0.157375	0.0290896		5
DYRK2	12q15	0.320504	3.14109e-06		5
E2F1	20q11.22	1.10108	2.78581e-19		5
EARS2	16p12.2	-0.471475	8.78411e-17		5
ECHDC1	6q22.33	0.668231	1.46142e-13		5
EDAR	2q13	2.01911	3.09679e-24		5
EFCAB7	1p31.3	-0.269341	1.19145e-05		5
EHD2	19q13.33	-0.572784	5.0408e-10		5
ELAVL1	19p13.2	0.351642	8.04759e-26		5
EML1	14q32.2	-0.24207	0.00968458		5
EPHA2	1p36.13	0.909132	1.82738e-22		5
EPHX2	8p21.2-p21.1	-0.887587	2.05791e-12		5
ERG	21q22.2	-0.456395	6.97279e-07		5
EVC	4p16.2	-0.440574	7.70809e-05		5
FAM129A	1q25.3	-0.439391	0.00284286		5
FAM49A	2p24.2	1.06315	1.63854e-29		5
FAM63A	-	-1.30022	7.86897e-53		5
FAM73A	-	-0.635586	8.9156e-17		5
FANK1	10q26.2	-1.39725	4.00422e-28		5
FBXO15	18q22.3	-1.82321	9.66891e-39		5
FBXO30	6q24.3	0.215023	0.00327174		5
FCRL4	1q23.1	0.435883	0.0104126		5
FIP1L1	4q12	0.163512	1.19477e-05		5
G6PD	Xq28	0.212858	0.0121924		5
GABRG3	15q12	2.06266	6.80716e-21		5
GAK	4p16.3	-0.4435	5.36247e-15		5
GALNT6	12q13.13	-2.21585	4.11822e-45		5
GALNT7	4q34.1	-1.67952	4.19128e-51		5
GAS8	16q24.3	-0.159392	0.0223344		5
GCKR	2p23.3	0.37769	0.00287783		5
GFM1	3q25.32	-0.134678	0.0145848		5
GNAO1	16q13	-0.423502	0.0219562		5
GNS	12q14.3	-0.431021	3.03253e-13		5
GPC3	Xq26.2	-0.957857	8.4876e-07		5
GPHN	14q23.3	-0.41975	6.31861e-06		5
GPLD1	6p22.3	0.621559	1.76296e-06		5
GPR114	-	0.713219	1.88742e-05		5
GPR124	-	-0.343977	0.000915		5
GPR141	7p14.1	-0.35652	0.0163567		5
GPR61	1p13.3	0.332094	0.00240541		5
GPR83	11q21	0.729897	6.0049e-06		5
GRIK4	11q23.3	-2.08489	3.16367e-32		5
GRIK5	19q13.2	-0.89559	3.11505e-11		5
GRM2	3p21.2	0.787089	3.20068e-11		5
GSK3A	19q13.2	0.175659	0.000417644		5
GSN	9q33.2	0.210288	0.0175492		5
GTPBP4	10p15.3	0.954838	4.62246e-55		5
GUSBP11	22q11.23	0.203598	0.0307174		5
GVINP1	11p15.4	0.503009	0.00143526		5
HABP4	9q22.32	0.483338	2.16354e-11		5
HACL1	3p25.1	-0.288867	3.09212e-08		5
HADHA	2p23.3	0.0877856	0.0355829		5
HAUS8	19p13.11	0.810139	1.32633e-32		5
HEATR3	16q12.1	0.355362	3.48413e-09		5
HEATR6	17q23.1	-0.413195	1.64797e-07		5
HEPACAM2	7q21.2	-3.30185	1.59434e-31		5
HHAT	1q32.2	-1.41976	2.37468e-57		5
HID1	17q25.1	-2.06885	3.81612e-71		5
HIRIP3	16p11.2	-0.42495	2.23199e-07		5
HIST2H2BE	1q21.2	-0.993887	8.45145e-13		5
HOXA3	7p15.2	0.926622	1.05961e-09		5
HSDL2	9q32	-0.827065	5.0424e-33		5
IBSP	4q22.1	0.542589	0.0236922		5
ICA1L	2q33.2	-0.618505	5.57145e-08		5
IFIH1	2q24.2	0.634542	3.09125e-09		5
IFT81	12q24.11	-0.299947	1.59856e-06		5
IGHM	14q32.33	1.38811	2.81855e-06		5
IGHV3-49	14q32.33	1.2198	3.60912e-05		5
IKBKB	8p11.21	-0.895893	5.88345e-30		5
IL1R2	2q11.2	1.98343	3.27621e-34		5
ILK	11p15.4	-0.238011	0.000864519		5
INPP5D	2q37.1	0.376405	0.00015619		5
INTS12	4q24	-0.385463	1.49405e-18		5
INTU	4q28.1	-0.704624	1.42708e-17		5
IQCD	12q24.13	-1.17759	5.65384e-41		5
IQCH	15q23	-1.24216	4.2346e-46		5
JADE1	4q28.2	-0.209253	0.000783254		5
JMJD8	16p13.3	-0.595809	1.59018e-20		5
KCNA7	19q13.33	0.753382	8.90311e-11		5
KCNAB2	1p36.31	0.533211	2.83356e-09		5
KCNN2	5q22.3	-0.359546	0.000536502		5
KCNS3	2p24.2	-0.697659	3.04846e-09		5
KIAA1045	-	2.04702	4.3503e-34		5
KIAA1524	-	1.10004	4.38354e-25		5
KIF11	10q23.33	0.947219	2.56207e-20		5
KIF3B	20q11.21	-0.554015	3.90221e-22		5
KLC3	19q13.32	0.568082	2.6915e-05		5
KLF11	2p25.1	0.6768	5.60869e-21		5
KLHL34	Xp22.12	2.79207	3.18587e-57		5
KLK5	19q13.41	3.29706	3.84147e-22		5
KRT18	12q13.13	-1.66198	1.67664e-52		5
KRT32	17q21.2	-1.54028	6.5421e-13		5
KRT5	12q13.13	2.52562	9.65707e-13		5
KSR1	17q11.2	0.379104	6.55168e-05		5
LAS1L	Xq12	0.177529	0.000304509		5
LATS1	6q25.1	-0.25902	0.000173611		5
LDB3	10q23.2	-0.526919	1.51959e-06		5
LLGL1	17p11.2	0.298327	8.11808e-07		5
LMNB2	19p13.3	1.01721	6.87588e-44		5
LMTK3	19q13.33	-1.41013	6.70726e-21		5
LRRC31	3q26.2	-3.75619	2.98087e-29		5
LRRC37A2	17q21.31	-0.674669	3.31844e-13		5
LRRC66	4q12	0.559516	4.59197e-05		5
MAP7	6q23.3	-0.300704	0.000310952		5
MAST3	19p13.11	-0.215671	0.000172449		5
MASTL	10p12.1	0.755617	1.20821e-28		5
MBD3	19p13	0.236486	0.00254894		5
ME3	11q14.2	-0.361196	0.00244153		5
MEPE	4q22.1	-0.532627	0.00488872		5
MEX3C	18q21.2	0.48645	1.36352e-14		5
MGAT4B	5q35.3	0.438613	4.09104e-17		5
MGEA5	10q24.32	-0.440383	3.19938e-23		5
MICALCL	11p15.3	-1.81702	1.80456e-37		5
MMP14	14q11.2	0.268851	0.0215921		5
MSN	Xq12	1.1839	8.05627e-51		5
MTMR9	8p23.1	-0.351372	2.17992e-08		5
MUC15	11p14.3	2.79061	1.51282e-17		5
MYCT1	6q25.2	-0.610543	3.79223e-11		5
NAP1L3	Xq21.32	-0.634059	5.40816e-08		5
NCAM2	21q21.1	-2.96355	9.31561e-51		5
NDC1	1p32.3	0.545051	9.59065e-17		5
NFKBIZ	3q12.3	-0.390625	0.0273048		5
NKAPL	6p22.1	-0.313696	0.00556983		5
NPNT	4q24	-2.61973	5.08157e-57		5
NTM	11q25	-0.950403	4.80198e-17		5
NXN	17p13.3	1.33458	8.76298e-33		5
OLFM4	13q14.3	2.24337	6.15806e-10		5
OMA1	1p32.2-p32.1	-0.298329	7.4589e-08		5
PABPC1L	20q13.12	-0.271614	0.0325534		5
PALD1	10q22.1	0.194101	0.0236859		5
PALLD	4q32.3	-0.227649	0.0130069		5
PARP3	3p21.2	-0.727333	3.11999e-21		5
PAX6	11p13	0.886665	5.37364e-20		5
PBX1	1q23.3	-1.30369	3.27945e-39		5
PCCA	13q32.3	-0.530319	6.31539e-13		5
PCDH12	5q31.3	-0.383623	2.10315e-07		5
PCDHB4	5q31.3	-0.559514	2.95052e-05		5
PCED1A	20p13	-0.390503	1.37026e-07		5
PCGF6	10q24.33	0.476483	1.34677e-21		5
PCK1	20q13.31	-1.1067	0.000217493		5
PDHA1	Xp22.12	0.737056	4.49495e-48		5
PDIA4	7q36.1	0.532511	1.90519e-16		5
PGM2	4p14	0.281126	1.19722e-06		5
PHACTR2	6q24.2	0.32502	0.00017697		5
PIGN	18q21.33	-0.478037	2.34913e-13		5
PITPNC1	17q24.3	0.201866	0.01989		5
PKP2	12p11.21	0.256704	0.0381784		5
PLIN2	9p22.1	1.19913	1.7228e-31		5
PNPT1	2p16.1	0.57298	3.90414e-25		5
POLN	4p16.3	-1.5127	3.96608e-40		5
POLR2J	7q22.1	0.309971	6.79832e-05		5
POLR3E	16p12.2	-0.312087	8.3569e-11		5
POU5F1	6p21.33	2.35764	2.2585e-82		5
PPARG	3p25.2	-0.31212	0.0168194		5
PPFIA4	1q32.1	1.01049	3.847e-09		5
PPM1E	17q24.2	0.469591	0.0162167		5
PPP1R15B	1q32.1	-0.184073	0.000456991		5
PPP1R21	2p16.3	0.210441	2.70732e-09		5
PPP2R4	-	-0.439485	6.22805e-15		5
PRDM11	11p11.2	0.290957	3.61264e-05		5
PRF1	10q22.1	1.28543	6.1479e-17		5
PSMA3	14q23.1	0.16225	0.00491752		5
PTCD1	7q22.1	0.248028	3.3718e-05		5
PWP2	21q22.3	0.776715	0.0007005		5
RAB9B	Xq22.2	0.419677	0.00031119		5
RAD21	8q24.11	0.446484	6.8911e-07		5
RARS	5q34	-0.152632	0.000365127		5
RBM5	3p21.31	-0.454688	3.87506e-18		5
RBMXL1	1p22.2	0.246925	1.05113e-05		5
RGS4	1q23.3	-0.615363	4.48088e-05		5
RHPN2	19q13.12	0.236898	0.0391002		5
RNF145	5q33.3	1.19881	1.40627e-38		5
RNF32	7q36.3	0.251436	0.00267664		5
RNF41	12q13.3	-0.233468	2.70031e-10		5
ROPN1B	3q21.2	4.22227	3.53308e-70		5
RPL4	15q22.31	0.378459	4.01685e-09		5
RPL5	1p22.1	0.495968	8.20532e-14		5
RPP30	10q23.31	0.146891	0.000608004		5
RPS6	9p22.1	0.378539	4.86852e-07		5
RRP1	21q22.3	0.895491	3.27652e-30		5
SAFB	19p13.3	0.245291	3.55465e-08		5
SCAF11	12q12	-0.289009	2.1223e-07		5
SCML2	Xp22.13	1.4679	5.12262e-24		5
SCML4	6q21	0.55069	0.00367987		5
SEC61A1	3q21.3	0.39686	6.40795e-16		5
SECISBP2L	15q21.1	-0.256811	0.000845443		5
2019-09-12	16p13.3	-1.35017	8.01792e-17		5
SGCG	13q12.12	-1.20049	4.91909e-08		5
SHANK3	22q13.33	0.4064	8.21395e-07		5
SHC4	15q21.1	3.20716	5.20592e-49		5
SIGLEC16	19q13.33	0.261849	0.0376847		5
SIM2	21q22.13	1.26351	1.68853e-11		5
SIRT3	11p15.5	-0.747707	1.01732e-29		5
SIRT7	17q25.3	0.303283	1.23569e-05		5
SIX4	14q23.1	-0.352123	0.00157471		5
SLC16A6	17q24.2	-3.33482	2.65905e-75		5
SLC20A1	2q14.1	-0.195518	0.000477256		5
SLC27A5	19q13.43	-0.238311	0.014702		5
SLC2A3	12p13.31	0.506793	1.66634e-06		5
SLC30A9	4p13	-0.334313	5.00489e-11		5
SLC34A2	4p15.2	3.64299	2.98318e-27		5
SLC35F6	2p23.3	-0.152345	0.00911549		5
SLC5A3	21q22.11	0.240667	0.0134092		5
SLC6A14	Xq23	4.05697	4.01699e-40		5
SLC6A16	19q13.33	1.3747	1.52728e-21		5
SLFN11	17q12	0.639877	1.73983e-10		5
SLFN5	17q12	0.402088	0.000500582		5
SMURF2	17q23.3-q24.1	0.447748	5.47743e-12		5
SMYD3	1q44	-0.399134	2.46715e-05		5
SND1	7q32.1	0.338503	1.2991e-12		5
SORBS3	8p21.3	-0.176358	0.0433338		5
SORT1	1p13.3	0.19427	0.00439032		5
SOX9	17q24.3	1.31471	3.55585e-21		5
SP140	2q37.1	0.702962	1.5575e-07		5
SSBP2	5q14.1	-0.9668	3.42309e-26		5
STAM	10p12.33	0.282325	7.30925e-09		5
STARD3	17q11-q12	-0.518316	2.52828e-07		5
STAT1	2q32.2	0.372783	0.000850737		5
STXBP2	19p13.2	-0.567151	2.39141e-12		5
STXBP5L	3q13.33	0.991574	3.1374e-06		5
SULF2	20q13.12	-0.456399	0.00015094		5
SV2B	15q26.1	0.663057	8.54995e-05		5
SWI5	9q34.11	-0.161143	0.0141567		5
TAF2	8q24.12	0.426236	2.32993e-07		5
TBC1D10C	11q13.2	0.352918	0.00829198		5
TBC1D9	4q31.21	-3.47661	4.53233e-124		5
TCF7	5q31.1	0.727995	1.82607e-09		5
TDRD3	13q21.2	-0.257281	2.411e-07		5
TEAD4	12p13.33	1.04472	4.98315e-32		5
TF	3q22.1	2.11662	4.8294e-18		5
TFDP2	3q23	0.169539	0.00219961		5
THBS2	6q27	-0.436589	0.00269247		5
THOC1	18p11.32	0.30384	5.17692e-08		5
TIE1	1p34.2	-0.400715	9.40461e-06		5
TIMELESS	12q13.3	0.211531	0.00707791		5
TLR10	4p14	0.438788	0.0105535		5
TM7SF3	12p11.23	0.208009	0.00382893		5
TMC4	19q13.42	-1.76125	2.41653e-55		5
TMEM246	9q31.1	-0.27263	0.0179228		5
TMPRSS6	22q12.3	-3.37137	1.33961e-43		5
TMTC1	12p11.22	-0.63508	0.00016018		5
TMTC3	12q21.32	-0.412485	2.35171e-09		5
TNFRSF21	6p12.3	1.56075	8.14299e-45		5
TNIP3	4q27	1.88768	1.81561e-27		5
TOX2	20q13.12	0.76538	1.34158e-09		5
TPCN1	12q24.13	-0.732269	5.94461e-37		5
TRAM1L1	4q26	-0.785058	6.57408e-16		5
TRIM50	7q11.23	0.697065	3.4382e-07		5
TRMT1	19p13.13	0.46573	2.5354e-10		5
TSG101	11p15.1	-0.298476	7.10053e-11		5
TTC23L	5p13.2	-1.55735	1.55e-37		5
TTC4	1p32.3	0.238043	8.72258e-07		5
TTLL1	22q13.2	-0.154214	0.0104775		5
TTLL2	6q27	1.87017	2.61723e-33		5
UBAP1	9p13.3	0.141648	0.000210734		5
UGT8	4q26	4.29489	5.03983e-79		5
UMPS	3q21.2	0.256942	1.75462e-09		5
USP19	3p21.31	-0.308296	3.31313e-12		5
VAV2	9q34.2	-0.184591	0.00226563		5
VCP	9p13.3	0.153913	0.00139755		5
VPS8	3q27.2	-0.264232	1.74258e-08		5
VRK3	19q13.33	-0.302927	6.1689e-11		5
VSIG4	Xq12	0.421951	0.000718205		5
VWA5B1	1p36.12	-0.883189	2.6772e-08		5
WDR24	16p13.3	-0.524107	3.66293e-13		5
WDR26	1q42.11-q42.12	-0.26028	4.0567e-07		5
WDR4	21q22.3	0.796388	3.00848e-36		5
WDR62	19q13.12	0.967667	2.79178e-20		5
WIPI1	17q24.2	-0.214722	0.00578718		5
WISP1	8q24.22	-0.565334	6.55974e-05		5
WNK4	17q21.2	-3.68793	6.77139e-48		5
WTAP	6q25.3	0.349771	1.12159e-16		5
XRRA1	11q13.4	-0.583697	2.17154e-10		5
ZBTB10	8q21.13	0.26791	0.0244178		5
ZBTB14	18p11.31	-0.0807487	0.0456464		5
ZBTB16	11q23.2	-2.36701	1.52988e-22		5
ZBTB24	6q21	0.259968	6.39563e-06		5
ZBTB43	9q33.3	-0.212204	9.2138e-05		5
ZBTB7C	18q21.1	-1.26456	3.14773e-13		5
ZC3H14	14q31.3	-0.155141	0.00203331		5
ZC3H15	2q32.1	0.317021	7.44544e-15		5
ZCCHC12	Xq24	0.344363	0.010426		5
ZCCHC5	-	-0.49768	0.000146377		5
ZDHHC5	11q12.1	0.163731	0.00033923		5
ZFHX2	14q11.2	-0.520824	5.20734e-09		5
ZFP37	9q32	0.346107	0.00280651		5
ZFP62	5q35.3	-0.370357	2.90082e-12		5
ZHX3	20q12	-0.386022	7.41132e-10		5
ZKSCAN2	16p12.1	-0.442432	6.72045e-12		5
ZNF20	19p13.2	-0.733213	2.2084e-25		5
ZNF239	10q11.22-q11.23	-0.224415	0.00999342		5
ZNF252P	8q24.3	-0.151204	0.0455176		5
ZNF275	Xq28	0.13759	0.0457431		5
ZNF286A	17p12	0.861014	8.03262e-34		5
ZNF350	19q13.41	-0.616086	5.12002e-17		5
ZNF440	19p13.2	-0.404263	1.62169e-09		5
ZNF555	19p13.3	-0.348793	7.49373e-09		5
ZNF577	19q13.41	-0.272613	0.00795659		5
ZNF589	3p21.31	-0.25019	3.09951e-06		5
ZNF616	19q13.41	-0.119256	0.0420638		5
ZNF629	16p11.2	-0.476888	2.45135e-18		5
ZNF701	19q13.41	-0.48357	7.64032e-15		5
ZNF749	19q13.43	-0.198416	0.00937827		5
ZNF835	19q13.43	-0.906308	7.27419e-09		5
ZXDB	Xp11.21	-0.549374	4.62966e-15		5
AASS	7q31.32	-0.379374	0.00107239		4
ABCD2	12q12	0.650391	0.00015888		4
ACE2	Xp22.2	3.08012	4.50819e-47		4
ACER3	11q13.5	0.245583	0.00793078		4
ACSM3	16p12.3	0.722908	2.90635e-10		4
ACTG2	2p13.1	1.25416	1.49346e-08		4
ADAM10	15q21.3	-0.137859	0.0196457		4
ADAM20	14q24.2	-0.538815	2.71369e-05		4
ADARB1	21q22.3	0.422012	4.25929e-11		4
ADD3	10q25.1-q25.2	0.365273	0.00103621		4
AEN	15q26.1	0.436984	7.50554e-14		4
AGBL4	1p33	-1.27751	5.13719e-19		4
AGPAT4	6q26	1.08034	8.96125e-26		4
AHCY	20q11.22	0.306643	1.25367e-05		4
AK5	1p31.1	-0.804048	0.000204036		4
AK7	14q32.2	-1.41722	1.16329e-24		4
AMICA1	-	0.520472	0.000358839		4
AMZ2	17q24.2	-0.160904	0.0153495		4
ANGPTL5	11q22.1	-0.478329	0.00253095		4
ANKRD20A11P	21q11.2	-2.25145	6.52259e-25		4
ANKRD52	12q13.3	-0.24878	2.85566e-05		4
AOC1	7q36.1	0.748784	0.000674121		4
AP5B1	11q13.1	0.392829	2.82023e-11		4
APBB1	11p15.4	-0.43756	6.16338e-06		4
APEX1	14q11.2	0.114659	0.0235278		4
APEX2	Xp11.21	0.253445	3.84901e-06		4
ARGLU1	13q33.3	0.236085	0.000591576		4
ARHGAP1	11p11.2	-0.361203	3.31968e-15		4
ARHGEF33	2p22.1	0.477294	5.04107e-06		4
ARPC1B	7q22.1	0.559306	2.11731e-11		4
ATF2	2q31.1	-0.0994816	0.0388511		4
ATP13A2	1p36.13	-0.182504	0.0174161		4
ATP6V1C1	8q22.3	-0.148033	0.0454315		4
ATP9B	18q23	-0.344599	1.09639e-09		4
B4GALT5	20q13.13	0.693893	7.48957e-21		4
BARX2	11q24.3	1.07437	1.64481e-07		4
BBS12	4q27	-0.287756	1.86716e-05		4
BEND5	1p33	-0.260049	0.0340009		4
BIVM	13q33.1	0.552201	3.57084e-10		4
BLOC1S1	12q13.2	-0.258437	0.000759481		4
BLVRA	7p13	-1.0108	1.16364e-27		4
BPIFB1	20q11.21	-4.50087	3.99801e-49		4
BRIX1	5p13.2	0.533646	5.29971e-22		4
BROX	1q41	-0.162559	0.00957684		4
BST1	4p15.32	0.253405	0.00385686		4
BTN2A1	6p22.2	0.427625	4.06266e-20		4
C11orf24	11q13.2	0.375328	6.12999e-10		4
C12orf5	-	0.431814	1.32833e-11		4
C17orf47	17q22	-0.375369	0.00258487		4
C1orf116	1q32.1	1.31993	1.22821e-08		4
C1orf198	1q42.2	0.873612	1.33028e-34		4
C1QTNF3	5p13.2	-1.5331	1.10269e-26		4
C1QTNF6	22q12.3	-0.539453	9.33441e-08		4
C1S	12p13.31	0.596492	1.09316e-05		4
C2	6p21.33	0.508836	1.88195e-05		4
C5orf34	5p12	0.75528	8.40211e-27		4
C6orf165	-	-0.309492	0.00751377		4
C9orf91	-	-0.709142	1.38691e-28		4
CALCR	7q21.3	-1.00863	1.76216e-09		4
CALN1	7q11.22	-0.919943	3.42255e-06		4
CAMK2G	10q22.2	0.191692	3.07706e-05		4
CCDC142	2p13.1	0.12034	0.0372483		4
CCDC159	19p13.2	-1.17692	3.68523e-44		4
CCDC174	3p25.1	-0.111173	0.00485014		4
CCDC34	11p14.1	0.250885	0.0020179		4
CCDC97	19q13.2	-0.104745	0.0173072		4
CCL13	17q12	2.08947	8.8359e-24		4
CCNA2	4q27	1.49478	4.94543e-36		4
CCNB1	5q13.2	0.87103	2.47068e-18		4
CD180	5q12.3	0.935646	4.51641e-18		4
CD1D	1q23.1	0.327818	0.00186367		4
CD300LF	17q25.1	0.3257	0.00189395		4
CD79B	17q23.3	1.33077	4.16904e-15		4
CD99L2	Xq28	-0.2874	1.78967e-05		4
CDC123	10p14-p13	0.898415	2.06151e-60		4
CDC16	13q34	0.166844	0.000768588		4
CDCA4	14q32.33	0.820672	1.18076e-32		4
CDCA7L	7p15.3	1.19841	7.451e-21		4
CDH22	20q13.12	-0.449545	0.0373453		4
CDKN2D	19p13.2	0.521718	4.14326e-09		4
CDYL2	16q23.2	-1.79477	4.3555e-61		4
CELA2B	1p36.21	-0.570207	1.04932e-06		4
CENPO	2p23.3	0.973011	5.5396e-44		4
CES1	16q12.2	-1.02961	8.1638e-08		4
CETP	16q13	0.36337	0.000238123		4
CHN2	7p14.3	-1.59025	1.0152e-35		4
CHRNA6	8p11.21	-1.41862	4.0729e-15		4
CIRH1A	-	0.861605	3.64876e-48		4
CLCN2	3q27.1	0.339395	2.15217e-06		4
CLDN8	21q22.11	0.712708	0.00383989		4
CLIC5	6p21.1	-0.302161	0.018372		4
CLIP4	2p23.2	1.11258	1.23523e-16		4
CLPTM1L	5p15.33	0.318724	8.69118e-10		4
CLYBL	13q32.3	0.206557	0.0181612		4
CMIP	16q23.2-q23.3	0.165522	0.00544442		4
CMTM5	14q11.2	1.56837	5.58379e-16		4
CNDP2	18q22.3	-0.128737	0.0367858		4
COL4A3BP	5q13.3	-0.833423	4.84314e-47		4
COQ6	14q24.3	-0.558313	6.01662e-24		4
CORO2A	9q22.33	-1.10989	1.23255e-27		4
CSF2RB	22q12.3	0.775138	2.08723e-10		4
CSGALNACT1	8p21.3	0.479165	9.74252e-07		4
CTIF	18q21.1	0.155542	0.0372429		4
CXorf23	-	-0.475107	4.28848e-18		4
CYB5R2	11p15.4	1.486	1.33461e-31		4
CYP2C8	10q23.33	-0.636257	0.00194848		4
CYYR1	21q21.3	0.707163	6.88699e-12		4
DACT2	6q27	1.17018	3.71803e-08		4
DCAF10	9p13.2	-0.877684	1.48702e-19		4
DCBLD1	6q22.1	0.759787	1.46371e-23		4
DCBLD2	3q12.1	0.669175	3.82769e-16		4
DCSTAMP	8q22.3	0.394796	0.0200763		4
DCT	13q32.1	0.834348	1.28856e-05		4
DCUN1D3	16p12.3	-0.315351	1.10636e-09		4
DDC	7p12.2-p12.1	2.4022	8.85126e-28		4
DDX49	19p13.11	0.489565	8.91281e-14		4
DDX60	4q32.3	-0.472178	0.00015436		4
DEPDC7	11p13	1.20857	9.03957e-27		4
DFNB31	-	-0.300879	0.000868509		4
DHX16	6p21.33	0.292134	1.01266e-11		4
DIO2	14q31.1	-0.366737	0.0331302		4
DLG3	Xq13.1	-0.383189	1.6026e-12		4
DLGAP3	1p34.3	0.987881	8.62432e-10		4
DNAJC2	7q22.1	0.697054	2.42226e-49		4
DNPEP	2q35	-0.305591	4.98686e-08		4
DOK3	5q35.3	0.465408	1.39501e-08		4
DOK5	20q13.2	1.16015	2.72121e-21		4
DSG2	18q12.1	0.607697	2.65545e-09		4
DTX4	11q12.1	0.987137	4.07335e-15		4
DUOXA2	15q21.1	0.830057	5.89449e-08		4
DUS3L	19p13.3	0.313851	2.51878e-05		4
EBF3	10q26.3	-0.524072	1.88183e-05		4
EBF4	20p13	-1.38364	4.71705e-26		4
ECT2	3q26.31	0.539406	3.59669e-09		4
EFCC1	3q21.3	-2.62601	1.20439e-53		4
EFNA3	1q21.3	0.548462	0.00010911		4
EFTUD1	-	-0.117138	0.0127796		4
EHD4	15q15.1	-0.203391	1.57831e-05		4
EIF2B3	1p34.1	0.362227	6.98793e-16		4
EIF3B	7p22.3	0.54437	4.56822e-22		4
EIF3D	22q12.3	0.346558	5.12722e-11		4
ELK3	12q23.1	-0.253605	7.411e-05		4
ELOVL4	6q14.1	1.36001	7.14799e-22		4
EPOR	19p13.2	-0.948087	1.69332e-29		4
EPT1	-	0.181965	0.0119705		4
ERAP1	5q15	-0.419583	2.68259e-08		4
ETNK2	1q32.1	-1.60628	2.40377e-31		4
EZH1	17q21.2	-0.542849	4.59218e-22		4
F11R	1q23.3	0.471193	7.2395e-13		4
FAH	15q25.1	-1.06709	3.94642e-31		4
FAHD2A	2q11.1	0.890485	2.28376e-52		4
FAIM3	-	-0.397158	0.00420966		4
FAM114A1	4p14	-0.349205	5.45034e-09		4
FAM153C	5q35.3	-1.37993	6.52898e-22		4
FAM160B2	8p21.3	-0.173997	0.0166934		4
FAM161A	2p15	0.391643	9.17766e-06		4
FAM20A	17q24.2	1.11665	6.68484e-21		4
FAM58A	-	0.820718	1.17783e-35		4
FARS2	6p25.1	-0.142772	0.00358986		4
FBXL19	16p11.2	0.330679	2.98515e-06		4
FBXO43	8q22.2	0.605306	1.07867e-07		4
FBXW8	12q24.22	-0.388547	1.23499e-12		4
FCAMR	1q32.1	1.47308	1.48147e-13		4
FCER1A	1q23.2	-0.934813	1.12094e-06		4
FGFR3	4p16.3	-1.46746	3.12283e-13		4
FHL5	6q16.1	-1.12639	1.91187e-14		4
FKBP10	17q21.2	-0.292945	0.00221135		4
FLRT3	20p12.1	-2.08451	3.15404e-20		4
FPGS	9q34.11	-0.164314	0.0143557		4
FZD9	7q11.23	4.00769	4.4427e-96		4
GAB1	4q31.21	-0.639274	1.66337e-17		4
GATAD2A	19p13.11	0.559385	7.63348e-39		4
GEMIN2	14q21.1	0.210271	4.32617e-05		4
GEMIN4	17p13.3	0.468654	2.31061e-17		4
GHR	5p13.1-p12	-1.33456	1.6018e-20		4
GLRA4	Xq22.2	-0.35419	0.0190843		4
GNPTG	16p13.3	-0.483904	2.21532e-12		4
GPD1	12q13.12	-0.919312	0.000716193		4
GPR12	13q12.13	3.6024	1.0999e-46		4
GPR143	Xp22.2	-0.322514	0.0402281		4
GPRIN1	5q35.2	0.805547	3.62891e-12		4
GPT2	16q11.2	1.42649	9.53941e-36		4
GRAMD1C	3q13.31	-0.86663	1.75681e-19		4
GRB10	7p12.1	0.438748	1.6776e-08		4
GRINA	8q24.3	-0.266296	0.00117071		4
GRM7	3p26.1	-0.869007	6.1362e-06		4
GTF3C3	2q33.1	0.177351	0.000216348		4
GYLTL1B	-	1.63159	6.83276e-30		4
H2AFZ	4q23	0.668092	2.83749e-20		4
HAND2	4q34.1	0.370091	0.00829198		4
HARS	5q31.3	-0.158176	0.000346061		4
HAS1	19q13.41	0.568584	0.00662998		4
HDAC11	3p25.1	-1.03436	3.3439e-27		4
HDAC8	Xq13.1	0.125524	0.00485677		4
HDDC2	6q22.31	0.604848	6.67576e-24		4
HEYL	1p34.2	-0.484978	6.01866e-07		4
HIST1H2AI	6p22.1	-0.800323	0.000525411		4
HLA-DQB2	6p21.32	0.399876	0.0253171		4
HLA-V	6p22.1	0.848903	2.20586e-06		4
HMGB3	Xq28	1.01933	2.83273e-17		4
HMGCS2	1p12	-4.69067	1.89471e-31		4
HNRNPM	19p13.2	0.188902	3.18623e-06		4
HOXA11	7p15.2	0.630982	0.000190972		4
HPD	12q24.31	-0.333534	0.0148604		4
HPS6	10q24.32	-0.200488	0.000225506		4
HRH2	5q35.2	0.320401	0.0310581		4
HSD17B10	Xp11.22	0.288541	6.09631e-05		4
HSD17B2	16q23.3	2.2168	1.12474e-18		4
HSF1	8q24.3	0.475485	1.29998e-10		4
HTR1F	3p12	-0.956726	3.3292e-12		4
ICOS	2q33.2	1.35473	3.66293e-12		4
IGKV1D-16	2p11.2	0.751885	0.00367864		4
IGSF5	21q22.2	-0.442014	0.0272378		4
IK	5q31.3	-0.348342	1.34459e-17		4
IL12RB2	1p31.3	3.51833	4.1458e-72		4
IL22RA1	1p36.11	0.835542	1.14235e-06		4
IL31RA	5q11.2	0.962582	5.4414e-11		4
IL6	7p15.3	1.1838	3.06934e-08		4
IL7R	5p13.2	0.904608	1.31909e-06		4
IMMT	2p11.2	0.206893	3.83777e-07		4
IQCC	1p35.2	-0.305713	2.62504e-06		4
IRF9	14q12	-0.29003	0.00723303		4
ISG20L2	1q23.1	0.350363	8.07012e-14		4
ISLR	15q24.1	-0.373106	0.00423685		4
ITGA6	2q31.1	0.984313	3.04666e-18		4
ITGBL1	13q33.1	-1.24336	6.80637e-17		4
IYD	6q25.1	-2.12531	3.20077e-14		4
JRK	8q24.3	0.542056	3.18828e-10		4
KCNA3	1p13.3	0.614486	0.00052632		4
KCNIP4	4p15.31-p15.2	-0.435334	1.10369e-07		4
KCNJ10	1q23.2	0.959065	8.02043e-10		4
KCNK5	6p21.2	2.90172	2.33055e-63		4
KCTD20	6p21.31	0.237584	3.16001e-06		4
KCTD21	11q14.1	-0.633873	2.10804e-14		4
KDM1A	1p36.12	0.557049	2.99852e-37		4
KIAA1522	1p35.1	-0.553357	9.11774e-17		4
KIF20A	5q31.2	1.39132	7.21132e-28		4
KIF3A	5q31.1	-0.862945	1.66216e-36		4
KITLG	12q21.32	-1.73347	2.85224e-37		4
KLHL15	Xp22.11	0.34285	1.85263e-06		4
KLHL30	2q37.3	0.533722	0.000760449		4
KLHL36	16q24.1	0.407905	1.98215e-11		4
KLK11	19q13.41	0.840704	0.0392066		4
KLK1	19q13.33	0.938268	1.44904e-06		4
KLK13	19q13.41	1.44671	1.59652e-07		4
KRT222	17q21.2	-2.31339	5.29242e-34		4
KYNU	2q22.2	0.89298	7.75741e-08		4
LAP3	4p15.32	0.148829	0.0309915		4
LDLRAD1	1p32.3	-3.39639	4.0616e-59		4
LMNA	1q22	0.515986	1.85177e-10		4
LONRF3	Xq24	0.401972	0.0039555		4
LPAR1	9q31.3	-0.562398	2.30048e-08		4
LPCAT1	5p15.33	0.341175	8.09522e-06		4
LPHN1	-	-0.272489	0.00116652		4
LPIN1	2p25.1	1.44149	1.52683e-65		4
LRG1	19p13.3	-3.04224	2.33122e-32		4
LRRC42	1p32.3	0.454868	6.98241e-15		4
LRRTM2	5q31.2	-0.777399	5.34248e-08		4
LRTM2	12p13.33	-1.1422	3.61593e-05		4
LTBP3	11q13.1	-0.333253	3.96898e-05		4
LUZP2	11p14.3	-2.04778	1.10358e-20		4
LYSMD4	15q26.3	0.55727	3.26926e-13		4
MAP3K6	1p36.11	0.479791	3.29009e-09		4
MAP4K2	11q13.1	0.320111	1.10512e-07		4
MAP6	11q13.5	-0.535957	9.87837e-05		4
MAPK10	4q21.3	-0.610621	0.000320499		4
MBIP	14q13.3	0.152644	0.0165451		4
MCCC1	3q27.1	0.904947	5.89322e-43		4
MCCC2	5q13.2	-1.62955	2.18624e-64		4
MDH1B	2q33.3	-0.96949	2.87102e-16		4
MDM4	1q32.1	-0.374013	4.69693e-08		4
MEAF6	1p34.3	-0.338276	4.07451e-10		4
MECP2	Xq28	-0.151653	0.000957692		4
METAP1	4q23	0.364578	2.63938e-13		4
METTL16	17p13.3	-0.0991395	0.0431103		4
METTL7B	12q13.2	1.17759	1.76326e-11		4
MFAP1	15q15.3	-0.4718	2.1913e-23		4
MFAP3L	4q33	0.768684	1.99647e-08		4
MFSD8	4q28.2	-0.315648	6.61128e-11		4
MFSD9	2q12.1	0.262034	1.62762e-06		4
MKNK1	1p33	0.127647	0.00356611		4
MLXIPL	7q11.23	-0.941311	3.22478e-07		4
MOXD1	6q23.2	0.740347	1.40845e-07		4
MPP3	17q21.31	-0.6156	2.0219e-11		4
MS4A14	11q12.2	-1.40655	5.77809e-16		4
MSANTD4	11q22.3	0.272789	0.000428215		4
MSTO1	1q22	0.415164	3.0567e-13		4
MTG2	20q13.33	0.124112	0.0461286		4
MUC3A	7q22.1	0.898982	9.69301e-11		4
MUS81	11q13	0.302335	5.69666e-08		4
MVP	16p11.2	-0.705297	3.44221e-17		4
MYBPH	1q32.1	0.901897	4.99121e-08		4
MYO15B	17q25.1	-0.754833	5.13645e-10		4
NARF	17q25.3	0.786133	2.13951e-34		4
NAT10	11p13	0.376128	4.35945e-13		4
NBR1	17q21.31	-0.709998	3.91982e-35		4
NCAPG2	7q36.3	0.795082	1.67245e-24		4
NCF4	22q12.3	0.548189	3.11843e-08		4
NDC80	18p11.32	1.67025	1.95356e-44		4
NDRG2	14q11.2	1.15166	4.0358e-23		4
NDUFAF1	15q15.1	-0.534097	1.52722e-23		4
NEMF	14q21.3	-0.138048	0.0358899		4
NIPA1	15q11.2	-0.226624	0.00255111		4
NIPAL4	5q33.3	1.98895	7.12198e-28		4
NKRF	Xq24	0.519484	2.31893e-26		4
NOA1	4q12	0.209464	1.36736e-06		4
NOL11	17q24.2	0.245186	0.000153964		4
NPAS1	19q13.32	-1.46196	2.77415e-28		4
NR1H3	11p11.2	0.21783	0.00475397		4
NRF1	7q32.2	0.0855825	0.000793312		4
NSL1	1q32.3	-0.244544	4.84309e-07		4
NT5C2	10q24.32-q24.33	0.758616	2.53929e-16		4
NUP93	16q13	0.928094	1.3405e-54		4
NYAP1	7q22.1	0.324603	0.0412324		4
OBFC1	-	-0.352966	6.35466e-13		4
ODF2L	1p22.3	0.529106	7.52178e-14		4
OLFML2A	9q33.3	-0.647037	3.15222e-14		4
OR7A5	19p13.1	1.32158	7.27723e-18		4
OSBPL6	2q31.2	-1.16081	2.46685e-16		4
OSR2	8q22.2	-0.502833	0.002191		4
OXER1	2p21	1.22221	1.19513e-22		4
P4HA3	11q13.4	-0.749804	2.62274e-09		4
PACSIN2	22q13.2	0.225414	0.000350876		4
PAG1	8q21.13	0.547299	1.38523e-08		4
PAICS	4q12	0.396558	9.04314e-10		4
PARD3B	2q33.3	-0.512466	2.223e-11		4
PARP10	8q24.3	-0.292586	0.00974864		4
PARVG	22q13.31	0.489458	1.46391e-06		4
PAX2	10q24.31	-2.78063	8.4703e-25		4
PBDC1	Xq13.3	0.227228	0.000176397		4
PCDHB15	5q31.3	-0.364517	0.000267203		4
PCDHGA10	5q31.3	-0.614006	0.000155971		4
PCYT1A	3q29	0.113133	0.00958836		4
PDK4	7q21.3	-1.00527	6.25822e-09		4
PELI2	14q22.3	-0.258163	0.0342874		4
PES1	22q12.2	0.591702	3.7281e-18		4
PEX11B	1q21.1	-0.147058	0.00684506		4
PFKFB3	10p15.1	-0.325877	0.00313528		4
PI4K2B	4p15.2	0.378268	9.42634e-10		4
PIAS3	1q21.1	-0.289273	1.17006e-05		4
PIGZ	3q29	0.331934	0.000139756		4
PIH1D1	19q13.33	-0.133649	0.0452249		4
PIM2	Xp11.23	0.743082	2.83848e-15		4
PIWIL4	11q21	1.13176	1.11719e-28		4
PKD2L2	5q31.2	-0.324573	0.00525542		4
PLA2G6	22q13.1	-0.298922	0.00143013		4
PLEKHH3	17q21.2	-0.731063	2.81705e-18		4
PMEPA1	20q13.31	0.222851	0.0291001		4
PML	15q24.1	0.70007	1.85743e-31		4
PNISR	6q16.2	0.155434	0.0203666		4
POLR2F	22q13.1	3.41986	1.10584e-79		4
POM121L9P	22q11.23	0.870571	3.84279e-11		4
POMP	13q12.3	0.222302	0.000575384		4
PPARA	22q13.31	1.32837	3.19963e-45		4
PPM1H	12q14.1-q14.2	-0.692462	1.9639e-08		4
PPP1R26	9q34.3	-0.617601	6.96691e-20		4
PPT1	1p34.2	-0.423163	1.90799e-09		4
PRCC	1q23.1	0.371992	5.04048e-13		4
PRKAG2	7q36.1	0.215951	0.000120484		4
PRLR	5p13.2	-1.83092	1.42327e-47		4
PRMT3	11p15.1	0.182642	0.00270672		4
PRR12	19q13.33	-0.372497	1.4209e-09		4
PRSS8	16p11.2	-0.600713	3.70008e-07		4
PSEN1	14q24.2	-0.342945	1.66473e-13		4
PSEN2	1q42.13	-0.344884	5.38593e-08		4
PSG5	19q13.31	-0.808803	4.20258e-06		4
PSMD12	17q24.2	0.214311	0.00302361		4
PSMD5	9q33.2	-0.203927	0.00132167		4
PTBP2	1p21.3	0.473104	4.11071e-12		4
PTOV1	19q13.33	-0.221115	0.00191021		4
PUS10	2p16.1-p15	0.214505	0.000185507		4
PUS7	7q22.3	0.832009	9.48076e-38		4
R3HDM1	2q21.3	0.616422	2.75033e-30		4
RAB11FIP2	10q26.11	-0.199718	0.000794746		4
RAB11FIP4	17q11.2	-0.468304	4.14415e-08		4
RAB21	12q21.1	-0.386868	9.86484e-14		4
RAD51	15q15.1	1.01898	1.08293e-20		4
RAD51B	14q24.1	0.719882	2.24105e-15		4
RAD54L	1p34.1	1.58779	1.37347e-42		4
RAP1GDS1	4q23	-0.331844	8.63035e-06		4
RASA2	3q23	0.458732	1.58833e-13		4
RASGRP3	2p22.3	0.605957	1.23237e-15		4
RBM8A	1q21.1	0.389189	3.25287e-17		4
RBMS1	2q24.2	0.890827	7.09258e-28		4
RECQL	12p12.1	0.300404	0.00043929		4
REPS2	Xp22.2	-1.87102	4.51603e-37		4
RFX7	15q21.3	-0.347976	8.42888e-08		4
RGS6	14q24.2	1.40559	1.92637e-13		4
RGS8	1q25.3	-0.534743	0.00138962		4
RIBC1	Xp11.22	-1.53181	8.51984e-47		4
RNASEH2A	19p13.13	0.620387	7.33936e-15		4
RND1	12q13.12	-2.39124	2.79811e-61		4
RNF157	17q25.1	-0.787766	1.31184e-08		4
RRM1	11p15.4	0.155277	0.0183118		4
RTKN2	10q21.2	0.882704	4.10307e-18		4
RXFP1	4q32.1	0.680586	8.6273e-06		4
S1PR3	9q22.1	-0.939364	1.62546e-18		4
SAMD8	10q22.2	-0.577911	4.63715e-16		4
SAMSN1	21q11.2	0.312284	0.00361812		4
SCAI	9q33.3	-0.197705	0.00151522		4
SCARA3	8p21.1	0.487832	0.00012182		4
SCCPDH	1q44	-1.40132	1.59021e-49		4
SDC1	2p24.1	0.4377	0.000685607		4
SDCCAG3	9q34.3	0.189235	0.000145805		4
SDPR	-	-1.11591	9.23049e-11		4
SDR16C5	8q12.1	-2.31444	1.99957e-14		4
SEC14L4	22q12.2	2.66515	1.56958e-40		4
SEC23IP	10q26.11-q26.12	-0.401633	2.84249e-13		4
SEC61A2	10p14	0.202842	0.00250668		4
SECISBP2	9q22.2	-0.468748	4.80147e-21		4
2019-09-02	2q37.3	-0.112316	0.00557635		4
2019-09-04	17q22	0.33411	0.000220706		4
SEPT7P2	7p12.3	-0.345719	4.21234e-08		4
SERAC1	6q25.3	0.316353	1.22664e-07		4
SERPINA4	14q32.13	-1.47792	2.83021e-14		4
SERPING1	11q12.1	0.304269	0.00550633		4
SETD8	-	0.346466	3.58318e-12		4
SFRP1	8p11.21	3.82536	2.57418e-44		4
SFXN2	10q24.32	-1.11639	6.26861e-28		4
SGSM3	22q13.1	0.186515	0.0115681		4
SH3BGRL	Xq21.1	-1.37231	4.32638e-29		4
SHD	19p13.3	1.07407	5.03556e-12		4
SHMT2	12q12-q14	0.685737	8.62762e-26		4
SIDT1	3q13.2	-3.13572	1.46272e-100		4
SIGLEC10	19q13.41	0.558463	1.00686e-07		4
SIK2	11q23.1	0.356459	1.91988e-06		4
SLAIN1	13q22.3	1.66258	9.87731e-18		4
SLC22A4	5q31.1	-1.26565	6.58006e-29		4
SLC25A18	22q11.21	-0.721622	5.59877e-08		4
SLC25A41	19p13.3	-0.356938	0.0136649		4
SLC2A9	4p16.1	0.408707	3.26189e-07		4
SLC35A2	Xp11.23	0.212884	0.000157508		4
SLC46A3	13q12.3	-0.504289	9.55425e-08		4
SLC4A1AP	2p23.3	0.386964	7.96362e-28		4
SLC6A11	3p25.3	3.96304	4.54078e-45		4
SLC6A15	12q21.31	3.39375	5.08352e-37		4
SLC6A7	5q32	0.531314	0.000271076		4
SLC7A6OS	16q22.1	0.28462	1.67307e-07		4
SLC9A7P1	12q23.1	0.911891	4.18818e-11		4
SLCO4A1	20q13.33	1.61545	9.28653e-24		4
SMAD3	15q22.33	-0.496444	1.82223e-11		4
SMAD9	13q13.3	0.340114	0.000878438		4
SMURF1	7q22.1	0.338343	7.41244e-13		4
SMYD5	2p13.2	0.274165	1.46925e-10		4
SNX19	11q24.3-q25	-0.320352	1.1875e-09		4
SNX27	1q21.3	-0.134843	0.0235246		4
SOX30	5q33.3	1.16696	7.83847e-18		4
SP110	2q37.1	-0.421312	4.45868e-07		4
SP6	17q21.32	0.381461	0.00297759		4
SPATC1	8q24.3	0.424098	0.000823946		4
SPDYC	11q13.1	1.18732	0.000657066		4
SPOPL	2q22.1	-1.18168	2.7307e-49		4
SREBF1	17p11.2	-1.01734	3.77569e-20		4
ST6GAL2	2q12.3	-0.963447	3.69145e-09		4
STAMBP	2p13.1	0.128462	0.000522093		4
STAP1	4q13.2	0.542763	0.000869013		4
STAP2	19p13.3	0.220788	0.0147093		4
STARD13	13q13.1	-0.718516	8.67603e-17		4
STIL	1p33	1.29113	3.96559e-38		4
STIM1	11p15.4	0.35606	4.01601e-08		4
STK38	6p21.31	0.87504	4.60466e-53		4
STK4	20q13.12	0.110496	0.0433811		4
STOX2	4q35.1	1.88763	9.81127e-44		4
STRADA	17q23.3	-0.305863	3.57453e-07		4
STX19	3q11.2	1.49672	5.47848e-18		4
SYAP1	Xp22.2	-0.593649	3.64988e-18		4
SYT14	1q32.2	0.434989	0.0470012		4
TAF5	10q24.33	0.80419	2.01466e-50		4
TAGAP	6q25.3	0.873242	5.32813e-13		4
TAP1	6p21.32	0.95938	1.672e-16		4
TBX19	1q24.2	1.5903	8.65476e-74		4
TBX4	17q23.2	1.05041	7.23191e-09		4
TCEAL2	Xq22.1	0.560476	0.0161606		4
TCF3	19p13.3	0.624081	1.11433e-22		4
TEX10	9q31.1	0.632458	8.49353e-41		4
TFR2	7q22.1	0.843231	1.45382e-06		4
TGDS	13q32.1	0.361584	1.04912e-11		4
THSD1	13q14.3	-0.606655	3.31832e-14		4
TIMMDC1	3q13.33	0.357381	1.31145e-17		4
TLE1	9q21.32	1.05157	5.40931e-20		4
TLE2	19p13.3	-0.423725	6.0802e-05		4
TLR9	3p21.2	0.418381	0.000155361		4
TM9SF1	14q12	-0.366689	2.29227e-13		4
TMEM165	4q12	0.242923	5.63843e-07		4
TMEM199	17q11.2	-0.447128	1.66495e-13		4
TMEM200C	18p11.31	1.41215	4.40389e-20		4
TMEM214	2p23.3	0.370577	3.78725e-15		4
TMEM67	8q22.1	-0.525805	1.0668e-11		4
TMPO	12q23.1	0.647555	3.15962e-21		4
TNFRSF8	1p36.22	0.994767	1.46693e-13		4
TNFSF15	9q32	0.970166	1.22244e-10		4
TNFSF4	1q25.1	-0.281691	0.0187792		4
TOMM34	20q13.12	0.48901	1.08383e-16		4
TOP2A	17q21.2	0.883615	6.91461e-10		4
TOX	8q12.1	1.40931	8.2096e-19		4
TPK1	7q35	-0.164907	0.0410556		4
TPMT	6p22.3	0.198302	0.0009656		4
TPST1	7q11.21	0.222654	0.00777223		4
TRAPPC4	11q23.3	-0.216762	7.71211e-05		4
TRDMT1	10p13	0.975959	2.34692e-33		4
TREM1	6p21.1	1.03314	1.37511e-10		4
TRIM25	17q23.1	0.252245	0.000307025		4
TRIM39	6p22.1	0.206012	1.05239e-07		4
TRIM4	7q22.1	-0.383925	1.03097e-13		4
TRIP4	15q22.31	-0.107295	0.0077037		4
TRMT6	20p12.3	0.4603	1.44059e-18		4
TSPAN9	12p13.33-p13.32	-0.442143	1.73198e-10		4
TTC39C	18q11.2	-0.645559	2.31375e-15		4
TTI1	20q11.23	0.167548	0.00589523		4
TTPAL	20q13.12	0.131135	0.0133663		4
TUBAL3	10p15.1	-0.401286	0.0292422		4
TUBB1	20q13.32	0.430867	0.000815857		4
TULP1	6p21.31	1.16901	1.49468e-18		4
U2AF2	19q13.43	0.105001	0.0361594		4
UBAP1L	15q22.31	-0.791342	3.3648e-14		4
UBXN7	3q29	0.272553	1.39355e-05		4
UPF1	19p13.11	0.107128	0.0123338		4
UPRT	Xq13.3	-0.0997588	0.0480578		4
USH1G	17q25.1	0.533182	0.0060215		4
USP28	11q23.2	0.400672	1.32568e-11		4
USP49	6p21.1	0.683918	6.62012e-22		4
VMP1	17q23.1	-0.616714	4.6153e-14		4
VSTM4	10q11.23	-0.680478	1.72069e-09		4
WASF3	13q12.13	0.989045	1.11625e-13		4
WDR43	2p23.2	0.707607	2.85558e-44		4
WDR59	16q23.1	0.384086	1.32141e-14		4
WDR91	7q33	0.531579	1.39123e-23		4
WNT9A	1q42.13	-0.554424	1.74832e-05		4
WRNIP1	6p25.2	0.463903	1.38522e-20		4
XIAP	Xq25	-0.348573	9.32371e-13		4
YIF1A	11q13.2	0.239537	0.00100498		4
YIPF1	1p32.3	-0.52502	1.29271e-19		4
ZBP1	20q13.31	0.927201	1.15599e-07		4
ZBTB2	6q25.1	-0.134245	0.0260435		4
ZBTB32	19q13.12	0.865407	7.18136e-12		4
ZBTB6	9q33.2	-0.408201	1.13774e-11		4
ZBTB8OS	1p35.1	0.226235	7.12217e-06		4
ZC3H12D	6q25.1	0.699697	2.11339e-08		4
ZCCHC14	16q24.2	0.254198	4.71129e-06		4
ZDHHC1	16q22.1	-0.480545	3.21438e-09		4
ZDHHC20	13q12.11	0.382495	9.71048e-09		4
ZDHHC8P1	22q11.23	0.61733	1.28117e-05		4
ZDHHC9	Xq26.1	0.311355	3.54907e-07		4
ZFPL1	11q13.1	0.233221	4.18905e-05		4
ZFR2	19p13.3	0.533012	0.0172475		4
ZFYVE9	1p32.3	0.275262	0.00417723		4
ZMYND15	17p13.2	0.658296	9.27185e-12		4
ZNF124	1q44	0.863078	1.77872e-24		4
ZNF202	11q23.3	0.316097	4.44303e-10		4
ZNF230	19q13.31	-0.395319	9.52037e-12		4
ZNF286B	17p11.2	1.01518	3.22777e-29		4
ZNF385A	12q13.13	-1.29865	7.39077e-36		4
ZNF443	19p13.2	-0.399803	2.97936e-09		4
ZNF45	19q13.2	-0.236703	5.80154e-05		4
ZNF454	5q35.3	1.66125	3.85479e-46		4
ZNF468	19q13.41	-0.407956	1.00125e-08		4
ZNF510	9q22.33	-0.298516	9.66239e-07		4
ZNF574	19q13.2	0.205053	7.0987e-05		4
ZNF594	17p13.2	-0.235563	0.00269406		4
ZNF695	1q44	2.18933	9.06671e-43		4
ZNF704	8q21.13	-0.428222	0.000114343		4
ZNF74	22q11.21	0.568229	3.19569e-24		4
ZNF813	19q13.42	-0.225037	0.00484048		4
ZNF853	7p22.1	-0.377424	0.00111393		4
ZNRF2	7p14.3	-0.573527	3.95884e-17		4
ZSCAN1	19q13.43	-1.83077	1.3169e-14		4
ZSCAN25	7q22.1	0.102375	0.0100377		4
SLC25A6	Xp22.32 and Yp11.3	0.197411	0.0166977		3
PPP2R3B	Xp22.3 and Yp11.3	0.33242	0.00011002		3
AAAS	12q13.13	-0.2976	6.49447e-12		3
AADAT	4q33	1.75263	3.0624e-39		3
ABCD4	14q24.3	-0.250139	3.8944e-06		3
ACR	22q13.33	1.0838	2.43392e-17		3
ACY3	11q13.2	1.28186	1.3227e-09		3
ADAL	15q15.3	-0.589058	7.41865e-23		3
ADAMTS8	11q24.3	-0.528293	0.00599508		3
ADCY6	12q13.12	-0.908607	1.17038e-37		3
ADH6	4q23	0.98355	1.49697e-13		3
ADPGK	15q24.1	0.275743	5.81961e-13		3
ADPRHL2	1p34.3	0.437927	2.95087e-13		3
AFTPH	2p14	-0.396857	5.06707e-16		3
AGK	7q34	0.281339	2.81808e-10		3
AGMO	7p21.2	0.490448	0.00325661		3
AGPAT6	-	-0.189179	0.03218		3
AGXT2	5p13.2	-1.32448	7.55527e-14		3
AK4	1p31.3	0.548703	0.000565241		3
AKR1B1	7q33	0.841561	8.39499e-23		3
AKR1E2	10p15.1	2.3211	2.21894e-50		3
AKR7L	1p36.13	-1.50947	9.77283e-28		3
AKT1	14q32.33	-0.181803	0.00223792		3
ALDH2	12q24.12	-0.295522	0.0174435		3
ALDOC	17q11.2	0.59208	0.000236863		3
AMBP	9q32	-2.64157	2.84647e-38		3
ANGPTL2	9q33.3	-0.277863	0.0161356		3
ANGPTL6	19p13.2	0.439637	3.64243e-05		3
ANKDD1A	15q22.31	0.375927	8.6172e-08		3
ANKEF1	20p12.2	-0.75755	4.07642e-20		3
ANKRD53	2p13.3	0.732486	8.01614e-11		3
ANO7	2q37.3	0.388516	0.00233975		3
AOC4P	17q21.31	-0.359786	0.00568904		3
AP1M2	19p13.2	-0.628628	1.93714e-11		3
AP1S1	7q22.1	0.273109	4.83771e-05		3
AP5M1	14q22.3	-0.297912	2.06329e-09		3
APBA3	19p13.3	0.229748	0.000412844		3
APH1B	15q22.2	-1.28526	1.51458e-52		3
APOL6	22q12.3	0.463782	9.0201e-06		3
APPL1	3p14.3	-0.215842	0.000458827		3
ARF1	1q42.13	0.212953	0.000157779		3
ARG1	6q23.2	-0.384165	0.00176466		3
ARG2	14q24.1	0.782546	3.74735e-16		3
ARMC10	7q22.1	0.203911	1.10092e-05		3
ARMC1	8q13.1	0.326617	6.53129e-07		3
ARPC5	1q25.3	0.560157	1.70322e-26		3
ARPC5L	9q33.3	0.405138	5.71626e-12		3
ARRDC3	5q14.3	0.202399	0.0210039		3
ARSB	5q14.1	0.387876	3.94795e-07		3
ARSG	17q24.2	-1.93809	9.3814e-80		3
ASB12	Xq11.2	1.35708	8.85781e-23		3
ASIC4	2q35	0.447408	0.00210401		3
ASUN	-	0.785324	3.30715e-41		3
ATF6B	6p21.3	0.148242	0.00288716		3
ATG3	3q13.2	0.302493	7.2501e-16		3
ATL2	2p22.2-p22.1	1.08467	6.20211e-60		3
ATP2A3	17p13.2	-0.835198	6.35996e-09		3
AVPR2	Xq28	-0.882265	5.8455e-08		3
B3GALT4	6p21.32	-0.318581	0.000258818		3
B4GALT6	18q12.1	0.536083	1.07476e-07		3
BACH1	21q21.3	0.33489	1.82813e-05		3
BAIAP2	17q25.3	-0.557937	6.53949e-12		3
BAK1	6p21.31	0.76587	4.04257e-35		3
BATF3	1q32.3	1.00737	4.75766e-22		3
BCL7C	16p11.2	0.164182	0.0472972		3
BICD2	9q22.31	0.309857	1.12012e-10		3
BIN1	2q14.3	0.81253	8.842e-14		3
BLNK	10q24.1	-0.724206	4.33942e-16		3
BMI1	10p12.2	-0.586775	2.94679e-12		3
BMP2	20p12.3	1.44759	3.87943e-24		3
BMP5	6p12.1	0.932347	0.000314614		3
BMP8B	1p34.2	0.439483	0.00301135		3
BTBD10	11p15.3	-0.111723	0.0156643		3
BTBD16	10q26.13	0.40466	0.00484443		3
BTN3A2	6p22.2	0.548322	5.15762e-09		3
BVES	6q21	0.775107	4.19677e-12		3
C11orf45	11q24.3	0.643058	1.55529e-11		3
C11orf48	-	-0.196601	0.00644598		3
C12orf57	12p13.31	-0.195091	0.0255355		3
C16orf89	16p13.3	-1.96233	7.19706e-14		3
C19orf12	19q12	0.469051	1.88017e-17		3
C19orf40	-	0.225341	0.000178601		3
C19orf47	19q13.2	0.443349	9.60069e-15		3
C1orf194	1p13.3	-1.05165	8.68518e-11		3
C6orf136	6p21.33	0.453945	3.55597e-14		3
C6orf58	6q22.33	0.483475	9.04893e-05		3
C6orf62	6p22.3	0.216554	2.70389e-06		3
C9orf41	-	-0.189363	0.000412009		3
C9orf89	-	-0.587084	4.36516e-14		3
CABLES1	18q11.2	-0.389541	1.11211e-06		3
CALCOCO1	12q13.13	-0.674083	3.70048e-31		3
CAPG	2p11.2	0.342086	0.000329259		3
CASP2	7q34	0.518495	8.7594e-24		3
CBFA2T2	20q11.21-q11.22	-0.132742	0.0121819		3
CBR1	21q22.12	1.01003	1.12474e-18		3
CCDC121	2p23.3	-0.193189	0.00109267		3
CCDC151	19p13.2	-1.49756	3.06717e-20		3
CCDC157	22q12.2	-0.383693	1.75654e-06		3
CCDC169	13q13.3	0.839418	9.16368e-06		3
CCDC22	Xp11.23	-0.268285	3.61327e-06		3
CCDC85A	2p16.1	-0.863042	1.14815e-07		3
CCHCR1	6p21.33	0.73219	4.05214e-19		3
CCM2L	20q11.21	-0.500664	6.52805e-08		3
CCNJL	5q33.3	1.00615	3.38271e-12		3
CCR3	3p21.31	0.400866	0.00561698		3
CCT7	2p13.2	0.359372	6.76494e-12		3
CCZ1B	7p22.1	0.316781	7.50514e-08		3
CD38	4p15.32	1.74296	1.30716e-20		3
CDH2	18q12.1	0.43067	0.0157359		3
CDHR4	3p21.31	-1.90053	9.6148e-16		3
CDK15	2q33.1	-1.2513	4.61581e-19		3
CDK16	Xp11.3	0.606588	9.89957e-28		3
CDK20	9q22.1	-0.539681	1.74206e-19		3
[truncated: 4,889 more rows]
