# Supplementary material for: Delineation of the Germline and Somatic Mutation Interaction Landscape in Triple-Negative and Non-Triple-Negative Breast Cancer
Source: Int J Genomics. 2020 Jul 6;2020:2641370. doi: 10.1155/2020/2641370 (PMC7364202; doi:10.1155/2020/2641370)
Supplement: Supplementary Materials — All additional results from the analysis are shown in the supplementary tables described. Supplementary Table SG: GWAS information-genetic variants and genes associated with an increased risk of developing breast cancer. Supplementary Table SM: somatic mutated genes significantly associated with TNBC vs. control and non-TNBC vs. control. Supplementary Table SN: nonsomatic mutated genes significantly associated with TNBC vs. control and non-TNBC vs. control. Supplementary Table S2A1: list of all somatic mutated genes significantly associated with TNBC. Supplementary Table S2A2: list of all somatic mutated genes significantly associated with non-TNBC. Supplementary Table S1: differentially expressed and uniquely somatic mutated genes between TNBC and non-TNBC. Supplementary Table SA3: significantly differentially expressed germline mutated genes with and without somatic mutations in TNBC. Supplementary Table SB3: significantly differentially expressed germline mutated genes with and without somatic mutations in non-TNBC. Supplementary Table S3A: genes containing both germline and somatic mutations significantly associated with TNBC. Supplementary Table S3B: genes containing both germline and somatic mutations significantly associated with non-TNBC. Supplementary Table S3C: a complete list of 251 genes containing both germline and somatic mutations distinguishing TNBC from non-TNBC. [file 2641370.f1.zip › mat.2641370.v2/TABLE S2A1.xlsx]

## Sheet: 08.TNBC.ERPBC.1489TNBC.ERPBC.So
Table S2A1. List of all somatic mutated genes significantly associated with TNBC.
Genes	Chromosome position	logFC	P.value	adj.P.Val	Somatic Mutation Event in TNBC	Somatic Mutation Event in non-TNBC
COPE	19p13.11	1.04188	1.06051e-29	1.77891e-28	3
CPSF3L	-	0.205235	0.00125815	0.00237444	3
ENPP5	6p21.1	-0.316119	0.0134086	0.021455	3
MRPL55	1q42.13	0.94447	1.71745e-23	1.84066e-22	3
RBM22	5q33.1	-0.318075	6.25698e-10	2.34492e-09	3
AGPAT9	-	-0.582196	1.30541e-06	3.56233e-06	2
ALB	4q13.3	-2.25608	3.31265e-22	3.21904e-21	2
ASF1B	19p13.12	2.79812	2.85816e-78	2.48047e-75	2
BMP4	14q22.2	-1.63259	4.9047e-48	3.00464e-46	2
C11orf16	11p15.4	0.161066	0.000659332	0.00129507	2
C3orf62	3p21.31	-0.187587	5.15017e-08	1.62771e-07	2
CADM4	19q13.31	0.712013	9.51363e-07	2.64046e-06	2
CALB2	16q22.2	-0.809562	0.0015809	0.00293834	2
CAP1	1p34.2	0.323871	2.64234e-08	8.58178e-08	2
CCDC130	19p13.13	0.24269	0.000408595	0.000824894	2
COL21A1	6p12.1	-0.272979	3.17423e-06	8.29573e-06	2
CRIP1	14q32.33	-0.0873952	4.90813e-08	1.55512e-07	2
CYP2W1	7p22.3	0.094293	0.0142345	0.0226918	2
FAM138B	2q14.1	-0.0194487	4.5512e-07	1.30747e-06	2
FANCF	11p14.3	0.536675	2.61114e-11	1.10183e-10	2
FGD1	Xp11.22	0.93159	3.03078e-21	2.74192e-20	2
FHL3	1p34.3	0.485588	9.98813e-07	2.76626e-06	2
FKBPL	6p21.32	1.02496	9.15687e-36	2.35878e-34	2
GDPD5	11q13.4-q13.5	-0.570051	5.04835e-08	1.59747e-07	2
GFI1	1p22.1	0.274853	5.95148e-07	1.68582e-06	2
HCP5	6p21.33	0.407206	0.000810991	0.00157254	2
HILPDA	7q32.1	0.736109	6.95148e-10	2.59373e-09	2
HOXA7	7p15.2	-0.970476	1.70541e-32	3.51597e-31	2
HOXD13	2q31.1	0.441372	3.56394e-06	9.26308e-06	2
HRAS	11p15.5	0.650394	2.49657e-09	8.8928e-09	2
IGSF21	1p36.13	-0.464026	7.39955e-05	0.00016466	2
INPP5A	10q26.3	-0.569209	9.15105e-24	1.00257e-22	2
JAG2	14q32.33	-0.400264	9.90577e-06	2.45039e-05	2
KLHL26	19p13.11	-0.207517	1.67155e-05	4.02669e-05	2
LETMD1	12q13.12	-1.07181	1.49411e-48	9.50445e-47	2
MALSU1	7p15.3	0.380823	1.10657e-12	5.21859e-12	2
MAPK8IP2	22q13.33	0.802442	9.47777e-11	3.81308e-10	2
MMP21	10q26.2	-0.0465851	7.32143e-07	2.05424e-06	2
MRPL45P2	17q21.32	-0.298626	1.96237e-10	7.68626e-10	2
MT-ND6	mitochondria	-1.08473	3.56035e-12	1.61111e-11	2
NCCRP1	19q13.2	1.42632	2.62579e-12	1.20088e-11	2
NKX2-5	5q34	0.936273	1.12689e-15	6.748e-15	2
P2RY2	11q13.4	-0.264706	0.0119176	0.0192458	2
PABPN1L	16q24.3	-0.0118129	0.0201587	0.031286	2
PMP22	17p12	-1.17015	4.62646e-20	3.83871e-19	2
PRLHR	10q26.11	-0.00863439	0.00793655	0.0132263	2
PROZ	13q34	0.101025	2.18734e-05	5.19708e-05	2
PRSS27	16p13.3	0.814977	1.85297e-19	1.467e-18	2
RAB1A	2p14	0.356334	3.14547e-12	1.43047e-11	2
RBM17	10p15.1	0.662039	1.17765e-21	1.09531e-20	2
RBM4B	11q13	0.190726	0.000130881	0.00028215	2
RCOR3	1q32.2-q32.3	-0.33025	4.00389e-07	1.15781e-06	2
RNF130	5q35.3	-0.156112	0.00864488	0.0143282	2
RNF26	11q23	0.203723	0.0019411	0.00355757	2
SLC25A10	17q25.3	0.99767	7.7785e-21	6.83855e-20	2
SNN	16p13.13	-0.562918	1.69028e-09	6.11036e-09	2
SPNS2	17p13.2	-0.449473	8.52954e-05	0.000188266	2
SPPL2B	19p13.3	0.286453	0.000221074	0.000462261	2
SYNGR4	19q13.33	0.174322	2.04695e-13	1.02629e-12	2
TFAP2E	1p34.3	0.357541	6.71342e-08	2.09507e-07	2
TMEM107	17p13.1	-0.146706	0.00256464	0.00462046	2
TOMM40L	1q23.3	0.757693	1.67481e-27	2.38651e-26	2
A4GALT	22q13.2	-0.33757	0.00360717	0.00635452	1
AACSP1	5q35.3	0.108749	1.628e-06	4.39723e-06	1
AAGAB	15q23	0.200438	0.000749759	0.00146088	1
ACN9	-	0.427939	5.99328e-08	1.88145e-07	1
ACVR1	2q24.1	-0.570185	5.81295e-15	3.29983e-14	1
AIRE	21q22.3	0.0193098	0.00985785	0.0161768	1
AKR1C3	10p15.1	-1.9753	5.33716e-26	6.87661e-25	1
ALG1L9P	11q13.4	0.23524	2.00798e-08	6.5896e-08	1
ALKBH3	11p11.2	-0.317622	7.13309e-05	0.000159006	1
ANAPC2	9q34.3	-0.163714	0.0174519	0.0273613	1
ANKRA2	5q13.2	-0.908749	1.08041e-35	2.76165e-34	1
ANKRD29	18q11.2	-1.75064	4.59612e-80	4.65357e-77	1
ANKRD45	1q25.1	0.346311	1.377e-09	5.01514e-09	1
ANTXR2	4q21.21	-1.44303	6.20273e-37	1.74721e-35	1
AOX2P	2q33.1	-0.0361931	1.44013e-07	4.34469e-07	1
APCDD1L	20q13.32	-0.614339	0.0004318	0.000869228	1
APOBEC3F	22q13.1	0.213025	0.00570905	0.00973862	1
ARHGAP11B	15q13.2	0.698052	3.08473e-41	1.17614e-39	1
ARHGEF16	1p36.32	0.419349	1.97787e-05	4.72775e-05	1
ARL6IP5	3p14.1	-0.66131	1.40409e-21	1.29929e-20	1
ATF7	12q13.13	-0.719786	2.47768e-34	5.78548e-33	1
ATMIN	16q23.2	-0.192326	0.00152534	0.00284217	1
ATP1B3	3q23	0.877125	2.12874e-24	2.4454e-23	1
ATP5L	-	0.243047	4.5237e-05	0.000103437	1
ATXN1L	16q22.2	-0.625399	5.87752e-16	3.60605e-15	1
ATXN7L3	17q21.31	0.430975	7.81827e-14	4.0566e-13	1
BABAM1	19p13.11	0.581304	7.72675e-24	8.51133e-23	1
BATF2	11q13.1	0.826073	2.61708e-10	1.01277e-09	1
BCL2A1	15q25.1	1.6377	3.26897e-21	2.95228e-20	1
BLOC1S5	6p24.3	-0.148452	0.0169165	0.0265927	1
BMF	15q15.1	0.715482	2.68253e-15	1.5637e-14	1
BMP8A	1p34.3	0.480186	2.41793e-21	2.20333e-20	1
BNIP2	15q22.2	-0.690873	9.37158e-30	1.57999e-28	1
C12orf76	12q24.11	-0.152409	0.000110173	0.000239936	1
C19orf67	19p13.12	0.0237951	0.00412095	0.00719632	1
C19orf70	19p13.3	0.290741	0.000999198	0.00191467	1
C1orf210	1p34.2	0.418223	0.00361231	0.00636266	1
C1orf228	-	0.175499	0.00027385	0.000565993	1
C2orf27A	2q21.2	-0.339947	2.90529e-09	1.02853e-08	1
C8orf76	8q24.13	0.894426	1.08137e-49	7.47928e-48	1
CCDC126	7p15.3	-0.51285	1.90244e-16	1.2104e-15	1
CCDC89	11q14.1	-0.440044	5.38168e-20	4.44308e-19	1
CCRN4L	-	0.330556	0.000373913	0.000759071	1
CD164L2	1p36.11	-0.365027	3.57683e-05	8.28411e-05	1
CD80	3q13.33	0.496806	1.28269e-28	1.97692e-27	1
CDC20	1p34.2	4.10359	5.68643e-89	2.59088e-85	1
CDC34	19p13.3	0.801515	1.06324e-18	7.93996e-18	1
CDK2AP2	11q13.2	0.768893	1.92689e-20	1.64216e-19	1
CDR2L	17q25.1	0.684258	3.45299e-15	1.99285e-14	1
CDT1	16q24.3	2.43823	4.663e-65	1.04917e-62	1
CEBPE	14q11.2	0.0499821	1.67612e-06	4.52017e-06	1
CENPH	5q13.2	0.930445	4.90766e-34	1.12153e-32	1
CES4A	16q22.1	-0.476417	7.67965e-16	4.66277e-15	1
CGB7	19q13.33	-0.0679903	4.21915e-06	1.08684e-05	1
CLEC3B	3p21.31	-3.973	1.39072e-62	2.54733e-60	1
CLEC5A	7q34	1.21155	2.31835e-37	6.68545e-36	1
CLRN1-AS1	3q25.1	0.0181403	0.0206041	0.0319284	1
CNIH1	14q22.2	-0.353745	4.02256e-10	1.5313e-09	1
CNR1	6q15	-0.614998	2.24879e-19	1.77038e-18	1
COPS2	15q21.2	-0.478403	6.24646e-19	4.74637e-18	1
COPS7B	2q37.1	0.45255	2.21933e-18	1.627e-17	1
COQ4	9q34.11	-0.194493	0.00360591	0.0063526	1
CRB3	19p13.3	1.03378	3.88294e-17	2.59646e-16	1
CRYBA1	17q11.2	-0.0235026	0.0269947	0.0409931	1
CTSD	11p15.5	1.019	3.96385e-18	2.85031e-17	1
CTSK	1q21.3	-0.687627	2.84138e-06	7.47329e-06	1
CUTA	6p21.32	0.894131	3.22708e-31	6.05389e-30	1
CXCL2	4q13.3	-2.5652	1.31187e-49	9.0052e-48	1
CXCR2	2q35	-0.351567	5.76301e-12	2.55923e-11	1
CXXC5	5q31.2	-0.844916	1.13483e-15	6.7911e-15	1
CYB561	17q23.3	0.680301	1.08004e-10	4.32658e-10	1
CYGB	17q25.1	-1.26899	1.68684e-23	1.80892e-22	1
DECR2	16p13.3	0.2444	0.00105802	0.00202047	1
DEFB1	8p23.1	-0.720989	0.00198179	0.00362777	1
DEPTOR	8q24.12	-1.1737	4.70965e-16	2.90665e-15	1
DES	2q35	-1.66004	1.59838e-14	8.79144e-14	1
DHRS1	14q12	-0.298997	7.3357e-06	1.84277e-05	1
DHRS4-AS1	14q11.2	-0.43761	6.45218e-08	2.01925e-07	1
DHRS7B	17p11.2	-0.44481	9.36314e-17	6.08404e-16	1
DIO3OS	14q32.31	-0.581931	2.04655e-24	2.35469e-23	1
DIRAS1	19p13.3	1.1298	5.90006e-17	3.88892e-16	1
DRD1	5q35.2	-0.140911	3.26886e-07	9.52132e-07	1
EIF3M	11p13	0.2528	0.00032782	0.000670804	1
EMP1	12p13.1	-1.57479	6.01559e-26	7.70444e-25	1
EMP2	16p13.13	-0.250036	0.00956448	0.0157222	1
EPHA10	1p34.3	0.154969	0.0124903	0.0201057	1
EPHX3	19p13.12	0.410983	0.000417027	0.000841068	1
ETFA	15q24.2-q24.3	-0.344535	1.31141e-05	3.20103e-05	1
EXOSC8	13q13.3	0.195389	0.000644807	0.00126859	1
FAM166B	9p13.3	-0.707893	9.59665e-12	4.1912e-11	1
FAM43A	3q29	-0.892536	8.44795e-20	6.88723e-19	1
FAM63B	-	-0.928164	1.6656e-30	2.95719e-29	1
FAM66C	12p13.31	-0.229403	9.1291e-08	2.81139e-07	1
FAM72A	1q32.1	0.670379	4.57957e-44	2.10234e-42	1
FAM96B	16q22.1	0.606676	5.6359e-17	3.72153e-16	1
FBLIM1	1p36.21	0.783855	4.99238e-14	2.63308e-13	1
FBXO45	3q29	0.919916	2.06756e-32	4.222e-31	1
FCGR1B	1p11.2	0.217514	1.93925e-12	8.9657e-12	1
FEZF1	7q31.32	0.105916	0.00425215	0.00740909	1
FITM1	14q12	-0.161416	0.00655266	0.0110673	1
FKBP2	11q13.1	0.638694	2.24031e-06	5.96446e-06	1
FRRS1L	9q31.3	-0.111973	0.00130728	0.00246267	1
GAR1	4q25	0.668758	3.67235e-15	2.11498e-14	1
GATA5	20q13.33	0.222419	0.0006471	0.00127276	1
GEMIN8	Xp22.2	-0.262699	2.04138e-05	4.86933e-05	1
GLUD1P3	10q22.2	-0.335223	5.77732e-09	1.99152e-08	1
GLYATL2	11q12.1	0.514268	0.0292469	0.0441063	1
GNAI3	1p13.3	0.404411	4.07881e-16	2.52974e-15	1
GNAQ	9q21.2	-0.876757	9.39826e-28	1.37027e-26	1
GNAT1	3p21.31	0.0425876	0.000478317	0.000958158	1
GOLGA8O	15q13.3	-0.0296584	3.62454e-07	1.05145e-06	1
GORASP1	3p22.2	-0.276283	2.54035e-07	7.49156e-07	1
GPAA1	8q24.3	0.722847	2.43262e-18	1.77693e-17	1
GPCPD1	20p12.3	-0.783579	8.94046e-20	7.26761e-19	1
GPD1L	3p22.3	-1.92165	5.70767e-52	4.73906e-50	1
GPR146	7p22.3	-1.21358	1.12305e-46	6.19294e-45	1
GPR35	2q37.3	0.151072	2.20767e-06	5.88357e-06	1
GPR68	14q32.11	0.817225	1.00499e-18	7.5281e-18	1
GSTZ1	14q24.3	-0.192529	0.00358223	0.00631303	1
GUCY1B2	13q14.3	0.212324	4.96831e-11	2.04512e-10	1
H1FX-AS1	3q21.3	-0.157884	0.000395273	0.000799583	1
HAX1	1q21.3	0.668003	2.63711e-29	4.30079e-28	1
HHIP	4q31.21	-0.0692716	0.000577026	0.00114277	1
HIAT1	-	-0.171394	0.0103031	0.0168355	1
HIGD1A	3p22.1	-0.310301	1.78136e-06	4.79051e-06	1
HLA-F-AS1	6p22.1	-0.287467	6.11172e-11	2.50053e-10	1
HOXB8	17q21.32	-0.324547	0.00029204	0.000601575	1
HPGD	4q34.1	-0.894241	1.11802e-07	3.41106e-07	1
HSP90AA4P	4q35.2	0.0179981	0.00251472	0.00453772	1
HSPA6	1q23.3	1.01372	5.80716e-16	3.56408e-15	1
HSPB11	1p32.3	0.662867	6.76594e-24	7.48236e-23	1
HTRA2	2p13.1	0.342089	1.28015e-10	5.09239e-10	1
HYAL3	3p21.31	0.920073	8.63058e-30	1.45844e-28	1
IBA57	1q42.13	0.161328	0.00225603	0.00409707	1
ICAM2	17q23.3	-0.820995	2.52261e-19	1.97868e-18	1
IER3	6p21.33	0.546043	0.000676471	0.00132681	1
IFI30	19p13.11	0.330197	3.01574e-16	1.88484e-15	1
IFI44L	1p31.1	0.648009	2.48275e-05	5.86344e-05	1
IGF2	11p15.5	-2.52122	1.13839e-32	2.38199e-31	1
IGKV2-24	2p11.2	-0.737638	0.00497039	0.00856478	1
IL11	19q13.42	0.390146	7.47075e-12	3.28915e-11	1
IL19	1q32.1	0.0534121	0.0182199	0.0284697	1
IL27	16p12.1-p11.2	0.223289	1.25195e-12	5.88213e-12	1
IRF2	4q35.1	-0.257163	4.01487e-06	1.037e-05	1
ISG20	15q26.1	0.872837	2.2602e-19	1.77859e-18	1
ISOC1	5q23.3	-0.495929	5.16164e-11	2.12278e-10	1
ITGB1BP1	2p25.1	-0.581631	9.54555e-09	3.2303e-08	1
ITPA	20p13	0.883132	2.99886e-22	2.92425e-21	1
JDP2	14q24.3	-0.455265	2.40784e-08	7.84955e-08	1
KAT5	11q13.1	-0.259039	8.85597e-07	2.46544e-06	1
KBTBD3	11q22.3	-0.551292	4.42708e-40	1.54418e-38	1
KCNE2	21q22.11	0.130468	1.38561e-05	3.37311e-05	1
KCNJ9	1q23.2	0.0543358	2.01229e-05	4.80353e-05	1
KHDC1	6q13	0.524654	4.10822e-19	3.1692e-18	1
KIR3DX1	19q13.42	0.0273826	0.0104705	0.0170875	1
KLRF1	12p13.31	-0.308506	3.98778e-06	1.03023e-05	1
KRR1	12q21.2	-0.297805	8.23819e-07	2.29943e-06	1
KRT18P55	17q11.2	0.0126975	0.00191749	0.00351696	1
KRT7	12q13.13	1.19909	1.45737e-06	3.95748e-06	1
KRTAP2-3	17q21.2	0.121614	0.00641041	0.0108447	1
KRTAP5-6	11p15.5	0.0446591	5.13687e-09	1.7795e-08	1
LA16c-380H5.4	-	0.603586	3.19475e-09	1.12718e-08	1
LAMP1	13q34	0.242732	0.00106234	0.0020282	1
LAT	16q13	0.0703585	0.000755835	0.00147225	1
LEMD1	1q32.1	0.968024	1.13192e-16	7.31274e-16	1
LGI4	19q13.12	-1.20912	2.43274e-39	8.02472e-38	1
LINC00087	-	-0.477122	5.66535e-15	3.21905e-14	1
LINC00634	22q13.2	0.460712	1.33652e-34	3.1737e-33	1
LIPJ	10q23.31	-0.035917	0.0180825	0.0282709	1
LMF2	22q13.33	0.429178	1.81558e-08	5.98623e-08	1
LPCAT2	16q12.2	-0.911968	1.46094e-19	1.16728e-18	1
LRRC20	10q22.1	0.438951	3.08389e-06	8.07178e-06	1
LRRC24	8q24.3	0.00998953	0.000226475	0.000472876	1
LRRC45	17q25.3	1.17482	3.4409e-26	4.50021e-25	1
LXN	3q25.32	-0.300253	0.00208096	0.0037992	1
MANSC4	12p11.22	-0.0558565	0.000922637	0.0017759	1
MAP3K14	17q21.31	-0.238239	0.00338351	0.00598393	1
MCM8	20p12.3	0.585014	1.15144e-18	8.57578e-18	1
MED31	17p13.1	-0.097286	0.010537	0.0171868	1
MEX3A	1q22	2.52659	5.61731e-43	2.394e-41	1
MIR24-2	19p13.12	-1.29876	2.83602e-20	2.39068e-19	1
MLKL	16q22.3	0.230348	0.000230308	0.000480386	1
MNX1	7q36.3	0.384254	5.97932e-12	2.65174e-11	1
MPLKIP	7p14.1	0.440837	1.633e-21	1.50537e-20	1
MRPL12	17q25.3	1.65854	2.23762e-30	3.93635e-29	1
MRPS26	20p13	0.909273	4.47748e-20	3.71933e-19	1
MS4A15	11q12.2	0.255022	0.000177755	0.000376259	1
MSL3P1	2q37.1	0.386708	1.72758e-27	2.45881e-26	1
MT1DP	16q13	-0.375622	1.694e-06	4.565e-06	1
MT1G	16q13	0.970818	1.73676e-07	5.19701e-07	1
MTFR1L	1p36.11	-0.558294	1.62206e-34	3.83922e-33	1
MYC	8q24.21	-0.416356	0.00304493	0.00542276	1
NAA50	3q13.31	0.501941	2.38787e-14	1.2952e-13	1
NAGS	17q21.31	-0.174663	0.00937649	0.0154411	1
NAIP	5q13.2	-0.0308662	0.0300196	0.0451613	1
NANOGNB	12p13.31	0.0577817	3.48564e-05	8.08472e-05	1
NAPSA	19q13.33	-0.148722	0.00536271	0.00919214	1
NDUFB10	16p13.3	0.402713	1.39165e-06	3.78578e-06	1
NDUFB3	2q33.1	0.491571	8.43108e-15	4.7308e-14	1
NFIX	19p13.13	-0.420282	2.74162e-05	6.43975e-05	1
NODAL	10q22.1	-0.12375	9.30137e-09	3.15059e-08	1
NR2C2AP	19p13.11	1.03728	7.30613e-30	1.23864e-28	1
NR2F2	15q26.2	-0.507287	7.56658e-08	2.35085e-07	1
NUDT16L1	16p13.3	0.535554	8.4967e-13	4.04525e-12	1
OIP5	15q15.1	1.72171	1.32573e-68	3.92868e-66	1
OR5P3	11p15.4	-0.0201839	0.00295454	0.00527442	1
OXA1L	14q11.2	-0.240264	2.71151e-06	7.15208e-06	1
PDIA6	2p25.1	1.17334	3.10407e-34	7.19741e-33	1
PDK3	Xp22.11	0.882375	1.80203e-12	8.35567e-12	1
PDX1	13q12.2	0.217255	3.31771e-08	1.06763e-07	1
PDZD9	16p12.2	-0.11626	8.98897e-24	9.85408e-23	1
PGAM5	12q24.33	1.12264	8.59026e-39	2.73224e-37	1
PIH1D2	11q23.1	-0.327209	4.08503e-17	2.7251e-16	1
PKMYT1	16p13.3	2.26322	3.3148e-76	2.11973e-73	1
PLA2G2F	1p36.12	0.0170346	0.00628719	0.0106491	1
PLAC9	10q22.3	-3.0769	6.3213e-53	5.68917e-51	1
PLAGL1	6q24.2	-0.69836	4.1283e-12	1.85796e-11	1
PLET1	11q23.1	0.0749782	0.0242664	0.037158	1
PNLIPRP2	10q25.3	0.0554488	0.0296978	0.0447198	1
PNPLA4	Xp22.31	-0.952922	1.37115e-27	1.97071e-26	1
PPAPDC3	-	-0.790458	7.74417e-20	6.32761e-19	1
PPBP	4q13.3	-0.157926	0.0305678	0.0459103	1
PPIE	1p34.2	0.308938	1.97821e-10	7.74582e-10	1
PPIEL	1p34.3	-0.436842	4.0586e-13	1.98732e-12	1
PPP2R2D	10q26.3	-0.122104	0.00900932	0.0148842	1
PPP3CC	8p21.3	-0.438367	3.3237e-13	1.63914e-12	1
PRKCI	3q26.2	0.447626	1.44848e-07	4.36917e-07	1
PRKRIP1	7q22.1	0.416927	2.74878e-09	9.74926e-09	1
PROL1	-	-2.30481	2.3779e-17	1.61706e-16	1
PSMD9	12q24.31	0.1624	0.000207601	0.000435815	1
PSME3	17q21.31	0.304013	5.3374e-08	1.68367e-07	1
PTRHD1	2p23.3	0.413559	1.38034e-07	4.17157e-07	1
PYGO2	1q21.3	0.815899	3.17353e-35	7.86372e-34	1
RARRES2	7q36.1	-1.34452	4.71834e-15	2.69314e-14	1
RBM7	11q23.1-q23.2	-0.218949	5.574e-05	0.000126006	1
RBP4	10q23.33	-4.68777	1.32364e-50	9.88661e-49	1
RCAN2	6p12.3	-0.941098	5.78627e-22	5.50822e-21	1
RHBDL1	16p13.3	0.315058	3.28377e-06	8.57096e-06	1
RHOD	11q13.2	0.670421	1.72326e-11	7.39583e-11	1
RIMKLA	1p34.2	0.155393	0.00398636	0.00697767	1
RLN1	9p24.1	-0.0943825	7.84974e-05	0.000174104	1
RNF112	17p11.2	-0.0788496	0.00204624	0.00373843	1
RNF150	4q31.21	-1.31683	4.01297e-22	3.86454e-21	1
RNF181	2p11.2	0.441742	1.63556e-10	6.45267e-10	1
RNF24	20p13	0.497547	1.09734e-09	4.02719e-09	1
RP11-645C24.5	-	-0.256217	8.80796e-25	1.03698e-23	1
RPL31	2q11.2	-0.219445	0.0126307	0.0203164	1
RPS28	19p13.2	0.309763	0.00303479	0.00540643	1
RRAGB	Xp11.21	-0.362922	1.23186e-07	3.74178e-07	1
RRAS	19q13.33	-0.811376	1.38583e-11	5.98855e-11	1
RSPO1	1p34.3	-1.01157	1.05664e-12	4.99087e-12	1
S100A10	1q21.3	0.363196	0.00435216	0.00756961	1
S100A14	1q21.3	1.54122	1.14624e-08	3.85498e-08	1
S100A3	1q21.3	0.404774	2.7334e-05	6.42252e-05	1
S100B	21q22.3	-1.56791	3.73671e-12	1.68861e-11	1
SAP30	4q34.1	1.30421	8.93123e-41	3.29497e-39	1
SBSN	19q13.13	1.20542	1.7004e-13	8.58562e-13	1
SELENBP1	1q21.3	-1.15359	1.25819e-14	6.98249e-14	1
SEMA6B	19p13.3	-0.457127	2.18376e-06	5.82281e-06	1
SERPINB2	18q21.33-q22.1	0.469224	8.94222e-05	0.000196767	1
SETD9	5q11.2	-0.555881	7.23503e-19	5.46677e-18	1
SF3B5	6q24.2	0.608778	1.07182e-14	5.96731e-14	1
SH3GL3	15q25.2	0.309714	6.04925e-08	1.89833e-07	1
SHB	9p13.1	0.754306	1.32123e-17	9.1487e-17	1
SHBG	17p13.1	-0.046499	0.0185753	0.028989	1
SIRT4	12q24.31	-0.119187	0.00924903	0.0152498	1
SLC15A3	11q12.2	0.587951	3.16503e-08	1.02057e-07	1
SLC16A3	17q25.3	1.81772	5.06316e-40	1.75597e-38	1
SLC17A9	20q13.33	0.652852	3.91393e-13	1.91906e-12	1
SLC22A18AS	11p15.4	-0.157182	0.00273013	0.00489609	1
SLC50A1	1q22	1.39466	5.13912e-42	2.06985e-40	1
SLC52A1	17p13.2	0.262953	0.000148362	0.000317526	1
SLC7A2	8p22	-2.5268	9.27444e-53	8.18531e-51	1
SLC9A3R2	16p13.3	-0.454083	2.93538e-05	6.87052e-05	1
SMCO2	12p11.23	0.188404	2.5302e-17	1.71615e-16	1
SNORD3D	17p11.2	0.0626789	0.00880075	0.01457	1
SOHLH1	9q34.3	0.16475	0.00871459	0.0144365	1
SPDYA	2p23.2	0.0885878	0.000125959	0.00027225	1
SPSB1	1p36.22	0.323086	0.000307746	0.000632035	1
SPTSSB	3q26.1	-0.318003	0.0200592	0.0311422	1
SRSF7	2p22.1	0.217113	9.71341e-05	0.000212978	1
STC1	8p21.2	-0.393528	0.00757039	0.0126689	1
STK16	2q35	-0.113237	0.0300954	0.0452604	1
STMN3	20q13.33	-0.372606	0.00361014	0.00635913	1
STOML3	13q13.2	-0.0351282	2.99453e-06	7.85031e-06	1
STX12	1p35.3	-0.767171	9.1501e-31	1.65519e-29	1
SURF4	9q34.2	0.222888	2.98061e-05	6.9737e-05	1
TACO1	17q23.3	0.498616	4.34955e-17	2.89679e-16	1
TADA3	3p25.3	0.173302	0.00254739	0.00459279	1
TBX1	22q11.21	0.552281	5.62213e-06	1.42746e-05	1
TCEAL5	Xq22.1	-1.26943	5.40844e-31	9.93637e-30	1
TCEB1	-	0.986738	5.28697e-43	2.26451e-41	1
TEX38	1p33	-0.0391752	0.00078233	0.00152024	1
TIMM9	14q23.1	-0.135108	0.0157182	0.0248689	1
TIMP4	3p25.2	-3.97651	1.46839e-51	1.17892e-49	1
TMEM192	4q32.3	-0.800967	1.25882e-39	4.24065e-38	1
TMEM206	1q32.3	1.51884	1.54229e-60	2.37201e-58	1
TMEM65	8q24.13	0.798839	5.95709e-23	6.13725e-22	1
TMUB2	17q21	-0.244476	1.41214e-06	3.83981e-06	1
TNFRSF10D	8p21.3	-0.778963	1.82385e-14	9.98788e-14	1
TP53INP1	8q22.1	-0.388281	9.05348e-06	2.25225e-05	1
TRABD	22q13.33	1.15504	2.82376e-27	3.95717e-26	1
TRAF2	9q34.3	0.989262	2.2592e-26	2.97714e-25	1
TRAV13-2	14q11.2	0.180046	0.00410972	0.00717774	1
TRBV30	7q34	0.284939	1.49604e-05	3.62933e-05	1
TRIQK	8q22.1	-0.387878	1.0067e-06	2.78641e-06	1
TSACC	1q22	0.517759	4.6748e-25	5.61993e-24	1
TSPAN18	11p11.2	-0.453925	7.06305e-06	1.776e-05	1
UBALD2	17q25.1	0.974928	4.22965e-26	5.48455e-25	1
UBE2F	2q37.3	0.412824	2.22724e-17	1.51659e-16	1
UBE2I	16p13.3	0.390246	3.59771e-14	1.92169e-13	1
UBQLNL	11p15.4	-0.0725406	0.00540053	0.00925261	1
UNC5CL	6p21.1	0.159589	0.00602776	0.0102396	1
UQCR11	19p13.3	0.00988975	0.00442614	0.00768873	1
UQCRB	8q22.1	0.275525	1.0025e-05	2.47888e-05	1
UQCRC1	3p21.31	0.396343	2.3663e-08	7.72173e-08	1
USMG5	-	0.386266	6.7526e-07	1.9021e-06	1
UTS2R	17q25.3	-0.0623277	0.0038097	0.00668997	1
VDR	12q13.11	0.488423	9.1781e-05	0.000201738	1
VIMP	-	0.609213	9.19225e-21	8.03495e-20	1
WBP1L	10q24.32	-0.774609	3.14536e-33	6.8081e-32	1
WNT7B	22q13.31	0.520693	7.22137e-05	0.000160882	1
YOD1	1q32.1	0.642643	1.99784e-16	1.26888e-15	1
YWHAH	22q12.3	0.783938	1.54147e-27	2.20458e-26	1
ZNF222	19q13.31	-0.170981	0.000531012	0.00105721	1
ZNF302	19q13.11	-0.370194	1.02791e-07	3.15038e-07	1
ZNF774	15q26.1	-0.324625	1.54768e-09	5.61211e-09	1
ZNF80	3q13.31	0.071518	0.000115397	0.00025055	1
MAP3K1	5q11.2	-0.910657	2.96067e-15	1.71759e-14	1	71
MUC5B	11p15.5	1.57094	9.47601e-22	8.86779e-21	8	49
LRP2	2q31.1	-1.43181	2.43213e-14	1.31843e-13	5	33
MGAM	7q34	-0.0992959	0.00186987	0.00343723	2	29
GPR98	-	-0.59556	4.2808e-20	3.56244e-19	5	28
DNAH11	7p15.3	0.230745	9.81225e-09	3.31747e-08	3	26
HECTD4	12q24.13	-0.492468	8.42677e-15	4.72911e-14	2	25
TBX3	12q24.21	-1.3464	3.37772e-22	3.27878e-21	3	24
TEX15	8p12	0.128338	3.73318e-06	9.67745e-06	1	24
VPS13B	8q22.2	-0.308464	1.66011e-05	4.0002e-05	2	23
DNAH3	16p12.3	0.0653467	0.00112189	0.0021344	5	22
CHD6	20q12	-0.602207	4.11446e-12	1.85219e-11	4	22
AKAP9	7q21.2	-0.435134	9.74765e-07	2.70233e-06	3	22
DNAH10	12q24.31	0.0399718	0.000816429	0.00158216	3	22
DNAH7	2q32.3	-0.180627	3.53646e-23	3.7052e-22	3	22
PCNXL2	-	0.194378	0.00327361	0.00580055	3	22
FBN1	15q21.1	-1.06204	8.43094e-10	3.12305e-09	2	22
QSER1	11p13	0.330331	0.000201228	0.000423021	2	22
ZFHX3	16q22.2-q22.3	-0.432536	2.49684e-11	1.0558e-10	1	22
DNAH17	17q25.3	0.262012	1.98557e-05	4.7446e-05	8	21
KMT2D	12q13.12	-0.402272	3.26707e-07	9.51689e-07	7	21
SPHKAP	2q36.3	-0.436294	3.10487e-09	1.0961e-08	2	21
ANK3	10q21.2	-0.214528	0.00884772	0.014643	3	20
PTPRD	9p24.1-p23	0.160043	0.0208031	0.0322214	2	20
FAM157B	9q34.3	0.0120521	0.00874207	0.0144781	1	20
NBPF1	1p36.13	-0.309243	2.18553e-07	6.48454e-07	1	20
ANKRD30BL	2q21.2	0.0125555	0.0105668	0.0172312	5	19
CACNA1F	Xp11.23	-0.162146	4.66462e-15	2.66456e-14	4	19
PCNT	21q22.3	0.407268	6.76114e-10	2.52633e-09	2	18
TP53BP1	15q15.3	-0.414777	7.15922e-10	2.66851e-09	2	18
SMG1	16p12.3	-0.16972	0.0263663	0.0401141	7	17
GPR112	-	-0.0326682	7.70732e-08	2.39274e-07	4	17
C5orf42	-	-0.277457	1.99951e-05	4.77446e-05	2	17
CHD5	1p36.31	0.0788945	0.00146812	0.00274313	2	17
CHD8	14q11.2	-0.176395	0.00486979	0.00840334	1	17
NAV1	1q32.1	-0.34802	3.22799e-05	7.52303e-05	1	17
CHD7	8q12.2	0.648305	1.35084e-15	8.03623e-15	2	16
GRIK2	6q16.3	0.0761031	0.0127532	0.0204972	1	16
LPA	6q25.3-q26	-0.00548116	0.0332254	0.049573	1	16
BCORL1	Xq26.1	-0.14174	0.00841188	0.0139668	4	15
NLRC5	16q13	0.659708	2.12291e-11	9.03656e-11	2	15
KIF21B	1q32.1	0.310949	4.03131e-08	1.28749e-07	1	15
TRRAP	7q22.1	0.294128	2.01996e-05	4.81983e-05	1	15
AK9	6q21	-0.148983	0.00038168	0.000773741	5	14
TPR	1q31.1	0.244216	0.000426615	0.000859264	5	14
SRRM2	16p13.3	-0.441566	3.86159e-09	1.35237e-08	4	14
BPTF	17q24.2	-0.278085	0.000971935	0.00186488	3	14
CTNNA2	2p12	0.109833	0.0224454	0.0345569	2	14
DEPDC5	22q12.2-q12.3	0.0970275	0.0248528	0.0379826	2	14
FASN	17q25.3	-0.906661	8.43002e-08	2.60557e-07	2	14
WDR66	12q24.31	0.158929	9.4601e-05	0.000207698	2	14
HTT	4p16.3	-0.368865	1.62586e-09	5.88389e-09	1	14
RNF123	3p21.31	-0.21595	2.8565e-05	6.69448e-05	1	14
UGGT2	13q32.1	-0.206912	0.00034117	0.00069609	1	14
UGT1A6	2q37.1	0.102424	0.0230609	0.0354333	1	14
ZNF721	4p16.3	-0.410177	1.30094e-10	5.17055e-10	1	14
GOLGB1	3q13.33	-0.57131	3.32932e-13	1.64147e-12	5	13
SCN1A	2q24.3	0.0788231	0.00176924	0.00326427	4	13
COL4A5	Xq22.3	-0.850645	6.92827e-10	2.58613e-09	3	13
DNAJC13	3q22.1	-0.190801	0.00114873	0.00218159	3	13
VWA3A	16p12.2	-0.0536537	0.00142688	0.00267197	3	13
CCNB3	Xp11.22	0.166644	0.000689315	0.00135069	2	13
CDK5RAP2	9q33.2	-0.173604	0.00389397	0.00682807	2	13
NRK	Xq22.3	-0.285084	1.738e-06	4.67873e-06	2	13
NRXN3	14q24.3-q31.1	-0.187854	1.94789e-12	9.00221e-12	2	13
ANKHD1	5q31.3	-0.0978048	6.63047e-05	0.000148371	1	13
ATP2B3	Xq28	0.088045	0.004059	0.00709527	1	13
NUP214	9q34.13	-0.121196	0.00454072	0.00787539	1	13
PIEZO2	18p11.22-p11.21	-0.370035	8.68999e-06	2.16552e-05	1	13
TGS1	8q12.1	0.497671	2.86275e-12	1.30565e-11	1	13
C2orf16	2p23.3	-0.109856	3.53314e-05	8.19021e-05	5	12
ATXN2	12q24.12	-0.105398	0.00867054	0.0143662	4	12
CCDC168	13q33.1	0.0176798	1.23813e-06	3.38533e-06	4	12
MYO10	5p15.1	1.13408	1.16201e-26	1.55776e-25	4	12
SNRNP200	2q11.2	0.196176	0.00427834	0.00745098	4	12
ARHGAP35	19q13.32	-0.632272	7.10808e-16	4.32898e-15	3	12
BRINP3	1q31.1	0.403948	0.00264418	0.00475319	3	12
NLRP7	19q13.42	0.319479	3.86219e-06	9.99339e-06	3	12
ADAMTS20	12q12	0.0467048	0.0169344	0.0266175	2	12
BSN	3p21.31	-0.0712789	0.00394001	0.00690084	2	12
CRIPAK	4p16.3	-0.550959	9.45917e-16	5.69707e-15	2	12
LAMA5	20q13.33	-0.234437	0.0259229	0.0394921	2	12
MED13	17q23.2	-0.262261	0.000961162	0.00184556	2	12
PXDN	2p25.3	0.445849	0.00144593	0.00270527	2	12
ANKRD27	19q13.11	0.416347	5.24305e-09	1.81438e-08	1	12
LRRC41	1p34.1-p33	0.366045	5.16932e-12	2.30626e-11	1	12
NINL	20p11.21	0.39764	7.05745e-06	1.77483e-05	1	12
TRIP11	14q32.12	-0.492851	6.4978e-13	3.12295e-12	1	12
SAGE1	Xq26.3	0.0624707	0.0305668	0.0459103	6	11
ERBB4	2q34	-1.61174	2.19291e-42	9.03183e-41	5	11
RBMX	Xq26.3	0.129311	0.027137	0.0411937	4	11
DENND4B	1q21.3	0.400443	3.39094e-12	1.53769e-11	3	11
NCKAP5	2q21.2	-0.179175	0.0149588	0.0237539	3	11
HTATSF1	Xq26.3	0.399649	5.42487e-09	1.87446e-08	2	11
MAGEA12	Xq28	0.5033	0.000138089	0.00029676	2	11
PTPRT	20q12-q13.11	-1.37677	9.26435e-32	1.81356e-30	2	11
RASGRF1	15q25.1	0.551935	2.71747e-13	1.34911e-12	2	11
RIMS2	8q22.3	0.300325	3.85627e-07	1.11672e-06	2	11
SALL1	16q12.1	-0.101817	0.0174032	0.0272955	2	11
STK31	7p15.3	0.111552	0.000106505	0.000232433	2	11
ADCY7	16q12.1	0.463693	4.65044e-10	1.76131e-09	1	11
C1orf101	-	-0.113739	5.67635e-07	1.61227e-06	1	11
DOCK5	8p21.2	0.216201	0.00937917	0.0154448	1	11
EFCAB5	17q11.2	0.0273235	3.21341e-05	7.49144e-05	1	11
GGT3P	22q11.21	-0.0336608	0.00122221	0.00231102	1	11
GLI3	7p14.1	-1.25833	1.26313e-27	1.82413e-26	1	11
KIAA1549L	11p13	0.910907	3.48244e-15	2.00942e-14	1	11
MCF2L	13q34	-0.353997	2.51588e-07	7.42361e-07	1	11
MEFV	16p13.3	0.0648518	0.00924076	0.0152369	1	11
PTPN22	1p13.2	0.460821	1.65153e-10	6.51287e-10	1	11
RGS22	8q22.2	-0.731646	3.69508e-31	6.88929e-30	1	11
RREB1	6p24.3	-0.366016	1.2197e-12	5.73506e-12	1	11
SIN3A	15q24.2	-0.271647	5.39498e-06	1.37237e-05	1	11
TLR8	Xp22.2	0.26321	0.000771429	0.00150054	1	11
CREBBP	16p13.3	-0.333191	1.40985e-06	3.83386e-06	7	10
ACTN2	1q43	0.277927	0.0160319	0.0253113	5	10
TCF20	22q13.2	0.543505	2.13109e-10	8.31762e-10	5	10
TNRC6C	17q25.3	-0.525104	9.10841e-13	4.32462e-12	4	10
CEP170	1q43	0.470099	9.72566e-10	3.58479e-09	3	10
KIAA0825	5q15	-0.270131	2.41136e-16	1.5196e-15	3	10
TMEM131	2q11.2	-0.168292	0.00195208	0.00357717	3	10
ANKRD20A4	9q13	-0.0270448	9.99059e-05	0.000218739	2	10
COL16A1	1p35.2	-0.338754	0.0114154	0.0184962	2	10
DOCK2	5q35.1	0.235859	0.00660083	0.0111461	2	10
MYO5C	15q21.2	-1.00164	4.54855e-24	5.09197e-23	2	10
PCDHGB1	5q31	0.188723	0.000296525	0.00061033	2	10
THADA	2p21	0.126877	0.010567	0.0172312	2	10
TRPV2	17p11.2	0.276213	0.00475911	0.00822326	2	10
ADAM21	14q24.2	0.0880819	0.00049462	0.000988724	1	10
AKR1CL1	-	-0.0262274	0.000912255	0.00175758	1	10
LRPPRC	2p21	0.348806	1.13224e-06	3.11097e-06	1	10
SPTBN4	19q13.13	-0.259285	6.55602e-19	4.97122e-18	1	10
DIDO1	20q13.33	-0.140834	0.00909032	0.0150071	5	9
TNIK	3q26.2-q26.31	-0.355977	0.000232256	0.000484143	5	9
MROH5	8q24.3	0.0135736	0.0134571	0.021526	4	9
SPAG17	1p12	-0.196455	3.29505e-05	7.67049e-05	4	9
CNTNAP1	17q21.2	-0.329952	2.43824e-09	8.69268e-09	3	9
HEATR1	1q43	0.624935	1.75196e-12	8.13283e-12	3	9
PLXNB3	Xq28	0.323704	0.000381218	0.000772911	3	9
QRICH2	17q25.1	0.461305	2.87738e-07	8.43089e-07	3	9
TSC2	16p13.3	-0.213298	7.00009e-05	0.000156258	3	9
TTC3	21q22.13	-0.385923	4.10633e-07	1.18574e-06	3	9
ANKRD28	3p25.1	-0.188665	0.00288682	0.00516237	2	9
BPIFB4	20q11.21	0.10369	0.00666351	0.0112473	2	9
CCDC155	19q13.33	0.0498769	0.000807392	0.00156606	2	9
CEP290	12q21.32	-0.415272	7.32604e-13	3.50622e-12	2	9
DDX42	17q23.3	-0.166269	0.000921799	0.00177447	2	9
FAM208A	3p14.3	-0.447487	1.15696e-11	5.02938e-11	2	9
KCND2	7q31.31	-0.517511	1.12611e-11	4.9017e-11	2	9
MAGEE1	Xq13.3	-0.316594	8.98788e-07	2.50009e-06	2	9
MDGA2	14q21.3	0.115018	3.4157e-13	1.68292e-12	2	9
NUP210L	1q21.3	0.0493715	0.00874028	0.0144764	2	9
PEX1	7q21.2	-0.282402	7.68077e-07	2.15109e-06	2	9
WDR33	2q14.3	0.102415	0.00595235	0.01012	2	9
ASCC2	22q12.2	0.350296	1.49804e-12	6.99327e-12	1	9
BAZ2A	12q13.3	-0.47148	2.89341e-12	1.3188e-11	1	9
CDK18	1q32.1	0.640647	2.21252e-12	1.01749e-11	1	9
CHD1L	1q21.1	0.740907	3.32422e-19	2.58574e-18	1	9
DAPK1	9q21.33	0.79037	5.33983e-13	2.58516e-12	1	9
HIP1	7q11.23	-0.526352	2.64702e-12	1.21013e-11	1	9
JAK3	19p13.11	0.682902	7.20897e-13	3.45155e-12	1	9
KCNA4	11p14.1	-0.117841	1.234e-10	4.91686e-10	1	9
KRT86	12q13	1.16869	7.33692e-13	3.51097e-12	1	9
MBTPS2	Xp22.12	-0.182447	0.000610496	0.00120538	1	9
PCDHB2	5q31.3	0.476983	7.37401e-05	0.000164122	1	9
POLR2B	4q12	0.283075	0.000220693	0.000461545	1	9
POTEH	22q11.1	-0.0123532	0.000611102	0.00120645	1	9
SCAF4	21q22.11	0.394337	2.86659e-12	1.30723e-11	1	9
SPTBN5	15q21	-0.135925	0.0210193	0.0325206	1	9
TBX22	Xq21.1	-0.0216361	0.00249177	0.00449896	1	9
VPRBP	-	-0.16012	0.00279494	0.00500618	1	9
ZMYM2	13q12.11	-0.252741	0.000181951	0.000384627	1	9
LHCGR	2p16.3	-0.30855	1.59784e-17	1.10014e-16	3	8
OTOG	11p15.1	0.0154541	2.91472e-06	7.65152e-06	3	8
SSC5D	19q13.42	-0.901924	1.69464e-16	1.08216e-15	3	8
AMPH	7p14.1	-0.454757	4.41136e-07	1.26979e-06	2	8
APBA2	15q13.1	1.11259	3.13882e-28	4.69767e-27	2	8
ATHL1	-	-0.325784	0.0210856	0.0326163	2	8
ATP1A1	1p13.1	0.531266	7.81275e-07	2.18603e-06	2	8
CASK	Xp11.4	0.289755	7.74621e-05	0.000171976	2	8
CILP	15q22.31	-1.29219	1.15692e-09	4.23986e-09	2	8
CLSTN2	3q23	-2.63893	1.01065e-52	8.87665e-51	2	8
FBXL18	7p22.1	0.175769	0.000552242	0.00109678	2	8
GLDC	9p24.1	0.782523	1.93889e-11	8.28227e-11	2	8
KAT6A	8p11.21	-0.338842	9.74041e-05	0.000213505	2	8
MDGA1	6p21.2	-0.101571	0.0112579	0.0182605	2	8
NUMA1	11q13.4	-0.610635	3.01354e-16	1.88379e-15	2	8
PRDM1	6q21	0.298697	0.000533761	0.00106233	2	8
SGIP1	1p31.3	0.10825	0.0154606	0.0244932	2	8
SLC26A9	1q32.1	0.413486	1.49759e-07	4.51097e-07	2	8
SORL1	11q24.1	-0.82361	7.98097e-12	3.50489e-11	2	8
SPG11	15q21.1	-0.821045	9.83581e-30	1.65214e-28	2	8
SYBU	8q23.2	-1.61736	8.46493e-53	7.50722e-51	2	8
UBE3B	12q24.11	-0.37025	1.99107e-16	1.26481e-15	2	8
WDR6	3p21.31	-0.26401	0.00348486	0.00615124	2	8
ZNF841	19q13.41	-0.205492	0.00359927	0.00634183	2	8
ASMTL	Xp22.3 and Yp11.3	-0.504533	1.16061e-09	4.25212e-09	2	8
ALMS1P	-	-0.124013	2.17793e-06	5.8077e-06	1	8
ASAP1	8q24.21-q24.22	0.340004	1.05105e-05	2.59153e-05	1	8
CARD9	9q34.3	0.399037	5.78416e-10	2.17264e-09	1	8
CCDC175	14q23.1	-0.00628364	0.0328603	0.0490684	1	8
CCNL2	1p36.33	-0.295286	0.000253744	0.000526283	1	8
CD1E	1q23.1	0.430789	1.0163e-05	2.51079e-05	1	8
CDK19	6q21	0.450399	1.92906e-07	5.74744e-07	1	8
CROT	7q21.12	-0.904404	2.69389e-18	1.96228e-17	1	8
CWH43	4p11	0.504279	3.74037e-09	1.31219e-08	1	8
CYP4F11	19p13.12	-0.513012	5.45652e-08	1.71902e-07	1	8
DNAJC11	1p36.31	0.181813	0.00146322	0.00273482	1	8
DZANK1	20p11.23	-0.230355	0.000313683	0.000643503	1	8
GRIN2C	17q25.1	0.158232	0.00293058	0.00523344	1	8
HLA-DRB6	6p21.32	0.604455	0.000285915	0.000589457	1	8
HSD17B4	5q23.1	-1.06865	1.13799e-37	3.36142e-36	1	8
ITGA4	2q31.3	0.240802	0.00401017	0.00701596	1	8
MAGEC1	Xq27.2	0.118569	0.0191384	0.0297978	1	8
MEP1A	6p12.3	0.030546	0.0151374	0.0240155	1	8
NCKAP1L	12q13.13-q13.2	0.270223	0.00849017	0.0140929	1	8
NRIP1	21q11.2-q21.1	-1.1038	4.97366e-20	4.11555e-19	1	8
PMS2	7p22.1	-0.152971	0.00852816	0.0141502	1	8
POLG	15q26.1	0.208213	0.00116101	0.00220342	1	8
RBP3	10q11.22	-0.0110549	0.00417517	0.00728401	1	8
SLC1A6	19p13.12	0.342242	9.69329e-07	2.68828e-06	1	8
SLITRK6	13q31.1	-0.582996	0.000162718	0.000346339	1	8
TCERG1	5q32	0.177687	0.00291533	0.0052085	1	8
THBS3	1q22	0.33579	0.00164749	0.00305401	1	8
ZNF619	3p22.1	-0.344429	4.72159e-10	1.78677e-09	1	8
KCNU1	8p11.23	-0.0430123	1.25977e-07	3.82274e-07	4	7
KIF5C	2q23.1-q23.2	-0.716096	9.8432e-13	4.65833e-12	4	7
MYO15A	17p11.2	-0.0278156	0.0190389	0.0296592	4	7
UBN2	7q34	-0.181988	0.00154294	0.00287292	4	7
ACTN4	19q13.2	0.417606	7.11571e-06	1.78899e-05	3	7
ARHGEF2	1q22	0.63636	1.46983e-13	7.44619e-13	3	7
KANSL3	2q11.2	-0.335994	1.76481e-09	6.36904e-09	3	7
MAN2A1	5q21.3	-0.455694	1.79396e-10	7.05166e-10	3	7
NLRP13	19q13.43	-0.130227	2.78903e-13	1.38332e-12	3	7
USP36	17q25.3	0.313299	1.95336e-06	5.23338e-06	3	7
VANGL2	1q23.2	1.04217	3.98057e-11	1.65554e-10	3	7
ABCG4	11q23.3	0.0159653	0.00184467	0.00339433	2	7
APAF1	12q23.1	-0.149067	0.0183871	0.0287102	2	7
ASCC3	6q16.3	0.324373	1.29423e-05	3.16122e-05	2	7
CDH10	5p14.2-p14.1	-0.0378965	0.0174705	0.0273881	2	7
DGCR14	-	0.419135	5.30115e-15	3.01634e-14	2	7
FBXW10	17p11.2	0.0691607	8.02878e-05	0.000177848	2	7
FMN1	15q13.3	-0.461801	5.53238e-13	2.67589e-12	2	7
FXR1	3q26.33	0.192488	0.000416708	0.000840471	2	7
LILRB3	19q13.42	0.138055	0.00234596	0.0042517	2	7
MGAT5B	17q25.2	0.325981	1.02622e-07	3.14572e-07	2	7
VAC14	16q22.1-q22.2	0.367466	1.88237e-16	1.19805e-15	2	7
WDR93	15q26.1	-0.403257	4.0485e-26	5.27028e-25	2	7
ZC3H11A	1q32.1	-0.141869	0.019119	0.0297714	2	7
ZNF236	18q22-q23	-0.160543	0.00268028	0.00481262	2	7
ZNF541	19q13.33	-0.150592	0.00139851	0.00262233	2	7
ABCE1	4q31.21	0.382481	2.19351e-08	7.17909e-08	1	7
ACAD10	12q24.12	-0.191461	2.16763e-05	5.1526e-05	1	7
AFF4	5q31.1	-0.777644	5.73304e-18	4.07427e-17	1	7
AP4E1	15q21.2	-0.21311	8.32278e-06	2.07727e-05	1	7
CCDC18	1p22.1	0.577343	2.15076e-25	2.6467e-24	1	7
CHRNB4	15q25.1	0.114349	1.13022e-07	3.44626e-07	1	7
CPT1A	11q13.3	-0.652929	5.63155e-12	2.50451e-11	1	7
CPT1C	19q13.33	0.159044	0.0023506	0.00425947	1	7
CTBS	1p22.3	-0.250567	5.02642e-06	1.28318e-05	1	7
CTNNA1	5q31.2	-0.360851	9.46281e-10	3.49073e-09	1	7
CUL3	2q36.2	-0.238266	1.5546e-05	3.76212e-05	1	7
EDC4	16q22.1	0.134701	0.0287785	0.0434467	1	7
FAM120C	Xp11.22	-0.151334	0.00736771	0.0123541	1	7
FBXO21	12q24.22	-0.23188	0.000391161	0.000791793	1	7
GPR142	17q25.1	-0.0539633	6.26792e-05	0.000140716	1	7
HERC6	4q22.1	0.28763	0.010098	0.0165299	1	7
HLA-DRB5	6p21.32	0.57199	0.00141709	0.00265499	1	7
HTR2C	Xq23	0.061949	0.0102348	0.0167329	1	7
ITK	5q33.3	0.310633	2.11879e-05	5.04243e-05	1	7
KBTBD4	11p11.2	-0.262155	6.10724e-07	1.72819e-06	1	7
MAGEL2	15q11.2	-0.0839874	0.00527113	0.00904877	1	7
NAA25	12q24.13	0.169244	0.0054464	0.00932375	1	7
NCAN	19p12	0.56133	4.20859e-05	9.66624e-05	1	7
OPA1	3q29	0.167556	0.00911406	0.0150422	1	7
PGBD5	1q42.13	1.0527	1.56195e-20	1.34091e-19	1	7
PIAS2	18q21.1	0.0913046	0.0279718	0.0423417	1	7
PIGG	4p16.3	-0.330517	9.35811e-10	3.45351e-09	1	7
PLCZ1	12p12.3	-0.226883	1.0011e-19	8.09633e-19	1	7
PRB2	12p13.2	0.0622244	0.000690985	0.00135382	1	7
PRKCG	19q13.42	0.0195275	0.00149115	0.00278244	1	7
PTPRA	20p13	-0.370671	4.26319e-13	2.08358e-12	1	7
RGS12	4p16.3	-0.314585	1.04878e-08	3.54029e-08	1	7
RPS6KA6	Xq21.1	-0.226754	0.000844577	0.0016341	1	7
SLC15A5	12p12.3	-0.12522	3.23798e-10	1.24354e-09	1	7
SLC38A9	5q11.2	-0.161706	1.89792e-05	4.54619e-05	1	7
SLC9C2	1q25.1	0.0106974	0.0133374	0.0213532	1	7
SMC1B	22q13.31	0.832692	1.68306e-24	1.94507e-23	1	7
SREBF2	22q13.2	0.25495	0.00187867	0.00345131	1	7
SRPR	-	0.223332	9.26145e-05	0.000203521	1	7
TGFBI	5q31.1	0.654764	3.89676e-06	1.00786e-05	1	7
TMTC2	12q21.31	-0.269517	0.00138708	0.00260292	1	7
UBA6	4q13.2	0.223228	0.000637907	0.00125603	1	7
UPK3B	7q11.23	0.191667	0.00239075	0.00432793	1	7
VNN2	6q23.2	0.267119	0.00580944	0.00989412	1	7
ZNF429	19p12	-0.439481	1.06129e-13	5.44617e-13	1	7
ZNF473	19q13.33	0.254604	8.83284e-07	2.45938e-06	1	7
ZNF790	19q13.12	-0.111068	0.0231663	0.0355781	1	7
ZSCAN21	7q22.1	-0.104709	0.0108775	0.0176916	1	7
ANKRD30A	10p11.21	-2.08226	1.9921e-32	4.07474e-31	5	6
AARS	16q22.1	0.63427	5.71414e-20	4.70691e-19	4	6
ATXN1	6p22.3	-0.306593	1.44492e-06	3.92454e-06	3	6
KIF27	9q21.32	-0.237703	4.37617e-06	1.1249e-05	3	6
RALGAPA1	14q13.2	-0.550445	1.04159e-19	8.41075e-19	3	6
SIGLEC6	19q13.41	-0.147645	8.45902e-07	2.35853e-06	3	6
SUV420H1	-	-0.177963	0.00423102	0.00737511	3	6
THBS4	5q14.1	-1.53198	6.06332e-15	3.43714e-14	3	6
ACSF2	17q21.33	-1.03108	9.01803e-27	1.22105e-25	2	6
DZIP3	3q13.13	-0.484002	2.92867e-20	2.46536e-19	2	6
ELN	7q11.23	-0.660283	0.00373776	0.00657218	2	6
GABRG1	4p12	-0.0373719	8.74086e-10	3.23358e-09	2	6
GPR111	-	0.0393869	5.14772e-06	1.31231e-05	2	6
IGDCC3	15q22.31	-0.374939	2.80485e-15	1.63109e-14	2	6
IGSF9B	11q25	-0.341724	1.93312e-16	1.22928e-15	2	6
ITLN2	1q23.3	0.0999973	0.00181493	0.00334415	2	6
IWS1	2q14.3	0.31207	6.75118e-10	2.52287e-09	2	6
MAGEB4	Xp21.2	0.351025	6.48154e-08	2.02757e-07	2	6
MAP10	1q42.2	0.296771	2.19123e-06	5.84146e-06	2	6
MLC1	22q13.33	0.611165	2.2564e-05	5.35072e-05	2	6
OCSTAMP	20q13.12	0.0672841	0.0119412	0.0192813	2	6
PABPC3	13q12.13	0.194629	8.44495e-09	2.87251e-08	2	6
POLR2A	17p13.1	-0.293406	1.40511e-05	3.41829e-05	2	6
PTPRN2	7q36.3	-0.778834	9.85733e-18	6.89635e-17	2	6
RBM27	5q32	-0.195737	7.86213e-05	0.000174369	2	6
SF3B3	16q22.1	0.647616	5.0771e-20	4.19828e-19	2	6
SLC39A12	10p12.33	0.19845	0.000149656	0.000320033	2	6
SMCR8	17p11.2	-0.381837	2.05085e-06	5.47965e-06	2	6
ZBTB5	9p13.2	0.269835	0.000213602	0.00044764	2	6
ZNF800	7q31.33	-0.266574	1.02082e-05	2.52128e-05	2	6
ADCY1	7p12.3	-0.750628	4.99209e-12	2.2302e-11	1	6
ANAPC5	12q24.31	0.144796	0.00198083	0.00362637	1	6
AVIL	12q14.1	-0.127956	0.00963245	0.0158276	1	6
C3orf30	3q13.32	0.0532445	5.984e-07	1.69464e-06	1	6
CCDC13	3p22.1	-0.0441719	0.0002797	0.000577492	1	6
CPEB2	4p15.32	-1.06731	1.9864e-33	4.36433e-32	1	6
DCTN2	12q13.3	-0.105656	0.0106915	0.0174138	1	6
DHX57	2p22.1	0.222873	5.60303e-05	0.000126607	1	6
DUSP16	12p13.2	-0.601649	2.79694e-08	9.05886e-08	1	6
EHBP1L1	11q13.1	0.317406	0.0015306	0.0028511	1	6
ELF1	13q14.11	-0.629674	1.81607e-12	8.41759e-12	1	6
FAM193A	4p16.3	-0.175648	0.000755645	0.00147196	1	6
FAM83B	6p12.1	0.623801	4.18235e-08	1.33397e-07	1	6
FCRL2	1q23.1	0.211505	9.23699e-05	0.000202996	1	6
GSDMC	8q24.21	1.21459	1.00117e-23	1.09227e-22	1	6
HCN4	15q24.1	0.0684524	0.00524392	0.00900375	1	6
HS3ST4	16p12.1	-0.720131	3.32637e-12	1.51048e-11	1	6
ICOSLG	21q22.3	0.154637	5.91881e-06	1.49945e-05	1	6
KCNJ15	21q22.13-q22.2	0.201289	0.000857881	0.00165782	1	6
KIAA1468	18q21.33	-0.223628	0.000691812	0.00135536	1	6
KRT2	12q13.13	0.121564	7.05913e-05	0.000157489	1	6
LAMP2	Xq24	0.291644	0.000143212	0.000307208	1	6
LGI1	10q23.33	-0.0446838	0.0173255	0.02719	1	6
MAGEC2	Xq27.2	0.33726	0.00130235	0.00245378	1	6
MR1	1q25.3	-0.482129	2.32646e-11	9.86498e-11	1	6
MSH5	6p21.33	0.177691	8.07422e-06	2.01759e-05	1	6
MUM1L1	Xq22.3	-0.47662	8.95032e-13	4.25234e-12	1	6
MYBPC3	11p11.2	0.0286198	0.0164002	0.0258424	1	6
NXPE1	11q23.2	-0.00847742	0.0269487	0.0409249	1	6
OR2L13	1q44	-0.297823	2.99888e-21	2.7144e-20	1	6
OR2T8	1q44	-0.0223052	0.0155261	0.0245884	1	6
PTPN12	7q11.23	0.254064	0.000122888	0.000265942	1	6
RAB11FIP5	2p13.2	-0.30599	2.35375e-07	6.9672e-07	1	6
RABEP1	17p13.2	-1.33661	1.14685e-45	5.91271e-44	1	6
RAD50	5q31.1	-0.674396	6.39745e-25	7.61054e-24	1	6
RIN2	20p11.23	-0.398361	4.13979e-07	1.19483e-06	1	6
RNF219	13q31.1	0.141804	0.0112371	0.0182277	1	6
SCUBE2	11p15.4	-3.25987	1.56877e-57	1.97861e-55	1	6
SLC5A6	2p23.3	0.822573	2.13535e-11	9.08315e-11	1	6
SLC6A10P	16p11.2	0.127234	0.00627165	0.0106252	1	6
SLC9A8	20q13.13	-0.283098	3.95538e-08	1.26412e-07	1	6
SLTM	15q22.1	-0.198287	7.65759e-05	0.000170153	1	6
SPECC1	17p11.2	0.291688	0.000153332	0.000327547	1	6
SPPL2C	17q21.31	-0.00648992	0.0149567	0.0237517	1	6
SRBD1	2p21	-0.196354	0.000104495	0.000228307	1	6
SYTL4	Xq22.1	-1.2398	3.89541e-47	2.23251e-45	1	6
TCEB3B	-	0.027435	0.0175317	0.027478	1	6
TCHHL1	1q21.3	0.0394052	0.000256885	0.000532529	1	6
TGM7	15q15.2	0.0248528	0.00172929	0.00319476	1	6
TRPC3	4q27	0.0373257	0.0217688	0.0335919	1	6
UBA7	3p21.31	-0.477216	6.55107e-07	1.84834e-06	1	6
UBE3C	7q36.3	0.174137	0.00388976	0.00682102	1	6
UFL1	6q16.1	-0.246169	0.000465429	0.000933728	1	6
VEZF1	17q22	-0.695476	2.57032e-15	1.50117e-14	1	6
ZFAND4	10q11.22	-0.389903	8.24802e-13	3.93045e-12	1	6
ZNF324	19q13.43	-0.108281	0.0303386	0.0455867	1	6
ZNF572	8q24.13	0.254599	0.000110992	0.000241546	1	6
TMPRSS15	21q21.1	0.035165	0.0261118	0.0397599	4	5
FAM98A	2p22.3	0.56696	2.3983e-24	2.74641e-23	3	5
MAPK6	15q21.2	0.257903	0.000268522	0.000555357	3	5
OGDHL	10q11.23	0.370943	1.33466e-08	4.45741e-08	3	5
PPIP5K2	5q21.1	-0.29446	7.78469e-07	2.17885e-06	3	5
UCK2	1q24.1	0.993743	1.54775e-24	1.79381e-23	3	5
ALG13	Xq23	-0.316033	4.26735e-10	1.6211e-09	2	5
ARHGAP30	1q23.3	0.529027	5.35157e-07	1.5249e-06	2	5
B3GALT5	21q22.2	-0.664062	8.00365e-08	2.47925e-07	2	5
BCKDHA	19q13.2	-0.143701	0.00263475	0.00473741	2	5
BRPF1	3p25.3	0.262287	3.60036e-06	9.34907e-06	2	5
CCDC132	-	-0.297679	6.70104e-09	2.2969e-08	2	5
CCDC170	6q25.1	-1.789	1.49531e-69	4.69861e-67	2	5
DPYSL5	2p23.3	0.431314	7.96614e-06	1.99222e-05	2	5
GPR108	19p13.3	-0.205939	0.00104505	0.00199676	2	5
GRIK3	1p34.3	-1.16333	7.6253e-20	6.23329e-19	2	5
HOXB3	17q21.32	-0.71346	2.83481e-13	1.40526e-12	2	5
IDI1	10p15.3	0.386909	0.000521387	0.00103884	2	5
INPP4B	4q31.21	-1.50025	2.44226e-36	6.56976e-35	2	5
MED15	22q11.21	0.252206	1.59454e-07	4.78915e-07	2	5
MUC7	4q13.3	-0.304765	0.0132782	0.0212659	2	5
PAX5	9p13.2	0.404097	6.56974e-07	1.85303e-06	2	5
PFKP	10p15.2	1.37186	6.65314e-25	7.9044e-24	2	5
PGS1	17q25.3	0.27364	5.77674e-06	1.46529e-05	2	5
POU2F2	19q13.2	0.356885	1.00922e-06	2.79232e-06	2	5
RAD21L1	20p13	0.0495597	0.00118859	0.002252	2	5
SLC23A3	2q35	0.0952593	0.000674064	0.00132237	2	5
SMYD2	1q32.3	0.73291	5.98751e-24	6.64975e-23	2	5
THNSL1	10p12.1	0.419367	7.17282e-08	2.23346e-07	2	5
TP53BP2	1q41	1.04611	2.40687e-22	2.36789e-21	2	5
VRTN	14q24.3	0.193252	0.000628911	0.00123915	2	5
ZNF496	1q44	0.401285	7.74049e-08	2.40263e-07	2	5
ZNF560	19p13.2	0.160096	0.002976	0.0053096	2	5
ABCB6	2q35	0.129134	0.0090127	0.0148884	1	5
ACSL6	5q31.1	0.348034	1.35287e-07	4.0923e-07	1	5
ACSM2B	16p12.3	-0.0316418	5.16033e-09	1.78712e-08	1	5
ALG10B	12q12	-0.343403	7.38958e-10	2.751e-09	1	5
ARAP1	11q13.4	-0.238999	0.00117637	0.00223037	1	5
ATP2C1	3q22.1	0.409543	1.21284e-10	4.83519e-10	1	5
ATRNL1	10q25.3	-0.191307	0.000245749	0.000510576	1	5
BCAR3	1p22.1	-0.770533	4.28388e-16	2.65376e-15	1	5
BEND2	Xp22.13	-0.00590121	0.0170187	0.0267431	1	5
BFSP1	20p12.1	0.302007	1.29261e-07	3.9178e-07	1	5
BMS1	10q11.21	0.366101	6.03986e-10	2.26588e-09	1	5
C12orf36	-	0.0964217	0.00472826	0.00817499	1	5
C19orf44	19p13.11	-0.104929	0.0285999	0.0432003	1	5
CC2D1B	1p32.3	0.318986	1.14609e-11	4.9833e-11	1	5
CD4	12p13.31	0.308983	0.0104315	0.0170277	1	5
CSAD	12q13.13	-1.28467	6.80723e-35	1.64866e-33	1	5
CSRP2BP	-	-0.125192	0.0157907	0.0249727	1	5
CYP4B1	1p33	-2.09788	6.52885e-31	1.19346e-29	1	5
DGAT2L6	Xq13.1	-0.0228194	4.11284e-06	1.06103e-05	1	5
DHRS4	14q11.2	-0.283605	0.000126759	0.000273836	1	5
DNAJB12	10q22.1	-0.153957	0.00477388	0.00824644	1	5
DSG4	18q12.1	-0.02389	0.00164383	0.0030477	1	5
ELOVL5	6p12.1	-1.60432	3.45656e-38	1.06143e-36	1	5
ERAP2	5q15	-0.454088	0.00517094	0.00888683	1	5
FAM114A2	5q33.2	-0.5756	2.44239e-40	8.68538e-39	1	5
FCHO1	19p13.11	0.507531	7.85992e-11	3.1861e-10	1	5
FOXRED1	11q24.2	0.251581	7.83405e-06	1.96066e-05	1	5
GRIA2	4q32.1	-0.144958	0.00518834	0.00891338	1	5
GUSBP1	5p14.3	-0.121809	0.0174224	0.0273209	1	5
HHLA1	8q24.22	0.00398894	0.0322444	0.0482217	1	5
IQCG	3q29	0.739221	4.55881e-16	2.81737e-15	1	5
KAL1	-	-0.932749	2.33887e-20	1.98398e-19	1	5
KEL	7q34	0.104167	0.0268894	0.0408502	1	5
KIR3DL2	19q13.42	0.0529993	0.000163676	0.000348237	1	5
LGSN	6q12	0.0680803	0.0049007	0.00845028	1	5
LONRF2	2q11.2	-0.832777	2.77401e-21	2.519e-20	1	5
MYO3B	2q31.1	0.377174	1.77889e-11	7.6265e-11	1	5
NDST3	4q26	0.0795622	8.27713e-05	0.000183105	1	5
NUTM1	15q14	0.0173096	0.00702105	0.0118103	1	5
NXF3	Xq22.1	-0.0415628	0.000966612	0.00185554	1	5
OTC	Xp11.4	-0.147765	1.23503e-10	4.9204e-10	1	5
PDCD6IP	3p22.3	-0.463351	1.73865e-14	9.53274e-14	1	5
PRPF38B	1p13.3	0.181439	0.00399576	0.0069931	1	5
REL	2p16.1	-0.148817	0.0241601	0.0370093	1	5
RGL3	19p13.2	-0.57343	8.92e-10	3.29684e-09	1	5
RIPK3	14q12	-0.52848	6.92816e-14	3.61017e-13	1	5
RTN2	19q13.32	-0.590339	4.43998e-09	1.54573e-08	1	5
SCUBE1	22q13.2	-0.488321	2.08622e-15	1.2257e-14	1	5
SEC63	6q21	0.17042	0.0116563	0.0188497	1	5
SEL1L	14q31	-0.62155	1.5537e-14	8.55343e-14	1	5
SIRPB1	20p13	0.188716	0.000120388	0.000260794	1	5
SLC2A13	12q12	-0.157573	0.00196239	0.00359446	1	5
SLC4A10	2q24.2	-0.0330684	0.0211598	0.0327172	1	5
SOCS6	18q22.2	-0.380918	7.57826e-06	1.90069e-05	1	5
SORCS2	4p16.1	-0.279128	0.00024053	0.000500374	1	5
STON2	14q31.1	-0.865788	9.19832e-18	6.44767e-17	1	5
TMC3	15q25.1	-0.16129	7.6211e-07	2.13503e-06	1	5
TMC8	17q25.3	0.460185	1.25361e-05	3.06569e-05	1	5
ZFAT	8q24.22	0.222662	8.14934e-08	2.52309e-07	1	5
ZMYM6	1p34.3	-0.122434	4.94915e-05	0.000112635	1	5
ZNF12	7p22.1	-0.287584	9.34006e-06	2.3199e-05	1	5
ZNF486	19p12	-0.599583	1.64324e-08	5.43819e-08	1	5
ZNF528	19q13.41	-0.558839	3.23271e-14	1.73436e-13	1	5
ZNF626	19p12	-0.344725	6.77035e-05	0.00015138	1	5
ZNF737	19p12	-0.545637	2.75864e-08	8.94355e-08	1	5
ZSWIM3	20q13.12	0.102033	0.0316592	0.0474088	1	5
TTF2	1p13.1	0.531616	4.82261e-17	3.19956e-16	4	4
AQR	15q14	-0.363839	1.94105e-10	7.60765e-10	3	4
C16orf62	-	-0.281926	4.11369e-08	1.31323e-07	3	4
GOLGA8G	15q13.1	-0.00542459	0.0202876	0.0314728	3	4
IL6ST	5q11.2	-2.36366	1.75209e-65	4.09382e-63	3	4
KCNV1	8q23.2	0.0756714	6.68784e-05	0.000149581	3	4
TSR1	17p13.3	0.19746	0.000759786	0.00147931	3	4
UGT2B15	4q13.2	-0.863982	8.64247e-14	4.46834e-13	3	4
USP1	1p31.3	0.919159	2.34254e-17	1.59361e-16	3	4
ZNF780A	19q13.2	-0.309816	1.20383e-07	3.66029e-07	3	4
AVPR1B	1q32.1	0.0307391	1.49977e-06	4.06745e-06	2	4
BRD9	5p15.33	0.179719	0.00100264	0.00192115	2	4
BSDC1	1p35.1	-0.238563	2.60615e-06	6.88813e-06	2	4
CDRT1	17p12	0.0249828	0.000270693	0.000559752	2	4
DCST2	1q21.3	-0.1459	0.0128132	0.0205898	2	4
EPHB4	7q22.1	0.51357	6.66228e-09	2.28448e-08	2	4
ESRRG	1q41	-0.225057	0.00204432	0.0037351	2	4
FBXL7	5p15.1	-1.15674	1.85914e-27	2.64296e-26	2	4
FMNL1	17q21.31	0.386694	1.3917e-05	3.38703e-05	2	4
FNDC7	1p13.3	0.0379649	0.016726	0.0263148	2	4
GHRHR	7p14.3	0.120307	0.00429613	0.00747929	2	4
GMEB1	1p35.3	0.153909	0.00206919	0.00377885	2	4
GSE1	16q24.1	-0.600136	6.99414e-14	3.64195e-13	2	4
GUCY2D	17p13.1	-0.0993666	3.48464e-05	8.08292e-05	2	4
INTS2	17q23.2	-0.134344	0.0244336	0.0373968	2	4
KIRREL2	19q13.12	0.296392	1.00463e-07	3.08212e-07	2	4
MMS22L	6q16.1	0.485778	6.6751e-17	4.3721e-16	2	4
MN1	22q12.1	-0.438954	2.85011e-06	7.49433e-06	2	4
NANOS3	19p13.13	0.289879	3.21376e-08	1.03564e-07	2	4
PARP15	3q21.1	0.147844	0.0308625	0.0463129	2	4
PLEKHG4B	5p15.33	0.878017	6.06238e-16	3.71634e-15	2	4
RASSF5	1q32.1	0.22857	0.0190995	0.0297479	2	4
RGSL1	1q25.3	0.00877625	0.00318051	0.00564766	2	4
SALL2	14q11.2	-1.01468	2.68555e-19	2.0979e-18	2	4
2019-09-01	16p11.2	0.289589	0.00173253	0.00320006	2	4
SLC34A1	5q35.3	0.0244154	0.00010958	0.000238745	2	4
SLC45A4	8q24.3	0.431252	9.41683e-11	3.78981e-10	2	4
SLC6A8	Xq28	0.840013	1.13843e-15	6.80927e-15	2	4
SLC9A4	2q12.1	0.0520327	0.00014396	0.000308631	2	4
SPTLC1	9q22.31	-0.279797	9.92826e-05	0.000217427	2	4
STAT3	17q21.2	-0.190609	0.00572294	0.00976004	2	4
SYDE2	1p22.3	-0.393733	3.10912e-09	1.09749e-08	2	4
TRIM73	7q11.23	-0.0212865	0.00013298	0.00028637	2	4
TTC25	17q21.2	-0.355507	2.08439e-13	1.04408e-12	2	4
TXNDC16	14q22.1	-0.406695	9.26974e-06	2.30353e-05	2	4
ZIC3	Xq26.3	0.0635214	0.0068585	0.011555	2	4
ZNF417	19q13.43	-0.306614	9.00846e-07	2.50559e-06	2	4
AADAC	3q25.1	-1.08663	2.19866e-14	1.1956e-13	1	4
ACOT11	1p32.3	0.135507	0.000295773	0.000608919	1	4
ACTR8	3p21.1	-0.247717	1.50356e-07	4.52744e-07	1	4
ADAMTS15	11q24.3	-2.32417	2.55614e-54	2.47796e-52	1	4
AGL	1p21.2	-0.604409	6.07047e-11	2.48421e-10	1	4
ALAS1	3p21.2	0.204763	7.82032e-05	0.000173494	1	4
ANKRD34C	15q25.1	-0.026308	2.89715e-05	6.78451e-05	1	4
ANKZF1	2q35	0.212479	0.00126592	0.00238847	1	4
ANO10	3p22.1-p21.33	-0.23819	9.40721e-05	0.000206599	1	4
AOAH	7p14.2	0.234858	0.0179892	0.0281359	1	4
AREL1	14q24.3	0.27796	7.84846e-07	2.19518e-06	1	4
ARSE	Xp22.33	0.473871	5.36352e-08	1.69147e-07	1	4
ASAP3	1p36.12	-0.223957	0.00354562	0.00625183	1	4
ATP13A3	3q29	0.411921	1.12079e-06	3.08183e-06	1	4
BCAS2	1p13.2	0.299821	1.04564e-05	2.57891e-05	1	4
CARS2	13q34	0.494648	8.91711e-13	4.23821e-12	1	4
CD200R1L	3q13.2	0.0122919	0.0180898	0.0282786	1	4
CNTROB	17p13.1	0.161803	0.0160361	0.0253168	1	4
CPD	17q11.2	-0.681404	1.10104e-12	5.19319e-12	1	4
CREM	10p11.21	0.17211	0.000308907	0.000634311	1	4
CTSE	1q32.1	0.144274	0.0111988	0.0181719	1	4
CXADR	21q21.1	0.92647	6.94262e-10	2.59069e-09	1	4
DDX21	10q22.1	0.446163	6.35421e-07	1.79544e-06	1	4
DGKE	17q22	-0.249148	3.11409e-08	1.00468e-07	1	4
EMC2	8q23.1	0.294743	2.34777e-07	6.95065e-07	1	4
FAM117B	2q33.2	0.257604	0.000592539	0.00117177	1	4
FAM149B1	10q22.2	-0.209027	2.69436e-06	7.10891e-06	1	4
FCAR	19q13.42	0.0886801	1.63186e-05	3.93786e-05	1	4
FRS3	6p21.1	0.120036	0.0304523	0.0457519	1	4
FXYD5	19q13.12	0.938051	3.23019e-14	1.73326e-13	1	4
GGT5	22q11.23	-0.410208	9.97692e-05	0.000218466	1	4
GPR37	7q31.33	0.776596	8.43872e-16	5.10271e-15	1	4
GPR42	19q13.12	-0.0137607	0.00528251	0.00906661	1	4
GRB14	2q24.3	0.545277	1.08531e-05	2.67186e-05	1	4
HEPHL1	11q21	0.203883	8.00211e-05	0.000177322	1	4
HHIPL1	14q32	0.257432	2.3874e-06	6.33754e-06	1	4
HTRA1	10q26.13	-1.14083	9.23931e-16	5.57018e-15	1	4
IKZF1	7p12.2	0.337161	0.000149431	0.000319626	1	4
KLHL23	2q31.1	0.52961	3.90789e-09	1.36793e-08	1	4
MFSD6	2q32.2	-0.22325	0.0231455	0.0355507	1	4
MMAA	4q31.21	-0.242968	6.63211e-10	2.4804e-09	1	4
MMP2	16q12.2	-0.668164	3.95148e-06	1.02128e-05	1	4
NCR2	6p21.1	0.0406254	0.000461097	0.000925648	1	4
NDUFV1	11q13.2	0.290406	0.000607551	0.00119976	1	4
NRD1	-	0.377039	5.76883e-15	3.2758e-14	1	4
NSUN4	1p33	0.149846	0.00153936	0.00286654	1	4
NUMBL	19q13.2	0.342578	8.59934e-06	2.14381e-05	1	4
PGD	1p36.22	0.245399	0.00229414	0.00416275	1	4
PIGA	Xp22.2	0.208838	0.0014209	0.00266158	1	4
PPP1R3F	Xp11.23	0.141836	0.00905679	0.0149552	1	4
PRSS53	16p11.2	0.156577	6.19648e-08	1.94206e-07	1	4
PTCD3	2p11.2	0.168962	0.00136768	0.00256883	1	4
PTDSS1	8q22.1	0.998245	2.55283e-33	5.5619e-32	1	4
R3HCC1L	10q24.2	-0.156966	0.00748259	0.012534	1	4
RAD18	3p25.3	0.289113	4.5846e-05	0.000104764	1	4
RBPJL	20q13.12	0.0379613	1.24362e-06	3.39905e-06	1	4
RCBTB1	13q14.2	-0.294952	2.18193e-05	5.18524e-05	1	4
RGR	10q23.1	0.270326	3.97579e-08	1.2702e-07	1	4
RNF220	1p34.1	0.441344	8.17649e-16	4.95483e-15	1	4
RPGRIP1	14q11.2	-0.045148	0.0273693	0.0415256	1	4
SAMD3	6q23.1	0.11493	4.4528e-05	0.000101963	1	4
SERPINA5	14q32.13	-1.89361	1.34652e-23	1.45381e-22	1	4
SGCZ	8p22	-0.0833028	0.000692423	0.00135649	1	4
SKIV2L2	-	-0.453022	9.13163e-16	5.50799e-15	1	4
SLC16A5	17q25.1	-0.533542	5.76662e-09	1.98821e-08	1	4
SLC22A10	11q12.3	-0.0208639	5.14916e-08	1.62753e-07	1	4
SLC25A43	Xq24	0.159606	0.0196301	0.0305202	1	4
SLC6A17	1p13.3	0.602677	5.71609e-14	3.00002e-13	1	4
SPRED2	2p14	-0.680541	1.88418e-12	8.71772e-12	1	4
SRP68	17q25.1	0.231194	9.82706e-07	2.72331e-06	1	4
SYNGAP1	6p21.32	-0.1805	0.0030081	0.00536267	1	4
TATDN1	8q24.13	0.444821	4.12355e-11	1.71247e-10	1	4
TFCP2	12q13.12-q13.13	-0.28691	5.23844e-06	1.33413e-05	1	4
TIA1	2p13.3	0.211785	0.00814039	0.0135444	1	4
TMEM87A	15q15.1	-0.385284	4.19265e-06	1.0804e-05	1	4
TRA2B	3q27.2	0.25908	1.48035e-08	4.92504e-08	1	4
TRIT1	1p34.2	0.593467	1.9599e-15	1.15409e-14	1	4
TRNAU1AP	1p35.3	0.222632	1.56335e-06	4.23012e-06	1	4
USP42	7p22.1	0.115996	0.0245202	0.037523	1	4
ZNF583	19q13.43	-0.184834	8.00068e-11	3.24028e-10	1	4
ZNF782	9q22.33	-0.165441	0.000621277	0.00122561	1	4
ITIH1	3p21.1	0.0174578	0.00488929	0.0084338	5	3
EPHB3	3q27.1	1.55861	2.79999e-14	1.5102e-13	4	3
CA9	9p13.3	2.28106	5.05802e-26	6.52388e-25	3	3
FURIN	15q26.1	0.483021	1.24895e-06	3.41286e-06	3	3
MTHFR	1p36.22	-0.425255	1.72995e-13	8.72396e-13	3	3
NPHP1	2q13	-0.278804	3.83105e-19	2.96228e-18	3	3
ALPP	2q37.1	0.103229	0.0004632	0.000929614	2	3
AP2A2	11p15.5	-0.1471	0.00192219	0.00352505	2	3
AWAT1	Xq13.1	-0.0188663	0.00529068	0.0090802	2	3
CHORDC1	11q14.3	0.525439	4.49436e-16	2.77943e-15	2	3
CLCN3	4q33	-0.52534	3.8871e-11	1.6187e-10	2	3
CLUAP1	16p13.3	-0.194018	2.99387e-05	7.00383e-05	2	3
CTR9	11p15.4	-0.36104	1.21424e-09	4.43746e-09	2	3
CYP2D6	22q13.2	0.10482	0.0113684	0.0184259	2	3
CYTIP	2q24.1	0.48632	1.63333e-05	3.94088e-05	2	3
FAM73B	-	-0.192932	0.000622443	0.00122751	2	3
FBXL13	7q22.1	0.278638	0.000472425	0.000947032	2	3
FYB	-	0.44428	0.000115331	0.000250435	2	3
GDAP1	8q21.11	-0.31958	0.000378318	0.000767415	2	3
HLA-F	6p22.1	1.05612	1.03081e-13	5.29346e-13	2	3
KIAA1191	5q35.2	-0.273691	1.10179e-06	3.03233e-06	2	3
KRT85	12q13.13	0.11109	0.00167958	0.0031097	2	3
LRRC48	-	-0.610195	9.96144e-20	8.05981e-19	2	3
MAGEA11	Xq28	0.152749	0.0055207	0.00943986	2	3
MALRD1	10p12.31	-0.113471	1.75284e-20	1.49768e-19	2	3
MED1	17q12	-0.240468	0.00140882	0.00264031	2	3
MX2	21q22.3	0.608369	2.28332e-10	8.88893e-10	2	3
OR10Q1	11q12.1	0.0304706	0.0293159	0.0441994	2	3
PHACTR4	1p35.3	0.155435	0.025269	0.0385685	2	3
PLOD2	3q24	0.548636	2.67305e-05	6.28963e-05	2	3
SHCBP1L	1q25.3	0.0165312	0.00114432	0.00217393	2	3
STK38L	12p11.23	0.424602	0.000130198	0.000280777	2	3
TTC24	1q22	0.175929	4.96229e-06	1.26743e-05	2	3
WASL	7q31.32	-0.229912	0.000164242	0.00034936	2	3
ZNF689	16p11.2	-0.637726	2.36401e-11	1.00172e-10	2	3
ZNF71	19q13.4	0.179034	0.000111212	0.000241982	2	3
ZNF81	Xp11.23	-0.106099	0.0298385	0.0449112	2	3
ZNF876P	4p16.3	-0.141888	1.10918e-05	2.72823e-05	2	3
AADACL4	1p36.21	-0.00936894	0.00253333	0.00456811	1	3
ACAP1	17p13.1	0.309524	0.000616373	0.00121626	1	3
ACOX2	3p14.3	-1.62709	2.02328e-50	1.48388e-48	1	3
AGTR2	Xq23	-0.0297226	0.000798193	0.00154904	1	3
AHCYL1	1p13.3	-0.462076	1.72978e-15	1.02189e-14	1	3
ANKRD34B	5q14.1	0.108058	6.10982e-06	1.54601e-05	1	3
ATP5F1	-	0.236601	2.18979e-06	5.83806e-06	1	3
B4GALNT1	12q13.3	0.710313	1.34113e-16	8.62155e-16	1	3
BDKRB1	14q32.2	-0.131624	3.05307e-05	7.1382e-05	1	3
BIN2	12q13.13	0.575675	1.82345e-09	6.57156e-09	1	3
BRAP	12q24.12	-0.151314	0.0001217	0.000263482	1	3
C11orf58	11p15.2	-0.1601	0.0018483	0.00340048	1	3
C12orf56	12q14.2	0.197695	1.28303e-07	3.88976e-07	1	3
C4orf29	-	-0.159322	0.00055492	0.00110174	1	3
C5orf45	-	-0.456002	1.05353e-15	6.32325e-15	1	3
C8orf31	8q24.3	0.294471	0.000143719	0.000308168	1	3
CACNB1	17q12	0.201821	0.00255469	0.00460413	1	3
CAMK1D	10p13	0.382039	9.65681e-05	0.000211826	1	3
CCDC79	-	-0.0085301	0.00760397	0.0127175	1	3
CCR1	3p21.31	0.674478	1.32126e-07	4.00098e-07	1	3
CD300A	17q25.1	0.393079	4.7426e-05	0.000108205	1	3
CD44	11p13	0.314427	0.00497033	0.00856478	1	3
CD8B	2p11.2	0.427156	6.67035e-05	0.000149208	1	3
CEACAM4	19q13.2	0.100373	0.00130323	0.00245531	1	3
CES1P1	16q12.2	-0.258975	2.02871e-14	1.10698e-13	1	3
CHSY1	15q26.3	0.204065	0.0335372	0.0499992	1	3
CLEC17A	19p13.12	0.188533	0.00102593	0.00196228	1	3
CPB1	3q24	-2.00352	1.09319e-21	1.01936e-20	1	3
CPNE5	6p21.2	0.470636	4.70161e-07	1.34844e-06	1	3
CPSF4	7q22.1	0.330086	2.69445e-09	9.56587e-09	1	3
CRLF3	17q11.2	0.187082	0.000853148	0.00164946	1	3
CTSL	9q21.33	0.32983	0.000964413	0.00185151	1	3
CTSV	9q22.33	1.2753	6.81682e-22	6.45217e-21	1	3
DDX20	1p13.2	0.160504	0.00182929	0.00336875	1	3
DEGS1	1q42.11	0.259725	0.00121922	0.00230597	1	3
DNAJC6	1p31.3	0.517624	2.63434e-10	1.01912e-09	1	3
DRC1	2p23.3	-0.0672688	1.4501e-07	4.37371e-07	1	3
EAPP	14q13.1	-0.535503	2.65824e-19	2.07836e-18	1	3
ERCC4	16p13.12	-0.140278	0.00513759	0.00883494	1	3
ETAA1	2p14	-0.13033	0.014851	0.0235941	1	3
EXD2	14q24.1	-0.332129	1.3238e-09	4.82573e-09	1	3
FAM178A	-	-0.232884	7.22418e-05	0.000160928	1	3
FAM184B	4p15.32-p15.31	-0.155871	9.31139e-09	3.15369e-08	1	3
FAM219A	9p13.3	0.342602	1.19098e-08	3.99586e-08	1	3
FAM86B3P	8p23.1	-0.271635	1.08692e-06	2.99368e-06	1	3
FBXW4	10q24.32	-0.567627	7.98867e-18	5.62463e-17	1	3
FEZF2	3p14.2	-0.116015	3.99971e-06	1.03323e-05	1	3
FOLR4	-	0.06514	0.00195259	0.00357791	1	3
FTCD	21q22.3	0.309025	1.05594e-09	3.8819e-09	1	3
GALNT18	11p15.4	0.508453	7.19101e-09	2.4593e-08	1	3
GLB1L2	11q25	0.33984	0.00370463	0.00651644	1	3
GOLGA8T	15q13.2	-0.0295451	3.37426e-12	1.53032e-11	1	3
GPR162	12p13	-0.470833	6.65527e-11	2.7156e-10	1	3
GPR173	Xp11.22	0.18667	0.0168969	0.0265665	1	3
HSF5	17q22	0.0211266	0.0159828	0.0252447	1	3
IL37	2q14.1	0.0974547	0.0119945	0.0193597	1	3
KCNS2	8q22.2	-0.0372024	0.0262855	0.0400061	1	3
KHK	2p23.3	0.365208	3.08246e-07	8.99997e-07	1	3
KLK15	19q13.33	0.0181023	0.00216992	0.00394936	1	3
KRBA1	7q36.1	0.157521	0.0169629	0.0266588	1	3
LDHC	11p15.1	0.326747	4.99776e-07	1.42978e-06	1	3
LILRA5	19q13.42	0.282589	0.000119054	0.000258045	1	3
LIN28B	6q16.3-q21	0.143692	9.08907e-06	2.26064e-05	1	3
LMCD1	3p25.3	-0.697616	2.69287e-13	1.33745e-12	1	3
LRIT2	10q23.1	0.00737136	0.0187073	0.0291789	1	3
LRRC37A	17q21.31	-0.0305352	0.031146	0.0467036	1	3
LRRC8D	1p22.2	0.878412	4.64877e-19	3.56882e-18	1	3
MAGEA4	Xq28	0.951981	2.57089e-07	7.57488e-07	1	3
MOAP1	14q32.12	-0.766452	1.93293e-30	3.4185e-29	1	3
MOSPD2	Xp22.2	-0.227545	5.21781e-05	0.000118409	1	3
NECAP2	1p36.13	0.149484	0.0057515	0.00980364	1	3
NF2	22q12.2	0.309672	1.38234e-08	4.61034e-08	1	3
NTSR2	2p25.1	0.112153	0.0221035	0.0340636	1	3
OR9A4	7q34	0.0154547	0.00046765	0.000937926	1	3
PANX3	11q24.2	0.043227	0.0010148	0.00194303	1	3
POLR1D	13q12.2	0.217031	7.28198e-05	0.000162163	1	3
POMT1	9q34.13	-0.195108	0.000332912	0.000680307	1	3
PROSC	-	-0.251881	0.000420622	0.000847944	1	3
PRPF40B	12q13.12	-0.103702	0.0108589	0.0176661	1	3
QSOX2	9q34.3	0.629228	1.3688e-21	1.26792e-20	1	3
R3HDML	20q13.12	0.119357	0.00254126	0.00458196	1	3
RAB30	11q14.1	-1.29633	1.10671e-50	8.38657e-49	1	3
RAB42	1p35.3	0.400812	8.97677e-06	2.23393e-05	1	3
RBM24	6p22.3	-0.610432	5.48723e-11	2.25211e-10	1	3
RPA4	Xq21.33	0.0431156	0.00409444	0.00715208	1	3
RPE65	1p31.3	-0.131579	0.000439776	0.000884795	1	3
RPL18A	19p13.11	0.450941	1.53369e-05	3.71424e-05	1	3
SDCBP2	20p13	0.423132	1.78881e-06	4.80984e-06	1	3
SGSH	17q25.3	-0.19613	0.00194331	0.00356145	1	3
SLAMF1	1q23.3	0.369662	2.26724e-06	6.03307e-06	1	3
SLC44A2	19p13.2	0.407332	2.3098e-06	6.14095e-06	1	3
SLC45A3	1q32.1	0.812502	5.06776e-14	2.67129e-13	1	3
SPDYE2B	7q22.1	0.0209209	0.00176485	0.00325699	1	3
SULT1E1	4q13.3	0.15654	0.029652	0.0446617	1	3
SUOX	12q13.2	-0.758825	3.35097e-36	8.94164e-35	1	3
SYK	9q22.2	0.476095	2.53141e-06	6.70225e-06	1	3
SYNPO2L	10q22.2	-0.262713	7.9404e-05	0.000176061	1	3
TACR2	10q22.1	0.0896595	0.00572819	0.00976806	1	3
TAPT1	4p15.32	-0.758459	4.72125e-33	1.0117e-31	1	3
TBC1D22B	6p21.2	0.577878	2.17471e-19	1.71465e-18	1	3
TBCK	4q24	-0.51895	3.16749e-25	3.85236e-24	1	3
TBX20	7p14.2	0.190534	9.82846e-07	2.72349e-06	1	3
TCHP	12q24.11	0.180722	8.18745e-05	0.000181198	1	3
TFDP3	Xq26.2	-0.160726	6.58193e-05	0.000147321	1	3
TMEM38A	19p13.11	0.97361	2.05612e-16	1.30408e-15	1	3
TMEM39A	3q13.33	0.307334	5.31557e-08	1.67693e-07	1	3
TNPO2	19p13.13	0.276916	4.83091e-07	1.384e-06	1	3
TOM1	22q12.3	0.139684	0.0210974	0.0326307	1	3
TRAT1	3q13.13	0.343695	5.59898e-07	1.59104e-06	1	3
TRIM17	1q42.13	0.179535	0.0205547	0.0318613	1	3
TRIM43	2q11.1	0.182947	1.33822e-06	3.64697e-06	1	3
UBASH3A	21q22.3	0.337824	6.24877e-07	1.7666e-06	1	3
UBE3A	15q11.2	-0.361548	3.24283e-09	1.14336e-08	1	3
UGT2B17	4q13.2	-0.143361	0.0242286	0.0371064	1	3
UNC50	2q11.2	-0.146853	0.000901712	0.00173856	1	3
URI1	19q12	0.348935	4.50529e-08	1.43359e-07	1	3
USP20	9q34.2	-0.200478	0.00110552	0.00210511	1	3
WDR63	1p22.3	-0.107323	2.87738e-10	1.10891e-09	1	3
XRCC6	22q13.2	0.416731	2.98532e-17	2.01472e-16	1	3
ZC3HC1	7q32.2	0.250426	2.99613e-09	1.05966e-08	1	3
ZFP92	Xq28	-0.0808722	0.0247074	0.0377763	1	3
ZNF329	19q13.43	-0.462955	2.37784e-11	1.00723e-10	1	3
ZNF543	19q13.43	-0.193623	0.00109047	0.00207853	1	3
ZNF564	19p13.2	-0.0586622	0.00102338	0.00195812	1	3
ZNF776	19q13.43	-0.425832	1.55494e-08	5.15625e-08	1	3
HELB	12q14.3	0.11497	0.0187836	0.029289	3	2
ACADSB	10q26.13	-1.98425	4.96591e-46	2.6195e-44	2	2
AGAP5	10q22.2	-0.0289964	0.00675452	0.0113935	2	2
AKAP8	19p13.12	0.153711	0.00308599	0.00549132	2	2
ALOX15	17p13.2	-0.305426	0.00944656	0.0155438	2	2
APPBP2	17q23.2	-0.572997	1.09994e-21	1.0254e-20	2	2
BID	22q11.21	0.655057	7.27935e-23	7.44688e-22	2	2
CASQ1	1q23.2	-0.409983	2.33803e-05	5.53653e-05	2	2
CLOCK	4q12	-0.208932	0.00149011	0.00278094	2	2
CRTC1	19p13.11	-0.174908	0.00166267	0.00308012	2	2
CSNK1E	22q13.1	0.187439	0.00145754	0.00272531	2	2
DYRK4	12p13.32	0.39455	2.60571e-08	8.46659e-08	2	2
FAM46D	Xq21.1	0.0272447	0.000942945	0.00181249	2	2
FIG4	6q21	-0.122917	0.0319983	0.0478813	2	2
KDM4E	11q21	-0.0303957	0.0180756	0.0282624	2	2
KLHDC3	6p21.1	0.717318	6.54277e-21	5.77863e-20	2	2
MFN1	3q26.33	0.218063	0.00122504	0.00231626	2	2
MPP7	10p12.1	-1.27242	1.86077e-28	2.83194e-27	2	2
NEK4	3p21.1	-0.185833	0.00122203	0.0023108	2	2
OGFOD1	16q13	0.246173	1.13554e-08	3.82078e-08	2	2
OR10H1	19p13.1	-0.0254159	0.000773512	0.00150443	2	2
P2RX2	12q24.33	0.209201	0.00426141	0.00742452	2	2
RAB14	9q33.2	-0.444948	8.07242e-12	3.54249e-11	2	2
RBM23	14q11.2	-0.162165	0.00431994	0.00751788	2	2
SERPINB3	18q21.33	0.402023	0.000451704	0.000907641	2	2
SH3GL2	9p22.2	0.303137	7.53224e-06	1.88967e-05	2	2
SLC10A3	Xq28	0.636109	8.50816e-18	5.97653e-17	2	2
SNX32	11q13.1	0.13652	0.00187106	0.00343908	2	2
TJAP1	6p21.1	0.246166	1.73261e-05	4.17021e-05	2	2
UNK	17q25.3	0.171724	0.0168946	0.0265641	2	2
YTHDF2	1p35.3	0.263091	2.61225e-06	6.90376e-06	2	2
ZFP14	19q13.13	-0.380252	5.61976e-10	2.11437e-09	2	2
ZNF716	7p11.2	0.06277	0.00186201	0.00342382	2	2
ZNF773	19q13.43	-0.101727	0.00839103	0.0139334	2	2
ZNRF1	16q23.1	0.490936	2.1952e-22	2.16491e-21	2	2
ABI1	10p12.1	0.259335	9.99851e-05	0.000218899	1	2
ACAA1	3p22.2	-0.221433	0.00149144	0.00278286	1	2
ADRB3	8p11.23	-0.112145	0.000429375	0.000864586	1	2
ALPPL2	2q37.1	0.0299659	6.94097e-05	0.000155005	1	2
AMN1	12p11.21	-0.152807	0.00404487	0.00707159	1	2
ANXA7	10q22.2	-0.221355	0.000125764	0.000271843	1	2
ARMC12	6p21.31	0.139993	2.60846e-05	6.14757e-05	1	2
ASF1A	6q22.31	0.459337	9.72973e-11	3.91099e-10	1	2
AZGP1	7q22.1	-1.79596	2.91192e-09	1.03078e-08	1	2
BAG3	10q26.11	-0.397199	3.39828e-07	9.87936e-07	1	2
C12orf42	12q23.2	0.0204023	0.00551112	0.00942625	1	2
C16orf78	16q12.1	-0.0187579	8.98798e-07	2.50009e-06	1	2
C17orf102	17q12	0.0242671	0.00021969	0.000459604	1	2
C1orf106	-	1.55425	4.34251e-34	9.98641e-33	1	2
C1orf111	-	-0.1822	7.26974e-07	2.04083e-06	1	2
C1orf94	1p35.1	0.2178	6.04972e-06	1.53144e-05	1	2
CACNG5	17q24.2	0.0383863	0.000178179	0.000377111	1	2
CAGE1	6p24.3	0.0672138	1.6819e-09	6.08126e-09	1	2
CASP9	1p36.21	-0.185325	2.11968e-05	5.04389e-05	1	2
CCNYL2	10q11.21	0.164395	3.78019e-06	9.79421e-06	1	2
CD8A	2p11.2	0.396539	0.00211273	0.00385411	1	2
CHAT	10q11.23	0.0141211	0.0102208	0.0167137	1	2
CIB4	2p23.3	0.0959894	2.01004e-05	4.79865e-05	1	2
CLCN5	Xp11.23	0.537861	3.81301e-22	3.6817e-21	1	2
CNTN5	11q22.1	0.081138	0.00110602	0.00210592	1	2
CPEB4	5q35.2	-0.953502	7.06734e-33	1.4977e-31	1	2
CPZ	4p16.1	-0.0939244	0.000667111	0.00130929	1	2
CXorf67	Xp11.22	0.222124	0.00407552	0.0071221	1	2
CYB5A	18q22.3	-1.2559	1.82572e-23	1.9504e-22	1	2
CYP4A22	1p33	-0.0359136	0.00457021	0.0079224	1	2
CYP4F30P	2q21.1	-0.0278134	0.000719345	0.00140545	1	2
DCUN1D1	3q26.33	0.322419	6.1743e-09	2.12294e-08	1	2
DDX10	11q22.3	0.312758	1.46966e-07	4.43014e-07	1	2
DHX40	17q23.1	-0.328833	1.78917e-06	4.81046e-06	1	2
DNAJB6	7q36.3	0.292505	4.7951e-08	1.5209e-07	1	2
ELAVL4	1p33-p32.3	0.10306	0.00546971	0.00936145	1	2
EMB	5q11.1	-0.479454	9.48892e-06	2.35399e-05	1	2
FAM107B	10p13	-0.336539	0.000173257	0.000367335	1	2
FAM178B	2q11.2	0.191208	0.00771422	0.0128877	1	2
FAM3C	7q31.31	0.276258	7.53614e-05	0.000167557	1	2
FETUB	3q27.3	0.0470786	0.00996949	0.0163459	1	2
FICD	12q23.3	-0.266324	9.0374e-08	2.78503e-07	1	2
FPR2	19q13.41	0.16405	3.31486e-07	9.64915e-07	1	2
FRMD5	15q15.3	0.222156	2.07283e-05	4.94079e-05	1	2
GJA1	6q22.31	-1.00723	2.82878e-16	1.77255e-15	1	2
GZMA	5q11.2	0.872531	4.57553e-09	1.59155e-08	1	2
HCRTR2	6p12.1	0.136463	0.0108074	0.0175893	1	2
HLA-DMB	6p21.32	0.364945	0.00242905	0.00439398	1	2
HMCES	3q21.3	0.277197	7.97053e-06	1.99291e-05	1	2
HMGB1P5	3p24.3	0.662701	1.12953e-14	6.28379e-14	1	2
HNRNPD	4q21.22	0.450201	2.72545e-13	1.35289e-12	1	2
HNRNPUL2	11q12.3	0.314978	1.93959e-09	6.97768e-09	1	2
HOXC6	12q13.13	-0.470293	1.85715e-11	7.9452e-11	1	2
HPCAL4	1p34.2	0.0956577	3.34293e-05	7.774e-05	1	2
IFIT5	10q23.31	-0.173225	0.0208833	0.0323239	1	2
IFNE	9p21.3	-0.0781031	0.000227064	0.000474026	1	2
IGF2BP3	7p15.3	0.472144	1.52924e-11	6.59107e-11	1	2
IKZF3	17q12-q21.1	0.736397	8.25225e-12	3.61836e-11	1	2
IL2RB	22q12.3	0.766479	6.79569e-10	2.53898e-09	1	2
IMPA1	8q21.13	0.169425	0.0103837	0.0169587	1	2
IVL	1q21.3	0.539726	7.61367e-08	2.36468e-07	1	2
KATNB1	16q21	0.20383	0.000311136	0.000638637	1	2
KIR2DL3	19q13.42	0.0425697	0.00231953	0.00420672	1	2
KPNA4	3q25.33	0.319119	2.25146e-08	7.36281e-08	1	2
LUC7L3	17q21.33	-0.186356	0.00980535	0.0160964	1	2
LYZL1	10p12.1-p11.23	0.0654849	0.000293784	0.000604995	1	2
MEGF9	9q33.2	-1.20221	3.88722e-31	7.23642e-30	1	2
MPPE1	18p11.21	-0.161159	0.000230943	0.000481572	1	2
MRPL16	11q12.1	0.26873	1.26008e-07	3.82336e-07	1	2
MS4A2	11q12.1	-0.596811	5.24065e-22	5.0045e-21	1	2
MSI1	12q24.31	0.766644	7.59223e-09	2.58971e-08	1	2
NETO2	16q12.1	0.964862	2.05104e-17	1.40158e-16	1	2
NPBWR1	8q11.23	0.122891	0.000100471	0.000219871	1	2
NR2E1	6q21	0.106763	1.08557e-07	3.3176e-07	1	2
NRIP3	11p15.4	-0.412574	0.00024737	0.00051374	1	2
OR2A1	7q35	-0.0434694	5.44393e-10	2.04927e-09	1	2
OR2W3	1q44	-0.117737	0.0146619	0.0233161	1	2
OR3A1	17p13.3	-0.0250659	0.00251214	0.0045335	1	2
PCYT2	17q25.3	0.452973	1.07842e-08	3.63563e-08	1	2
PDCD4	10q25.2	-0.885318	4.19702e-13	2.05262e-12	1	2
PDCL2	4q12	0.103142	7.01167e-05	0.000156478	1	2
PGLYRP4	1q21.3	0.43558	4.97645e-11	2.04824e-10	1	2
PHF11	13q14.2	-0.257563	4.41925e-05	0.000101239	1	2
PLEKHA3	2q31.2	-0.145829	6.33014e-05	0.00014206	1	2
PNPLA3	22q13.31	0.34729	2.57797e-05	6.07925e-05	1	2
PPARD	6p21.31	0.659645	6.71461e-24	7.43236e-23	1	2
PRICKLE1	12q12	0.623675	1.91258e-13	9.61037e-13	1	2
PWP1	12q23.3	0.123962	0.00881082	0.0145847	1	2
RCAN3	1p36.11	0.469132	5.05969e-07	1.44704e-06	1	2
RHOB	2p24.1	-1.84534	5.90311e-40	2.03373e-38	1	2
RNFT1	17q23.1	-0.146922	0.00566891	0.00967422	1	2
RPS27L	15q22.2	-0.509619	1.99794e-19	1.58006e-18	1	2
RSPH3	6q25.3	-0.362575	9.99995e-10	3.68478e-09	1	2
RSPO2	8q23.1	0.0445666	0.00288847	0.00516481	1	2
RTCB	22q12.3	0.12819	0.012318	0.0198432	1	2
SCGB2A1	11q12.3	-1.64847	8.23812e-11	3.33311e-10	1	2
SEMA3B	3p21.31	-1.09683	2.64173e-22	2.58871e-21	1	2
SEPHS1	10p13	0.892268	1.2156e-27	1.75898e-26	1	2
SERHL2	22q13.2	-0.777671	0.000104586	0.000228479	1	2
SERPINE2	2q36.1	1.44224	4.59114e-22	4.40735e-21	1	2
SERPINI1	3q26.1	-1.11704	6.6337e-31	1.21202e-29	1	2
SGK3	8q13.1	-0.332097	0.000688446	0.00134906	1	2
SHC2	19p13.3	-0.903901	5.00274e-18	3.57269e-17	1	2
SLC18A3	10q11.23	0.0758076	0.0312342	0.0468243	1	2
SLC25A47	14q32.2	0.041836	0.000919153	0.00176956	1	2
SLC43A2	17p13.3	0.465345	4.3627e-09	1.51998e-08	1	2
SNPH	20p13	-0.227193	0.0219777	0.0338869	1	2
SPIC	12q23.2	0.119946	0.00133508	0.00251116	1	2
SPOCK2	10q22.1	0.928137	5.62122e-13	2.71634e-12	1	2
SPRYD3	12q13.13	-0.741689	7.12607e-26	9.07566e-25	1	2
SRFBP1	5q23.1	-0.329624	4.30895e-07	1.24169e-06	1	2
SUSD1	9q31.3-q32	-0.128357	0.0294288	0.044355	1	2
SYS1	20q13.12	-0.336691	8.03962e-13	3.83515e-12	1	2
TAF1A	1q41	0.299629	2.28123e-07	6.75912e-07	1	2
TBCCD1	3q27.3	0.296702	2.18067e-07	6.47118e-07	1	2
TEKT2	1p34.3	-0.187062	0.000195174	0.000411054	1	2
TMEM106B	7p21.3	-0.444175	1.30317e-10	5.17886e-10	1	2
TMEM19	12q21.1	-0.123819	0.0277927	0.0420996	1	2
TMEM260	14q22.3	-0.254336	1.17122e-07	3.56651e-07	1	2
TMEM38B	9q31.2	0.380828	1.3729e-06	3.73671e-06	1	2
TNFRSF19	13q12.12	-0.291308	0.0160919	0.0253995	1	2
TPH1	11p15.1	-0.134371	0.000940581	0.00180852	1	2
TRIM47	17q25	1.12378	8.24981e-21	7.23907e-20	1	2
TRIM69	15q15-q21	0.217836	0.00176895	0.00326389	1	2
TXNDC15	5q31.1	-0.474056	4.87554e-23	5.05298e-22	1	2
UBE2J1	6q15	0.328745	1.01336e-07	3.10814e-07	1	2
UPP1	7p12.3	0.749915	8.10859e-16	4.91614e-15	1	2
VPS9D1	16q24.3	0.375714	1.96054e-07	5.83788e-07	1	2
VWA2	10q25.3	-0.698109	1.91654e-07	5.71342e-07	1	2
WDR31	9q32	-0.528757	2.3092e-15	1.35388e-14	1	2
WFDC5	20q13.12	0.121909	0.0282914	0.0427786	1	2
WNT8A	5q31.2	-0.0219598	2.46022e-08	8.01314e-08	1	2
ZIC5	13q32.3	0.244526	4.59284e-06	1.17811e-05	1	2
ZNF484	9q22.31	-0.465257	1.11816e-18	8.33513e-18	1	2
ZNF680	7q11.21	-0.51189	1.45265e-12	6.78662e-12	1	2
ZNF732	4p16.3	0.249657	9.68657e-07	2.68662e-06	1	2
ZNF827	4q31.21-q31.22	-0.317076	2.92109e-05	6.83838e-05	1	2
ZNF844	19p13.2	-0.909547	7.20101e-25	8.53306e-24	1	2
2019-03-06	5p15.2	-0.335434	1.63739e-07	4.91337e-07	3	1
C9orf135	9q21.12	0.0629333	0.0112869	0.0183035	2	1
CAPN12	19q13.2	0.17236	3.88823e-06	1.00579e-05	2	1
CRELD1	3p25.3	-0.321071	2.79189e-06	7.34919e-06	2	1
GDF3	12p13.31	-0.0647476	0.000238818	0.000497083	2	1
GFRAL	6p12.1	-0.0424573	5.88916e-10	2.21071e-09	2	1
HOXB13	17q21.32	0.932037	4.62948e-16	2.86008e-15	2	1
HSD3B1	1p12	-0.0540595	0.00606712	0.0103027	2	1
IFNL1	19q13.2	0.231164	6.94673e-08	2.16621e-07	2	1
NUPL2	7p15.3	0.361402	6.0942e-10	2.28532e-09	2	1
PABPC1	8q22.3	0.953568	2.71205e-23	2.86451e-22	2	1
PAX7	1p36.13	0.185542	0.00265699	0.0047741	2	1
PPP1R13L	19q13.32	0.271482	0.022121	0.0340892	2	1
SERPINB1	6p25.2	-0.579316	3.22326e-13	1.59241e-12	2	1
SNRPN	15q11.2	-0.724289	1.67589e-10	6.60391e-10	2	1
STARD7	2q11.2	0.493018	9.2393e-18	6.47515e-17	2	1
SUPV3L1	10q22.1	0.358387	1.01852e-10	4.08557e-10	2	1
TECPR1	7q21.3	0.176833	0.00148713	0.0027758	2	1
UNC93A	6q27	0.116243	1.48678e-06	4.03342e-06	2	1
ZNF597	16p13.3	-0.426798	9.32287e-15	5.21754e-14	2	1
ADIPOR2	12p13.33	-0.369169	5.98495e-07	1.69477e-06	1	1
AFM	4q13.3	-0.00558071	0.0113114	0.0183417	1	1
AHSG	3q27.3	0.0347087	1.39741e-05	3.40047e-05	1	1
ATP5O	-	0.140961	0.0164748	0.025951	1	1
BTF3	5q13.2	-0.79516	1.2992e-28	2.00151e-27	1	1
C10orf99	10q23.1	0.107544	0.019785	0.0307506	1	1
C11orf86	11q13.2	0.642402	1.53603e-12	7.16606e-12	1	1
C15orf53	15q14	0.0279573	9.4832e-08	2.91354e-07	1	1
C19orf18	19q13.43	-0.373359	2.1755e-09	7.7895e-09	1	1
C1orf50	1p34.2	0.124403	0.00091362	0.00175993	1	1
C1orf54	1q21.2	0.167201	0.0234865	0.0360395	1	1
C7orf49	-	0.165364	7.25533e-05	0.000161589	1	1
CALHM3	10q24.33	0.0667517	1.33471e-06	3.63793e-06	1	1
CASP7	10q25.3	-0.273557	2.67796e-05	6.30037e-05	1	1
CCDC149	4p15.2	-0.259327	2.33399e-06	6.20163e-06	1	1
CCNJ	10q24.1	0.590313	3.48225e-16	2.16711e-15	1	1
CD7	17q25.3	0.908663	2.09241e-15	1.22894e-14	1	1
CEP57L1	6q21	0.287203	1.11924e-08	3.76838e-08	1	1
CEP76	18p11.21	0.289469	1.95591e-09	7.03434e-09	1	1
CNOT8	5q33.2	-0.378418	4.07871e-12	1.83723e-11	1	1
COMT	22q11.21	0.225721	0.00625473	0.0105981	1	1
CSF3	17q21.1	-0.630937	4.10587e-10	1.56171e-09	1	1
CSN1S1	4q13.3	-1.42153	2.66334e-09	9.46093e-09	1	1
CTSS	1q21.3	0.534175	7.0637e-05	0.000157572	1	1
CTSW	11q13.1	0.32076	0.00828008	0.0137624	1	1
CYB5D1	17p13.1	-0.328679	1.89195e-17	1.29603e-16	1	1
DBP	19q13.33	-0.249248	0.000172413	0.000365694	1	1
DDHD1	14q22.1	-0.117957	0.0032025	0.00568393	1	1
DKK1	10q21.1	1.03717	5.04443e-09	1.74831e-08	1	1
DKKL1	19q13.33	0.297349	2.39891e-10	9.31406e-10	1	1
DNAJB14	4q23	-0.55116	1.22135e-19	9.81008e-19	1	1
DNM1L	12p11.21	0.33443	5.30563e-08	1.67394e-07	1	1
DNMT3L	21q22.3	0.0189468	5.21649e-05	0.000118387	1	1
EMC3	3p25.3	-0.432367	1.55725e-11	6.70467e-11	1	1
EPN2	17p11.2	-0.302491	4.425e-07	1.27322e-06	1	1
ERLIN2	8p11.23	-0.531542	2.64621e-11	1.11637e-10	1	1
FAM19A4	3p14.1	0.222054	1.70477e-09	6.15907e-09	1	1
FAM90A1	12p13.31	0.526687	9.02827e-14	4.65988e-13	1	1
FEM1C	5q22.3	-0.656116	5.80018e-24	6.44562e-23	1	1
GATA2	3q21.3	-0.730416	7.62728e-13	3.64513e-12	1	1
GMPR	6p22.3	0.295649	0.0163887	0.0258273	1	1
GPR26	10q26.13	0.12908	0.00118712	0.00224945	1	1
HAUS3	4p16.3	-0.218545	6.67755e-06	1.68371e-05	1	1
HIST1H1T	6p22.2	0.121816	3.60177e-06	9.35207e-06	1	1
HNRNPA1	12q13.13	0.192317	0.00622968	0.0105585	1	1
HPDL	1p34.1	1.66346	1.56112e-35	3.94063e-34	1	1
HRH3	20q13.33	0.109677	0.00122571	0.00231741	1	1
IFITM10	11p15.5	0.679452	4.79769e-09	1.66564e-08	1	1
IFNL3	19q13.2	0.119833	5.65353e-08	1.77862e-07	1	1
IL2RA	10p15.1	0.905658	8.95308e-17	5.82438e-16	1	1
IL2RG	Xq13.1	1.0952	7.5066e-13	3.58934e-12	1	1
INCA1	17p13.2	-0.420323	1.10523e-07	3.37344e-07	1	1
JMJD6	17q25.1	0.398235	1.40275e-12	6.56022e-12	1	1
JMJD7	15q15.1	-0.0423754	0.00382812	0.0067207	1	1
KLHDC7A	1p36.13	-1.2287	1.54048e-21	1.42225e-20	1	1
KRT38	17q21.2	0.0728132	0.00251516	0.00453827	1	1
KRTAP13-4	21q22.11	-0.128877	1.09105e-15	6.542e-15	1	1
LPCAT3	12p13.31	-0.226731	0.00374586	0.00658484	1	1
LRRC17	7q22.1	-1.47278	1.43694e-26	1.91715e-25	1	1
LYPD5	19q13.31	0.914599	2.53437e-15	1.4811e-14	1	1
LZTFL1	3p21.31	-0.652685	2.39604e-20	2.03106e-19	1	1
MAT1A	10q22.3	0.40054	4.22502e-07	1.21876e-06	1	1
MATK	19p13.3	0.400813	8.96514e-05	0.000197247	1	1
MFHAS1	8p23.1	0.724098	3.42099e-19	2.65817e-18	1	1
MIR222	Xp11.3	-0.216129	9.71391e-10	3.58083e-09	1	1
MLLT3	9p21.3	-0.493303	1.74678e-09	6.30586e-09	1	1
MSGN1	2p24.2	0.0642874	0.00939732	0.0154726	1	1
MTCH1	6p21.2	0.407267	5.21608e-10	1.96675e-09	1	1
NAF1	4q32.2	-0.220155	2.47354e-05	5.84281e-05	1	1
NHP2L1	-	0.429605	2.19633e-13	1.09741e-12	1	1
NKX2-3	10q24.2	0.187535	4.99665e-06	1.27585e-05	1	1
NR1I3	1q23.3	0.178622	4.91128e-13	2.38752e-12	1	1
NRAS	1p13.2	0.560957	5.54697e-07	1.57712e-06	1	1
NUP35	2q32.1	0.185533	0.00170722	0.00315687	1	1
OLFM3	1p21.1	0.111949	0.00332373	0.0058842	1	1
OPN3	1q43	0.825095	1.49923e-19	1.19709e-18	1	1
OR4C6	11q11	0.0290722	0.000756593	0.00147349	1	1
PAGE2	Xp11.21	0.333142	0.00920122	0.0151751	1	1
PDZK1IP1	1p33	0.799573	0.000342284	0.000698167	1	1
PFKFB2	1q32.1	0.415618	5.49152e-08	1.72967e-07	1	1
PHOSPHO2	2q31.1	-0.70154	3.3035e-22	3.21179e-21	1	1
PLA2G12A	4q25	-0.599626	1.40291e-19	1.12289e-18	1	1
PPIAL4G	1q21.2	0.0192988	0.00157969	0.00293624	1	1
PRKRA	2q31.2	0.186048	3.59001e-05	8.31147e-05	1	1
PRRT1	6p21.32	-0.306613	1.28342e-10	5.10484e-10	1	1
PSAPL1	4p16.1	0.189816	1.84517e-06	4.95406e-06	1	1
PSMG2	18p11.21	0.264929	4.82338e-06	1.23394e-05	1	1
RAB23	6p12.1-p11.2	0.344521	5.67817e-05	0.00012821	1	1
REPS1	6q24.1	0.404132	4.11255e-09	1.43612e-08	1	1
RIOK1	6p24.3	0.760255	9.21587e-19	6.91902e-18	1	1
RNF186	1p36.13	-0.850211	1.1331e-19	9.12739e-19	1	1
RXFP4	1q22	0.0449468	0.00270434	0.00485367	1	1
SENP3	17p13	0.324234	2.44795e-09	8.72643e-09	1	1
SERTAD4	1q32.2	0.710344	7.12025e-07	2.00133e-06	1	1
SESN2	1p35.3	-0.30562	3.865e-06	9.99995e-06	1	1
SGPP2	2q36.1	0.42899	0.000839241	0.00162421	1	1
SHPK	17p13.2	-0.184097	1.28399e-05	3.13746e-05	1	1
SIGLEC15	18q21.1	-0.505667	5.61683e-07	1.59574e-06	1	1
SIRPD	20p13	0.0133835	0.0335203	0.0499778	1	1
SKP2	5p13.2	1.17738	9.40145e-31	1.69813e-29	1	1
SLAMF6	1q23.2-q23.3	0.619835	1.22775e-07	3.7299e-07	1	1
SLC46A2	9q32	-0.0691353	0.000231494	0.000482664	1	1
SMCO3	12p12.3	-0.195085	0.00110494	0.00210423	1	1
SNAP23	15q15.1-q15.2	-0.455078	2.30425e-16	1.45512e-15	1	1
SPAST	2p22.3	0.372203	1.46887e-09	5.33802e-09	1	1
ST8SIA6	10p12.33	-1.1682	1.33096e-17	9.20907e-17	1	1
STC2	5q35.2	-2.27105	7.41433e-23	7.57858e-22	1	1
SULT1C3	2q12.3	-0.915755	3.46693e-05	8.04339e-05	1	1
TADA2B	4p16.1	-0.593734	6.55444e-23	6.73173e-22	1	1
TATDN3	1q32.3	-0.153031	0.00113384	0.00215521	1	1
TEN1	17q25.1	0.0399991	0.000225689	0.000471371	1	1
TMEM59	1p32.3	-0.437274	6.85866e-14	3.57549e-13	1	1
TNFRSF13B	17p11.2	0.134322	0.0044707	0.0077617	1	1
TOE1	1p34.1	0.19752	0.000647	0.00127263	1	1
TRBC2	7q34	0.881693	4.87271e-08	1.54457e-07	1	1
TRIM16	17p12	0.368134	2.31269e-09	8.258e-09	1	1
TWSG1	18p11.22	-0.206895	0.00926336	0.0152693	1	1
UBA52	19p13.1-p12	0.355449	3.90862e-07	1.13134e-06	1	1
UCK1	9q34.13	-0.168338	0.00154664	0.00287936	1	1
UGT1A7	2q37.1	-0.0384825	0.0128892	0.0206965	1	1
USP10	16q24.1	0.347301	1.23338e-08	4.13055e-08	1	1
VAMP1	12p13.31	-0.171974	0.0289297	0.0436658	1	1
VAX1	10q25.3	0.204295	7.87694e-07	2.20247e-06	1	1
WAPAL	-	-0.229715	0.00041141	0.000830153	1	1
WDR92	2p14	0.0923294	0.000169898	0.000360716	1	1
ZAR1L	13q13.1	0.0731514	0.00129007	0.00243165	1	1
ZFAND2B	2q35	0.248414	0.000106841	0.000233124	1	1
ZNF117	7q11.21	-0.401936	2.37061e-05	5.61023e-05	1	1
ZNF311	6p22.1	-0.332246	4.53193e-07	1.30224e-06	1	1
ZNF487	10q11.21	-0.260702	3.63461e-13	1.78691e-12	1	1
