# Supplementary material for: Delineation of the Germline and Somatic Mutation Interaction Landscape in Triple-Negative and Non-Triple-Negative Breast Cancer
Source: Int J Genomics. 2020 Jul 6;2020:2641370. doi: 10.1155/2020/2641370 (PMC7364202; doi:10.1155/2020/2641370)
Supplement: Supplementary Materials — All additional results from the analysis are shown in the supplementary tables described. Supplementary Table SG: GWAS information-genetic variants and genes associated with an increased risk of developing breast cancer. Supplementary Table SM: somatic mutated genes significantly associated with TNBC vs. control and non-TNBC vs. control. Supplementary Table SN: nonsomatic mutated genes significantly associated with TNBC vs. control and non-TNBC vs. control. Supplementary Table S2A1: list of all somatic mutated genes significantly associated with TNBC. Supplementary Table S2A2: list of all somatic mutated genes significantly associated with non-TNBC. Supplementary Table S1: differentially expressed and uniquely somatic mutated genes between TNBC and non-TNBC. Supplementary Table SA3: significantly differentially expressed germline mutated genes with and without somatic mutations in TNBC. Supplementary Table SB3: significantly differentially expressed germline mutated genes with and without somatic mutations in non-TNBC. Supplementary Table S3A: genes containing both germline and somatic mutations significantly associated with TNBC. Supplementary Table S3B: genes containing both germline and somatic mutations significantly associated with non-TNBC. Supplementary Table S3C: a complete list of 251 genes containing both germline and somatic mutations distinguishing TNBC from non-TNBC. [file 2641370.f1.zip › mat.2641370.v2/Table S2A2.xlsx]

## Sheet: 08.TNBC.ERPBC.7386ERPBC.TNBC.So
Table S2A2. List of all somatic mutated genes significantly associated with non-TNBC.
Genes	Chromosome position	logFC	P.value	adj.P.Val	Somatic Mutation Event in non-TNBC	Somatic Mutation Event in TNBC
GATA3	10p14	2.24735	1.68585e-44	3.45149e-43	99
FOXA1	14q21.1	2.8479	2.76567e-42	5.06482e-41	23
FRMPD4	Xp22.2	-2.51839	1.67951e-57	6.82639e-56	21
MGA	15q15	-0.389722	1.16989e-06	2.61918e-06	21
WNK3	Xp11.22	-1.11478	9.42876e-11	2.93464e-10	18
PHKA2	Xp22.13	-0.4875	9.32953e-20	5.25248e-19	17
SF3B1	2q33.1	-0.109971	0.0153344	0.0217908	17
ACACB	12q24.11	-2.98253	3.73332e-74	4.20539e-72	16
LRP4	11p11.2	-1.79598	1.37715e-33	1.62769e-32	16
NCOA6	20q11.22	0.255828	2.43706e-05	4.81929e-05	16
NRCAM	7q31.1	0.453347	0.0330653	0.0447673	16
RAB3GAP2	1q41	0.171735	0.0111165	0.0161097	16
SETX	9q34.13	-0.431705	3.47413e-11	1.115e-10	16
CBLB	3q13.11	-0.296272	2.18146e-07	5.2012e-07	15
COL4A6	Xq22.3	-2.43584	1.66039e-22	1.09704e-21	15
DOCK3	3p21.2	-0.442385	0.0180024	0.0253699	15
SIPA1L1	14q24.1	-0.199385	0.00133281	0.00217817	15
ABCB11	2q31.1	-1.65633	2.17428e-16	9.84348e-16	14
CDH8	16q21	-1.42967	2.51447e-17	1.20749e-16	14
CNTNAP3B	9p11.2	-3.80785	4.03248e-64	2.4459e-62	14
DSE	6q22.1	-0.843853	1.83299e-16	8.35319e-16	14
FRMD4A	10p13	-1.03695	5.15524e-37	7.12797e-36	14
GNAS	20q13.32	0.272007	0.000773347	0.00129917	14
HIVEP1	6p24.1	-0.22715	0.00831561	0.012275	14
KCNH7	2q24.2	-0.368728	0.00903669	0.013265	14
KIF13A	6p22.3	-0.720172	4.55014e-20	2.60962e-19	14
NPR2	9p13.3	-1.66232	3.96181e-55	1.42367e-53	14
TLR4	9q33.1	-1.50738	6.449e-36	8.46715e-35	14
TNC	9q33.1	-0.533968	0.0039935	0.0061554	14
ZNF592	15q25.2	-0.306065	4.43334e-09	1.2167e-08	14
ZNF831	20q13.32	-0.771506	0.000430436	0.000744877	14
ABCC4	13q32.1	-0.309005	0.0320073	0.0434243	13
ADAMTS7	15q25.1	0.867132	1.1237e-13	4.30542e-13	13
ANKRD17	4q13.3	-0.201495	0.00541102	0.00819522	13
CCDC88C	14q32.11-q32.12	0.839261	1.54321e-18	8.06316e-18	13
CDH26	20q13.33	-0.851436	2.75123e-10	8.2837e-10	13
IGF2R	6q25.3	-0.381322	4.76341e-07	1.10249e-06	13
IKBKAP	-	0.141498	0.00719867	0.0107128	13
MASP1	3q27.3	-4.24814	9.32799e-72	9.00118e-70	13
MTUS2	13q12.3	-0.680139	0.000599446	0.00102001	13
PTPN13	4q21.3	-0.517123	0.00046365	0.000799288	13
TCF4	18q21.2	-0.863422	1.27439e-15	5.50744e-15	13
TIAM2	6q25.2-q25.3	-0.455321	1.43606e-09	4.08875e-09	13
ADGB	6q24.3	0.685977	0.000588514	0.00100289	12
CDH12	5p14.3	-4.4219	9.99461e-79	1.56722e-76	12
CDH24	14q11.2	0.584212	1.5592e-11	5.12638e-11	12
CHI3L1	1q32.1	-1.5937	9.44601e-11	2.93968e-10	12
DOPEY1	6q14.1	-0.871345	8.00447e-25	6.00618e-24	12
IREB2	15q25.1	-0.346924	2.45309e-07	5.8232e-07	12
KIF1A	2q37.3	0.954438	0.0071711	0.010677	12
LARP1	5q33.2	0.242882	5.61927e-06	1.18292e-05	12
MAGI3	1p13.2	0.398123	0.000339426	0.000594383	12
MAP3K4	6q26	-0.418384	3.90769e-13	1.44254e-12	12
MYB	6q23.3	1.75092	2.05381e-30	2.06223e-29	12
MYO5A	15q21.2	-0.277392	0.00102384	0.00169563	12
PCDHGB6	5q31	-1.60363	3.69722e-33	4.2675e-32	12
PHF8	Xp11.22	0.285832	8.08285e-06	1.67332e-05	12
RGS7	1q43	1.11804	3.00586e-06	6.48395e-06	12
SEMA5A	5p15.31	-1.63282	2.68269e-31	2.83449e-30	12
THEM5	1q21.3	-0.725029	8.04431e-10	2.3321e-09	12
ADAMTS12	5p13.3-p13.2	0.749265	3.31919e-07	7.79867e-07	11
ADAMTS9	3p14.1	-1.68193	2.96709e-41	5.11147e-40	11
ALDH1L1	3q21.3	-4.80401	3.3833e-74	3.84248e-72	11
ATP11C	Xq27.1	-0.727212	3.0038e-17	1.43449e-16	11
CABIN1	22q11.23	0.288318	2.69453e-07	6.37603e-07	11
CALD1	7q33	-1.07617	1.37726e-22	9.13914e-22	11
EFCAB6	22q13.2-q13.31	-0.417697	0.000331843	0.000581769	11
GPRASP2	Xq22.1	-1.43253	4.0457e-56	1.53159e-54	11
IFT122	3q21.3-q22.1	0.491457	1.60073e-11	5.25602e-11	11
JAK1	1p31.3	-0.648129	1.04067e-20	6.20308e-20	11
KCNJ12	17p11.2	-1.47359	1.63337e-17	7.94322e-17	11
MAGI2	7q21.11	-0.718807	1.39084e-07	3.37177e-07	11
MAP1B	5q13.2	-1.56314	1.10884e-29	1.07715e-28	11
NFE2L3	7p15.2	0.540696	9.00683e-07	2.03513e-06	11
OCRL	Xq26.1	0.165916	0.0134043	0.0192002	11
PHF12	17q11.2	0.262118	2.18583e-05	4.34364e-05	11
PLCG1	20q12	-0.187329	0.00182736	0.0029365	11
PTPRM	18p11.23	-1.41107	2.31005e-44	4.705e-43	11
RAD54B	8q22.1	1.16562	1.38219e-26	1.14552e-25	11
SBF2	11p15.4	-0.975023	1.69416e-19	9.40942e-19	11
SEC24B	4q25	-0.353586	1.10797e-09	3.17855e-09	11
SIPA1L3	19q13.13-q13.2	1.06746	2.1514e-42	3.97419e-41	11
SLITRK2	Xq27.3	-1.97222	3.76767e-27	3.20926e-26	11
SORBS2	4q35.1	-1.76608	9.83816e-24	6.98876e-23	11
TNS1	2q35	-2.64412	1.49656e-107	3.75472e-104	11
TRAPPC8	18q12.1	-0.2062	0.00284138	0.00446868	11
TTLL5	14q24.3	0.155954	0.00270345	0.00426317	11
USP15	12q14.1	-0.20859	3.30324e-05	6.4317e-05	11
YEATS2	3q27.1	-0.154833	0.0105514	0.0153439	11
ACAN	15q26.1	2.31741	2.11715e-39	3.31607e-38	10
ACVR2A	2q22.3-q23.1	-1.06029	3.07127e-37	4.30258e-36	10
ADAMTS3	4q13.3	-1.93666	1.54668e-43	3.02948e-42	10
AR	Xq12	0.390514	0.0170635	0.02412	10
ATG2B	14q32.2	-0.481144	1.27672e-12	4.53065e-12	10
ATG9B	7q36.1	0.982182	9.23553e-12	3.08761e-11	10
ATP7B	13q14.3	0.845749	2.63081e-09	7.34497e-09	10
BAI1	-	-0.735452	4.02513e-05	7.76511e-05	10
BLM	15q26.1	1.45635	1.38018e-35	1.78828e-34	10
C3orf20	3p25.1	-0.872031	9.30688e-09	2.48718e-08	10
CCDC136	7q32.1	-1.60738	2.33495e-36	3.13424e-35	10
COL17A1	10q25.1	-3.76494	1.41665e-28	1.30934e-27	10
CRAMP1L	-	0.151638	0.0280187	0.0383504	10
DCLK1	13q13.3	-1.05798	1.03334e-07	2.53046e-07	10
DENND2C	1p13.2	-1.71593	8.40651e-53	2.68211e-51	10
DNM3	1q24.3	-0.746164	5.94213e-12	2.0092e-11	10
EPHA5	4q13.1-q13.2	-0.982885	6.49076e-09	1.75861e-08	10
EPRS	1q41	0.586402	6.47782e-17	3.03317e-16	10
ERBB2IP	-	0.224758	0.00089034	0.00148577	10
FLII	17p11.2	-0.195109	0.00521462	0.00791383	10
GPR64	-	-2.08428	6.95609e-43	1.31309e-41	10
GRIA4	11q22.3	-4.70302	3.82889e-50	1.06845e-48	10
HSPD1	2q33.1	0.355478	1.41592e-05	2.86527e-05	10
KCNH1	1q32.2	2.21301	1.65505e-19	9.19963e-19	10
L3MBTL3	6q23.1	-0.49618	6.2457e-10	1.82556e-09	10
MED14	Xp11.4	0.315605	7.84303e-07	1.78076e-06	10
MID1	Xp22	-2.60771	3.28199e-57	1.30891e-55	10
MTHFD1	14q23.3	-0.334344	9.70523e-08	2.38318e-07	10
MYO6	6q14.1	0.81649	1.76431e-19	9.79313e-19	10
NLRP9	19q13.43	-0.314992	0.0239251	0.0330937	10
NOS2	17q11.2	-0.361704	0.00303624	0.00475887	10
OTUD4	4q31.21	-0.433174	2.75697e-10	8.3001e-10	10
PCDH18	4q28.3	-1.9488	1.17646e-44	2.41938e-43	10
PCDH9	13q21.32	-3.48965	5.11752e-56	1.92679e-54	10
PITPNM1	11q13.2	0.390238	0.000219142	0.000391475	10
RARB	3p24.2	-1.51755	2.86434e-33	3.32422e-32	10
ROR1	1p31.3	-1.68179	1.51802e-28	1.40115e-27	10
ROR2	9q22.31	0.72476	2.5035e-07	5.93979e-07	10
RUNX1T1	8q21.3	-1.96218	2.94082e-46	6.65719e-45	10
SELP	1q24.2	-2.42302	1.36687e-23	9.64039e-23	10
TBC1D25	Xp11.23	-0.309441	1.48049e-12	5.23023e-12	10
TBL1XR1	3q26.32	0.404295	9.38557e-09	2.50724e-08	10
UBAP2L	1q21.3	0.678622	8.75997e-36	1.1436e-34	10
ULK4	3p22.1	0.308518	0.00109124	0.00180131	10
VWDE	7p21.3	-2.02777	3.66306e-12	1.25941e-11	10
WASH6P	Xq28 and Yq12	0.253192	0.00777872	0.0115226	10
AKAP11	13q14.11	-0.625468	5.29828e-13	1.93569e-12	9
ALPK2	18q21.31-q21.32	0.553067	0.00324742	0.00506627	9
AMY2B	1p21.1	-1.53105	2.2753e-26	1.86332e-25	9
ARHGEF40	14q11.2	-1.22902	1.29343e-47	3.15049e-46	9
ARHGEF4	2q21.1	-2.24999	5.50512e-39	8.45937e-38	9
ATP8B3	19p13.3	0.825644	7.93962e-10	2.30311e-09	9
AVL9	7p14.3	0.488395	4.82406e-12	1.6412e-11	9
BAI2	-	1.75767	4.76655e-25	3.63089e-24	9
BRIP1	17q23.2	1.71401	1.51323e-31	1.62435e-30	9
BTK	Xq22.1	0.305441	0.00436035	0.00668724	9
C17orf97	17p13.3	0.560465	9.57621e-08	2.35296e-07	9
C5	9q33.2	-0.512368	2.38451e-07	5.66966e-07	9
CCDC80	3q13.2	-1.56083	9.18278e-20	5.17302e-19	9
CEP120	5q23.2	-0.44112	2.33125e-12	8.12449e-12	9
CLEC16A	16p13.13	0.2257	6.79319e-06	1.41643e-05	9
CYP24A1	20q13.2	-1.67578	2.73394e-08	7.02789e-08	9
DGKG	3q27.2-q27.3	-1.08144	5.4841e-19	2.94742e-18	9
DNM2	19p13.2	0.301588	3.63531e-10	1.08427e-09	9
DYRK1A	21q22.13	-0.127547	0.00685221	0.0102314	9
EIF4ENIF1	22q12.2	-0.17652	0.000114454	0.000210847	9
EIF4G1	3q27.1	0.353038	1.67284e-10	5.10526e-10	9
ESYT1	12q13.2	-0.862085	2.31952e-40	3.79906e-39	9
EXOC4	7q33	-0.10592	0.0309673	0.0420982	9
FBLN2	3p25.1	-1.15923	2.05201e-12	7.18124e-12	9
FDPS	1q22	0.496888	3.86929e-13	1.42894e-12	9
FHDC1	4q31.3	0.962664	2.0966e-21	1.29823e-20	9
FOXP1	3p13	-0.160552	0.0328449	0.0444973	9
GTSE1	22q13.31	2.56258	7.47486e-70	6.49369e-68	9
HDAC1	1p35.2-p35.1	0.44699	1.86674e-13	7.03804e-13	9
ITIH2	10p14	-2.45763	4.94609e-27	4.18975e-26	9
JPH4	14q11.2	-1.42735	1.86709e-28	1.71588e-27	9
KAT2B	3p24.3	-1.38818	2.20711e-44	4.49866e-43	9
KCNB1	20q13.13	-4.13117	2.25038e-74	2.60949e-72	9
KDR	4q12	-1.15324	7.9922e-30	7.81327e-29	9
LILRB1	19q13.42	0.583423	3.75627e-07	8.78597e-07	9
LTK	15q15.1	-0.869059	4.63428e-07	1.0735e-06	9
MAP3K15	Xp22.12	-1.50386	1.68946e-29	1.62799e-28	9
MBD1	18q21.1	-0.188647	1.05328e-05	2.15658e-05	9
MCM10	10p13	2.32373	4.12759e-45	8.76255e-44	9
MCM7	7q22.1	0.34674	1.57232e-05	3.16922e-05	9
MKL2	16p13.12	-0.20642	0.019718	0.0276064	9
MRE11A	-	-0.432772	8.48542e-14	3.27846e-13	9
NEK5	13q14.3	1.13888	1.24656e-15	5.38887e-15	9
NLRC3	16p13.3	0.218247	0.0285098	0.0389878	9
NXF5	Xq22.1	0.559801	0.000549535	0.0009396	9
OGDH	7p13	-0.205563	0.000286581	0.000505791	9
OSBPL1A	18q11.2	-1.06029	3.38168e-34	4.11497e-33	9
PARD3	10p11.22-p11.21	-0.826998	1.1216e-21	7.06067e-21	9
PARP14	3q21.1	0.585211	8.88452e-09	2.37984e-08	9
PDE4D	5q11.2-q12.1	-0.453237	0.000891086	0.00148692	9
PGAP1	2q33.1	-1.23187	4.04413e-22	2.61627e-21	9
POU6F2	7p14.1	-1.97797	1.07104e-18	5.64959e-18	9
PRKCE	2p21	-0.538836	1.78557e-07	4.28804e-07	9
PRKD3	2p22.2	-1.1317	7.43797e-27	6.22605e-26	9
PTCH2	1p34.1	-1.70902	1.0462e-38	1.57863e-37	9
RAB11FIP1	8p11.23	0.640403	0.000180343	0.000325386	9
RAG1	11p12	-1.2795	1.38049e-25	1.08266e-24	9
RHBDF2	17q25.3	0.597482	2.18211e-13	8.19234e-13	9
ROBO4	11q24.2	-1.76561	1.00786e-59	4.67476e-58	9
SH3BP4	2q37.2	0.283197	0.00271635	0.0042823	9
SLC30A5	5q13.1-q13.2	0.180233	0.00102082	0.00169103	9
SLC35B2	6p21.1	0.401521	3.55985e-10	1.06314e-09	9
SLC35F3	1q42.2	-2.59083	1.47164e-21	9.20492e-21	9
SLC8A3	14q24.2	-1.20134	1.3844e-11	4.56855e-11	9
SSFA2	2q31.3	-0.415074	0.0035971	0.00557994	9
STARD8	Xq13.1	-1.10671	3.87095e-33	4.46243e-32	9
TIAM1	21q22.11	0.368264	0.00238615	0.00378617	9
TMC5	16p12.3	0.758043	0.00271603	0.00428204	9
TNS4	17q21.2	-1.75418	3.30307e-11	1.06183e-10	9
TSHR	14q24-q31	-1.50798	1.66708e-20	9.80561e-20	9
UGGT1	2q14.3	0.238587	6.79452e-05	0.000128058	9
WAS	Xp11.23	0.373276	0.000930018	0.00154889	9
ZFP36L1	14q24.1	-0.85174	1.94688e-18	1.01091e-17	9
ZNF527	19q13.12	-0.320578	8.23324e-10	2.38502e-09	9
ABCF1	6p21.33	0.265995	6.22532e-07	1.42673e-06	8
ACOXL	2q13	0.540111	0.00113905	0.00187586	8
ACSS3	12q21.31	-1.19745	1.65887e-13	6.27488e-13	8
ACTN3	11q13.2	-0.490828	0.0014868	0.00241553	8
ADAM19	5q33.3	1.44371	1.70161e-30	1.71892e-29	8
ADCY3	2p23.3	-0.803317	4.8092e-23	3.27714e-22	8
AKNA	9q32	-0.345421	0.000278706	0.000492649	8
ALOXE3	17p13.1	0.619311	0.00218434	0.00347935	8
APP	21q21.3	-0.637042	6.74273e-14	2.62019e-13	8
ARHGAP12	10p11.22	-0.390597	8.82529e-08	2.17562e-07	8
BEST1	11q12.3	-0.673307	6.4858e-13	2.35179e-12	8
BMX	Xp22.2	-2.96895	7.14197e-58	2.95508e-56	8
CAMSAP3	19p13.2	1.77062	1.2985e-38	1.95291e-37	8
CD22	19q13.12	1.1611	1.17009e-13	4.47383e-13	8
CDH19	18q22.1	-3.94788	1.42921e-42	2.65432e-41	8
CDK14	7q21.13	-0.34273	0.00109608	0.00180876	8
CHTF18	16p13.3	1.60105	3.77721e-36	5.01653e-35	8
CLCN4	Xp22.2	-1.90966	7.92269e-38	1.14717e-36	8
COASY	17q21.2	0.467159	3.64348e-10	1.08647e-09	8
COL1A1	17q21.33	2.55109	3.04955e-44	6.17021e-43	8
CORO7	16p13.3	0.848395	2.08203e-22	1.36874e-21	8
CRB1	1q31.3	-1.22521	1.2552e-10	3.8636e-10	8
CRISPLD1	8q21.13	-2.21995	7.23807e-21	4.35199e-20	8
CTAGE5	14q21.1	0.421894	2.21507e-11	7.20212e-11	8
CUL4B	Xq24	-0.1064	0.0281467	0.0385179	8
CUX1	7q22.1	0.227288	0.000998891	0.00165689	8
DCST1	1q21.3	0.437021	0.000763279	0.00128359	8
DENND2D	1p13.3-p13.2	0.768052	6.05676e-24	4.35184e-23	8
DSC2	18q12.1	-1.14707	3.98453e-12	1.36518e-11	8
EFTUD2	17q21.31	0.32615	1.96005e-09	5.52709e-09	8
EHBP1	2p15	-1.23859	8.6284e-73	8.85229e-71	8
ELP2	18q12.2	0.526907	3.47955e-05	6.7602e-05	8
EML2	19q13.32	0.744528	5.06931e-16	2.24527e-15	8
EMR3	-	-0.867505	3.65759e-07	8.56167e-07	8
ENPP4	6p21.1	-0.336124	0.00892446	0.0131128	8
EPAS1	2p21	-1.82803	1.35671e-65	8.87264e-64	8
EPHA1	7q34-q35	0.740023	9.00001e-15	3.69837e-14	8
EWSR1	22q12.2	0.216904	3.8839e-07	9.06834e-07	8
EXOC2	6p25.3	0.527531	3.74296e-07	8.75556e-07	8
EXOC3	5p15.33	-0.115767	0.014272	0.0203652	8
EXOSC9	4q27	0.147119	0.00290066	0.00455723	8
FASTKD2	2q33.3	-0.198174	4.70256e-05	9.02136e-05	8
FEZ1	11q24.2	-1.48001	1.17592e-37	1.68412e-36	8
FRMD3	9q21.32	-2.07752	2.10723e-54	7.31512e-53	8
GAS6	13q34	-0.878767	1.51444e-13	5.74272e-13	8
GLB1L3	11q25	-2.72924	7.89212e-37	1.08039e-35	8
GNL3L	Xp11.22	0.315068	0.000630629	0.00107076	8
GORAB	1q24.2	0.452674	1.44162e-11	4.75112e-11	8
HPS4	22q12.1	-0.228425	3.18112e-05	6.20838e-05	8
IGF1R	15q26.3	0.495329	0.000813946	0.00136397	8
KCNK9	8q24.3	1.08481	4.62157e-10	1.36837e-09	8
KIAA1107	1p22.1	-0.784169	2.4852e-14	9.9171e-14	8
KIAA1549	7q34	0.344196	0.000429105	0.000742659	8
KRIT1	7q21.2	-0.187181	0.00114999	0.00189262	8
LAMB3	1q32.2	-2.57705	9.19374e-38	1.32634e-36	8
LEPRE1	-	0.593616	9.39282e-14	3.61993e-13	8
LIG3	17q12	0.796933	3.28378e-26	2.66233e-25	8
LRCH2	Xq23	-1.52038	2.42259e-31	2.56754e-30	8
MAGED2	Xp11.21	1.3147	1.45011e-30	1.46917e-29	8
MAGEE2	Xq13.3	-1.50983	1.0299e-22	6.88548e-22	8
MARK1	1q41	-1.7467	6.64853e-25	5.01191e-24	8
MATN2	8q22.1-q22.2	-3.31802	3.07124e-66	2.11371e-64	8
MBD6	12q13.3	0.331489	3.0024e-07	7.07844e-07	8
MBTD1	17q21.33	-0.248046	0.00229692	0.00365177	8
MCTP2	15q26.2	-1.92908	4.73608e-27	4.01679e-26	8
MTTP	4q23	-0.983866	1.24935e-08	3.30232e-08	8
NCOA5	20q13.12	0.32651	1.78255e-15	7.64133e-15	8
NDST1	5q33.1	-0.625188	1.98877e-16	9.03623e-16	8
NFATC3	16q22.1	-0.726065	3.28517e-21	2.0152e-20	8
NRP1	10p11.22	-1.079	3.37319e-28	3.04924e-27	8
NUPL1	-	0.240244	0.000537189	0.000919572	8
PCDHA3	5q31.3	-0.78541	0.000410593	0.000712227	8
PCID2	13q34	-0.181556	0.000391593	0.000680682	8
PDE6A	5q32	-0.433328	0.00135986	0.00221923	8
PDGFRB	5q32	-0.252364	0.0177531	0.025037	8
PGK1	Xq21.1	0.574799	1.07164e-13	4.10996e-13	8
PKP4	2q24.1	-0.192595	0.00112995	0.00186164	8
PLA2G4A	1q31.1	-2.6602	2.42759e-75	3.00434e-73	8
PLA2G4D	15q14	1.22995	2.48779e-09	6.95765e-09	8
PMS1	2q32.2	-0.189275	5.18918e-05	9.90532e-05	8
POP1	8q22.2	0.589967	1.35961e-13	5.1748e-13	8
PRDM16	1p36.32	-2.00238	6.02861e-41	1.01698e-39	8
PREPL	2p21	-0.174989	0.00668573	0.00999906	8
PRKCQ	10p15.1	-1.05558	4.14747e-09	1.14083e-08	8
PRKD2	19q13.2	0.286083	7.15426e-07	1.63095e-06	8
PRKRIR	-	-0.345402	3.03581e-05	5.93949e-05	8
QARS	3p21.31	-0.184822	0.000644654	0.00109329	8
RBM33	7q36.3	-0.369905	6.30768e-14	2.4539e-13	8
RECQL5	17q25	0.420089	1.46744e-09	4.1751e-09	8
RFX3	9p24.2	-0.256969	0.0198943	0.0278221	8
RPRD1B	20q11.23	0.205356	0.000643165	0.00109097	8
RPS6KA1	1p36.11	0.707025	1.10254e-17	5.42192e-17	8
SEMA5B	3q21.1	0.509315	5.73979e-06	1.20682e-05	8
SHISA9	16p13.12	1.25979	9.82251e-05	0.000182264	8
SLC16A1	1p13.2	-0.557066	3.09224e-05	6.04473e-05	8
SMG7	1q25.3	0.630033	1.70377e-30	1.71985e-29	8
SNX25	4q35.1	0.244124	0.00171777	0.00276862	8
SPARCL1	4q22.1	-1.85136	2.78245e-47	6.66003e-46	8
SUPT16H	14q11.2	0.186671	0.000204819	0.000367266	8
SUZ12	17q11.2	0.249656	0.00026613	0.000471113	8
TBC1D1	4p14	-0.338908	4.69058e-06	9.94703e-06	8
TCEB3	-	-0.168353	0.000237769	0.000423323	8
TFAP2A	6p24.3	1.44378	2.61094e-25	2.02179e-24	8
TPM2	9p13.3	-1.35231	4.24617e-21	2.59089e-20	8
TPTE2	13q12.11	-0.630758	8.49825e-05	0.000158695	8
TRAFD1	12q24.13	0.512889	2.32055e-18	1.19891e-17	8
TRPC4	13q13.3	0.407513	8.75644e-05	0.000163328	8
TRPS1	8q23.3	1.22401	2.56993e-20	1.49316e-19	8
TTYH2	17q25.1	-0.831578	5.17129e-15	2.15944e-14	8
USP48	1p36.12	-0.178703	8.46995e-05	0.000158198	8
WDR46	6p21.32	0.454316	3.00159e-12	1.03781e-11	8
WIZ	19p13.12	0.305913	3.19714e-07	7.52406e-07	8
WWC1	5q34	0.327013	0.00199202	0.00318609	8
XPC	3p25.1	-0.353773	7.45982e-11	2.33817e-10	8
XPO7	8p21.3	-0.30228	4.86461e-07	1.1244e-06	8
ZBED4	22q13.33	0.356617	1.14488e-07	2.79614e-07	8
ZC3H6	2q14.1	-0.674677	2.00486e-16	9.10334e-16	8
ZFP36L2	2p21	-1.43289	1.9945e-36	2.6864e-35	8
ZFYVE26	14q24.1	-0.202469	0.00153032	0.00248215	8
ZNF578	19q13.41	-1.26049	3.07627e-18	1.57717e-17	8
ZNF799	19p13.2	0.280533	0.000173119	0.000312967	8
ABCF2	7q36.1	0.239008	1.76749e-07	4.24647e-07	7
ACSL4	Xq23	-1.52883	1.98865e-39	3.11833e-38	7
ADCY4	14q12	-1.80548	2.79116e-48	7.02833e-47	7
ADD1	4p16.3	-0.394378	4.58998e-21	2.79572e-20	7
AKAP1	17q22	-0.66182	3.57428e-16	1.59797e-15	7
AKNAD1	1p13.3	-0.397584	0.00213318	0.00340082	7
ANGEL2	1q32.3	0.361572	1.27922e-09	3.65617e-09	7
ANKRD31	5q13.3	-0.425447	0.00318961	0.004982	7
APLF	2p13.3	-1.10112	2.33226e-21	1.44091e-20	7
ARHGAP28	18p11.31	-1.19393	1.04619e-13	4.01511e-13	7
ARHGEF28	5q13.2	-1.30966	8.90071e-34	1.0588e-32	7
ATF7IP	12p13.1	-0.200466	0.00197772	0.00316467	7
ATP12A	13q12.12	-1.1544	1.55944e-07	3.76595e-07	7
BBS10	12q21.2	-0.667678	1.08247e-20	6.43561e-20	7
BCHE	3q26.1	-2.38757	4.43461e-26	3.57332e-25	7
BMPR1B	4q22.3	2.87296	1.00137e-12	3.57746e-12	7
BTNL8	5q35.3	-1.19239	5.87762e-12	1.98836e-11	7
C11orf63	-	-0.947819	4.41536e-11	1.40662e-10	7
C15orf52	-	-1.44877	2.16064e-25	1.6816e-24	7
CAND1	12q14.3-q15	0.348122	3.96165e-07	9.23581e-07	7
CARM1	19p13.2	0.382067	8.12477e-11	2.54197e-10	7
CAST	5q15	-0.523051	3.13058e-16	1.40512e-15	7
CBL	11q23.3	-0.642127	3.68766e-17	1.75167e-16	7
CBWD1	9p24.3	0.210085	0.00219523	0.0034955	7
CCDC146	7q11.23	-0.240515	0.0173398	0.0244817	7
CCDC183	9q34.3	0.692557	9.67176e-11	3.00655e-10	7
CCDC57	17q25.3	0.525788	2.11421e-08	5.4895e-08	7
CCR2	3p21.31	-0.510067	0.00529781	0.00803479	7
CCT8	21q21.3	0.395977	1.4217e-11	4.68715e-11	7
CD109	6q13	-0.508619	0.000603103	0.00102591	7
CD19	16p11.2	0.704886	0.00449867	0.0068856	7
CDH6	5p13.3	-0.477001	4.63387e-06	9.83206e-06	7
CHAF1A	19p13.3	0.833288	7.91067e-26	6.27352e-25	7
CHL1	3p26.3	-3.78158	5.40688e-58	2.27468e-56	7
CHN1	2q31.1	-0.274728	0.00658455	0.00985522	7
CLASP2	3p22.3	-0.328391	2.81943e-06	6.09753e-06	7
CNPY3	6p21.1	0.667924	5.53753e-19	2.9744e-18	7
COL28A1	7p21.3	-1.34052	1.49821e-13	5.68275e-13	7
COL6A1	21q22.3	0.404374	0.0047804	0.00729133	7
COMP	19p13.11	4.86603	3.12663e-83	7.31261e-81	7
COX10	17p12	-0.190629	0.000239317	0.00042597	7
CTNND1	11q12.1	-0.167197	0.0101274	0.0147717	7
CXCR3	Xq13.1	0.94788	1.79589e-06	3.95429e-06	7
DACH2	Xq21.2	-0.949273	1.85567e-06	4.08037e-06	7
DGKB	7p21.2	-1.46219	2.79074e-20	1.6194e-19	7
DHX37	12q24.31	0.440168	4.23098e-13	1.5573e-12	7
DLGAP2	8p23.3	-2.50592	2.10779e-48	5.3515e-47	7
EBF1	5q33.3	-2.74201	6.56946e-88	2.2663e-85	7
ECD	10q22.2	0.179189	0.000167454	0.000303122	7
EDA2R	Xq12	-1.15796	3.64906e-19	1.98359e-18	7
EFCAB12	3q21.3	0.89526	8.27009e-08	2.04386e-07	7
EGFLAM	5p13.2-p13.1	-1.83715	8.30574e-62	4.36613e-60	7
EIF2B5	3q27.1	0.400704	9.73863e-19	5.14879e-18	7
ELAC2	17p12	-0.114766	0.0279692	0.0382883	7
ELF4	Xq26.1	0.273642	0.000132001	0.0002418	7
EMILIN2	18p11.32-p11.31	-1.47763	1.00062e-33	1.18826e-32	7
EML4	2p21	-0.220013	0.00057719	0.000984627	7
EPN1	19q13.42	0.543134	4.69755e-12	1.59974e-11	7
ESR1	6q25.1-q25.2	1.76692	2.03443e-17	9.83295e-17	7
ETS1	11q24.3	-1.03038	6.42281e-22	4.10696e-21	7
FANCC	9q22.32	0.287619	2.99083e-05	5.85812e-05	7
FGF18	5q35.1	0.594397	7.19482e-05	0.00013527	7
FLT3	13q12.2	0.793799	0.00217525	0.00346568	7
FOXJ3	1p34.2	-0.331987	1.71432e-10	5.2284e-10	7
GBP6	1p22.2	-0.856864	7.27865e-06	1.51353e-05	7
GOLGA2P5	12q23.1	0.490628	1.12809e-05	2.3012e-05	7
GP2	16p12.3	2.32817	1.99918e-10	6.07769e-10	7
GPAM	10q25.2	-3.33655	1.07556e-116	5.93668e-113	7
GPR97	-	-2.55045	4.20967e-42	7.62826e-41	7
GRAMD1B	11q24.1	-0.638043	2.94301e-07	6.94258e-07	7
GRIP1	12q14.3	0.376369	0.0134801	0.0192999	7
GRIP2	3p25.1	-1.63455	1.21129e-30	1.23537e-29	7
GTF2IRD2P1	7q11.23	-0.491882	7.93316e-05	0.000148675	7
HCN1	5p12	-1.49821	2.27326e-13	8.52758e-13	7
HNRNPA2B1	7p15.2	0.520168	4.01554e-35	5.1093e-34	7
HNRNPR	1p36.12	0.181072	8.46343e-06	1.75027e-05	7
IL13RA2	Xq23	-0.519942	0.00106316	0.00175748	7
INTS4	11q14.1	0.196577	0.0133108	0.0190742	7
ITGB1	10p11.22	-0.824857	6.7806e-18	3.3919e-17	7
JUP	17q21.2	0.6739	2.19784e-17	1.06005e-16	7
KANK1	9p24.3	-2.06364	9.61618e-78	1.38223e-75	7
KIF19	17q25.1	-1.58705	1.18466e-14	4.82927e-14	7
KIRREL3	11q24.2	-0.857951	2.67208e-07	6.32562e-07	7
KLHL8	4q22.1	-0.382751	1.71061e-08	4.47102e-08	7
KMO	1q43	1.28734	1.08147e-09	3.10642e-09	7
LAMC3	9q34.12	-1.59335	1.69829e-17	8.25167e-17	7
LIPE	19q13.2	-3.67359	1.35664e-68	1.08839e-66	7
LMO7	13q22.2	0.484216	2.86018e-06	6.17938e-06	7
LRRN1	3p26.2	-0.886664	0.000313675	0.000551424	7
LRRN3	7q31.1	-2.52669	1.68673e-37	2.40074e-36	7
LTF	3p21.31	-2.44059	1.06972e-09	3.07426e-09	7
MARK2	11q13.1	0.476474	1.31231e-13	5.00235e-13	7
MYO1D	17q11.2	0.487558	4.46876e-11	1.42281e-10	7
MYOCD	17p12	-2.65105	8.12734e-42	1.45365e-40	7
NEDD4	15q21.3	-0.450332	2.57401e-07	6.1013e-07	7
NEFH	22q12.2	0.608411	0.00267279	0.00421821	7
NELL2	12q12	1.75718	5.76526e-10	1.6932e-09	7
NFATC2	20q13.2	-0.961407	2.65508e-19	1.45788e-18	7
NNT	5p12	-0.215749	0.02582	0.0355172	7
NR3C2	4q31	-2.69148	3.41137e-62	1.83165e-60	7
NRG3	10q23.1	-1.41551	4.58741e-11	1.45856e-10	7
NUP210	3p25.1	1.97321	1.23738e-87	4.21595e-85	7
OAS3	12q24.13	1.18341	2.32742e-16	1.05126e-15	7
OR51E2	11p15.4	0.390792	0.0154791	0.0219907	7
OSBPL8	12q14	-0.374993	0.000620599	0.00105438	7
PAM	5q21.1	-0.990349	3.97216e-18	2.0196e-17	7
PARPBP	12q23.2	1.21238	6.09047e-31	6.31186e-30	7
PAXBP1	21q22.11	-0.220119	0.00013311	0.000243767	7
PCDHB5	5q31.3	-1.53562	7.5092e-18	3.73673e-17	7
PCDHGA9	5q31	-1.53976	1.33643e-23	9.42815e-23	7
PDE1C	7p14.3	-3.70036	3.82449e-86	1.11104e-83	7
PKP1	1q32.1	-3.36308	4.96789e-30	4.89307e-29	7
PLA2G15	16q22.1	0.306129	1.89229e-05	3.78321e-05	7
PLEKHM1	17q21.31	-0.567591	1.08251e-22	7.21971e-22	7
PLK1	16p12.2	2.842	1.00646e-75	1.29796e-73	7
PPARGC1B	5q32	-1.50909	2.41052e-35	3.09565e-34	7
PTCHD2	-	1.34589	7.94478e-09	2.13454e-08	7
PTENP1	9p13.3	-0.968556	1.19627e-21	7.51874e-21	7
PTHLH	12p11.22	-1.62396	5.72707e-12	1.93886e-11	7
PTPRH	19q13.4	-0.757653	9.57772e-05	0.00017796	7
RASGRF2	5q14.1	-1.16484	1.5419e-20	9.08679e-20	7
RBM20	10q25.2	-0.843897	0.000182235	0.000328687	7
RBM39	20q11.22	0.196728	1.49528e-05	3.01966e-05	7
RBMS3	3p24.1	-2.29597	3.85898e-63	2.22338e-61	7
RNF182	6p23	-1.63568	6.16247e-20	3.5088e-19	7
RPH3A	12q24.13	-0.760411	8.01026e-06	1.65892e-05	7
SASH1	6q24.3-q25.1	-1.5614	8.04269e-31	8.29455e-30	7
SCAF1	19q13.3-q13.4	0.654637	1.1861e-15	5.13717e-15	7
SERPINA12	14q32.13	1.45178	4.07457e-08	1.03241e-07	7
SERPINC1	1q25.1	1.25431	1.44037e-14	5.83463e-14	7
SFI1	22q12.2	0.652376	2.63401e-15	1.11991e-14	7
SIMC1	5q35.2	-0.361755	0.00131387	0.00214887	7
SLC12A3	16q13	0.430939	0.0245001	0.0338212	7
SLC12A6	15q14	-1.00447	8.99017e-32	9.76046e-31	7
SLC24A3	20p11.23	-0.588767	0.000961797	0.00159892	7
SLC9A1	1p36.11	0.375563	4.49899e-08	1.13567e-07	7
SLC9A6	Xq26.3	-1.18554	7.22093e-31	7.4582e-30	7
SLITRK5	13q31.2	-2.10056	2.69205e-15	1.14388e-14	7
SLK	10q24.33-q25.1	-0.457455	2.39374e-14	9.56735e-14	7
SMAD2	18q21.1	-0.304524	7.71909e-09	2.07633e-08	7
SMAD4	18q21.2	-0.560338	5.71659e-23	3.88109e-22	7
SMC2	9q31.1	0.319252	9.87096e-05	0.000183114	7
SMYD4	17p13.3	-0.761211	1.62529e-43	3.17668e-42	7
SOS2	14q21.3	-0.606309	2.93457e-23	2.03386e-22	7
SPTY2D1	11p15.1	0.174226	0.00623548	0.00936069	7
SRGAP3	3p25.3	-0.292228	0.00598827	0.00901064	7
STAC	3p22.3-p22.2	-2.69979	2.3701e-51	7.03333e-50	7
STON1	2p16.3	-1.42519	4.16125e-32	4.58269e-31	7
SWT1	1q25.3	-0.135759	0.0319009	0.0432906	7
TACC1	8p11.22	-1.86652	1.86987e-43	3.64182e-42	7
TICRR	15q26.1	1.31619	6.61355e-22	4.22502e-21	7
TLE3	15q23	1.08039	8.16073e-51	2.37323e-49	7
TLL2	10q24.1	1.52358	4.77048e-20	2.73315e-19	7
TMCC1	3q22.1	0.135742	0.00949614	0.0138987	7
TMEM132A	11q12.2	1.96441	5.32615e-41	9.02339e-40	7
TMTC4	13q32.3	0.475054	9.7727e-09	2.60612e-08	7
TPM3	1q21.3	1.15399	1.06564e-68	8.57422e-67	7
TRAF3IP3	1q32.2	0.422345	0.00150611	0.00244532	7
TRIB2	2p24.3	-0.405387	0.000178916	0.000322938	7
TRIM37	17q22	0.566688	3.78313e-11	1.21108e-10	7
TRMT2A	22q11.21	0.263415	0.00180901	0.00290801	7
TRPV6	7q34	-1.3985	7.83789e-07	1.77974e-06	7
TTBK2	15q15.2	-0.84858	3.05608e-31	3.21792e-30	7
TTC37	5q15	-0.243048	0.000407688	0.000707366	7
UBE4A	11q23.3	-0.514624	1.26005e-10	3.87723e-10	7
UCP2	11q13	0.613581	5.68539e-06	1.19629e-05	7
ULK2	17p11.2	-0.224344	0.00922814	0.0135251	7
USO1	4q21.1	-0.143655	0.0238498	0.0329978	7
USP11	Xp11.3	-0.273524	9.10076e-06	1.87561e-05	7
USP4	3p21.31	-0.261134	2.4151e-10	7.30513e-10	7
USP53	4q26	-1.30828	7.44416e-39	1.13317e-37	7
VSIG1	Xq22.3	0.893926	3.58716e-07	8.40109e-07	7
VWCE	11q12.2	-2.04566	3.46148e-47	8.22825e-46	7
WDR74	11q12.3	0.21473	0.00312182	0.00488468	7
ZFP28	19q13.43	-0.754724	1.60745e-12	5.66932e-12	7
ZFYVE19	15q15.1	0.530563	4.57407e-14	1.79669e-13	7
ZMYND8	20q13.12	0.607209	1.59147e-14	6.43252e-14	7
ZNF347	19q13.3	-0.299042	7.14471e-05	0.000134355	7
ZNF366	5q13.1	-1.91442	4.66409e-34	5.62832e-33	7
ZNF397	18q12.2	-0.153283	0.0213114	0.0296762	7
ZNF483	9q31.3	-1.4179	2.00775e-20	1.17518e-19	7
ZNF609	15q22.1	0.197634	0.00428576	0.00658236	7
ZNF618	9q32	-0.19836	0.00816712	0.0120675	7
ZNF700	19p13.2	0.291607	5.59328e-06	1.17781e-05	7
ZNF726	19p12	0.799347	1.53804e-08	4.03372e-08	7
SPRY3	Xq28 and Yq12	-0.793325	3.23331e-22	2.10009e-21	7
ACOT2	14q24.3	-0.222417	0.0101746	0.0148344	6
ADH5	4q23	-0.906038	7.13658e-76	9.46901e-74	6
ALCAM	3q13.11	0.674761	3.16646e-07	7.45441e-07	6
ANAPC7	12q24.11	0.495167	2.35025e-25	1.82659e-24	6
ANKRD32	-	0.352783	9.92926e-08	2.43559e-07	6
ANXA1	9q21.13	-2.7898	1.04029e-95	6.52498e-93	6
AP2B1	17q12	0.407332	3.18616e-07	7.50014e-07	6
AP4M1	7q22.1	0.611866	7.4189e-23	5.00726e-22	6
APBB1IP	10p12.1	-1.14586	2.10839e-21	1.30523e-20	6
APLP1	19q13.12	1.02981	7.53479e-07	1.71332e-06	6
APLP2	11q24.3	-0.412624	7.72411e-07	1.75506e-06	6
ARMC3	10p12.2	2.72535	2.79603e-26	2.27826e-25	6
ASB9	Xp22.2	-0.72861	6.42506e-08	1.60325e-07	6
ASIC1	12q13.12	-0.536271	0.000188995	0.000340089	6
B4GALNT2	17q21.32	0.91422	0.00247731	0.00392429	6
BAHD1	15q15.1	0.169781	0.00414884	0.00638202	6
BANK1	4q24	-1.67746	3.53232e-16	1.57973e-15	6
BCKDK	16p11.2	0.59414	3.10713e-18	1.5924e-17	6
BOC	3q13.2	-2.45305	1.75407e-53	5.7767e-52	6
C10orf55	10q22.2	-0.569691	1.1347e-05	2.31383e-05	6
C16orf96	16p13.3	-1.2083	1.5871e-19	8.82723e-19	6
C2orf47	-	0.158276	0.00095139	0.00158248	6
CAMK2A	5q32	0.697752	2.28099e-05	4.52363e-05	6
CAND2	3p25.2	-1.03281	3.94398e-12	1.35213e-11	6
CARNS1	11q13.2	-0.402768	0.000743351	0.00125183	6
CBX2	17q25.3	1.23662	1.17563e-10	3.62878e-10	6
CC2D1A	19p13.12	0.19925	0.00535199	0.00811205	6
CCDC138	2q13	0.331833	1.64501e-05	3.30703e-05	6
CCDC173	2q31.1	0.374308	0.00320609	0.00500519	6
CD96	3q13.13-q13.2	-0.468459	0.0131117	0.0188095	6
CDC25C	5q31.2	3.23114	2.7935e-91	1.22373e-88	6
CDC6	17q21.2	2.28104	1.89304e-43	3.68435e-42	6
CDC73	1q31.2	0.243385	0.000153709	0.00027947	6
CELF2	10p14	-2.0313	8.38685e-54	2.82613e-52	6
CERCAM	9q34.11	0.97271	6.89082e-22	4.40011e-21	6
CHEK2	22q12.1	0.645695	1.03042e-15	4.47906e-15	6
CIRBP	19p13.3	-0.230839	0.00334487	0.00521094	6
CKAP2	13q14.3	1.08403	4.32615e-31	4.51221e-30	6
CLCN7	16p13.3	0.650918	8.42027e-22	5.33968e-21	6
CLDN6	16p13.3	0.642512	9.20575e-05	0.000171361	6
CLN3	16p12.1	0.965762	3.23791e-31	3.40678e-30	6
COG8	16q22.1	-0.244839	2.04313e-06	4.46837e-06	6
COL11A2	6p21.32	-1.12925	1.1994e-11	3.97324e-11	6
COL4A3	2q36.3	-1.96895	2.20252e-28	2.01409e-27	6
CPEB1	15q25.2	-1.96304	4.3439e-40	6.96589e-39	6
CPSF3	2p25.1	0.346669	6.2818e-14	2.44417e-13	6
CREBRF	5q35.1	-0.939544	5.00296e-33	5.73625e-32	6
CTNNAL1	9q31.3	-1.11757	6.71647e-34	8.03473e-33	6
CXorf65	Xq13.1	0.427053	0.0096497	0.014113	6
DDR1	6p21.33	0.938127	2.8161e-28	2.55738e-27	6
DDX31	9q34.13	0.285062	3.99223e-10	1.18802e-09	6
DIS3	13q21.33	-0.421663	5.77668e-13	2.10212e-12	6
DPY19L2	12q14.2	-1.8741	1.73702e-28	1.59955e-27	6
DPY19L3	19q13.11	0.350869	2.98369e-07	7.03734e-07	6
EBF2	8p21.2	-2.03695	2.57246e-48	6.50134e-47	6
ECEL1	2q37.1	-0.830395	0.000235112	0.000418837	6
ECM2	9q22.31	-2.13173	1.07221e-45	2.36349e-44	6
EDN1	6p24.1	-2.23407	5.14425e-38	7.51966e-37	6
EFCAB13	17q21.32	-0.678134	1.49724e-08	3.93045e-08	6
EGF	4q25	-1.29309	2.15736e-07	5.14686e-07	6
EIF2AK3	2p11.2	0.303252	6.40608e-06	1.33895e-05	6
EML3	11q12.3	-0.234581	0.00106522	0.00176067	6
ENG	9q34.11	-0.539156	1.38384e-09	3.94456e-09	6
ENTPD6	20p11.21	0.517193	6.82018e-14	2.64917e-13	6
ERC2	3p14.3	-1.13371	2.99309e-11	9.64992e-11	6
EXOC7	17q25.1	-0.256113	1.66733e-05	3.35045e-05	6
EXTL3	8p21.1	-0.531312	1.49955e-13	5.68703e-13	6
EYA4	6q23.2	-1.13174	5.48045e-06	1.15493e-05	6
FAM115C	-	-0.477698	0.000163761	0.00029669	6
FAM13A	4q22.1	-2.51505	2.6838e-101	3.22032e-98	6
FAM65B	-	-1.00602	8.3533e-11	2.61051e-10	6
FBXL2	3p22.3	0.345036	1.58867e-05	3.20006e-05	6
FBXL5	4p15.32	-0.518238	4.16651e-17	1.97335e-16	6
FBXO33	14q21.1	-0.592781	1.21956e-20	7.2304e-20	6
FBXO34	14q22.3	-0.13208	0.00894391	0.01314	6
FOXJ2	12p13.31	-0.393047	1.61324e-16	7.37366e-16	6
FRMPD3	Xq22.3	1.64896	1.24176e-12	4.41169e-12	6
GAB2	11q14.1	-0.699363	5.94535e-08	1.48637e-07	6
GALNT10	5q33.2	0.569181	2.97658e-09	8.27934e-09	6
GALNT11	7q36.1	-0.269944	2.39587e-07	5.6947e-07	6
GALNT12	9q22.33	-1.48174	2.05502e-23	1.43617e-22	6
GANC	15q15.1	-0.591313	9.28226e-22	5.86474e-21	6
GBP5	1p22.2	1.29289	8.09401e-11	2.53321e-10	6
GFAP	17q21.31	-3.57821	3.56921e-50	9.96994e-49	6
GFM2	5q13.3	0.245367	3.28087e-05	6.3913e-05	6
GLE1	9q34.11	0.411057	2.70534e-15	1.14935e-14	6
GLG1	16q23.1	-0.634846	6.85972e-28	6.07557e-27	6
GLI1	12q13.3	-1.03429	5.47784e-09	1.49252e-08	6
GLS	2q32.2	-0.546039	1.38438e-11	4.56855e-11	6
GMIP	19p13.11	0.870548	1.0937e-32	1.22999e-31	6
GNAZ	22q11.22-q11.23	-0.868256	1.249e-12	4.43514e-12	6
GNB2L1	-	-0.385386	4.78696e-08	1.20583e-07	6
GNB3	12p13.31	-0.361527	0.00870154	0.0128077	6
GOLGA2	9q34.11	0.385405	5.51746e-14	2.15467e-13	6
GPAT2	2q11.2	-1.1881	5.12204e-10	1.51023e-09	6
GPR84	12q13.13	1.49606	3.60463e-23	2.48143e-22	6
GREM2	1q43	-2.52506	4.25215e-30	4.2001e-29	6
GRM6	5q35.3	-1.05749	2.52259e-13	9.42827e-13	6
GUSB	7q11.21	0.412949	7.96681e-08	1.97226e-07	6
HIST2H2AC	1q21.2	1.70599	3.52676e-24	2.56338e-23	6
HLA-DQB1	6p21.32	0.772036	1.94731e-07	4.66389e-07	6
HPX	11p15.4	1.59524	2.85503e-11	9.21773e-11	6
HS3ST5	6q21-q22.1	0.553813	0.0346406	0.0467739	6
HSD17B7P2	10p11.1	0.368061	0.00271674	0.00428266	6
HSPA5	9q33.3	0.6332	2.07499e-18	1.07501e-17	6
IGHA1	14q32.33	-1.96272	7.29099e-10	2.12209e-09	6
IGKV3D-20	2p11.2	-1.45633	1.88506e-06	4.14136e-06	6
IL12RB1	19p13.11	0.377659	0.00449366	0.00687946	6
IL32	16p13.3	0.400743	0.00441965	0.00677366	6
INPP4A	2q11.2	-0.109326	0.0292576	0.0399215	6
IQCA1	2q37.2-q37.3	-0.900263	2.86004e-06	6.17938e-06	6
IQUB	7q31.32	-0.516101	0.00410313	0.00631522	6
IRS1	2q36.3	-0.876219	8.10244e-11	2.53556e-10	6
ISLR2	15q24.1	-1.1654	1.00152e-18	5.29301e-18	6
ITGA2	5q11.2	-0.518742	0.000732758	0.00123467	6
KBTBD8	3p14.1	-0.259184	0.0356758	0.0480782	6
KCNH2	7q36.1	0.759579	0.000767721	0.00129059	6
KCNH4	17q21.2	-1.0605	2.59307e-14	1.03431e-13	6
KIAA0226L	-	-0.811703	7.34233e-13	2.64915e-12	6
KIAA0408	6q22.33	-3.68589	2.1633e-91	9.78734e-89	6
KIF1C	17p13.2	-0.676023	3.2439e-18	1.65941e-17	6
KIF5A	12q13.3	-1.14429	1.33409e-06	2.97016e-06	6
KRT83	12q13.13	-1.64637	1.55651e-13	5.89657e-13	6
LARP1B	4q28.2	0.343727	1.28541e-07	3.12304e-07	6
LARS	5q32	-0.109796	0.021985	0.030554	6
LCTL	15q22.31	0.963968	2.93305e-19	1.6048e-18	6
LIN54	4q21.22	0.158232	0.0107369	0.0155874	6
LINGO1	15q24.3	1.78051	9.85715e-19	5.21045e-18	6
LLGL2	17q25.1	1.82464	7.81493e-64	4.62825e-62	6
LMBR1L	12q13.12	-0.171822	0.00245807	0.00389537	6
LPO	17q22	-0.58095	0.000771951	0.00129707	6
LRCH3	3q29	-0.383907	7.40209e-21	4.44964e-20	6
LRGUK	7q33	0.886072	8.09404e-10	2.34568e-09	6
LRRC23	12p13.31	0.448359	1.75301e-07	4.21351e-07	6
LRRIQ4	3q26.2	0.956647	2.0969e-05	4.17594e-05	6
LSG1	3q29	0.398905	2.60878e-17	1.25125e-16	6
LYN	8q12.1	-0.682346	3.577e-13	1.32383e-12	6
MAB21L1	13q13.3	-3.0506	5.95606e-61	2.99409e-59	6
MAEL	1q24.1	0.592337	0.00255288	0.00403751	6
MAP3K9	14q24.2	0.55722	2.12783e-07	5.07859e-07	6
MAP7D2	Xp22.12	-1.21262	2.88536e-08	7.40333e-08	6
2019-03-01	1q41	-2.10461	8.85753e-49	2.29531e-47	6
MC1R	16q24.3	0.730897	2.44e-11	7.91479e-11	6
MED25	19q13.3	0.876365	3.20632e-33	3.71174e-32	6
MEF2C	5q14.3	-1.28483	1.31083e-38	1.97039e-37	6
MEPCE	7q22.1	0.127204	0.0261941	0.0359926	6
METTL2B	7q32.1	0.125816	0.015085	0.0214584	6
MFSD11	17q25.1	0.148488	0.0138964	0.0198567	6
MICU3	8p22	-2.50761	3.34208e-62	1.79795e-60	6
MMP9	20q13.12	2.48627	4.7138e-25	3.5917e-24	6
MON1B	16q23.1	-0.297379	3.38959e-07	7.95729e-07	6
MRPS18B	6p21.33	0.134088	0.0325683	0.0441381	6
MRPS27	5q13.2	-0.13156	0.00615477	0.00924505	6
MSH2	2p21-p16.3	0.279757	5.34828e-06	1.12828e-05	6
MTG1	10q26.3	0.529207	4.11631e-11	1.31423e-10	6
NEK8	17q11.1	0.640525	2.61229e-13	9.75692e-13	6
NFATC1	18q23	-0.643575	3.18272e-11	1.02398e-10	6
NFRKB	11q24.3	-0.429691	1.00161e-13	3.85098e-13	6
NHSL1	6q24.1	-0.692742	2.137e-11	6.95893e-11	6
NOD1	7p14.3	-0.885837	1.56404e-34	1.94259e-33	6
NOS3	7q36.1	-0.528642	8.54989e-08	2.11037e-07	6
NOX4	11q14.3	0.927973	1.1861e-10	3.65824e-10	6
NPHS1	19q13.12	1.32978	4.85666e-10	1.4349e-09	6
NPR1	1q21.3	-3.23586	1.39247e-95	8.53989e-93	6
NRG1	8p12	-2.76214	1.89166e-28	1.73615e-27	6
NT5C1B	2p24.2	-0.338887	0.00890819	0.0130912	6
NTN4	12q22	-1.36878	8.851e-11	2.76042e-10	6
NUMB	14q24.3	-0.346261	3.14465e-12	1.08578e-11	6
NUTM2G	9q22.33	0.242667	0.0340292	0.0460024	6
OGFR	20q13.33	0.709913	1.35916e-14	5.51699e-14	6
OPHN1	Xq12	-0.648262	9.18065e-11	2.86032e-10	6
OR13J1	9p13.3	0.767453	3.40541e-05	6.62128e-05	6
OR7C1	19p13.1	-1.81126	7.17263e-27	6.00577e-26	6
P2RY13	3q25.1	-1.19631	3.06366e-15	1.29639e-14	6
PABPC4L	4q28.3	-1.30075	2.59765e-26	2.11912e-25	6
PALM2	9q31.3	-1.05756	1.0242e-11	3.41045e-11	6
PARK2	-	-2.01601	5.96363e-48	1.48141e-46	6
PBX2P1	3q24	-0.314398	0.00363908	0.00564062	6
PCDHB13	5q31.3	-0.622502	1.9008e-05	3.79968e-05	6
PDE11A	2q31.2	-2.41632	4.50764e-43	8.59722e-42	6
PDE9A	21q22.3	-1.9691	3.25763e-50	9.1459e-49	6
PHTF2	7q11.23-q21.11	0.553913	3.77737e-15	1.59084e-14	6
PIK3C2A	11p15.1	-0.383437	4.16036e-06	8.85802e-06	6
PIP4K2C	12q13.3	0.766115	5.08954e-28	4.55303e-27	6
PIP5K1C	19p13.3	0.271211	3.54912e-07	8.31482e-07	6
PLA2G4F	15q15.1	1.76339	7.7421e-23	5.22029e-22	6
PLIN1	15q26.1	-5.31205	1.40816e-60	6.79412e-59	6
PNCK	Xq28	1.46753	5.04419e-09	1.37954e-08	6
PNLDC1	6q25.3	-0.821315	5.48406e-05	0.000104436	6
POTEI	2q21.1	1.51556	1.33741e-09	3.81536e-09	6
PPARGC1A	4p15.2	-2.76914	7.68937e-45	1.60644e-43	6
PPAT	4q12	0.681047	1.38779e-17	6.78602e-17	6
PPP1R1A	12q13.2	-4.6225	1.58587e-56	6.12982e-55	6
PPP2R5C	14q32.31	-0.200392	9.52159e-07	2.14687e-06	6
PPP5C	19q13.32	0.43007	8.17574e-19	4.34413e-18	6
PPP6R3	11q13	0.147299	0.0233359	0.0323143	6
PREB	2p23.3	0.223991	3.35829e-05	6.5352e-05	6
PRKAA1	5p13.1	-0.912826	1.44507e-22	9.57298e-22	6
PRKAR1A	17q24.2	-0.233387	0.000581497	0.000991484	6
PRKCD	3p21.1	0.712098	2.85233e-18	1.46535e-17	6
PRKX	Xp22.33	-0.699202	8.05589e-10	2.33487e-09	6
PRMT2	21q22.3	-0.351474	9.25051e-14	3.56707e-13	6
PRMT8	12p13.32	0.748546	0.000451273	0.000778876	6
PRR14	16p11.2	0.732204	9.61764e-27	8.01896e-26	6
PSMD3	17q21.1	0.793303	1.16813e-13	4.46759e-13	6
PTPRK	6q22.33	-0.522936	6.35774e-05	0.000120203	6
PYGM	11q13.1	-2.96085	2.10545e-77	2.97981e-75	6
RAE1	20q13.31	0.772644	2.94275e-27	2.5167e-26	6
RAPGEF4	2q31.1	-0.3985	0.000752961	0.00126724	6
RASEF	9q21.32	1.45147	5.74172e-21	3.47881e-20	6
RFX6	6q22.1	-2.51984	4.76752e-18	2.4142e-17	6
RGL4	22q11.23	-0.539343	2.11618e-06	4.62263e-06	6
RGS14	5q35.3	0.850577	8.55146e-15	3.52086e-14	6
RMDN2	2p22.2	-0.999426	1.11548e-32	1.25346e-31	6
RNF103	2p11.2	0.369683	2.75745e-11	8.91206e-11	6
RNLS	10q23.31	-0.878846	2.4319e-16	1.09738e-15	6
RPAP2	1p22.1	0.140418	0.026758	0.036716	6
RPS6KB2	11q13.2	0.718478	7.5946e-17	3.53987e-16	6
RUNX2	6p21.1	1.09666	1.96999e-15	8.4226e-15	6
SART1	11q13.1	0.283954	0.00260582	0.00411793	6
SART3	12q23.3	0.139988	0.000398348	0.00069206	6
SCIN	7p21.3	0.501958	0.018921	0.0265646	6
SEC24D	4q26	0.749866	1.78923e-17	8.68128e-17	6
SEC31B	10q24.31	-0.889974	1.23521e-11	4.08893e-11	6
SEMA6D	15q21.1	-2.29685	1.20416e-38	1.814e-37	6
SFMBT1	3p21.1	0.206216	0.00317677	0.00496334	6
SGK2	20q13.12	-2.74982	2.52581e-45	5.4544e-44	6
SHISA4	1q32.1	0.379495	5.12295e-05	9.78837e-05	6
SLC15A1	13q32.2-q32.3	-1.41345	1.95235e-09	5.50593e-09	6
SLC26A3	7q22.3-q31.1	-1.98753	1.17476e-11	3.89254e-11	6
SLC36A1	5q33.1	0.212862	0.0185642	0.0261035	6
SLC38A7	16q21	0.37731	4.7738e-09	1.3078e-08	6
SLC39A6	18q12.2	1.44502	9.40466e-16	4.10291e-15	6
SLC45A2	5p13.2	1.1486	7.5703e-15	3.12435e-14	6
SLC7A14	3q26.2	-3.04513	1.5451e-71	1.46033e-69	6
SLC9A9	3q24	-1.50977	2.95742e-40	4.81811e-39	6
SLCO1A2	12p12.1	-4.25864	1.8085e-57	7.32907e-56	6
SLCO3A1	15q26.1	-1.01928	4.76635e-17	2.24973e-16	6
SLFN12L	17q12	-0.951056	3.58738e-08	9.12568e-08	6
SLMAP	3p14.3	-0.366484	1.20696e-07	2.94229e-07	6
SMARCAL1	2q35	0.12558	0.000369505	0.000644194	6
SNRK	3p22.1	-0.764981	6.4366e-34	7.7133e-33	6
SOX6	11p15.3	-2.38654	3.68619e-40	5.93186e-39	6
SRC	20q11.23	0.66923	9.78115e-16	4.26042e-15	6
ST5	11p15	-0.851513	1.07052e-19	6.00737e-19	6
STAT5B	17q21.2	-1.21554	6.27339e-55	2.23397e-53	6
SULF1	8q13.2-q13.3	1.50574	1.85042e-23	1.29647e-22	6
SYT2	1q32.1	-1.22498	1.15119e-17	5.65813e-17	6
SYTL3	6q25.3	-0.594989	3.96785e-11	1.26859e-10	6
SYTL5	Xp11.4	1.13378	1.90169e-05	3.80117e-05	6
TACR1	2p12	-3.80452	4.40324e-55	1.57819e-53	6
TAF4B	18q11.1	-1.22511	7.45521e-22	4.74732e-21	6
TAOK1	17q11.2	-0.247142	0.00552033	0.00834932	6
TAS2R3	7q34	-0.659968	0.000108447	0.000200262	6
TASP1	20p12.1	-0.207839	0.000102676	0.000190114	6
TBC1D5	3p24.3	-0.578423	1.3584e-19	7.58274e-19	6
TCP11	6p21.31	-1.22206	2.15937e-12	7.5436e-12	6
TENC1	-	-1.37715	1.88727e-53	6.20058e-52	6
TES	7q31.2	-0.654396	9.22262e-11	2.87308e-10	6
TGM5	15q15.2	-2.47468	1.54394e-23	1.08726e-22	6
THAP9	4q21.22	-0.181312	0.00221772	0.0035309	6
THSD4	15q23	0.664973	5.9394e-05	0.000112672	6
TM6SF2	19p13.11	0.494051	0.000336457	0.000589371	6
TMCO3	13q34	0.421545	2.39337e-07	5.68926e-07	6
TMEM120B	12q24.31	-0.191267	0.00974827	0.0142466	6
TMEM242	6q25.3	-0.49131	6.60994e-20	3.75584e-19	6
TMEM63C	14q24.3	2.26066	2.28044e-37	3.21896e-36	6
TNKS	8p23.1	-0.355365	3.39564e-06	7.28433e-06	6
TRIM28	19q13.4	0.638461	3.10282e-20	1.79521e-19	6
TRIM66	11p15.4	-0.457683	1.05652e-06	2.37171e-06	6
TRIM9	14q22.1	-1.12084	1.43957e-09	4.09792e-09	6
TSC1	9q34	-0.439366	1.5498e-14	6.26687e-14	6
TTC21B	2q24.3	-0.537806	2.70954e-11	8.76233e-11	6
TTC7A	2p21	-0.442348	1.11342e-09	3.19385e-09	6
TUB	11p15.4	-1.51528	2.13764e-24	1.56817e-23	6
TUBB8	10p15.3	1.58773	1.9239e-20	1.1273e-19	6
UGT2B4	4q13.3	-1.05138	0.00183364	0.0029459	6
ULBP2	6q25.1	0.451506	0.00473408	0.00722549	6
UMOD	16p12.3	0.849252	0.000523794	0.000897979	6
USP47	11p15.3	-0.271496	3.7345e-08	9.49032e-08	6
USP7	16p13.2	0.367054	1.40508e-13	5.3405e-13	6
UXS1	2q12.2	0.156024	0.00247816	0.0039254	6
VEZT	12q22	0.268477	9.40772e-06	1.93555e-05	6
VPS45	1q21.2	0.428446	7.08263e-15	2.92878e-14	6
VPS53	17p13.3	-0.247538	1.96069e-06	4.29726e-06	6
WDR47	1p13.3	-0.240125	0.000331316	0.000580955	6
WNK2	9q22.31	-0.652413	4.01859e-05	7.75344e-05	6
WWP1	8q21.3	0.669683	1.51975e-09	4.31725e-09	6
XAB2	19p13.3	0.265639	0.000505073	0.000867609	6
XRCC4	5q14.2	0.370467	8.18739e-12	2.75254e-11	6
YME1L1	10p12.1	0.210518	6.26361e-05	0.000118505	6
ZBTB49	4p16.3	-0.419537	1.56508e-15	6.73001e-15	6
ZMYND10	3p21.31	2.57852	2.48294e-49	6.6271e-48	6
ZNF180	19q13.2	-0.144623	0.00909714	0.0133489	6
ZNF268	12q24.33	-0.369644	1.4845e-05	2.99878e-05	6
ZNF285	19q13.31	-0.404509	0.0035618	0.00552891	6
ZNF330	4q31.21	-0.368226	8.05857e-18	4.00001e-17	6
ZNF362	1p35.1	-0.211147	7.73395e-05	0.00014505	6
ZNF492	19p13.11	-0.850776	0.000151672	0.000275892	6
ZNF521	18q11.2	-1.52198	5.39222e-26	4.32349e-25	6
ZNF548	19q13.43	-0.252109	8.71584e-05	0.000162626	6
ZNF586	19q13.43	0.351521	1.63784e-06	3.61986e-06	6
ZNF606	19q13.43	0.401674	3.78716e-06	8.08463e-06	6
ZNF677	19q13.42	-1.95018	7.0308e-42	1.25916e-40	6
ZNF778	16q24.3	-0.83582	1.04756e-25	8.26489e-25	6
ZNF791	19p13.13	-0.284291	4.63816e-09	1.27152e-08	6
ZNF808	19q13.41	-0.136358	0.0313656	0.042604	6
ZNRF3	22q12.1	-0.385398	0.0153298	0.0217864	6
A1CF	10q11.23	-0.35742	0.0286274	0.0391389	5
ABCD1	Xq28	0.40616	1.31923e-05	2.67647e-05	5
ABO	9q34.2	-1.89504	1.07789e-17	5.30451e-17	5
ABTB2	11p13	-0.402753	0.00297619	0.00467005	5
ACKR3	2q37.3	-1.24708	3.0363e-20	1.7582e-19	5
ACO1	9p21.1	-1.43177	3.79687e-55	1.36618e-53	5
ACOT4	14q24.3	1.04639	3.80285e-18	1.93601e-17	5
ACRBP	12p13.31	0.448317	1.71741e-06	3.78874e-06	5
ACRC	-	-0.56072	4.22919e-09	1.16252e-08	5
ACSL5	10q25.2	-1.40611	1.44627e-27	1.26111e-26	5
ACTR2	2p14	0.358457	2.15834e-10	6.54785e-10	5
ADAMTS4	1q23.3	1.15278	4.67717e-16	2.07759e-15	5
ADAR	1q21.3	0.815418	3.12118e-32	3.45383e-31	5
ADCYAP1R1	7p14.3	-3.10989	1.03906e-66	7.42899e-65	5
AFAP1L1	5q32	-1.31749	4.09832e-43	7.86001e-42	5
AGBL5	2p23.3	-0.191867	0.000916521	0.00152733	5
AGGF1	5q13.3	0.198766	4.3484e-05	8.3617e-05	5
AJAP1	1p36.32	-1.32183	6.72055e-16	2.95293e-15	5
ALDH3B1	11q13.2	0.291769	0.00461938	0.00705783	5
ALDH3B2	11q13.2	1.24358	7.51552e-06	1.56009e-05	5
ANGPTL3	1p31.3	-0.506192	0.00210098	0.003352	5
ANKRD40	17q21.33	-0.65565	8.79407e-18	4.35256e-17	5
ANXA11	10q22.3	-0.433434	5.53862e-12	1.87667e-11	5
ANXA6	5q33.1	-0.279369	0.000355955	0.000621789	5
AP5Z1	7p22.1	0.554552	2.75179e-13	1.02627e-12	5
APEH	3p21.31	0.638018	2.30149e-20	1.34199e-19	5
APOL2	22q12.3	0.320991	0.000155349	0.000282247	5
ARHGAP20	11q22.3-q23.1	-3.22196	1.36968e-87	4.60981e-85	5
ARHGAP39	8q24.3	1.65908	9.2317e-61	4.57408e-59	5
ARHGEF10	8p23.3	-1.13239	3.5752e-40	5.75661e-39	5
ARHGEF25	12q13.3	-0.829646	7.86908e-20	4.4484e-19	5
ARHGEF39	9p13.3	1.3034	1.0829e-32	1.21883e-31	5
ARID3B	15q24.1	0.210413	0.000853328	0.00142694	5
ASPA	17p13.2	-3.3134	9.84281e-79	1.55224e-76	5
ATF3	1q32.3	-2.5268	2.60822e-40	4.26179e-39	5
ATF4	22q13.1	-0.301783	1.10231e-05	2.25144e-05	5
ATG14	14q22.3	-0.414325	1.02093e-15	4.44128e-15	5
ATG16L2	11q13.4	0.407934	0.000454728	0.000784594	5
ATP5A1	-	-0.173287	0.00306855	0.00480705	5
ATP8A1	4p13	-1.09793	2.42167e-14	9.67475e-14	5
ATP8B4	15q21.2	-1.26568	1.51948e-29	1.46727e-28	5
AURKA	20q13.2	2.50629	2.00837e-64	1.254e-62	5
AXIN2	17q24.1	-0.680749	1.07887e-10	3.33835e-10	5
BANP	16q24.2	0.2675	3.50384e-06	7.50769e-06	5
BCL2L13	22q11.21	-0.339476	7.19584e-09	1.9405e-08	5
BCL6B	17p13.1	-0.687535	3.20351e-13	1.18943e-12	5
BDKRB2	14q32.2	-0.53965	1.99269e-06	4.36358e-06	5
BLMH	17q11.2	0.323841	0.00218294	0.00347734	5
BRD3	9q34.2	0.203936	0.00216121	0.00344411	5
BRD7	16q12.1	-0.230871	2.64935e-05	5.21852e-05	5
BRDT	1p22.1	0.607914	0.0196025	0.0274586	5
BTRC	10q24.32	0.291366	0.000482258	0.000830329	5
C11orf84	-	0.7228	8.68334e-21	5.19607e-20	5
C16orf70	16q22.1	0.211691	0.00101071	0.0016754	5
C1orf112	1q24.2	1.03051	8.89497e-37	1.21587e-35	5
C20orf194	20p13	-1.18782	1.59319e-53	5.26574e-52	5
C7orf31	7p15.3	-1.20837	4.03285e-26	3.25625e-25	5
C9orf72	9p21.2	-0.791018	9.53244e-22	6.0173e-21	5
CACNB2	10p12	-0.527227	0.00122233	0.00200629	5
CACNB3	12q13.12	1.32355	2.35741e-42	4.346e-41	5
CALHM2	10q24.33	-0.187487	0.0120831	0.0174199	5
CAPN10	2q37.3	0.335614	0.000129571	0.000237506	5
CAPN3	15q15.1	-1.67322	1.22223e-30	1.24515e-29	5
CAPN8	1q41	0.978857	0.000221436	0.000395444	5
CCDC125	5q13.2	0.849557	6.35632e-26	5.07733e-25	5
CCDC30	1p34.2	0.376582	4.9703e-05	9.50525e-05	5
CCDC78	16p13.3	3.44654	1.58722e-65	1.03556e-63	5
CCND3	6p21.1	-0.442859	5.6489e-12	1.9131e-11	5
CCNF	16p13.3	1.57215	1.13044e-60	5.52176e-59	5
CD101	1p13.1	0.368976	0.000239671	0.000426546	5
CD200R1	3q13.2	-1.03721	2.91221e-12	1.00779e-11	5
CD244	1q23.3	-0.968702	6.06522e-11	1.91267e-10	5
CD2AP	6p12.3	0.390211	1.06868e-07	2.61374e-07	5
CDC14A	1p21.2	-1.11706	3.56417e-12	1.22648e-11	5
CDHR3	7q22.3	-0.513167	0.00732864	0.0108968	5
CDKAL1	6p22.3	-0.129376	0.00745352	0.0110688	5
CDKL1	14q21.3	-0.683221	5.91578e-10	1.73334e-09	5
CDO1	5q22.3	-3.63624	5.66233e-64	3.38978e-62	5
CDS2	20p12.3	-0.384005	3.49138e-09	9.66161e-09	5
CELF1	11p11.2	0.0938313	0.0141497	0.0202009	5
CEP85L	6q22.31	-1.25416	1.818e-29	1.75003e-28	5
CHAMP1	13q34	-0.168494	0.0200555	0.028039	5
CHKB	22q13.33	-0.302213	0.00195215	0.00312484	5
CHML	1q43	0.514424	1.43572e-06	3.18898e-06	5
CHRD	3q27.1	1.00581	1.31377e-07	3.18972e-07	5
CHST2	3q24	-1.404	3.92996e-37	5.45844e-36	5
CLCNKB	1p36.13	-1.62704	4.54363e-21	2.76994e-20	5
CMTR1	6p21.2	0.122743	0.00794725	0.0117627	5
CNOT2	12q15	0.135061	0.00708224	0.010556	5
CNTFR	9p13.3	-3.96582	9.63211e-41	1.6033e-39	5
COLEC12	18p11.32	-0.769724	1.86793e-06	4.1057e-06	5
CORO1C	12q24.11	-0.663421	7.22993e-22	4.60812e-21	5
CPT2	1p32.3	0.190547	0.000990142	0.00164297	5
CRHR2	7p14.3	-1.67946	7.26346e-28	6.42491e-27	5
CSF1R	5q32	-0.512625	5.4385e-06	1.14644e-05	5
CTNNB1	3p22.1	-0.40849	1.45577e-10	4.46009e-10	5
CXorf36	Xp11.3	-2.0044	3.20168e-70	2.85032e-68	5
CYP21A2	6p21.33	2.1712	1.46014e-22	9.67052e-22	5
DAB1	1p32.2	-0.541054	0.0102169	0.0148927	5
DAZAP1	19p13.3	0.450719	5.65382e-19	3.0345e-18	5
DBR1	3q22.3	0.158117	0.000341	0.000596989	5
DCAF4L1	4p13	0.312379	0.0176503	0.0248985	5
DCAF5	14q24.1	-0.243376	5.03325e-07	1.16212e-06	5
DCAF8	1q23.2	0.113961	0.0308331	0.0419282	5
DDX23	12q13.12	0.382366	3.70895e-15	1.5625e-14	5
DENND1C	19p13.3	1.0489	4.59124e-34	5.54283e-33	5
DEPDC1	1p31.3	2.68574	1.37793e-60	6.65992e-59	5
DET1	15q26.1	-0.449305	1.74597e-13	6.5944e-13	5
DHCR24	1p32.3	0.849063	8.87916e-15	3.65142e-14	5
DHRS7	14q23.1	0.29837	0.000137056	0.000250645	5
DNAJB4	1p31.1	-1.52534	1.54693e-62	8.58996e-61	5
DNAJB5	9p13.3	-0.322541	0.000139784	0.000255362	5
DNAJC16	1p36.21	0.13404	0.0229921	0.0318654	5
DNASE1L3	3p14.3	-3.2453	2.49625e-49	6.65619e-48	5
DNASE2	19p13.13	0.776844	1.84581e-33	2.16493e-32	5
DPAGT1	11q23.3	0.307318	2.87578e-06	6.2121e-06	5
DPYD	1p21.3	-1.50288	6.74465e-37	9.27448e-36	5
DRD2	11q23.2	-3.28241	4.5292e-41	7.70634e-40	5
DSG1	18q12.1	-4.48065	1.45466e-43	2.85329e-42	5
DTX3L	3q21.1	0.744338	9.25999e-23	6.20284e-22	5
DYRK2	12q15	0.242693	0.0015151	0.00245891	5
E2F1	20q11.22	2.14365	5.09102e-48	1.26921e-46	5
EARS2	16p12.2	0.69453	1.96202e-26	1.61298e-25	5
ECHDC1	6q22.33	-1.38166	4.67666e-41	7.95234e-40	5
EDAR	2q13	-3.21317	1.48718e-45	3.24967e-44	5
EEPD1	7p14.2	-1.64624	8.07016e-62	4.25039e-60	5
EFCAB7	1p31.3	-0.147429	0.0248624	0.034287	5
EHD2	19q13.33	-1.65333	1.52456e-49	4.11692e-48	5
ELAVL1	19p13.2	0.502068	4.4044e-43	8.42945e-42	5
EML1	14q32.2	-0.599504	7.28175e-09	1.96232e-08	5
EPDR1	7p14.1	-1.76481	2.29831e-33	2.68311e-32	5
EPHA2	1p36.13	-1.544	5.49037e-49	1.43624e-47	5
EPHX2	8p21.2-p21.1	-0.724637	1.99296e-07	4.7699e-07	5
EPYC	12q21.33	4.21905	7.14999e-38	1.03746e-36	5
ERG	21q22.2	-1.66938	1.59821e-54	5.57617e-53	5
EVC	4p16.2	-0.702945	6.31266e-09	1.71305e-08	5
FAM129A	1q25.3	-1.39717	3.96169e-17	1.8786e-16	5
FAM49A	2p24.2	-2.02538	7.6709e-72	7.45428e-70	5
FAM63A	-	0.629638	2.28553e-12	7.9712e-12	5
FAM73A	-	-0.32895	0.000111692	0.000205951	5
FANK1	10q26.2	1.01536	1.50157e-12	5.30336e-12	5
FBXO15	18q22.3	0.550672	0.000260449	0.00046156	5
FBXO30	6q24.3	-0.343562	2.34864e-05	4.6521e-05	5
FCRL4	1q23.1	1.89583	1.88276e-25	1.46864e-24	5
FERMT2	14q22.1	-1.75539	1.13924e-60	5.55488e-59	5
FIP1L1	4q12	0.187851	1.88374e-06	4.13913e-06	5
FLT3LG	19q13.33	-0.375518	0.000392695	0.000682426	5
FSD2	15q25.2	-0.831911	3.10294e-08	7.93863e-08	5
G6PD	Xq28	0.523478	1.75332e-08	4.57917e-08	5
GABRG3	15q12	-2.49907	6.01448e-25	4.5526e-24	5
GAK	4p16.3	0.642336	2.20993e-23	1.54287e-22	5
GALNT6	12q13.13	1.83384	8.06824e-24	5.75814e-23	5
GALNT7	4q34.1	1.27112	1.60745e-24	1.18458e-23	5
GAS8	16q24.3	0.220595	0.00351217	0.00545832	5
GCKR	2p23.3	-0.798778	1.64952e-08	4.31789e-08	5
GFM1	3q25.32	0.218098	0.000239148	0.000425697	5
GGT1	22q11.23	0.547516	0.00483305	0.00736676	5
GNAO1	16q13	-0.476148	0.0178116	0.0251183	5
GNS	12q14.3	-0.314333	3.31557e-06	7.11864e-06	5
GPA33	1q24.1	0.499808	0.000871244	0.00145548	5
GPC3	Xq26.2	-3.33479	2.64011e-48	6.66011e-47	5
GPHN	14q23.3	-0.468405	5.73274e-06	1.20552e-05	5
GPLD1	6p22.3	-2.59875	6.40966e-60	3.0084e-58	5
GPR114	-	-0.707221	9.26624e-05	0.000172408	5
GPR124	-	-1.44673	4.24493e-33	4.88335e-32	5
GPR141	7p14.1	1.36916	7.07251e-17	3.30434e-16	5
GPR61	1p13.3	-0.319843	0.00836012	0.0123368	5
GPR83	11q21	-0.996377	1.56584e-08	4.10468e-08	5
GRIK4	11q23.3	0.918219	1.63093e-06	3.60545e-06	5
GRIK5	19q13.2	-1.21311	7.80274e-16	3.41701e-15	5
GRM2	3p21.2	0.3722	0.00382508	0.00591331	5
GSK3A	19q13.2	0.522397	1.38182e-20	8.17132e-20	5
GSN	9q33.2	-2.31677	1.72087e-89	6.5962e-87	5
GTPBP4	10p15.3	0.304344	5.44079e-07	1.2539e-06	5
GUSBP11	22q11.23	-0.515342	6.15245e-07	1.41085e-06	5
GVINP1	11p15.4	-1.10445	2.07851e-10	6.31192e-10	5
HABP4	9q22.32	-1.17559	5.46072e-41	9.24003e-40	5
HACL1	3p25.1	-0.426919	1.92543e-13	7.25138e-13	5
HADHA	2p23.3	-0.604748	5.66194e-37	7.809e-36	5
HAUS8	19p13.11	0.582849	1.1294e-14	4.61355e-14	5
HCRTR1	1p35.2	-1.65607	5.76378e-34	6.92808e-33	5
HEATR3	16q12.1	0.391691	1.34913e-08	3.55347e-08	5
HEATR6	17q23.1	0.456111	2.2691e-07	5.40456e-07	5
HEPACAM2	7q21.2	-1.52253	1.7962e-06	3.95464e-06	5
HGFAC	4p16.3	0.850727	4.05479e-05	7.81944e-05	5
HHAT	1q32.2	0.801817	8.75908e-18	4.33602e-17	5
HID1	17q25.1	1.54397	9.60161e-38	1.38301e-36	5
HIRIP3	16p11.2	0.643354	7.90269e-12	2.65941e-11	5
HIST2H2BE	1q21.2	1.67882	3.56317e-26	2.88546e-25	5
HMG20A	15q24.3	-0.251368	0.000521818	0.000895036	5
HOXA3	7p15.2	-2.64316	6.12521e-55	2.18403e-53	5
HSDL2	9q32	-0.574677	2.41527e-12	8.40882e-12	5
IBSP	4q22.1	5.12962	9.06006e-74	9.92221e-72	5
ICA1L	2q33.2	-0.626223	4.16257e-07	9.67708e-07	5
IDH1	2q34	-0.535116	1.60188e-08	4.19638e-08	5
IFIH1	2q24.2	0.372146	0.00106992	0.00176822	5
IFT81	12q24.11	0.288265	1.78853e-05	3.58485e-05	5
IGHM	14q32.33	-0.742651	0.0240153	0.0331968	5
IGHV3-49	14q32.33	-1.3312	4.7079e-05	9.03097e-05	5
IKBKB	8p11.21	0.400543	3.95922e-06	8.44214e-06	5
IL1R2	2q11.2	-0.884815	5.92673e-07	1.36101e-06	5
ILK	11p15.4	-0.3047	7.3171e-05	0.000137484	5
ILVBL	19p13.12	0.305478	0.000795618	0.00133456	5
INPP5D	2q37.1	-0.697214	6.51828e-11	2.04958e-10	5
INTS12	4q24	0.211172	3.45167e-06	7.39993e-06	5
INTU	4q28.1	-0.624622	6.17921e-12	2.0886e-11	5
IQCD	12q24.13	1.29821	1.54356e-39	2.43424e-38	5
IQCH	15q23	0.446346	3.67328e-06	7.85671e-06	5
IRAK3	12q14.3	-1.63512	5.86532e-23	3.97717e-22	5
ITGA7	12q13.2	-3.20758	1.30544e-76	1.78354e-74	5
ITGB3	17q21.32	-1.15219	2.85333e-15	1.20926e-14	5
JADE1	4q28.2	-1.10976	3.90675e-52	1.20333e-50	5
JMJD8	16p13.3	0.581452	3.40311e-16	1.52318e-15	5
KCNA7	19q13.33	-0.553257	3.63974e-05	7.05304e-05	5
KCNAB2	1p36.31	0.360636	0.000363417	0.000634102	5
KCNK13	14q32.11	0.535442	0.000208226	0.000373036	5
KCNN2	5q22.3	0.51396	9.09902e-06	1.87539e-05	5
KCNS3	2p24.2	0.811774	5.79981e-10	1.70244e-09	5
KIAA1045	-	-2.6861	6.14625e-49	1.60325e-47	5
KIAA1524	-	1.33281	7.83314e-28	6.91109e-27	5
KIF11	10q23.33	2.15758	1.15041e-65	7.55927e-64	5
KIF3B	20q11.21	0.375453	2.25246e-09	6.31933e-09	5
KIFAP3	1q24.2	0.337676	1.51261e-09	4.2983e-09	5
KLC3	19q13.32	0.487299	0.0035405	0.00549863	5
KLF11	2p25.1	-1.42465	5.15427e-63	2.939e-61	5
KLF7	2q33.3	-1.08963	5.12043e-21	3.11263e-20	5
KLHL34	Xp22.12	-0.596493	0.000174453	0.000315316	5
KLK5	19q13.41	-4.16182	5.28121e-27	4.46952e-26	5
KRT18	12q13.13	2.25427	5.40881e-56	2.03091e-54	5
KRT32	17q21.2	-0.56573	0.019826	0.0277379	5
KRT5	12q13.13	-4.39635	1.78582e-26	1.4734e-25	5
KRTAP5-10	11q13.4	0.933023	6.15606e-07	1.41122e-06	5
KSR1	17q11.2	-1.01254	2.26865e-21	1.40225e-20	5
LAS1L	Xq12	0.386052	1.36933e-12	4.84995e-12	5
LATS1	6q25.1	-0.398225	1.27584e-07	3.10171e-07	5
LDB3	10q23.2	-1.47029	4.09589e-27	3.48132e-26	5
LLGL1	17p11.2	-0.154945	0.0181304	0.0255391	5
LMNB2	19p13.3	1.06904	2.64109e-39	4.12266e-38	5
LMTK3	19q13.33	1.49097	5.89205e-18	2.96732e-17	5
LOXL2	8p21.3	0.290209	0.0184498	0.0259573	5
LRIF1	1p13.3	0.378185	4.2763e-07	9.93079e-07	5
LRRC31	3q26.2	1.53904	4.82188e-05	9.23358e-05	5
LRRC37A2	17q21.31	-0.377203	0.000154564	0.000280913	5
LRRC66	4q12	-0.979035	1.52076e-10	4.65092e-10	5
LRRFIP2	3p22.2	0.224691	0.00194277	0.00311145	5
MAN1A2	1p12	-0.272961	0.000175238	0.000316672	5
MAP7	6q23.3	0.876315	1.7245e-20	1.01369e-19	5
MAST3	19p13.11	-0.140794	0.0234438	0.0324588	5
MASTL	10p12.1	0.441382	2.68459e-09	7.49059e-09	5
MBD3	19p13	0.239929	0.00514789	0.00781902	5
ME3	11q14.2	-1.07933	1.04831e-15	4.55324e-15	5
MEPE	4q22.1	0.88846	2.86056e-05	5.61293e-05	5
MEX3C	18q21.2	-0.587479	7.9109e-18	3.92742e-17	5
MGAT4B	5q35.3	0.592509	8.53935e-27	7.13068e-26	5
MGEA5	10q24.32	-0.159301	0.000926378	0.0015432	5
MICALCL	11p15.3	1.00967	7.68328e-10	2.23156e-09	5
MIER1	1p31.3	-0.243262	5.73366e-05	0.000108987	5
MMP14	14q11.2	0.956866	1.56235e-13	5.91789e-13	5
MMP3	11q22.2	2.13356	2.61608e-17	1.25454e-16	5
MROH1	8q24.3	0.617134	1.6555e-13	6.26298e-13	5
MSN	Xq12	-0.803371	3.95223e-21	2.4158e-20	5
MTMR9	8p23.1	-0.499591	5.30898e-13	1.93934e-12	5
MUC15	11p14.3	-3.73517	4.82638e-22	3.10993e-21	5
MUC5AC	11p15.5	1.2752	1.60861e-05	3.23786e-05	5
MYCT1	6q25.2	-1.8617	1.12837e-62	6.35527e-61	5
N4BP1	16q12.1	-0.339109	1.84936e-09	5.22509e-09	5
NAP1L3	Xq21.32	-0.862632	2.12925e-11	6.93451e-11	5
NAP1L4	11p15.4	0.348959	1.7634e-13	6.6584e-13	5
NCAM2	21q21.1	0.833896	8.85799e-05	0.000165166	5
NDC1	1p32.3	0.377815	8.99597e-08	2.21552e-07	5
NETO1	18q22.3	1.01844	0.000115388	0.00021254	5
NFE2L2	2q31.2	-0.553662	4.63382e-22	2.98865e-21	5
NFKBIZ	3q12.3	-1.15655	5.93341e-09	1.61219e-08	5
NFX1	9p12	-0.135864	0.00334319	0.00520861	5
NKAPL	6p22.1	-2.74969	3.80573e-88	1.36403e-85	5
NOL8	9q22.31	0.10957	0.0187069	0.0262855	5
NPNT	4q24	1.69342	3.20766e-22	2.08392e-21	5
NT5C3A	7p14.3	0.388092	1.66078e-09	4.70722e-09	5
NTM	11q25	0.372127	0.00352254	0.00547321	5
NXN	17p13.3	-0.71595	5.10151e-09	1.39398e-08	5
OLFM4	13q14.3	-4.45278	1.40993e-27	1.22982e-26	5
OMA1	1p32.2-p32.1	0.188742	0.0018544	0.00297701	5
OPLAH	8q24.3	0.437252	0.00109652	0.00180937	5
PABPC1L	20q13.12	0.610067	2.31848e-05	4.595e-05	5
PALD1	10q22.1	-0.35639	9.51881e-05	0.000176926	5
PALLD	4q32.3	-0.45868	4.88903e-06	1.03528e-05	5
PANK4	1p36.32	0.147248	0.00686269	0.0102465	5
PAPLN	14q24.2	-0.948812	8.57128e-13	3.07688e-12	5
PARP3	3p21.2	-0.433364	1.49789e-07	3.62335e-07	5
PAX6	11p13	-0.551694	4.26934e-11	1.36167e-10	5
PBX1	1q23.3	0.732976	4.35164e-12	1.48561e-11	5
PCCA	13q32.3	-1.03655	9.43025e-39	1.42919e-37	5
PCDH12	5q31.3	-0.343121	3.91819e-05	7.56978e-05	5
PCDHB3	5q31.3	-1.34429	1.4376e-13	5.46109e-13	5
PCDHB4	5q31.3	-1.55275	3.98745e-26	3.22148e-25	5
PCDHGA8	5q31.3	-0.600348	0.0032167	0.00502061	5
PCDHGB2	5q31	-1.00767	4.82623e-08	1.21528e-07	5
PCDHGC3	5q31.3	-1.29664	2.82873e-18	1.4538e-17	5
PCED1A	20p13	0.28021	0.00050549	0.000868271	5
PCGF6	10q24.33	-0.253497	2.82916e-06	6.11762e-06	5
PCK1	20q13.31	-5.19004	4.33342e-46	9.71517e-45	5
PCSK1	5q15	0.732466	0.0115204	0.0166539	5
PDHA1	Xp22.12	-0.391047	4.79274e-12	1.63075e-11	5
PDIA4	7q36.1	0.966813	6.96668e-39	1.06401e-37	5
PDS5A	4p14	0.12646	0.0292029	0.0398551	5
PENK	8q12.1	-4.02217	6.9723e-50	1.92422e-48	5
PGBD2	1q	0.217669	0.000600598	0.00102191	5
PGM2	4p14	0.214315	0.000539898	0.000923808	5
PHACTR2	6q24.2	-1.00493	1.27541e-23	9.00913e-23	5
PIBF1	13q21.33-q22.1	-0.22708	0.000417102	0.000722836	5
PIGN	18q21.33	0.190163	0.00650259	0.00973995	5
PITPNC1	17q24.3	-0.484916	3.34371e-07	7.85359e-07	5
PKN3	9q34.11	-0.894656	9.60366e-20	5.4013e-19	5
PKNOX2	11q24.2	-2.28246	1.38963e-29	1.34423e-28	5
PKP2	12p11.21	-0.540656	6.42851e-05	0.000121433	5
PLA1A	3q13.33	0.569183	0.000234903	0.000418519	5
PLIN2	9p22.1	-1.2544	3.41812e-25	2.62621e-24	5
PNPT1	2p16.1	0.221186	0.000147063	0.00026803	5
POLN	4p16.3	-0.317087	0.010817	0.015697	5
POLR2J	7q22.1	0.665057	1.94974e-14	7.83589e-14	5
POLR3E	16p12.2	0.377695	4.33637e-12	1.48076e-11	5
POLR3GL	1q21.1	-0.486212	3.88243e-11	1.242e-10	5
POLRMT	19p13.3	0.43434	5.12107e-09	1.39904e-08	5
POU5F1	6p21.33	-0.962714	1.33328e-14	5.41355e-14	5
PPARG	3p25.2	-2.95014	1.35725e-71	1.2961e-69	5
PPFIA4	1q32.1	0.66433	0.000770926	0.00129566	5
PPM1D	17q23.3	-0.383263	1.00104e-05	2.05374e-05	5
PPM1E	17q24.2	0.91595	9.3719e-06	1.92875e-05	5
PPP1R15B	1q32.1	-0.160115	0.00689803	0.0102954	5
PPP1R21	2p16.3	-0.294066	1.06568e-14	4.36296e-14	5
PPP2R4	-	0.91579	1.18755e-42	2.21445e-41	5
PRDM11	11p11.2	-1.23829	6.03439e-54	2.04843e-52	5
PRF1	10q22.1	-0.930695	3.82725e-08	9.71706e-08	5
PROCR	20q11.22	-0.844649	1.09702e-17	5.39576e-17	5
PROKR1	2p13.3	-3.45188	3.86757e-59	1.72994e-57	5
PSMA3	14q23.1	0.390744	3.55243e-10	1.06104e-09	5
PTBP3	9q32	0.520755	1.31309e-14	5.33312e-14	5
PTCD1	7q22.1	0.400054	1.48803e-09	4.23149e-09	5
PTPN4	2q14.2	-0.769362	6.92723e-29	6.49822e-28	5
PTPN5	11p15.1	-1.02832	1.18128e-09	3.38324e-09	5
PWP2	21q22.3	0.725937	0.00444001	0.00680298	5
RAB25	1q22	2.23017	2.48348e-52	7.75329e-51	5
RAB9B	Xq22.2	-1.28416	1.21419e-24	9.01512e-24	5
RAD21	8q24.11	0.66786	1.58498e-11	5.2068e-11	5
RARS	5q34	0.357118	5.60376e-15	2.33368e-14	5
RBM5	3p21.31	-0.351924	1.99914e-09	5.63328e-09	5
RBMXL1	1p22.2	-0.720209	6.96019e-30	6.81887e-29	5
RGS4	1q23.3	1.50117	1.24344e-18	6.54021e-18	5
RHPN2	19q13.12	0.446397	0.000692041	0.00116971	5
RNF145	5q33.3	-1.52013	2.08724e-46	4.76064e-45	5
RNF32	7q36.3	0.290355	0.00107132	0.00177012	5
RNF34	12q24.31	0.459472	1.05652e-21	6.65853e-21	5
RNF41	12q13.3	-0.249482	9.51876e-10	2.74474e-09	5
ROPN1B	3q21.2	-3.66061	4.99934e-47	1.17723e-45	5
RPL4	15q22.31	-0.587455	1.6155e-16	7.38277e-16	5
RPL5	1p22.1	-0.793238	2.20826e-26	1.8111e-25	5
RPP30	10q23.31	-0.143674	0.00172841	0.00278463	5
RPS6	9p22.1	-0.548282	1.10636e-11	3.6734e-11	5
RRP1	21q22.3	0.580011	1.10913e-11	3.68216e-11	5
SAFB	19p13.3	0.309043	2.33031e-09	6.53243e-09	5
SAMD14	17q21.33	1.86062	4.06736e-63	2.3337e-61	5
SCAF11	12q12	-0.297238	8.6168e-07	1.95019e-06	5
SCML2	Xp22.13	-0.380452	0.0151092	0.0214907	5
SCML4	6q21	-0.658679	0.00158526	0.00256719	5
SEC14L6	22q12.2	-1.24256	3.98443e-13	1.4695e-12	5
SEC61A1	3q21.3	0.462284	4.98231e-18	2.52112e-17	5
SECISBP2L	15q21.1	-0.752837	7.5684e-19	4.02918e-18	5
2019-09-12	16p13.3	1.67728	1.52793e-19	8.50675e-19	5
SERPINI2	3q26.1	-0.620771	8.3093e-05	0.000155345	5
SGCG	13q12.12	-3.35985	4.03196e-35	5.12783e-34	5
SH2D3A	19p13.3	0.557427	3.18104e-08	8.12649e-08	5
SHANK3	22q13.33	-1.37013	4.14626e-42	7.52324e-41	5
SHC4	15q21.1	-1.90159	4.41423e-17	2.0871e-16	5
SIGLEC16	19q13.33	-0.753573	2.69991e-08	6.94299e-08	5
SIM2	21q22.13	1.01316	7.37868e-07	1.68017e-06	5
SIRT3	11p15.5	-0.153159	0.0345098	0.0466064	5
SIRT7	17q25.3	0.811422	1.43131e-24	1.05788e-23	5
SIX4	14q23.1	1.60749	9.72745e-35	1.21695e-33	5
SLC16A6	17q24.2	2.21222	2.52057e-27	2.16573e-26	5
SLC17A7	19q13.33	-3.11815	1.38287e-73	1.49664e-71	5
SLC18A1	8p21.3	0.660272	0.00105006	0.00173717	5
SLC20A1	2q14.1	1.14038	7.16878e-68	5.4653e-66	5
SLC25A22	11p15.5	1.38948	9.29951e-54	3.12604e-52	5
SLC27A5	19q13.43	0.337414	0.00114914	0.00189157	5
SLC2A3	12p13.31	-0.774313	5.81889e-10	1.70767e-09	5
SLC30A9	4p13	0.176327	0.001377	0.00224521	5
SLC34A2	4p15.2	-3.37835	1.27121e-17	6.23583e-17	5
SLC35F6	2p23.3	0.58072	1.1188e-19	6.27192e-19	5
SLC5A3	21q22.11	-0.618025	8.0043e-09	2.1499e-08	5
SLC6A14	Xq23	-4.06719	1.4403e-30	1.45977e-29	5
SLC6A16	19q13.33	-1.3536	7.65622e-17	3.56739e-16	5
SLFN11	17q12	-0.872833	2.26534e-14	9.07124e-14	5
SLFN5	17q12	-0.995741	2.0041e-14	8.05082e-14	5
SMURF2	17q23.3-q24.1	-0.510936	1.10865e-12	3.94947e-12	5
SMYD3	1q44	1.44999	6.83287e-40	1.08813e-38	5
SND1	7q32.1	0.209832	6.84099e-05	0.000128881	5
SORBS3	8p21.3	-0.462331	7.92054e-07	1.79762e-06	5
SORT1	1p13.3	-0.312471	1.00552e-05	2.06246e-05	5
SOX9	17q24.3	-0.600535	0.000248738	0.000441941	5
SP140	2q37.1	0.880964	1.29935e-09	3.71024e-09	5
SPNS1	16p11.2	0.56828	1.94982e-10	5.93155e-10	5
SSBP2	5q14.1	-0.737636	2.01329e-13	7.56984e-13	5
STAM	10p12.33	0.112562	0.0297574	0.0405633	5
STARD3	17q11-q12	0.588727	2.68493e-07	6.35441e-07	5
STAT1	2q32.2	0.852038	2.45089e-12	8.52853e-12	5
STRA6	15q24.1	1.7082	2.44402e-28	2.22976e-27	5
STX17	9q31.1	-0.372226	8.13479e-07	1.84382e-06	5
STXBP2	19p13.2	1.61561	2.11517e-57	8.54676e-56	5
STXBP5L	3q13.33	0.783233	0.000737837	0.00124285	5
SULF2	20q13.12	0.845571	1.35874e-10	4.16836e-10	5
SV2B	15q26.1	-2.48711	7.20811e-38	1.04535e-36	5
SWI5	9q34.11	0.594054	2.90901e-16	1.30733e-15	5
TAF2	8q24.12	0.367918	4.79288e-05	9.18122e-05	5
TBC1D10C	11q13.2	0.479819	0.000707506	0.00119416	5
TBC1D9	4q31.21	0.97529	2.32209e-11	7.53854e-11	5
TCF7	5q31.1	-1.20451	6.4631e-18	3.23953e-17	5
TDRD3	13q21.2	-0.286375	1.83716e-07	4.40847e-07	5
TEAD4	12p13.33	0.716335	1.86675e-13	7.03804e-13	5
TF	3q22.1	-4.54315	2.98071e-57	1.19393e-55	5
TFDP2	3q23	-0.746581	1.03572e-34	1.29397e-33	5
TFPI	2q32.1	-2.20787	4.0278e-50	1.12282e-48	5
THBS2	6q27	0.939288	1.09426e-08	2.90658e-08	5
THOC1	18p11.32	0.144454	0.015528	0.0220568	5
TIE1	1p34.2	-1.17442	4.36734e-30	4.30926e-29	5
TIMELESS	12q13.3	1.32603	9.60456e-48	2.35824e-46	5
TLR10	4p14	-0.445073	0.0152952	0.0217395	5
TM7SF3	12p11.23	0.178857	0.0139628	0.0199475	5
TMC4	19q13.42	1.76103	6.46546e-40	1.03022e-38	5
TMCO6	5q31.3	-0.249506	2.93465e-05	5.75094e-05	5
TMEM246	9q31.1	-2.34941	1.08765e-69	9.32202e-68	5
TMPRSS6	22q12.3	2.00915	5.55309e-13	2.0253e-12	5
TMTC1	12p11.22	-2.77889	1.03428e-46	2.39464e-45	5
TMTC3	12q21.32	0.196157	0.0103809	0.0151152	5
TNFAIP6	2q23.3	0.782279	3.67997e-08	9.35345e-08	5
TNFRSF21	6p12.3	-1.33113	4.44141e-27	3.77151e-26	5
TNIP3	4q27	0.621747	0.000850649	0.00142263	5
TOX2	20q13.12	-0.744349	1.45231e-07	3.51557e-07	5
TPCN1	12q24.13	-0.460533	1.01312e-13	3.89361e-13	5
TRAM1L1	4q26	0.392425	0.00014724	0.000268309	5
TRIM50	7q11.23	-1.88874	8.56584e-34	1.02028e-32	5
TRMT1	19p13.13	0.208372	0.0103744	0.0151073	5
TROVE2	1q31.2	0.179733	0.0210799	0.0293715	5
TSEN54	17q25.1	1.15507	7.32928e-41	1.22739e-39	5
TSG101	11p15.1	0.318137	4.35002e-10	1.29046e-09	5
TTC23L	5p13.2	0.583877	2.39509e-05	4.7414e-05	5
TTC4	1p32.3	-0.187435	0.000356533	0.000622642	5
TTLL1	22q13.2	0.308851	1.97459e-06	4.32676e-06	5
TTLL2	6q27	-0.839168	3.04967e-07	7.18559e-07	5
UBAP1	9p13.3	-0.374108	1.46713e-19	8.17811e-19	5
UGT8	4q26	-2.88188	1.2395e-31	1.3352e-30	5
UMPS	3q21.2	0.235571	2.44268e-07	5.79998e-07	5
UNC45B	17q12	-0.956132	8.792e-12	2.94647e-11	5
USP19	3p21.31	-0.229562	3.37637e-06	7.24412e-06	5
VAV2	9q34.2	1.03972	6.33828e-49	1.65022e-47	5
VCP	9p13.3	0.352113	8.931e-11	2.78474e-10	5
VPS8	3q27.2	0.124443	0.0119829	0.0172845	5
VRK3	19q13.33	0.355194	4.09521e-12	1.40101e-11	5
VSIG4	Xq12	-0.99673	3.97561e-12	1.36229e-11	5
VWA5B1	1p36.12	-0.575937	0.00179405	0.002885	5
WDR24	16p13.3	0.988462	4.50599e-32	4.95123e-31	5
WDR26	1q42.11-q42.12	0.321431	1.1525e-08	3.05629e-08	5
WDR4	21q22.3	0.466803	1.55017e-11	5.09728e-11	5
WDR62	19q13.12	2.45153	1.24973e-75	1.60419e-73	5
WIPI1	17q24.2	0.263327	0.00173489	0.00279424	5
WISP1	8q24.22	3.458	3.62166e-86	1.06464e-83	5
WNK4	17q21.2	1.16689	2.58228e-05	5.09224e-05	5
WTAP	6q25.3	-0.282343	5.03159e-10	1.48499e-09	5
XKR6	8p23.1	-1.56562	1.00741e-17	4.96298e-17	5
XRRA1	11q13.4	0.414549	6.76624e-05	0.00012756	5
ZBTB10	8q21.13	-0.412091	0.0013974	0.00227713	5
ZBTB14	18p11.31	-0.249343	5.47139e-09	1.49091e-08	5
ZBTB16	11q23.2	-4.01244	2.64225e-46	5.98693e-45	5
ZBTB20	3q13.31	-1.27643	1.55802e-18	8.13746e-18	5
ZBTB24	6q21	0.143768	0.022288	0.0309533	5
ZBTB43	9q33.3	-0.171606	0.0044396	0.00680273	5
ZBTB7C	18q21.1	-0.411127	0.0299233	0.0407686	5
ZC3H14	14q31.3	-0.230323	2.42478e-05	4.79671e-05	5
ZC3H15	2q32.1	0.180058	1.92204e-05	3.83964e-05	5
ZCCHC12	Xq24	-1.45111	4.51263e-22	2.91184e-21	5
ZCCHC5	-	-1.1375	2.18236e-14	8.74402e-14	5
ZDHHC5	11q12.1	0.212168	1.60732e-05	3.23551e-05	5
ZFHX2	14q11.2	0.482174	5.83537e-07	1.34074e-06	5
ZFP3	17p13.2	-0.329186	7.26098e-06	1.50997e-05	5
ZFP37	9q32	-1.14419	1.97547e-18	1.02479e-17	5
ZFP62	5q35.3	0.386556	3.03667e-11	9.78586e-11	5
ZHX3	20q12	-0.88129	7.05682e-34	8.43091e-33	5
ZKSCAN2	16p12.1	0.266194	0.000176532	0.000318802	5
ZKSCAN4	6p22.1	0.202096	9.51423e-05	0.000176865	5
ZNF20	19p13.2	0.650703	9.97387e-17	4.62542e-16	5
ZNF239	10q11.22-q11.23	1.13723	4.38185e-31	4.56685e-30	5
ZNF252P	8q24.3	0.243951	0.00289403	0.00454733	5
ZNF275	Xq28	-0.16912	0.0214549	0.0298579	5
ZNF286A	17p12	-0.161098	0.0290244	0.0396287	5
ZNF350	19q13.41	0.232829	0.00270588	0.00426651	5
ZNF37BP	10q11.21	-0.683011	5.33199e-12	1.8091e-11	5
ZNF440	19p13.2	0.361374	5.28022e-07	1.21781e-06	5
ZNF555	19p13.3	-0.264426	7.26784e-05	0.000136578	5
ZNF577	19q13.41	-0.509271	5.91102e-06	1.24093e-05	5
ZNF589	3p21.31	-0.183917	0.00169359	0.00273076	5
ZNF616	19q13.41	-0.256016	4.21195e-05	8.10949e-05	5
ZNF623	8q24.3	0.593433	4.65038e-13	1.70576e-12	5
ZNF629	16p11.2	0.485315	1.51725e-15	6.52941e-15	5
ZNF649	19q13.41	-0.365542	0.00105358	0.00174268	5
ZNF701	19q13.41	0.281815	3.75206e-05	7.25898e-05	5
ZNF749	19q13.43	0.280769	0.000715615	0.00120726	5
ZNF770	15q14	-0.504637	0.000136388	0.000249488	5
ZNF835	19q13.43	-0.959519	1.40726e-08	3.70094e-08	5
ZXDB	Xp11.21	0.183127	0.0188591	0.0264846	5
AASS	7q31.32	-1.89719	3.63229e-45	7.74086e-44	4
ABCD2	12q12	-3.64001	2.15495e-62	1.17534e-60	4
ABHD12	20p11.21	1.0038	5.8296e-32	6.3717e-31	4
ACE2	Xp22.2	-3.12404	1.3511e-41	2.38259e-40	4
ACER3	11q13.5	-0.442444	2.61903e-05	5.16065e-05	4
ACSM3	16p12.3	-1.82242	2.59057e-41	4.47401e-40	4
ACTG2	2p13.1	-3.89331	4.30052e-56	1.62583e-54	4
ADAM10	15q21.3	-0.135121	0.032884	0.0445415	4
ADAM20	14q24.2	-0.394857	0.00651704	0.00976106	4
ADAMTS10	19p13.2	-0.392737	0.00180056	0.00289478	4
ADARB1	21q22.3	-0.649452	1.95808e-20	1.14684e-19	4
ADD3	10q25.1-q25.2	-1.68222	1.01721e-37	1.46289e-36	4
AEN	15q26.1	0.312274	2.59774e-06	5.63265e-06	4
AGBL4	1p33	0.302973	0.0365993	0.0492548	4
AGPAT4	6q26	-0.991474	2.61083e-18	1.34554e-17	4
AHCY	20q11.22	0.644742	1.45049e-16	6.65402e-16	4
AK5	1p31.1	-2.96152	1.93763e-31	2.06466e-30	4
AK7	14q32.2	-0.491778	0.000913918	0.00152327	4
ALDH16A1	19q13.33	0.574873	4.39122e-09	1.2055e-08	4
AMICA1	-	-0.578352	0.000327479	0.000574812	4
AMZ2	17q24.2	0.470891	1.82877e-10	5.57377e-10	4
ANGPTL5	11q22.1	-2.97928	1.87957e-52	5.90129e-51	4
ANKRD20A11P	21q11.2	-0.532388	0.0288521	0.0394208	4
ANKRD44	2q33.1	-0.269057	0.00689573	0.0102925	4
ANKRD52	12q13.3	0.235944	0.000271556	0.000480472	4
AOC1	7q36.1	1.09802	1.04502e-05	2.14014e-05	4
AP5B1	11q13.1	-0.198854	0.00188153	0.00301916	4
APBB1	11p15.4	-0.722066	9.61059e-12	3.20989e-11	4
APEX1	14q11.2	0.241029	8.02437e-06	1.66171e-05	4
APEX2	Xp11.21	0.683745	2.40465e-28	2.19528e-27	4
APLNR	11q12.1	-0.610193	3.50885e-07	8.22481e-07	4
APOL4	22q12.3	-0.901537	3.89414e-09	1.07277e-08	4
APTX	9p21.1	0.447713	1.87484e-17	9.08547e-17	4
ARFGAP1	20q13.33	1.00128	6.8514e-34	8.19259e-33	4
ARGLU1	13q33.3	-0.64538	3.02053e-17	1.44223e-16	4
ARHGAP1	11p11.2	0.237366	2.36541e-06	5.1471e-06	4
ARHGEF18	19p13.2	0.455828	2.22876e-09	6.25793e-09	4
ARHGEF33	2p22.1	-0.774097	2.63233e-12	9.14258e-12	4
ARPC1B	7q22.1	0.969023	1.10006e-24	8.18979e-24	4
ATF2	2q31.1	-0.18272	0.000284583	0.000502362	4
ATP13A2	1p36.13	0.85559	9.08859e-23	6.09247e-22	4
ATP6V1C1	8q22.3	0.330395	4.26765e-05	8.21387e-05	4
ATP9B	18q23	-0.27686	4.48755e-06	9.53121e-06	4
B4GALT5	20q13.13	-0.433707	1.29533e-07	3.14659e-07	4
BARX2	11q24.3	-0.716841	0.00420632	0.00646538	4
BBS12	4q27	-0.609441	9.68517e-17	4.49304e-16	4
BEND5	1p33	-1.2568	1.48168e-23	1.04448e-22	4
BIVM	13q33.1	-0.741987	3.96343e-14	1.56351e-13	4
BLOC1S1	12q13.2	0.329457	0.000115126	0.000212071	4
BLVRA	7p13	0.629689	8.93488e-10	2.58177e-09	4
BMP3	4q21.21	-4.00603	6.02465e-58	2.51922e-56	4
BPIFB1	20q11.21	2.42683	4.35555e-14	1.71378e-13	4
BRD2	6p21.32	0.106358	0.0276836	0.0379162	4
BRIX1	5p13.2	0.452118	2.4631e-14	9.83316e-14	4
BROX	1q41	0.602345	6.9772e-19	3.72617e-18	4
BST1	4p15.32	-1.08365	6.10803e-26	4.88324e-25	4
BTBD11	12q23.3	-1.65321	5.04234e-24	3.63813e-23	4
BTN2A1	6p22.2	-0.334588	2.52766e-11	8.18952e-11	4
C11orf24	11q13.2	0.616243	6.1568e-19	3.29741e-18	4
C12orf5	-	0.247139	0.000391211	0.000680103	4
C14orf80	-	1.19398	2.86027e-22	1.86394e-21	4
C16orf91	16p13.3	0.85408	1.60507e-23	1.12887e-22	4
C17orf47	17q22	0.379729	0.00692115	0.0103271	4
C1GALT1C1	Xq24	0.243847	1.84761e-05	3.69602e-05	4
C1orf116	1q32.1	-0.630316	0.0219243	0.0304836	4
C1orf123	1p32.3	-0.391032	4.25795e-13	1.5666e-12	4
C1orf198	1q42.2	-0.36793	1.27273e-06	2.8386e-06	4
C1QTNF2	5q33.3	-0.991869	1.56765e-10	4.78743e-10	4
C1QTNF3	5p13.2	0.95272	1.55633e-09	4.41798e-09	4
C1QTNF6	22q12.3	2.08615	1.29975e-67	9.6947e-66	4
C1S	12p13.31	-1.04007	1.08445e-11	3.60326e-11	4
C2	6p21.33	0.573348	2.50077e-05	4.93856e-05	4
C2orf42	2p13.3	-0.0818457	0.0196429	0.0275124	4
C5orf34	5p12	0.56969	2.29736e-13	8.61213e-13	4
C6orf165	-	-0.324507	0.0123542	0.0177829	4
C9orf91	-	0.645623	2.28928e-20	1.33515e-19	4
CABYR	18q11.2	0.86788	2.16626e-12	7.56477e-12	4
CALCR	7q21.3	-1.8319	7.86801e-21	4.72149e-20	4
CALN1	7q11.22	-2.33271	2.16407e-27	1.86754e-26	4
CAMK2G	10q22.2	-0.319812	2.03247e-10	6.17551e-10	4
CAMK4	5q22.1	0.463373	0.000999386	0.00165761	4
CAMKK2	12q24.31	-0.169117	7.93292e-05	0.000148675	4
CAPRIN2	12p11.21	-0.380904	3.19082e-08	8.14919e-08	4
CASS4	20q13.31	-0.290753	0.0187964	0.0264045	4
CATSPER1	11q13.1	1.59969	7.62528e-32	8.3146e-31	4
CCDC142	2p13.1	0.479651	1.54119e-14	6.23389e-14	4
CCDC159	19p13.2	0.640114	1.52595e-12	5.38807e-12	4
CCDC174	3p25.1	-0.131452	0.00198206	0.00317124	4
CCDC34	11p14.1	0.285231	0.00114108	0.00187896	4
CCDC8	19q13.32	-2.08177	1.13363e-34	1.41437e-33	4
CCDC97	19q13.2	0.224404	1.19757e-06	2.67788e-06	4
CCL13	17q12	-2.52267	2.15871e-25	1.68057e-24	4
CCNA2	4q27	2.36516	4.55868e-61	2.30422e-59	4
CCNB1	5q13.2	2.16095	3.10636e-69	2.60575e-67	4
CCT2	12q15	0.563467	4.0732e-13	1.50063e-12	4
CD180	5q12.3	-0.320344	0.0064975	0.00973285	4
CD1C	1q23.1	-1.1369	1.99389e-07	4.77172e-07	4
CD1D	1q23.1	-0.26901	0.0175815	0.0248077	4
CD300LF	17q25.1	0.986005	4.2176e-17	1.99721e-16	4
CD79B	17q23.3	-0.92688	5.52879e-07	1.27312e-06	4
CD84	1q23.3	0.443813	0.00138335	0.00225504	4
CD99L2	Xq28	-0.817427	5.116e-24	3.69031e-23	4
CDC123	10p14-p13	0.359026	2.78218e-11	8.98987e-11	4
CDC16	13q34	-0.182579	0.000357419	0.00062403	4
CDCA4	14q32.33	0.941544	4.53545e-34	5.47787e-33	4
CDCA7L	7p15.3	-0.908011	4.11574e-10	1.22333e-09	4
CDH22	20q13.12	-2.19468	2.67346e-20	1.55265e-19	4
CDKN2D	19p13.2	1.02026	9.10202e-24	6.48084e-23	4
CDYL2	16q23.2	0.822033	8.74277e-13	3.13599e-12	4
CELA2B	1p36.21	-0.42864	0.00117492	0.00193222	4
CENPO	2p23.3	0.898916	3.83734e-31	4.02213e-30	4
CEP112	17q24.1	-1.83084	3.96614e-64	2.41096e-62	4
CEP135	4q12	0.238725	0.000687298	0.00116212	4
CEP19	3q29	0.248663	0.000727925	0.00122675	4
CERKL	2q31.3	0.731227	3.39831e-12	1.17087e-11	4
CES1	16q12.2	-3.90122	3.47206e-62	1.86062e-60	4
CETP	16q13	-0.925336	4.14219e-12	1.41638e-11	4
CFHR3	1q31.3	-0.62752	0.000727616	0.00122631	4
CHN2	7p14.3	0.37373	0.00573607	0.00865807	4
CHPF	2q35	1.25627	9.49548e-37	1.29667e-35	4
CHPT1	12q23.2	-0.623332	3.52716e-07	8.26547e-07	4
CHRNA6	8p11.21	3.76004	2.45547e-66	1.6984e-64	4
CIRH1A	-	-0.458083	3.23901e-13	1.20213e-12	4
CLCN2	3q27.1	1.12506	7.21291e-48	1.78531e-46	4
CLDN8	21q22.11	-2.87563	3.41281e-22	2.2146e-21	4
CLIC5	6p21.1	-2.24568	4.29922e-50	1.19728e-48	4
CLIP4	2p23.2	-2.341	2.67131e-48	6.73267e-47	4
CLK3	15q24.1	-0.116078	0.0183798	0.0258667	4
CLPTM1L	5p15.33	0.459547	2.51363e-16	1.13315e-15	4
CLYBL	13q32.3	-0.976052	1.10102e-24	8.19472e-24	4
CMIP	16q23.2-q23.3	-0.185111	0.0047026	0.00717941	4
CMKLR1	12q23.3	-0.386143	0.0011811	0.00194163	4
CMTM5	14q11.2	-3.7031	1.69117e-71	1.58751e-69	4
CNDP2	18q22.3	0.470736	6.5773e-13	2.38372e-12	4
CNPPD1	2q35	0.272029	1.03776e-06	2.33093e-06	4
COL4A3BP	5q13.3	-0.758575	8.18323e-31	8.43633e-30	4
COQ6	14q24.3	0.170429	0.00500158	0.00760684	4
CORO2A	9q22.33	1.43848	4.26254e-37	5.91441e-36	4
CS	12q13.3	-0.28051	1.28419e-06	2.86277e-06	4
CSF2RB	22q12.3	-0.426952	0.0010081	0.00167137	4
CSGALNACT1	8p21.3	-1.16476	2.15984e-26	1.7735e-25	4
CTGF	6q23.2	-0.674794	1.29291e-05	2.62578e-05	4
CTH	1p31.1	-0.456629	1.21995e-06	2.72547e-06	4
CTIF	18q21.1	-1.04355	8.68699e-32	9.44988e-31	4
CXorf23	-	-0.224284	0.000182152	0.000328586	4
CYB5R2	11p15.4	-0.494032	0.000216928	0.00038767	4
CYP2C8	10q23.33	-0.57623	0.0107646	0.0156252	4
CYYR1	21q21.3	-2.2903	1.40535e-85	3.80242e-83	4
DACT2	6q27	-4.46209	5.89409e-70	5.18042e-68	4
DCAF10	9p13.2	0.910692	3.65239e-16	1.63184e-15	4
DCBLD1	6q22.1	0.324427	6.78625e-05	0.000127911	4
DCBLD2	3q12.1	-0.981007	2.59734e-27	2.2289e-26	4
DCSTAMP	8q22.3	1.448	1.25057e-13	4.7736e-13	4
DCT	13q32.1	-3.99621	1.8153e-67	1.34674e-65	4
DCUN1D3	16p12.3	-0.975142	2.4059e-49	6.43391e-48	4
DDC	7p12.2-p12.1	-1.17926	1.21438e-06	2.7135e-06	4
DDX49	19p13.11	0.592419	5.41387e-16	2.3925e-15	4
DDX60	4q32.3	0.456957	0.000715083	0.00120651	4
DEPDC7	11p13	0.586932	1.78858e-06	3.93881e-06	4
DFNB31	-	0.571518	2.87368e-08	7.37403e-08	4
DHX16	6p21.33	0.127828	0.00580878	0.00875919	4
DIO2	14q31.1	0.55476	0.00297528	0.00466889	4
DKK4	8p11.21	-2.41218	5.98764e-38	8.73398e-37	4
DLG3	Xq13.1	1.11253	9.82335e-57	3.82376e-55	4
DLGAP3	1p34.3	0.406101	0.0216306	0.0300917	4
DNAJC10	2q32.1	0.361795	9.28029e-08	2.28309e-07	4
DNAJC2	7q22.1	0.310048	1.18111e-10	3.64448e-10	4
DNPEP	2q35	0.438833	1.03081e-12	3.67978e-12	4
DOK3	5q35.3	0.886719	7.04494e-22	4.49437e-21	4
DOK5	20q13.2	-1.37074	8.18896e-26	6.49049e-25	4
DPY19L2P1	7p14.2	1.48899	1.69344e-08	4.42823e-08	4
DSG2	18q12.1	-0.597884	4.4513e-08	1.12415e-07	4
DTX4	11q12.1	-1.0277	1.70965e-13	6.46074e-13	4
DUOXA2	15q21.1	-1.48126	5.20758e-18	2.63221e-17	4
DUS3L	19p13.3	0.216788	0.00710412	0.0105864	4
DYNC1LI2	16q22.1	-0.809648	9.05431e-19	4.80171e-18	4
EBF3	10q26.3	-2.62115	8.37373e-71	7.65226e-69	4
EBF4	20p13	0.438883	0.00204047	0.00326036	4
ECT2	3q26.31	1.56983	7.07844e-50	1.95156e-48	4
EDA	Xq13.1	-1.60349	9.87094e-44	1.95002e-42	4
EFCC1	3q21.3	0.401345	0.0280852	0.0384377	4
EFNA3	1q21.3	1.3337	7.11267e-17	3.32254e-16	4
EFTUD1	-	0.204499	3.04577e-05	5.95854e-05	4
EHD4	15q15.1	-0.1731	0.000951174	0.00158231	4
EHHADH	3q27.2	-1.08973	1.28582e-24	9.53667e-24	4
EIF2B3	1p34.1	-0.336873	5.50779e-11	1.74237e-10	4
EIF3B	7p22.3	0.214452	0.000357851	0.000624746	4
EIF3D	22q12.3	-0.488271	3.37174e-16	1.50938e-15	4
ELK3	12q23.1	-0.63658	7.61476e-19	4.05152e-18	4
ELOVL4	6q14.1	-0.548609	0.000206176	0.000369604	4
EPB41L4B	9q31.3	-1.12995	1.07603e-20	6.40284e-20	4
EPHA8	1p36.12	2.3497	8.10275e-16	3.54558e-15	4
EPOR	19p13.2	0.203187	0.0249571	0.0344124	4
EPT1	-	0.845703	3.77564e-25	2.89364e-24	4
ERAP1	5q15	-0.700967	1.647e-16	7.52298e-16	4
ERP29	12q24.13	0.375026	3.03543e-07	7.15325e-07	4
ETNK2	1q32.1	1.40582	5.83266e-20	3.32651e-19	4
EXOC6B	2p13.2	-0.568797	4.25502e-21	2.59571e-20	4
EZH1	17q21.2	-1.19508	1.18575e-67	8.91674e-66	4
F11R	1q23.3	0.761209	1.21633e-28	1.12683e-27	4
FAH	15q25.1	-0.268422	0.0106593	0.0154829	4
FAHD2A	2q11.1	-0.758309	2.19526e-34	2.70709e-33	4
FAIM3	-	0.883036	2.33481e-09	6.54374e-09	4
FAM114A1	4p14	0.343699	9.17992e-08	2.25941e-07	4
FAM149A	4q35.1	-2.08855	3.9329e-51	1.15962e-49	4
FAM153C	5q35.3	0.753469	1.94011e-06	4.25487e-06	4
FAM160B2	8p21.3	-0.240056	0.00217257	0.00346181	4
FAM161A	2p15	-0.206141	0.0294087	0.0401157	4
FAM20A	17q24.2	-1.14228	8.82449e-19	4.68163e-18	4
FAM21C	-	-0.372726	3.25666e-11	1.04715e-10	4
FAM58A	-	0.363543	2.16717e-07	5.16891e-07	4
FARS2	6p25.1	0.137537	0.00797355	0.0117992	4
FASTK	7q36.1	0.583578	1.16163e-12	4.13308e-12	4
FBXL19	16p11.2	1.15944	1.77219e-43	3.45645e-42	4
FBXO28	1q42.11	0.295146	9.09335e-06	1.87436e-05	4
FBXO43	8q22.2	2.01248	3.09231e-50	8.69944e-49	4
FBXW8	12q24.22	0.141864	0.0150706	0.0214401	4
FBXW9	19p13.13	0.777261	4.44685e-19	2.40353e-18	4
FCAMR	1q32.1	0.61573	0.002983	0.0046794	4
FCER1A	1q23.2	-1.76447	3.19827e-17	1.52551e-16	4
FDFT1	8p23.1	-0.316003	4.75415e-05	9.11209e-05	4
FGFR3	4p16.3	1.8751	2.10333e-17	1.01553e-16	4
FGGY	1p32.1	-0.26971	0.000209925	0.000375934	4
FGL2	7q11.23	-1.38281	1.49312e-22	9.88177e-22	4
FHL5	6q16.1	-2.59105	1.08971e-50	3.14581e-49	4
FKBP10	17q21.2	1.16601	2.22515e-30	2.22903e-29	4
FLRT3	20p12.1	-0.691869	0.00434538	0.00666688	4
FOXP2	7q31.1	-2.36665	3.45489e-42	6.29776e-41	4
FPGS	9q34.11	0.250793	0.00061562	0.0010463	4
FRRS1	1p21.2	-0.352072	0.00762167	0.0113015	4
FZD10	12q24.33	-0.506944	0.00308159	0.0048253	4
FZD9	7q11.23	-1.9305	9.65438e-24	6.86175e-23	4
GAB1	4q31.21	-0.46715	1.22401e-08	3.23845e-08	4
GALK2	15q21.1-q21.2	-0.244089	0.000135573	0.000248096	4
GATAD2A	19p13.11	0.400504	5.36103e-18	2.70779e-17	4
GEMIN2	14q21.1	0.222812	5.57829e-05	0.000106158	4
GEMIN4	17p13.3	-0.473256	1.23633e-14	5.0347e-14	4
GHR	5p13.1-p12	-2.79958	5.35923e-60	2.52396e-58	4
GIPC3	19p13.3	-0.380675	3.3064e-05	6.43739e-05	4
GK	Xp21.2	0.941823	1.09857e-23	7.78592e-23	4
GLRA4	Xq22.2	-3.38365	1.90748e-68	1.51272e-66	4
GLUD2	Xq24	-0.321864	0.00984845	0.0143854	4
GNPTG	16p13.3	0.395669	1.71036e-07	4.11423e-07	4
GPD1	12q13.12	-5.49536	9.27213e-61	4.58588e-59	4
GPR12	13q12.13	-4.2979	1.50424e-57	6.123e-56	4
GPR143	Xp22.2	1.6731	1.05135e-21	6.62902e-21	4
GPR17	2q14.3	-2.98597	4.16685e-53	1.34342e-51	4
GPRIN1	5q35.2	2.41888	1.6189e-67	1.20427e-65	4
GPT2	16q11.2	-0.961738	1.48275e-13	5.62564e-13	4
GRAMD1C	3q13.31	-0.667874	1.43948e-09	4.09792e-09	4
GRB10	7p12.1	-0.500984	4.97553e-09	1.36157e-08	4
GRINA	8q24.3	0.694559	6.96022e-14	2.70166e-13	4
GRM7	3p26.1	-1.82352	7.80027e-17	3.63206e-16	4
GTF3C3	2q33.1	-0.177746	0.000389722	0.000677728	4
GTF3C4	9q34.13	0.153855	0.0195819	0.0274327	4
GYLTL1B	-	0.51428	0.00346443	0.00538838	4
H2AFZ	4q23	1.21388	1.44995e-47	3.52252e-46	4
HAND2	4q34.1	-1.47438	2.88847e-23	2.00342e-22	4
HAP1	17q21.2	-2.11144	1.33601e-23	9.42757e-23	4
HARS	5q31.3	0.1517	0.00127076	0.00208158	4
HAS1	19q13.41	-1.40554	1.00288e-08	2.67183e-08	4
HDAC11	3p25.1	1.05251	4.48794e-23	3.0658e-22	4
HDAC8	Xq13.1	0.330085	1.96492e-12	6.88695e-12	4
HDDC2	6q22.31	-0.226399	0.000495867	0.000852698	4
HDHD1	-	0.169297	0.0120733	0.0174076	4
HEYL	1p34.2	0.949179	3.82966e-18	1.9493e-17	4
HIST1H1E	6p22.2	1.65272	1.03131e-15	4.48151e-15	4
HIST1H2AI	6p22.1	3.76348	3.43656e-43	6.61382e-42	4
HLA-DQB2	6p21.32	0.647618	0.000901198	0.00150325	4
HLA-V	6p22.1	-0.67995	0.000291818	0.000514738	4
HLTF	3q24	0.394304	2.94294e-06	6.35219e-06	4
HMGB3	Xq28	1.86031	1.16518e-38	1.75623e-37	4
HMGCLL1	6p12.1	-2.25036	8.40686e-17	3.91054e-16	4
HMGCS2	1p12	-2.06564	6.95421e-06	1.44847e-05	4
HNRNPC	14q11.2	0.461388	9.67206e-34	1.14957e-32	4
HNRNPM	19p13.2	0.354085	4.55597e-15	1.90798e-14	4
HOXA11	7p15.2	0.49996	0.00378543	0.00585563	4
HP1BP3	1p36.12	-0.35349	2.79033e-09	7.77775e-09	4
HPD	12q24.31	-2.13568	2.65764e-42	4.88319e-41	4
HPS6	10q24.32	0.287983	1.54061e-06	3.41481e-06	4
HRH2	5q35.2	-0.363726	0.0226722	0.0314425	4
HSD17B10	Xp11.22	0.711122	1.97738e-18	1.02559e-17	4
HSD17B2	16q23.3	-2.74993	7.70086e-21	4.6232e-20	4
HSF1	8q24.3	0.478789	9.28368e-09	2.48122e-08	4
HTR1D	1p36.12	2.73739	1.73934e-38	2.59752e-37	4
HTR1F	3p12	-0.775325	5.58287e-07	1.28493e-06	4
ICOS	2q33.2	0.993678	4.77345e-06	1.0115e-05	4
IFIT2	10q23.31	0.435971	0.00237859	0.00377526	4
IFT52	20q13.12	0.110575	0.0306373	0.0416784	4
IGHG4	14q32.33	2.85354	1.71715e-21	1.06902e-20	4
IGKV1D-16	2p11.2	-1.67295	3.03239e-09	8.42863e-09	4
IGSF5	21q22.2	0.624344	0.00506094	0.00769244	4
IK	5q31.3	0.122484	0.00631759	0.00947673	4
IL12RB2	1p31.3	-0.867699	1.09925e-05	2.24587e-05	4
IL17RC	3p25.3	0.224806	0.005323	0.00806945	4
IL22RA1	1p36.11	-1.84684	2.13787e-22	1.40478e-21	4
IL31RA	5q11.2	0.497495	0.00182759	0.00293653	4
IL6	7p15.3	-3.1838	2.70811e-34	3.31287e-33	4
IL7R	5p13.2	-0.67243	0.00134238	0.00219265	4
IMMT	2p11.2	0.256554	1.01277e-08	2.69766e-08	4
INVS	9q31.1	-0.420809	3.08841e-11	9.94679e-11	4
IQCC	1p35.2	0.6876	7.55794e-22	4.81163e-21	4
IRF9	14q12	0.933296	5.06287e-15	2.11673e-14	4
ISG20L2	1q23.1	0.771128	1.20914e-47	2.95048e-46	4
ISL1	5q11.1	-0.778037	9.10818e-05	0.000169671	4
ISLR	15q24.1	-0.365202	0.00937639	0.01373	4
ITGA6	2q31.1	-1.53338	3.47774e-36	4.62548e-35	4
ITGBL1	13q33.1	0.44998	0.00570227	0.0086094	4
ITM2A	Xq21.1	-2.75204	1.79055e-62	9.8831e-61	4
IYD	6q25.1	1.39887	1.2812e-05	2.60354e-05	4
JRK	8q24.3	-0.522896	4.05524e-08	1.0277e-07	4
KCNA3	1p13.3	-0.769449	6.73293e-05	0.000126958	4
KCNIP4	4p15.31-p15.2	-0.740083	4.79657e-16	2.12891e-15	4
KCNJ10	1q23.2	1.64025	1.6073e-21	1.0029e-20	4
KCNK5	6p21.2	-0.675248	0.000159325	0.000289128	4
KCNMB2	3q26.32	-2.18676	5.51492e-35	6.9689e-34	4
KCTD20	6p21.31	-0.310829	3.37889e-08	8.61121e-08	4
KCTD21	11q14.1	0.464821	9.61469e-07	2.16715e-06	4
KDM1A	1p36.12	0.229835	1.94731e-07	4.66389e-07	4
KIAA1522	1p35.1	0.855415	3.81478e-27	3.24839e-26	4
KIF20A	5q31.2	3.12288	2.81255e-82	5.79259e-80	4
KIF3A	5q31.1	0.415347	4.38502e-08	1.10802e-07	4
KITLG	12q21.32	0.316709	0.0297456	0.0405513	4
KLHL15	Xp22.11	-0.624868	1.09974e-14	4.49638e-14	4
KLHL30	2q37.3	-2.51325	8.34504e-45	1.73685e-43	4
KLHL36	16q24.1	-1.00161	7.93995e-45	1.65621e-43	4
KLK11	19q13.41	-2.8018	3.50472e-10	1.04735e-09	4
KLK1	19q13.33	-1.18649	2.86978e-08	7.36472e-08	4
KLK13	19q13.41	-2.09846	8.83469e-12	2.96006e-11	4
KLK3	19q13.33	-2.44028	1.17932e-14	4.80824e-14	4
KPNA7	7q22.1	1.26434	2.16391e-10	6.56402e-10	4
KRT13	17q21.2	-1.47573	3.78809e-05	7.32715e-05	4
KRT222	17q21.2	-1.02552	1.38066e-06	3.07062e-06	4
KRT36	17q21.2	0.716441	9.649e-08	2.37021e-07	4
KYNU	2q22.2	-0.559652	0.00248413	0.00393464	4
LAP3	4p15.32	0.167572	0.0167252	0.0236697	4
LDLRAD1	1p32.3	1.46695	1.46295e-10	4.48057e-10	4
LIPT1	2q11.2	-0.518201	4.41038e-24	3.19218e-23	4
LMNA	1q22	-0.264534	0.00313903	0.00490995	4
LONRF3	Xq24	-2.04815	9.50975e-38	1.3705e-36	4
LPAR1	9q31.3	-0.954437	7.79152e-18	3.87163e-17	4
LPCAT1	5p15.33	1.01247	4.85136e-31	5.04285e-30	4
LPHN1	-	0.257803	0.00271258	0.00427684	4
LPIN1	2p25.1	-1.53232	8.56681e-62	4.48474e-60	4
LRG1	19p13.3	1.53079	2.45828e-08	6.34884e-08	4
LRRC42	1p32.3	0.393841	5.74495e-10	1.68759e-09	4
LRRTM2	5q31.2	-2.80527	8.58013e-62	4.48474e-60	4
LRTM2	12p13.33	2.83031	8.50956e-20	4.80161e-19	4
LTBP3	11q13.1	-0.223604	0.0117824	0.0170104	4
LUZP2	11p14.3	-2.54924	8.63373e-25	6.46604e-24	4
LYSMD4	15q26.3	-1.2649	1.18981e-44	2.445e-43	4
MAB21L3	1p13.1	-0.503858	0.00948967	0.0138907	4
MAP3K6	1p36.11	-0.6024	3.42888e-11	1.10112e-10	4
MAP4K2	11q13.1	0.205808	0.00138509	0.00225774	4
MAP6	11q13.5	-1.04981	2.38697e-12	8.31237e-12	4
MAPK10	4q21.3	-2.01063	5.89347e-27	4.96635e-26	4
MAPKAPK3	3p21.2	0.351143	9.43201e-09	2.51916e-08	4
MB21D2	3q29	-0.512402	2.85758e-06	6.17471e-06	4
MBIP	14q13.3	-0.752374	7.00627e-26	5.57874e-25	4
MCCC1	3q27.1	-0.906838	2.69407e-35	3.45497e-34	4
MCCC2	5q13.2	0.813706	7.05759e-15	2.91973e-14	4
MDH1B	2q33.3	0.457	0.000573699	0.000978974	4
MDM4	1q32.1	0.304446	5.09902e-05	9.744e-05	4
MEAF6	1p34.3	0.534286	1.48469e-18	7.76622e-18	4
MECP2	Xq28	-0.384851	2.28209e-14	9.13433e-14	4
MED22	9q34.2	0.171702	0.00208109	0.00332161	4
METAP1	4q23	-0.351322	2.02667e-10	6.15856e-10	4
METTL16	17p13.3	-0.335229	4.27779e-10	1.26999e-09	4
METTL21B	-	-0.540017	1.05383e-19	5.91732e-19	4
METTL7B	12q13.2	-0.519946	0.00673885	0.0100731	4
MFAP1	15q15.3	0.176199	0.000696894	0.0011774	4
MFAP3L	4q33	-0.832631	7.10198e-08	1.76673e-07	4
MFSD8	4q28.2	-0.20197	0.000131905	0.00024164	4
MFSD9	2q12.1	-0.294786	6.15612e-07	1.41122e-06	4
MKNK1	1p33	-0.334589	1.29274e-11	4.27372e-11	4
MLXIPL	7q11.23	-3.1987	6.34893e-47	1.48364e-45	4
MMP13	11q22.2	6.21017	6.0767e-79	9.75028e-77	4
MOXD1	6q23.2	0.557151	0.000248377	0.000441329	4
MPP3	17q21.31	0.432538	2.7166e-05	5.34565e-05	4
MS4A14	11q12.2	0.752918	0.000184433	0.000332353	4
MSANTD4	11q22.3	-0.683686	3.85192e-15	1.62174e-14	4
MSLNL	16p13.3	1.68403	4.70565e-12	1.6023e-11	4
MSTO1	1q22	0.257278	4.85204e-05	9.28811e-05	4
MT-CYB	mitochondria	-0.807461	6.25697e-13	2.2721e-12	4
MTG2	20q13.33	0.640099	1.2095e-20	7.17536e-20	4
MTX1	1q22	0.80896	6.35005e-35	8.00954e-34	4
MUC3A	7q22.1	-1.78793	2.00139e-29	1.92253e-28	4
MUS81	11q13	0.237832	0.000121099	0.000222569	4
MVP	16p11.2	0.723961	8.76437e-16	3.83084e-15	4
MYBPH	1q32.1	0.475465	0.0106476	0.0154667	4
MYO15B	17q25.1	-0.746269	2.91672e-08	7.47963e-08	4
NAIF1	9q34.11	0.237644	5.58383e-06	1.17591e-05	4
NARF	17q25.3	0.193738	0.00494252	0.00752364	4
NAT10	11p13	0.484284	2.4162e-18	1.24733e-17	4
NBN	8q21.3	0.286878	0.000160047	0.000290324	4
NBR1	17q21.31	-0.326842	1.89115e-07	4.5337e-07	4
NCAPG2	7q36.3	0.810493	1.70874e-21	1.06403e-20	4
NCF4	22q12.3	-0.239718	0.0284652	0.0389326	4
NDC80	18p11.32	2.66181	1.45205e-76	1.97407e-74	4
NDRG2	14q11.2	-2.83569	3.07943e-99	2.83287e-96	4
NDUFAF1	15q15.1	0.144337	0.0148511	0.0211421	4
NEK3	13q14.3	-0.451039	4.28472e-09	1.1772e-08	4
NELFA	4p16.3	0.349326	4.99434e-09	1.36645e-08	4
NEMF	14q21.3	-0.153946	0.0296454	0.0404226	4
NIPA1	15q11.2	0.463467	6.64884e-09	1.79897e-08	4
NIPAL4	5q33.3	0.686513	0.000432273	0.000747626	4
NKRF	Xq24	0.165505	0.00160436	0.00259659	4
NOA1	4q12	-0.14275	0.00165956	0.00268011	4
NOL11	17q24.2	0.384486	7.36248e-08	1.82872e-07	4
NPAS1	19q13.32	1.2446	3.28137e-16	1.47155e-15	4
NR1H3	11p11.2	-0.806182	1.28492e-20	7.61132e-20	4
NR2C2	3p25.1	-0.586437	4.12688e-11	1.3173e-10	4
NRF1	7q32.2	-0.0814357	0.00417547	0.00642011	4
NSL1	1q32.3	0.347703	4.14395e-11	1.32244e-10	4
NT5C2	10q24.32-q24.33	-0.743952	6.51695e-13	2.36278e-12	4
NUDC	1p36.11	0.424927	1.41799e-08	3.7281e-08	4
NUP43	6q25.1	0.284575	4.53833e-07	1.05207e-06	4
NUP93	16q13	0.194357	0.00193684	0.00310321	4
NYAP1	7q22.1	-2.31333	5.72661e-40	9.14072e-39	4
OBFC1	-	-0.159747	0.00242904	0.00385135	4
ODF2L	1p22.3	-0.355517	6.87437e-06	1.43249e-05	4
OLFML2A	9q33.3	-1.19267	1.63626e-38	2.44555e-37	4
OR2A7	7q35	-0.784302	1.9267e-06	4.22781e-06	4
OR7A5	19p13.1	-2.18725	3.94509e-36	5.22692e-35	4
OSBP2	22q12.2	0.636564	9.69994e-10	2.7961e-09	4
OSBPL6	2q31.2	0.434888	0.00505612	0.00768554	4
OSR2	8q22.2	-0.683384	0.000155018	0.000281681	4
OXER1	2p21	-1.34187	2.01272e-22	1.32349e-21	4
P4HA1	10q22.1	0.721492	6.34592e-16	2.79233e-15	4
P4HA2	5q31.1	0.531361	2.06987e-11	6.74509e-11	4
P4HA3	11q13.4	2.66287	6.01491e-67	4.34554e-65	4
PACSIN2	22q13.2	-0.301132	1.04399e-05	2.13819e-05	4
PADI1	1p36.13	0.382683	0.0258337	0.0355342	4
PAG1	8q21.13	0.281236	0.0073311	0.0108999	4
PAICS	4q12	0.777113	3.7064e-27	3.15805e-26	4
PAK1	11q13.5-q14.1	0.588112	4.0936e-07	9.52333e-07	4
PAK2	3q29	0.258548	5.92083e-06	1.2428e-05	4
PARD3B	2q33.3	-1.06709	1.76013e-35	2.27309e-34	4
PARP10	8q24.3	1.00603	2.45712e-16	1.10858e-15	4
PARVA	11p15.3	-0.910992	9.51028e-40	1.51015e-38	4
PARVG	22q13.31	0.551335	6.17414e-07	1.41523e-06	4
PAX2	10q24.31	2.16168	9.51281e-13	3.40467e-12	4
PBDC1	Xq13.3	0.266578	4.83966e-05	9.2657e-05	4
PCDHB15	5q31.3	-1.37928	6.88212e-35	8.66877e-34	4
PCDHGA10	5q31.3	-0.678676	0.000136175	0.000249116	4
PCYT1A	3q29	-0.168762	0.000408396	0.00070855	4
PDK4	7q21.3	-3.64896	3.26592e-66	2.24211e-64	4
PELI2	14q22.3	-2.03792	3.28555e-53	1.06551e-51	4
PES1	22q12.2	0.29709	9.17828e-05	0.000170896	4
PEX11B	1q21.1	0.722141	9.51222e-34	1.13106e-32	4
PFKFB3	10p15.1	-1.59654	6.80014e-33	7.73579e-32	4
PI4K2B	4p15.2	0.34878	3.79805e-07	8.88142e-07	4
PIAS3	1q21.1	0.445241	1.29337e-09	3.69469e-09	4
PIGZ	3q29	-0.584352	1.22946e-09	3.51869e-09	4
PIH1D1	19q13.33	0.447083	9.7654e-10	2.81409e-09	4
PIM2	Xp11.23	0.602056	1.69816e-09	4.80774e-09	4
PIP4K2A	10p12.2	0.171055	0.0111151	0.0161086	4
PIWIL4	11q21	-1.61399	1.85032e-45	4.02404e-44	4
PKD2L2	5q31.2	-0.397783	0.0020105	0.00321414	4
PLA2G6	22q13.1	-0.385275	0.000190662	0.000342951	4
PLEKHH3	17q21.2	0.448582	8.93806e-07	2.02025e-06	4
PMEPA1	20q13.31	0.247872	0.0321264	0.0435773	4
PML	15q24.1	-0.361872	1.06474e-08	2.83099e-08	4
PNISR	6q16.2	-0.685318	5.0952e-20	2.91495e-19	4
PNKD	2q35	0.845406	1.23938e-20	7.34631e-20	4
POLR2F	22q13.1	-2.98921	2.96705e-55	1.07179e-53	4
POM121L9P	22q11.23	-1.1314	1.24649e-14	5.07384e-14	4
POMP	13q12.3	0.461129	2.08222e-10	6.32249e-10	4
PON3	7q21.3	-1.73573	4.88987e-08	1.23085e-07	4
PPARA	22q13.31	-1.81546	1.96961e-60	9.43701e-59	4
PPM1H	12q14.1-q14.2	0.717455	6.17003e-08	1.54072e-07	4
PPP1R26	9q34.3	0.437414	2.79418e-09	7.78768e-09	4
PPP6R1	19q13.42	0.735568	6.9655e-32	7.60419e-31	4
PPT1	1p34.2	0.643962	3.17332e-15	1.34074e-14	4
PPT2	6p21.32	-0.224616	0.000679202	0.00114892	4
PRCC	1q23.1	0.813913	7.84769e-43	1.47736e-41	4
PRDM8	4q21.21	-1.60429	4.96237e-32	5.44322e-31	4
PRKAG2	7q36.1	-0.53671	1.76052e-18	9.16905e-18	4
PRLR	5p13.2	1.63494	1.70663e-28	1.57208e-27	4
PRMT3	11p15.1	0.295107	6.83398e-06	1.4244e-05	4
PRPF19	11q12.2	0.608251	1.89796e-20	1.11328e-19	4
PRR12	19q13.33	0.452661	1.40534e-10	4.30989e-10	4
PRSS8	16p11.2	2.26906	1.99106e-41	3.46028e-40	4
PSEN1	14q24.2	0.205965	5.74341e-05	0.000109164	4
PSEN2	1q42.13	0.801371	2.232e-29	2.13736e-28	4
PSG4	19q13.31	-1.40752	4.31253e-06	9.17069e-06	4
PSG5	19q13.31	-0.514628	0.00934289	0.0136846	4
PSMD12	17q24.2	0.477026	3.946e-09	1.0863e-08	4
PSMD5	9q33.2	0.199219	0.00358791	0.00556726	4
PTBP2	1p21.3	-0.620002	3.93273e-17	1.86519e-16	4
PTGDR	14q22.1	-1.28407	7.77112e-15	3.20531e-14	4
PTOV1	19q13.33	0.6874	6.41542e-18	3.2168e-17	4
PTPRS	19p13.3	-0.832234	8.1578e-14	3.15453e-13	4
PUS10	2p16.1-p15	0.132901	0.0266627	0.0365888	4
PUS7	7q22.3	0.30199	9.77891e-06	2.00862e-05	4
R3HDM1	2q21.3	0.294597	3.4804e-07	8.16214e-07	4
RAB11FIP2	10q26.11	-0.777617	1.24716e-30	1.27008e-29	4
RAB11FIP4	17q11.2	1.42379	4.9178e-40	7.86791e-39	4
RAB21	12q21.1	-0.130461	0.0194205	0.0272272	4
RAD51	15q15.1	2.14587	9.92964e-59	4.36366e-57	4
RAD51B	14q24.1	-0.735231	1.21538e-15	5.26066e-15	4
RAD54L	1p34.1	2.28373	1.3297e-60	6.44941e-59	4
RAP1GDS1	4q23	0.521581	8.53569e-10	2.46978e-09	4
RASA2	3q23	-0.513133	1.2307e-14	5.01326e-14	4
RASGRP3	2p22.3	-0.439681	7.53262e-08	1.86796e-07	4
RBM41	Xq22.3	-0.223996	0.00327082	0.00510017	4
RBM8A	1q21.1	0.489131	7.54789e-24	5.39655e-23	4
RBMS1	2q24.2	-1.20549	3.07754e-36	4.10507e-35	4
RECQL	12p12.1	-0.238728	0.00932205	0.0136562	4
REPS2	Xp22.2	1.08516	5.87058e-11	1.85385e-10	4
RFX7	15q21.3	-0.174556	0.0149618	0.0212887	4
RGS6	14q24.2	-3.52457	6.92684e-55	2.46032e-53	4
RGS8	1q25.3	1.37977	2.06249e-13	7.75273e-13	4
RHD	1p36.11	-0.656515	0.00194938	0.00312113	4
RIBC1	Xp11.22	1.0159	1.41022e-18	7.38786e-18	4
RILPL1	12q24.31	-0.220465	0.00176756	0.00284421	4
RMDN1	8q21.3	-0.156302	0.0248208	0.0342332	4
RNASEH2A	19p13.13	1.51935	3.2935e-58	1.40268e-56	4
RND1	12q13.12	1.78314	5.66281e-30	5.56362e-29	4
RNF157	17q25.1	-1.56556	8.90442e-23	5.97046e-22	4
RPL10	Xq28	-0.327677	3.48323e-06	7.46527e-06	4
RPL13AP3	14q22.3	-0.375253	0.000517764	0.000888249	4
RRM1	11p15.4	0.43719	2.97536e-10	8.93222e-10	4
RTKN2	10q21.2	1.75982	8.12977e-48	2.00326e-46	4
RXFP1	4q32.1	0.98949	6.39942e-09	1.73523e-08	4
S1PR3	9q22.1	0.439183	0.00025801	0.000457501	4
SAMD8	10q22.2	-0.667899	1.44175e-15	6.21225e-15	4
SAMSN1	21q11.2	0.650409	3.5941e-08	9.14109e-08	4
SCAI	9q33.3	-0.346048	3.0853e-07	7.26768e-07	4
SCARA3	8p21.1	-1.01691	1.61775e-14	6.53651e-14	4
SCCPDH	1q44	1.03051	7.03561e-25	5.29358e-24	4
SDC1	2p24.1	1.93035	7.18091e-33	8.1555e-32	4
SDCCAG3	9q34.3	0.336322	3.17159e-10	9.50273e-10	4
SDPR	-	-4.40957	1.62719e-94	9.35565e-92	4
SDR16C5	8q12.1	0.968742	0.00315409	0.00493126	4
SEC14L4	22q12.2	-0.99456	5.92449e-07	1.36061e-06	4
SEC23IP	10q26.11-q26.12	0.335622	2.00943e-08	5.22532e-08	4
SEC61A2	10p14	0.680743	1.73153e-20	1.01761e-19	4
SECISBP2	9q22.2	0.141049	0.00721743	0.010739	4
2019-09-02	2q37.3	-0.153108	0.000491438	0.000845556	4
2019-09-04	17q22	-1.03214	7.6859e-30	7.5165e-29	4
SEPT7P2	7p12.3	-0.154127	0.025847	0.0355504	4
SERAC1	6q25.3	-0.230974	0.00021389	0.000382488	4
SERPINA4	14q32.13	0.807723	0.000464095	0.000800006	4
SERPINF1	17p13.3	-1.09999	6.15552e-15	2.55574e-14	4
SERPING1	11q12.1	-1.38599	5.84879e-28	5.20525e-27	4
SETD8	-	0.138236	0.0109693	0.0159073	4
SFRP1	8p11.21	-5.45315	3.90103e-64	2.37662e-62	4
SFXN2	10q24.32	1.1244	5.62133e-22	3.60533e-21	4
SGSM3	22q13.1	0.182613	0.0238089	0.0329462	4
SH2D3C	9q34.11	-0.760342	1.38327e-15	5.96774e-15	4
SH3BGR	21q22.2	-0.595468	9.25014e-07	2.08788e-06	4
SH3BGRL	Xq21.1	0.579002	2.88989e-05	5.66886e-05	4
SHD	19p13.3	0.792939	3.56128e-06	7.62484e-06	4
SHMT2	12q12-q14	0.647625	8.56652e-19	4.54652e-18	4
SIDT1	3q13.2	0.935884	2.37083e-11	7.69314e-11	4
SIGLEC10	19q13.41	0.422196	0.000249161	0.000442578	4
SIK2	11q23.1	-2.17355	2.31935e-100	2.4619e-97	4
SKIL	3q26.2	0.586417	3.85679e-09	1.06301e-08	4
SLAIN1	13q22.3	-2.34876	1.89326e-27	1.63999e-26	4
SLC12A7	5p15.33	0.60756	9.32933e-20	5.25248e-19	4
SLC16A11	17p13.1	-1.9945	1.18411e-20	7.0308e-20	4
SLC22A4	5q31.1	0.299819	0.0189427	0.0265938	4
SLC25A18	22q11.21	-1.24374	5.96506e-16	2.63103e-15	4
SLC25A36	3q23	-0.425485	9.73861e-12	3.25029e-11	4
SLC25A41	19p13.3	0.512643	0.00123408	0.00202438	4
SLC29A1	6p21.1	-0.530826	4.39057e-11	1.39904e-10	4
SLC2A9	4p16.1	-0.981332	7.16283e-27	5.99939e-26	4
SLC35A2	Xp11.23	1.15683	1.46943e-66	1.02927e-64	4
SLC39A13	11p11.2	0.365726	2.76108e-08	7.09301e-08	4
SLC46A3	13q12.3	-0.502754	1.29285e-06	2.8816e-06	4
SLC4A1AP	2p23.3	0.0841979	0.0190342	0.0267128	4
SLC6A11	3p25.3	-1.07354	0.000622879	0.00105812	4
SLC6A15	12q21.31	-2.87217	8.6058e-30	8.40123e-29	4
SLC6A7	5q32	0.398318	0.0147637	0.0210253	4
SLC7A6OS	16q22.1	-0.365649	3.9443e-09	1.08594e-08	4
SLC9A7P1	12q23.1	-1.12329	3.11476e-13	1.15757e-12	4
SLCO4A1	20q13.33	-1.5642	6.09844e-18	3.0651e-17	4
SMAD3	15q22.33	-0.445084	2.32782e-08	6.02487e-08	4
SMAD9	13q13.3	-1.7347	3.79874e-49	1.00419e-47	4
SMURF1	7q22.1	-0.231331	5.60715e-06	1.18064e-05	4
SMYD5	2p13.2	0.161997	0.000365496	0.000637567	4
SNX19	11q24.3-q25	-0.265559	4.72974e-06	1.00262e-05	4
SNX27	1q21.3	0.567795	5.25968e-18	2.65757e-17	4
SOX30	5q33.3	-0.426203	0.00295018	0.00463135	4
SP110	2q37.1	0.310808	0.000559396	0.000955452	4
SP6	17q21.32	0.602166	3.96366e-05	7.65172e-05	4
SPATC1	8q24.3	1.0185	9.49918e-13	3.40024e-12	4
SPDYC	11q13.1	1.99318	2.54693e-07	6.03972e-07	4
SPINT1	15q15.1	1.43752	6.38219e-39	9.76362e-38	4
SPOPL	2q22.1	0.522447	1.09735e-09	3.14907e-09	4
SREBF1	17p11.2	1.02008	6.83016e-16	2.99919e-15	4
ST6GAL2	2q12.3	1.23928	5.50105e-11	1.74043e-10	4
ST8SIA2	15q26.1	-2.11766	7.89092e-17	3.67365e-16	4
STAMBP	2p13.1	0.0959604	0.0116265	0.0167985	4
STAP1	4q13.2	0.702406	5.81536e-05	0.000110448	4
STAP2	19p13.3	1.00984	5.13903e-21	3.12326e-20	4
STARD13	13q13.1	-0.677159	2.14144e-12	7.48283e-12	4
STEAP1	7q21.13	-1.08108	2.73166e-12	9.47329e-12	4
STIL	1p33	1.58272	1.25026e-43	2.45759e-42	4
STIM1	11p15.4	-0.505194	6.10859e-13	2.21939e-12	4
STK38	6p21.31	-0.191628	0.000941009	0.00156644	4
STK4	20q13.12	0.251869	2.11792e-05	4.21538e-05	4
STOX2	4q35.1	-2.44029	2.78028e-55	1.00696e-53	4
STRADA	17q23.3	0.153654	0.0198876	0.0278156	4
STX19	3q11.2	-2.24813	2.95993e-31	3.12025e-30	4
STX1A	7q11.23	1.18318	3.41695e-29	3.24905e-28	4
SV2A	1q21.2	-0.88167	4.35911e-08	1.10188e-07	4
SYAP1	Xp22.2	0.858509	9.04499e-29	8.43324e-28	4
SYT14	1q32.2	0.488985	0.0349884	0.0472134	4
SYT5	19q13.42	1.9521	1.28032e-12	4.54169e-12	4
TAF5	10q24.33	-0.130421	0.0183347	0.0258059	4
TAGAP	6q25.3	-0.671901	2.78306e-07	6.57763e-07	4
TAP1	6p21.32	0.859711	4.05189e-12	1.38688e-11	4
TAS2R10	12p13.2	-0.747713	5.27927e-07	1.21769e-06	4
TBC1D10B	16p11.2	0.707342	1.73008e-34	2.14495e-33	4
TBCEL	11q23.3	-0.3717	4.98422e-09	1.36382e-08	4
TBX19	1q24.2	-0.717401	7.59307e-16	3.32677e-15	4
TBX4	17q23.2	-1.30947	3.59352e-11	1.15198e-10	4
TCEAL2	Xq22.1	-3.1423	2.46304e-37	3.46988e-36	4
TCF3	19p13.3	0.660052	1.34248e-20	7.94717e-20	4
TEX10	9q31.1	-0.31205	1.5233e-10	4.65816e-10	4
TFR2	7q22.1	2.3178	1.15386e-30	1.17854e-29	4
TGDS	13q32.1	-0.440768	2.35653e-14	9.42406e-14	4
TGFBR1	9q22.33	-0.248038	0.014668	0.0208966	4
THSD1	13q14.3	-1.482	4.89563e-57	1.9329e-55	4
TIMMDC1	3q13.33	0.208395	5.97115e-06	1.2526e-05	4
TLE1	9q21.32	-1.06245	1.09917e-15	4.76887e-15	4
TLE2	19p13.3	-0.856886	9.52052e-16	4.15148e-15	4
TLR9	3p21.2	-0.583938	2.69532e-06	5.83873e-06	4
TM9SF1	14q12	0.54934	1.86858e-22	1.23194e-21	4
TMEM165	4q12	0.506569	3.89752e-21	2.38342e-20	4
TMEM199	17q11.2	0.580573	5.18381e-17	2.44176e-16	4
TMEM200C	18p11.31	-1.09483	1.07078e-10	3.31441e-10	4
TMEM214	2p23.3	0.166601	0.0011965	0.00196518	4
TMEM67	8q22.1	0.228917	0.00611864	0.00919528	4
TMPO	12q23.1	0.485967	2.0757e-10	6.30409e-10	4
TNFRSF8	1p36.22	-1.76067	1.36789e-29	1.32413e-28	4
TNFSF15	9q32	-0.463655	0.00630985	0.00946643	4
TNFSF4	1q25.1	1.83527	2.94999e-39	4.58928e-38	4
TNIP2	4p16.3	0.3424	9.23485e-07	2.08477e-06	4
TOMM34	20q13.12	0.647085	1.26819e-22	8.44176e-22	4
TOP2A	17q21.2	3.33603	2.53236e-73	2.69838e-71	4
TOPORS	9p21.1	-0.362718	4.33901e-11	1.38341e-10	4
TOX	8q12.1	-1.00218	9.24632e-09	2.47172e-08	4
TPK1	7q35	-0.526452	2.12214e-10	6.44228e-10	4
TPMT	6p22.3	0.606264	8.21612e-20	4.64268e-19	4
TPST1	7q11.21	-0.540024	4.39301e-09	1.20587e-08	4
TPTE2P1	13q12.13	-1.58933	2.98694e-25	2.30326e-24	4
TRAF6	11p12	-0.550501	3.36904e-19	1.83535e-18	4
TRAPPC4	11q23.3	0.322257	1.02321e-07	2.5063e-07	4
TRDMT1	10p13	-0.950423	2.26982e-26	1.85938e-25	4
TREM1	6p21.1	1.12429	3.1589e-09	8.7688e-09	4
TRIM14	9q22.33	0.728403	6.56215e-18	3.2856e-17	4
TRIM25	17q23.1	-0.307143	8.10586e-05	0.000151747	4
TRIM39	6p22.1	-0.106531	0.0103541	0.01508	4
TRIM4	7q22.1	-0.191694	0.000658305	0.00111496	4
TRIP4	15q22.31	0.0955779	0.0248075	0.0342165	4
TRMT6	20p12.3	0.289551	5.28793e-07	1.21949e-06	4
TSPAN9	12p13.33-p13.32	0.204195	0.00565954	0.00854862	4
TTC39C	18q11.2	0.335059	0.000178091	0.000321512	4
TTI1	20q11.23	0.348166	2.30665e-07	5.49067e-07	4
TTPAL	20q13.12	0.13457	0.0176999	0.0249646	4
TUBAL3	10p15.1	0.600529	0.00185026	0.00297105	4
TUBB1	20q13.32	-0.849496	5.82515e-09	1.58418e-08	4
TULP1	6p21.31	-0.545893	0.000384605	0.00066921	4
[truncated: 5,388 more rows]
