# Supplementary material for: Delineation of the Germline and Somatic Mutation Interaction Landscape in Triple-Negative and Non-Triple-Negative Breast Cancer
Source: Int J Genomics. 2020 Jul 6;2020:2641370. doi: 10.1155/2020/2641370 (PMC7364202; doi:10.1155/2020/2641370)
Supplement: Supplementary Materials — All additional results from the analysis are shown in the supplementary tables described. Supplementary Table SG: GWAS information-genetic variants and genes associated with an increased risk of developing breast cancer. Supplementary Table SM: somatic mutated genes significantly associated with TNBC vs. control and non-TNBC vs. control. Supplementary Table SN: nonsomatic mutated genes significantly associated with TNBC vs. control and non-TNBC vs. control. Supplementary Table S2A1: list of all somatic mutated genes significantly associated with TNBC. Supplementary Table S2A2: list of all somatic mutated genes significantly associated with non-TNBC. Supplementary Table S1: differentially expressed and uniquely somatic mutated genes between TNBC and non-TNBC. Supplementary Table SA3: significantly differentially expressed germline mutated genes with and without somatic mutations in TNBC. Supplementary Table SB3: significantly differentially expressed germline mutated genes with and without somatic mutations in non-TNBC. Supplementary Table S3A: genes containing both germline and somatic mutations significantly associated with TNBC. Supplementary Table S3B: genes containing both germline and somatic mutations significantly associated with non-TNBC. Supplementary Table S3C: a complete list of 251 genes containing both germline and somatic mutations distinguishing TNBC from non-TNBC. [file 2641370.f1.zip › mat.2641370.v2/TABLE S3B.xlsx]

## Sheet: 07.ERPBC.424.allinfo
Table S3B. Genes containing both germline and somatic mutations significantly associated with non-TNBC.
Genes	Chromosome position	Genetic variant	GWAS	Expression P-value	Mutation Events
			P-value
KMT2C	7q36.1			6.82741e-06	68
DMD	Xp21.2-p21.1	rs1293906	9e-06	5.33211e-107	41
NOTCH2	1p12	rs372562666	6e-27	1.21523e-07	27
RELN	7q22.1	rs17157903	P<0.05	2.12625e-56	22
ATM	11q22.3	rs1801516	0.0002	6.052e-12	21
PRKDC	8q11.21			6.91955e-05	21
RB1	13q14.2	rs2854344	0.007	0.000952258	20
ERBB2	17q12	rs1801201	0.02	6.43253e-13	19
ASH1L	1q22	rs10796944	7e-10	0.047171	18
MADD	11p11.2	rs11039183	6e-06	0.00555998	18
ITPR1	3p26.1	rs6787391	9e-19	8.69085e-15	17
FAM208B	10p15.1	rs55910451	4e-07	6.02373e-06	16
ABCA8	17q24.2	rs36059695	6e-08	1.22016e-56	15
ASXL2	2p23.3	rs144079028	9e-06	1.0135e-05	15
CDC42BPA	1q42.13			3.67588e-07	15
CNTNAP2	7q35-q36.1	rs10487920	3.9x10-4	1.58346e-25	15
GRIN3A	9q31.1	rs10512287	2.3x10-4	1.07768e-10	15
PIK3R1	5q13.1	rs184886	2e-06	2.21961e-43	15
TNRC6B	22q13.1	rs12483853	1e-18	1.77581e-13	15
CASZ1	1p36.22	rs199867187	1e-06	9.91009e-15	14
FRMD4A	10p13	rs10906522	1e-07	7.12797e-36	14
KCNH7	2q24.2	rs148760487	2e-08	0.013265	14
TACC2	10q26.13	rs2253762	2e-09	1.68377e-06	14
ABCC4	13q32.1	rs1926657	2e-06	0.0434243	13
ADCY9	16p13.3	rs11076805	1e-08	0.000199733	13
CCDC88C	14q32.11-q32.12	rs941764	8e-13	8.06316e-18	13
FGFR2	10q26.13	rs35054928	2E-322	8.48955e-05	13
SPTBN2	11q13.2	rs55908905	8e-06	0.00677273	13
ATR	3q23	rs1802904	0.0224	0.0169921	12
BRCA1	17q21.31	rs1799950	0.0002	6.37952e-14	12
BRCA2	13q13.1	rs11571833	3e-15	5.15162e-27	12
CASP8	2q33.1	rs3769821	4e-18	0.0483265	12
CDH12	5p14.3	rs66783663	5e-06	1.56722e-76	12
EHMT1	9q34.3	rs4634736	0.02	7.9252e-09	12
MAGI3	1p13.2	rs1230666	4e-10	0.000594383	12
MAST1	19p13.2	rs117758012	5e-07	2.71323e-06	12
ARID1B	6q25.3	rs140842923	3e-06	2.03257e-10	11
GRIK1	21q21.3	rs458685	6e-06	7.80073e-23	11
GRM3	7q21.11-q21.12	rs1989796	2e-06	0.0282475	11
KIAA2026	9p24.1	rs10975370	3e-06	2.09078e-07	11
SBF2	11p15.4	rs4345958	3e-06	9.40942e-19	11
TNS1	2q35	rs6436017	3e-10	3.75472e-104	11
TRIM46	1q22	rs4971059	5e-11	2.88946e-15	11
ZFPM2	8q23	rs12546444	8e-11	5.21435e-15	11
AGTPBP1	9q21.33	rs77674461	6e-06	3.67906e-16	10
ALS2CR11	2q33.1	rs77688320	3e-09	8.85732e-18	10
ATAD5	17q11.2	rs7223535	4e-10	3.6482e-10	10
BLM	15q26.1	rs8037430	0.001	1.78828e-34	10
C9orf3	9q22.32	rs7862618	5e-06	1.04706e-10	10
CEP192	18p11.21	rs58685532	4e-06	0.000524281	10
DNM3	1q24.3	rs1894633	2e-06	2.0092e-11	10
JMJD1C	10q21.3	rs34044188	3e-07	4.36708e-24	10
L3MBTL3	6q23.1	rs6569648	3e-12	1.82556e-09	10
LAMB2	3p21.31	rs61729152	6e-06	2.11344e-08	10
PDS5B	13q13.1	rs113855064	1e-07	0.0419893	10
SIK3	11q23.3	rs201462698	1e-06	1.40618e-12	10
SORBS1	10q24.1	rs10450393	0.01	2.5174e-82	10
ARHGEF5	7q35	rs720475	1e-11	0.0123089	9
BRIP1	17q23.2	deletion	0.002	1.62435e-30	9
COL11A1	1p21.1	rs1451036	0.0082	3.00391e-65	9
COL8A1	3q12.1	rs11298677	5e-09	1.93145e-14	9
DMBT1	10q26.13	rs11523871	0.002	2.41411e-12	9
DOT1L	19p13.3	rs3815308	7e-06	3.10444e-08	9
FHOD3	18q12.2	rs9956546	2.9e-06	2.117e-31	9
FOXP1	3p13	rs6805189	5e-08	0.0444973	9
GPC5	13q31.3	rs3029748	4e-06	5.6827e-20	9
GREB1	2p25.1	rs113084984	5e-06	9.66544e-08	9
MLLT10	10p12.31	rs7098100	1e-18	6.7765e-10	9
MYO9B	19p13.11	rs7249698	4e-07	7.14892e-05	9
OTUD7B	1q21.2	rs12048493	9e-14	1.33845e-12	9
PDE4D	5q11.2-q12.1	rs1353747	4e-09	0.00148692	9
PRDM2	1p36.21	rs2235515	0.02	1.37e-13	9
RET	10q11.21			3.30264e-20	9
TRAK2	2q33.1	rs2714486	7e-10	0.00269897	9
TTC28	22q12.1	rs62235681	2e-37	3.76213e-62	9
WRN	8p12	rs1346044	0.02	4.38565e-13	9
ABCF1	6p21.33	rs3132610	1e-06	1.42673e-06	8
ADCY3	2p23.3	rs6725517	3e-12	3.27714e-22	8
ARHGAP5	14q12	rs140783387	3e-07	1.78149e-16	8
ASTN2	9q33.1	rs1895062	1e-14	0.000827001	8
COL1A1	17q21.33	rs2075555	8e-08	6.17021e-43	8
COL5A2	2q32.2	rs73034872	8e-06	1.79151e-26	8
CTSF	11q13.2	rs11344495	2e-06	0.000367973	8
CUX1	7q22.1	rs71559437	5e-12	0.00165689	8
EWSR1	22q12.2	rs132390	3e-09	9.06834e-07	8
EXOC3	5p15.33	rs190811224	5e-06	0.0203652	8
HIVEP3	1p34.2	rs79724016	4e-08	0.0198325	8
IGF1R	15q26.3	rs1546713	0.03	0.00136397	8
KLHL14	18q12.1	rs191218575	8e-06	2.45763e-09	8
KRIT1	7q21.2	rs35522438	1e-09	0.00189262	8
MCC	5q22.2	rs6890833	0.034	2.55026e-14	8
MCTP2	15q26.2	rs12907709	0.022	4.01679e-26	8
MSH6	2p16.3	rs3136337	0.0339	6.8632e-07	8
PARP8	5q11.1	rs35951924	1e-11	0.000104436	8
PMS1	2q32.2	rs5743072	0.028	9.90532e-05	8
SATB1	3p24.3	rs141634179	6e-06	7.50548e-32	8
SMG6	17p13.3	rs16952006	3e-06	1.2596e-11	8
SNX25	4q35.1	rs3112891	0.003	0.00276862	8
TET2	4q24	rs62331150	2e-11	0.00180871	8
TRPS1	8q23.3	rs13277568	8e-07	1.49316e-19	8
XPC	3p25.1	rs3731054	0.0311	2.33817e-10	8
ARHGEF28	5q13.2	rs157554	7e-06	1.0588e-32	7
ATF7IP	12p13.1	rs17221259	7e-06	0.00316467	7
BAIAP2L1	7q21.3-q22.1	rs79518236	1e-07	2.74793e-18	7
BTNL8	5q35.3	rs7711990	8.4x10-5	1.98836e-11	7
DNMT3A	2p23.3	rs113953597	1e-08	3.55192e-17	7
EBF1	5q33.3	rs11135046	5e-31	2.2663e-85	7
ESR1	6q25.1-q25.2	rs60954078	3e-54	9.83295e-17	7
FANCA	16q24.3	rs1800330	0.0148	2.49751e-29	7
FANCC	9q22.32	rs4744443	0.0205	5.85812e-05	7
HCN1	5p12	rs930395	2e-58	8.52758e-13	7
KIRREL3	11q24.2	rs6590224	1e-05	6.32562e-07	7
NEBL	10p12.31			9.19259e-07	7
NNT	5p12	rs35029702	1e-07	0.0355172	7
NRG3	10q23.1	rs76340606	4e-06	1.45856e-10	7
PLCG2	16q24.1	rs7192724	3e-06	1.95668e-38	7
PRICKLE2	3p14.1			5.57913e-22	7
PTHLH	12p11.22	rs7297051	3e-60	1.93886e-11	7
REV1	2q11.2			4.47899e-26	7
SEC16B	1q25.2	rs575908	3e-06	5.80276e-12	7
SETBP1	18q12.3	rs9954058	3e-13	6.36244e-11	7
SLC12A3	16q13	rs11646723	4e-06	0.0338212	7
SMC2	9q31.1	rs4742903	2e-07	0.000183114	7
TEKT5	16p13.13	rs12918713	1e-07	4.83304e-26	7
XRN1	3q23	rs12635931	0.0134	1.79598e-07	7
ZBTB38	3q23	rs34207738	3e-15	4.03602e-22	7
ZC3H7B	22q13.2	rs73176670	1e-08	1.47447e-11	7
BCAS1	20q13.2	rs375506010	5e-06	1.25789e-19	6
BCL2L11	2q13	rs71801447	4e-08	0.0002526	6
CBX8	17q25.3	rs8082452	1e-10	1.87168e-42	6
CHEK2	22q12.1	rs62235681	2e-37	4.47906e-15	6
CREB5	7p15.1-p14.3	rs17156577	4e-09	6.35203e-68	6
DAP3	1q22	rs348196	2e-08	1.19366e-40	6
DSEL	18q22.1	rs17827708	0.009	6.57482e-19	6
EBF2	8p21.2	rs13256025	2e-07	6.50134e-47	6
EGFR	7p11.2	rs12718945	4e-06	2.90423e-73	6
EHMT2	6p21.33	rs535586	0.01	1.5748e-20	6
EXT1	8q24.11	rs10103490	4e-06	0.000124283	6
FAF1	1p32.3	rs140945602	7e-08	2.24698e-05	6
GLG1	16q23.1	rs10871290	4e-07	6.07557e-27	6
GNB3	12p13.31	rs5443	0.02	0.0128077	6
GPR161	1q24.2	rs60504827	2e-07	5.13175e-11	6
KCNJ6	21q22.13	rs4817896	0.024	1.03946e-08	6
MAP4	3p21.31	rs145407011	1e-06	1.36069e-16	6
MAPT	17q21.31	rs62061734	8e-12	0.0180205	6
MAST2	1p34.1	rs12077974	2e-07	8.95715e-20	6
MSH2	2p21-p16.3	rs10179950	0.0007	1.12828e-05	6
MSH3	5q14.1	rs6151904	0.0124	0.0236353	6
MYT1	20q13.33	rs6062356	3e-06	1.29314e-22	6
PALB2	16p12.2	deletion	0.0004	9.28728e-14	6
PCM1	8p22	rs11779988	2e-06	0.00689871	6
RIN3	14q32.13	rs11627032	4e-11	2.9631e-09	6
RPS6KA3	Xp22.12			1.54539e-35	6
SLC4A7	3p24.1	rs4973768	5e-57	0.0410323	6
SLC6A3	5p15.33	rs2617583	9e-07	0.0314174	6
XRCC4	5q14.2	rs10050830	0.0018	2.75254e-11	6
ZMIZ1	10q22.3	rs1268974	4e-36	0.0154068	6
ZNRF3	22q12.1	rs62235753	3e-20	0.0217864	6
ABO	9q34.2			5.30451e-17	5
ACO2	22q13.2	rs117078955	1e-06	0.0273747	5
AHRR	5p15.33	rs116095464	4e-09	0.000138372	5
ATXN7	3p14.1	rs3821902	3e-12	3.11144e-09	5
AURKA	20q13.2			1.254e-62	5
CCDC30	1p34.2	rs113319441	6e-06	9.50525e-05	5
CDKAL1	6p22.3	rs2223621	3e-10	0.0110688	5
CTNNA3	10q21.3	rs186036693	2e-06	6.57575e-27	5
DDX58	9p21.1	rs1133071	3e-06	1.55416e-07	5
ECHDC1	6q22.33	rs2180341	3e-08	7.95234e-40	5
FGFR4	5q35.2			1.50514e-05	5
FOXM1	12p13.33	rs2074985	0.034	2.03346e-70	5
GAREM	18q12.1	rs117618124	6e-12	6.32831e-11	5
KLHL38	8q24.13	rs58847541	6e-13	8.77482e-12	5
LGR6	1q32.1	rs6678914	3e-12	1.83891e-26	5
LRRN2	1q32.1	rs4245739	2e-12	3.20362e-10	5
MKL1	22q13.1-q13.2	rs66987842	3e-35	1.73446e-08	5
MTR	1q43	rs1805087	0.02	0.0015971	5
NKAPL	6p22.1			1.36403e-85	5
PBX1	1q23.3	rs1387389	4e-06	1.48561e-11	5
PCSK7	11q23.3	rs77683187	2e-06	3.11395e-39	5
PHLDB3	19q13.31	rs66849333	1e-06	8.58868e-31	5
PIK3R3	1p34.1	rs1707302	3e-08	1.36265e-12	5
POLR2J	7q22.1	rs369574511	2e-07	7.83589e-14	5
PRKG1	10q11.23-q21.1	rs1937680	3e-07	6.85937e-07	5
PTGS2	1q31.1	rs20417	0.002	7.87049e-47	5
TCF7L2	10q25.2-q25.3	rs10885405	5e-14	4.8601e-37	5
TLR1	4p14	rs6815814	6e-13	1.08647e-09	5
TNIP3	4q27	rs17051310; rs13116936	2e-06	0.00142263	5
TTBK1	6p21.1	rs111342015	9e-08	1.95782e-12	5
TTLL1	22q13.2	rs28599928	2e-06	4.32676e-06	5
XPA	9q22.33	rs4284139	0.0284	4.51825e-09	5
XPNPEP3	22q13.2	rs62237039	5e-09	5.11934e-05	5
ZNF577	19q13.41	rs10411161	7e-06	1.24093e-05	5
AACS	12q24.31	rs7307700	0.02	0.000264074	4
ALX4	11p11.2	rs3853291	3e-07	2.21916e-43	4
APEX1	14q11.2	rs1048945	0.0278	1.66171e-05	4
ARHGAP24	4q21.23-q21.3	rs71599425	6e-06	2.40639e-36	4
ARPC1B	7q22.1			8.18979e-24	4
BAHCC1	17q25.3	rs8074440	3e-06	6.24704e-07	4
BTN2A1	6p22.2	rs13195401	2e-09	8.18952e-11	4
CD180	5q12.3	rs1697139	9e-06	0.00973285	4
CD34	1q32.2	rs2724379	2e-07	1.15302e-72	4
CDCA7L	7p15.3	rs7971	2e-08	1.22333e-09	4
CDYL2	16q23.2	rs7500067	4e-27	3.13599e-12	4
CHST9	18q11.2	rs1436904	1e-14	2.04564e-35	4
CMIP	16q23.2-q23.3	rs7185203	0.0075	0.00717941	4
EFR3B	2p23.3	rs1971136	5e-09	4.22866e-08	4
EXO1	1q43	rs72755295	2e-14	2.98984e-73	4
FAM20A	17q24.2	rs11655740	7e-06	4.68163e-18	4
FANCG	9p13.3	rs4986940	0.0279	6.04628e-19	4
FGFR3	4p16.3			1.01553e-16	4
GATAD2A	19p13.11	rs2965183	6e-12	2.70779e-17	4
HELQ	4q21.23			2.79857e-33	4
HSD17B2	16q23.3	rs56169712	7e-06	4.6232e-20	4
INTS10	8p21.3	rs7017697	1e-06	8.12873e-14	4
KANSL1	17q21.31	rs2532263	7e-13	0.000105101	4
KCNIP4	4p15.31-p15.2			2.12891e-15	4
MAPK10	4q21.3	rs11284646	4e-06	4.96635e-26	4
MDM4	1q32.1	rs4245739	3e-23	9.744e-05	4
NBN	8q21.3	657del5	1.18x10-4	0.000290324	4
NCOA1	2p23.3	rs200648189	1e-08	1.26949e-18	4
NELFA	4p16.3	rs16342	1e-06	1.36645e-08	4
PIP4K2A	10p12.2	rs56333866	3e-08	0.0161086	4
PIWIL4	11q21	rs649944	0.024	4.02404e-44	4
PKD2	4q22.1	rs2725207	6e-07	1.405e-47	4
PKLR	1q22	rs7524950	3e-09	0.00179554	4
PLA2G6	22q13.1	rs4820318	1e-13	0.000342951	4
POMP	13q12.3	rs9579199	8e-06	6.32249e-10	4
POR	7q11.23	rs10262966	0.03	2.34033e-06	4
RAD51	15q15.1	rs2304579	0.0044	4.36366e-57	4
RAD51B	14q24.1	rs765899; rs757369; rs10132579; rs2842347; rs737387; rs2842346	2e-06	5.26066e-15	4
RASA2	3q23	rs6776003	3e-10	5.01326e-14	4
RBBP8	18q11.2	rs9675999	7e-07	0.0232898	4
RTKN2	10q21.2	rs66964413	5e-09	2.00326e-46	4
SEC14L4	22q12.2	rs187201341	1e-06	1.36061e-06	4
SIK2	11q23.1	rs505372	3e-06	2.4619e-97	4
SLC12A2	5q23.3	rs36715	4e-06	0.00245865	4
SLC22A4	5q31.1	rs6860806	8e-08	0.0265938	4
SMAD3	15q22.33	rs151090251	2e-06	6.02487e-08	4
SREBF1	17p11.2	rs187408367	8e-07	2.99919e-15	4
SYT6	1p13.2	rs2774307	8e-06	0.00133787	4
TGFBR2	3p24.1	rs17838698	2e-14	1.09717e-73	4
TMEM104	17q25.1	rs62084913	9e-06	2.7755e-14	4
TOX3	16q12.1	rs4784227	7e-201	1.94079e-09	4
TPK1	7q35	rs13230714	1e-06	6.44228e-10	4
USP28	11q23.2	rs71063528	8e-07	0.000141349	4
VMP1	17q23.1	rs61495451	3e-06	1.18631e-13	4
WDR43	2p23.2	rs4577244	2e-09	0.0128058	4
XRCC1	19q13.2	rs2854509	0.0093	2.39821e-12	4
ZNF101	19p13.11	rs72396995	1e-07	1.76793e-05	4
ZNF45	19q13.2	rs375066	2e-14	4.9268e-05	4
ZNF704	8q21.13	rs6473252	8e-07	4.06115e-10	4
ADH1C	4q23	rs698	0.02	2.87394e-56	3
AKT1	14q32.33			2.16734e-16	3
ANO9	11p15.5	rs11410354	2e-06	5.12921e-29	3
ARRDC3	5q14.3	rs12110303	1e-11	8.11235e-51	3
BBS2	16q13	rs2303282	3e-07	3.18509e-29	3
CABLES1	18q11.2	rs11082321	7e-07	0.00240229	3
CCDC33	15q24.1	rs12904134	8e-06	0.0246913	3
CD46	1q32.2	rs5780403	9e-06	6.49988e-08	3
CDH2	18q12.1	rs36194942	1e-08	2.19058e-13	3
CDK6	7q21.2	rs3757823	0.004	1.10081e-20	3
CLK1	2q33.1	rs114962751	7e-08	7.63135e-17	3
CPEB3	10q23.32	rs72807246	3e-06	6.14694e-07	3
DCLRE1B	1p13.2	rs11552449	5e-11	0.0383328	3
DNAJC1	10p12.31	rs72810771	2e-19	1.42537e-26	3
ECHDC3	10p14	rs12358475	2e-06	1.12324e-27	3
ELL	19p13.11	rs4808801	5e-28	0.000758596	3
ERCC2	19q13.32	rs1799793	1e-05	1.59533e-09	3
FANCE	6p21.31	rs4713858	0.0002	1.46773e-11	3
FILIP1L	3q12.1	rs9833888	5e-10	3.33822e-22	3
GRHL1	2p25.1	rs113577745	4e-10	0.00161436	3
HEPACAM	11q24.2			3.46523e-81	3
HS6ST3	13q32.1	rs1924587	4.6x10-4	8.31447e-09	3
HSPA4	5q31.1	rs6596100	8e-09	3.03112e-15	3
INSC	11p15.2	rs5789877	2e-06	6.71889e-13	3
IRF1	5q31.1	rs736801	8e-08	1.15444e-06	3
KLHL18	3p21.31	rs146331761	5e-07	0.0487628	3
MRPS30	5p12	rs10941679	6e-73	3.79817e-12	3
NIPAL1	4p12	rs199501877	4e-07	2.10463e-19	3
NPAT	11q22.3			1.34264e-07	3
NR3C1	5q31.3	rs2963155	7e-06	3.42413e-56	3
NTN1	17p13.1	rs3785982	8e-06	0.018935	3
PFKFB4	3p21.31	rs13079292	8e-06	6.60901e-47	3
PHF20	20q11.22-q11.23	rs201177249	4e-06	1.89211e-05	3
PITPNB	22q12.1	rs62235635	1e-27	3.07501e-05	3
PRSS42	3p21.31	rs56387622	5e-19	2.76472e-11	3
SEMA4A	1q22	rs11264454	7e-07	7.53896e-11	3
SGCE	7q21.3	rs111307654	1e-12	5.32136e-26	3
SH3TC2	5q32	rs250677	8e-06	8.32092e-59	3
SNRPB	20p13			1.22642e-32	3
TBC1D29	17q11.2	rs111780165	8e-08	0.0291011	3
TPD52	8q21.13	rs1042638	0.002	1.52271e-52	3
TSPAN16	19p13.2	rs322144	7e-09	3.70491e-06	3
USP38	4q31.21	rs34853779	9e-06	0.00311045	3
ZNF165	6p22.1	rs34662244	3e-09	8.27445e-10	3
ACAT1	11q22.3			2.66454e-13	2
ADSSL1	14q32.33	rs10623258	2e-08	0.00153941	2
ALS2CR12	2q33.1	rs1830298	2e-16	0.0120641	2
ANKLE1	19p13.11	rs67397200	3e-37	0.0132773	2
ANKRD16	10p15.1	rs2380205	5e-07	3.10895e-07	2
ANXA13	8q24.13	rs970821	2e-12	0.00859778	2
APOBEC3A	22q13.1	rs12628403	4e-06	0.016882	2
ARL17B	17q21.31	rs2732699	1e-10	0.00719201	2
ATE1	10q26.13	rs111605422	9e-13	0.000204965	2
AURKAIP1	1p36.33	rs2273535	<0.05	2.81606e-10	2
BARD1	2q35	rs108108	0.04	2.608e-28	2
BBOX1	11p14.2	rs11354714	3e-06	6.85875e-41	2
BCAS4	20q13.13	rs6020772	1e-06	7.59342e-61	2
CASP10	2q33.1	rs13010627	0.005	2.44456e-23	2
CCDC102B	18q22.1	rs17080623	5e-06	0.000170423	2
CCND1	11q13.3	rs78540526	2e-131	1.23465e-11	2
CCNE1	19q12	rs997669	0.003	8.84576e-21	2
CCSER1	4q22.1	rs9884765	5e-07	2.02168e-08	2
CDC37L1	9p24.1			9.03998e-09	2
CDKN2A	9p21.3	rs1011970	1e-15	3.14522e-22	2
CEP55	10q23.33	rs140936696	4e-08	3.02598e-81	2
CFLAR	2q33.1	rs182731523	8e-08	1.15522e-50	2
CHADL	22q13.2			0.00162929	2
CHEK1	11q24.2	rs3731426	0.0012	1.12865e-23	2
CMSS1	3q12.1	rs9833888	5e-10	0.00290801	2
CYP1B1	2p22.2	rs1056836	0.006	0.00114564	2
DPY19L2P2	7q22.1	rs6946892	1e-07	0.0176496	2
EGR2	10q21.3	rs61865900	2e-09	4.6226e-46	2
EMID1	22q12.2	rs132390	3e-09	0.000254483	2
EPSTI1	13q14.11	rs11383827	4e-06	2.36498e-09	2
FAM126B	2q33.1	rs114962751	7e-08	1.77129e-05	2
FGF10	5p12	rs10941679	6e-73	1.6556e-13	2
FNDC3B	3q26.31	rs12152414	5e-06	1.05337e-12	2
FOXK2	17q25.3	rs62079673	1e-06	9.44709e-15	2
FTO	16q12.2	rs62048402	4e-23	1.77658e-29	2
HIST1H2BD	6p22.2	rs17598658	2e-09	7.60954e-51	2
HIST2H2BF	1q21.2	rs57324102	6e-06	6.75328e-16	2
INCENP	11q12.3	rs7937840	1e-06	7.41962e-10	2
IST1	16q22.2	rs71695136	7e-07	8.34141e-10	2
KDELC2	11q22.3	rs11374964	4e-13	8.57317e-16	2
KIAA0907	1q22	rs11406084	7e-06	2.13012e-14	2
KIAA1644	22q13.31	rs201681753	3e-06	9.23128e-08	2
KLF4	9q31.2	rs865686	2e-10	1.19185e-57	2
LMX1B	9q33.3	rs10760444	9e-09	8.40722e-19	2
MRPL23	11p15.5	rs217727	4e-14	2.99061e-12	2
NREP	5q22.1	rs6882649	4e-09	1.12295e-26	2
NXPH1	7p21.3	rs765855	4e-06	0.00016311	2
PAX9	14q13.3	rs7149262	2e-21	8.39976e-16	2
POLK	5q13.3	rs5744680	0.027	3.96424e-08	2
PPA2	4q24	rs77928427	3e-08	0.000155928	2
PPP2R2B	5q32	rs9325024	1.7x10-5	8.19768e-41	2
PRC1	15q26.1	rs77554484	1e-15	2.23484e-58	2
RAB3C	5q11.2	rs10472076	1e-08	1.32764e-18	2
RALY	20q11.22	rs2284378	1e-08	1.17969e-17	2
RGS10	10q26.11	rs9421352	1e-07	2.9046e-15	2
RNF115	1q21.1	rs12405132	6e-10	6.76195e-09	2
RRS1	8q13.1	rs10808749	0.03	1.75299e-15	2
SKAP2	7p15.2	rs1024454	0.0067	1.02383e-41	2
SLC14A2	18q12.3	rs9952980	2e-13	3.91968e-23	2
SSBP4	19p13.1	rs7258465	3e-28	3.6963e-11	2
TAB2	6q25.1	rs9485372	4e-12	1.44303e-09	2
TERT	5p15.33	rs10069690	2e-35	1.04787e-14	2
TNNT3	11p15.5	rs909116	7e-07	2.78898e-38	2
TRAF3	14q32.32	rs368131309	4e-06	0.0181398	2
VGLL3	3p12.1	rs13066793	1e-09	3.24392e-32	2
XRCC2	7q36.1	rs3218536	0.03	5.3965e-37	2
YJEFN3	19p13.11	rs2304098	2e-11	0.0297893	2
ZFP57	6p22.1	rs3116813	6e-07	0.000643334	2
ZNF184	6p22.1	rs34196306	1e-09	0.0196203	2
ZNF19	16q22.2	rs8050871	3e-06	0.00821604	2
ZNF365	10q21.2	rs10995201	2e-51	0.000440077	2
ZNF765	19q13.41			0.000878977	2
ACER2	9p22.1	rs67500807	4e-06	2.37424e-07	1
ADH1B	4q23	rs1042026	0.02	9.78507e-43	1
ALPL	1p36.12	rs3738097	0.036	5.17295e-39	1
AMFR	16q13	rs2432539	4e-08	0.0110764	1
ARL4A	7p21.3	rs7810893	4e-06	6.29379e-52	1
B3GNTL1	17q25.3	rs898097	2e-06	3.45731e-07	1
BCKDHB	6q14.1	rs12207986	2e-09	1.13014e-14	1
BRSK1	19q13.42	rs1172821	4e-06	1.76684e-08	1
C11orf80	11q13.2	rs7570	8e-06	2.41393e-09	1
CACFD1	9q34.2	rs3124765	2e-06	6.5143e-61	1
CCL28	5p12	rs73098691	3e-06	2.67638e-37	1
CDKN1A	6p21.2	rs3829964	9e-08	0.0146043	1
CTLA4	2q33.2	rs231775	1.59x10-6	0.00715387	1
DLX2	2q31.1	rs2016394	1e-08	0.00569503	1
FGF14	13q33.1	rs9518578	0.03	5.41631e-07	1
FOXN3	14q31.3-q32.11	rs141061110	5e-06	1.99939e-57	1
FYN	6q21	rs6914091	0.017	7.04633e-25	1
GMEB2	20q13.33	rs311499	3.5x10-5	1.82058e-10	1
GSTM2	1p13.3	rs5776993	2e-07	1.18545e-19	1
GSTP1	11q13.2	rs1695	0.009	5.46643e-16	1
ICAM5	19p13.2	rs1056538	0.001	2.96216e-19	1
IGFBP3	7p12.3	rs2132572	0.01	1.35032e-15	1
INHBB	2q14.2	rs11903787	7e-10	9.76023e-21	1
KCNN4	19q13.31	rs1685191	4e-20	4.07635e-11	1
KLF12	13q22.1	rs6562760	5e-10	4.389e-07	1
KLF5	13q22.1	rs6562760	5e-10	7.34949e-22	1
LMO4	1p22.3	rs12118297	4e-08	3.43517e-08	1
LRTOMT	11q13.4	rs673478	0.02	6.82443e-11	1
MMP8	11q22.2	rs1892886	0.007	0.0293701	1
MRPL22	5q33.2	rs6890610	6e-06	1.20884e-12	1
MYEOV	11q13.3	rs614367	3e-15	5.27195e-36	1
NECAB2	16q23.3	rs2292326	0.012	2.68126e-05	1
NIPSNAP1	22q12.2	rs183421746	3e-11	1.7876e-33	1
OVOL1	11q13.1	rs3903072	2e-12	4.10975e-26	1
PCBD1	10q22.1	rs7090828	0.0088	0.000343909	1
PHGDH	1p12	rs666930	5e-08	2.92927e-16	1
PKIB	6q22.31	rs76092474	3e-06	6.42635e-20	1
POLB	8p11.21	rs6474389	0.0205	1.95222e-15	1
PPP2R1B	11q23.1	rs643506	2e-07	1.24456e-44	1
RAD52	12p13.33			1.92694e-06	1
RANBP9	6p23	rs418053	1e-13	3.78678e-08	1
RCCD1	15q26.1	rs77554484	1e-15	0.00275826	1
RNF146	6q22.33	rs2180341	3e-08	6.1746e-18	1
ROPN1L	5p15.2	rs1092913	2e-06	4.41208e-08	1
RPA1	17p13.3	rs7406062	0.0241	2.31511e-05	1
SHISA3	4p13	rs3109633	0.047	8.12195e-41	1
SOD2	6q25.3	rs4880	0.01	1.63033e-36	1
SUB1	5p13.3	rs12519859	6e-09	0.0111815	1
SUV39H2	10p13			9.36774e-10	1
TGFB1	19q13.1	rs1800470	P<0.05	1.06111e-18	1
TMEM151A	11q13.2	rs1783730	3e-07	6.07803e-08	1
TMEM69	1p34.1	rs10683143	2e-06	5.33548e-05	1
TRIM45	1p13.1	rs1048635	0.0039	4.2526e-12	1
TUBBP1	8p12	rs7834448	7e-06	0.00843012	1
TYMS	18p11.32	28bp tandem repeat	0.04	3.00913e-40	1
USP44	12q21.33	rs17356907	1e-39	3.10232e-72	1
ZNRD1	6p22.1			1.96353e-09	1
