# Supplementary material for: Delineation of the Germline and Somatic Mutation Interaction Landscape in Triple-Negative and Non-Triple-Negative Breast Cancer
Source: Int J Genomics. 2020 Jul 6;2020:2641370. doi: 10.1155/2020/2641370 (PMC7364202; doi:10.1155/2020/2641370)
Supplement: Supplementary Materials — All additional results from the analysis are shown in the supplementary tables described. Supplementary Table SG: GWAS information-genetic variants and genes associated with an increased risk of developing breast cancer. Supplementary Table SM: somatic mutated genes significantly associated with TNBC vs. control and non-TNBC vs. control. Supplementary Table SN: nonsomatic mutated genes significantly associated with TNBC vs. control and non-TNBC vs. control. Supplementary Table S2A1: list of all somatic mutated genes significantly associated with TNBC. Supplementary Table S2A2: list of all somatic mutated genes significantly associated with non-TNBC. Supplementary Table S1: differentially expressed and uniquely somatic mutated genes between TNBC and non-TNBC. Supplementary Table SA3: significantly differentially expressed germline mutated genes with and without somatic mutations in TNBC. Supplementary Table SB3: significantly differentially expressed germline mutated genes with and without somatic mutations in non-TNBC. Supplementary Table S3A: genes containing both germline and somatic mutations significantly associated with TNBC. Supplementary Table S3B: genes containing both germline and somatic mutations significantly associated with non-TNBC. Supplementary Table S3C: a complete list of 251 genes containing both germline and somatic mutations distinguishing TNBC from non-TNBC. [file 2641370.f1.zip › mat.2641370.v2/TABLE S3C.xlsx]

## Sheet: 09.TNBC.46.noERPBCsom.gwas
Table S3C. A complete list of 251 genes containing both germline and somatic mutations distinguishing TNBC from non-TNBC.
Genes	Chromosome position	SNP_ID	GWAS P.Value	Expression p.Value	Gwas Event	TNBC Mutation Event	non-TNBC Mutation Event
MAP3K1	5q11.2	rs62355902	7e-98	6.33e-29	1	1	71
DNAH11	7p15.3	rs7971	2e-08	1.3e-15	1	3	26
TBX3	12q24.21	rs1292011	4e-39	1.08e-39	1	3	24
AKAP9	7q21.2	rs10644111	3e-11	4.44e-11	1	3	22
FBN1	15q21.1	rs1876206	6e-06	1.73e-07	1	2	22
PCNT	21q22.3	rs9808759	4e-07	9.77e-11	1	2	18
NRXN3	14q24.3-q31.1	rs112056657	2e-06	2.48e-15	1	2	13
MYO10	5p15.1	rs2562343	0.0092	1.8e-41	2	4	12
ERBB4	2q34	rs13393577	9e-14	9.95e-113	1	5	11
RREB1	6p24.3	rs9379084	3e-06	2.53e-15	1	1	11
CREBBP	16p13.3	rs12920416	8e-07	4.82e-08	1	7	10
SPAG17	1p12	rs1962373	1e-06	3.23e-14	1	4	9
CNTNAP1	17q21.2	rs72826962	5e-09	1.11e-07	1	3	9
POLR2B	4q12	rs4865169	7e-06	1.05e-07	1	1	9
NUMA1	11q13.4	rs3750913	0.01	4.27e-34	2	2	8
NRIP1	21q11.2-q21.1	rs2822999	2e-11	2.8e-28	1	1	8
ZC3H11A	1q32.1	rs59867004	1e-10	4.68e-05	1	2	7
ATXN1	6p22.3	rs3819405	2e-08	6.49e-09	1	3	6
FAM83B	6p12.1	rs924712	4e-06	6.36e-12	1	1	6
RAD50	5q31.1	c.687delt	4-fold	2.52e-38	2	1	6
RIN2	20p11.23	rs4814894	7e-07	7e-05	1	1	6
SRBD1	2p21	rs17033285	0.0089	4.37e-05	2	1	6
CCDC170	6q25.1	rs60954078	3e-54	1.08e-114	1	2	5
ESRRG	1q41	rs11117758	4e-09	0.000189926	1	2	4
FBXL7	5p15.1	rs12652447	0.00056	9.17e-40	2	2	4
MN1	22q12.1	rs45589338	2e-10	1.27e-06	1	2	4
TRIT1	1p34.2	rs17570439	0.019	8.25e-43	2	1	4
MTHFR	1p36.22	rs180113	0.041	6.84e-15	2	3	3
ACAP1	17p13.1			3.65e-06		1	3
CAMK1D	10p13	rs6602595	0.0039	1.64e-07	2	1	3
CPNE5	6p21.2	rs72856431	9e-07	3.41e-09	1	1	3
NF2	22q12.2	rs140091	4e-10	6.16e-17	1	1	3
SLAMF1	1q23.3			1.61e-08		1	3
XRCC6	22q13.2	rs73161324	2e-09	2.77e-17	1	1	3
BID	22q11.21	rs8190315	P<0.05	1.9e-30	2	2	2
EMB	5q11.1	rs72765759	6e-13	6.2e-06	1	1	2
ZNF827	4q31.21-q31.22	rs6818581	9e-06	7.8e-05	1	1	2
COMT	22q11.21	rs4818	P<0.05	0.00132405	2	1	1
KLHDC7A	1p36.13	rs2992756	2e-15	5.49e-40	1	1	1
AGPAT9	4q21.23	rs1963045	2e-06	4.45e-13	1	2	-
FKBPL	6p21.32			2.11e-11		2	-
IGSF21	1p36.13	rs2992756	2e-15	3.82e-10	1	2	-
BABAM1	19p13.11	rs8170	7e-21	2.68e-06	1	1	-
MCM8	20p12.3	rs16991615	2e-09	2.25e-11	1	1	-
MYC	8q24.21	rs11780156	1e-13	2.01e-15	1	1	-
NFIX	19p13.13	rs78269692	2e-09	1.79e-14	1	1	-
ZNF365	10q21.2	rs10995201	2e-51	6.58e-11	1	4	2
EHMT1	9q34.3	rs4634736	0.02	4.61e-16	2	3	12
SYT6	1p13.2	rs2774307	8e-06	2.64e-05	1	3	4
ERBB2	17q12	rs1801201	0.02	6e-24	2	2	19
CEP192	18p11.21	rs58685532	4e-06	6.45e-08	1	2	10
PLCG2	16q24.1	rs7192724	3e-06	3.56e-43	1	2	7
NIPAL1	4p12	rs199501877	4e-07	1.25e-32	1	2	3
FNDC3B	3q26.31	rs12152414	5e-06	1.79e-24	1	2	2
ATR	3q23	rs1802904	0.0224	0.00147358	2	1	12
CASP8	2q33.1	rs3769821	4e-18	0.0322484	1	1	12
AGTPBP1	9q21.33	rs77674461	6e-06	4.39e-30	1	1	10
GPC5	13q31.3	rs3029748	4e-06	0.000111479	1	1	9
MLLT10	10p12.31	rs7098100	1e-18	1.42e-10	1	1	9
KLHL14	18q12.1	rs191218575	8e-06	0.00207193	1	1	8
BCL2L11	2q13	rs71801447	4e-08	6.87e-08	1	1	6
MKL1	22q13.1-q13.2	rs66987842	3e-35	2.81e-09	1	1	5
TLR1	4p14	rs6815814	6e-13	2.09e-13	1	1	5
INTS10	8p21.3	rs7017697	1e-06	3.41e-21	1	1	4
GRHL1	2p25.1	rs113577745	4e-10	6.11e-14	1	1	3
HS6ST3	13q32.1	rs1924587	0.00046	3.51e-20	2	1	3
TSPAN16	19p13.2	rs322144	7e-09	1.48e-06	1	1	3
CCDC102B	18q22.1	rs17080623	5e-06	0.0012018	1	1	2
NXPH1	7p21.3	rs765855	4e-06	2.9e-14	1	1	2
TRAF3	14q32.32	rs368131309	4e-06	2.09e-06	1	1	2
FRMD4A	10p13	rs10906522	1e-07	2.88e-24	1	-	14
KCNH7	2q24.2	rs148760487	2e-08	0.0305683	1	-	14
ABCC4	13q32.1	rs1926657	2e-06	1.12e-15	1	-	13
CCDC88C	14q32.11-q32.12	rs941764	8e-13	1.97e-07	1	-	13
CDH12	5p14.3	rs66783663	5e-06	5.53e-05	1	-	12
MAGI3	1p13.2	rs1230666	4e-10	1.98e-17	1	-	12
TNS1	2q35	rs6436017	3e-10	2.83e-08	1	-	11
BLM	15q26.1	rs8037430	0.001	3.35e-39	2	-	10
DNM3	1q24.3	rs1894633	2e-06	0.000619804	1	-	10
L3MBTL3	6q23.1	rs6569648	3e-12	2.41e-09	1	-	10
BRIP1	17q23.2	deletion	0.002	2.15e-08	2	-	9
FOXP1	3p13	rs6805189	5e-08	3.76e-50	1	-	9
ABCF1	6p21.33	rs3132610	1e-06	8.6e-31	1	-	8
ADCY3	2p23.3	rs6725517	3e-12	7.56e-20	1	-	8
COL1A1	17q21.33	rs2075555	8e-08	8.64e-07	1	-	8
CUX1	7q22.1	rs71559437	5e-12	0.000320692	1	-	8
EWSR1	22q12.2	rs132390	3e-09	1.25e-07	1	-	8
EXOC3	5p15.33	rs190811224	5e-06	0.00927448	1	-	8
IGF1R	15q26.3	rs1546713	0.03	7.77e-33	2	-	8
MCTP2	15q26.2	rs12907709	0.022	1.54e-20	2	-	8
PMS1	2q32.2	rs5743072	0.028	4.58e-07	2	-	8
SNX25	4q35.1	rs3112891	0.003	1.03e-22	2	-	8
TRPS1	8q23.3	rs13277568	8e-07	1.85e-11	1	-	8
XPC	3p25.1	rs3731054	0.0311	6.73e-33	2	-	8
ATF7IP	12p13.1	rs17221259	7e-06	0.0214364	1	-	7
BTNL8	5q35.3	rs7711990	8.4e-05	0.00300193	2	-	7
EBF1	5q33.3	rs11135046	5e-31	1.37e-05	1	-	7
ESR1	6q25.1-q25.2	rs60954078	3e-54	1.43e-174	1	-	7
FANCC	9q22.32	rs4744443	0.0205	6.06e-17	2	-	7
HCN1	5p12	rs930395	2e-58	2.38e-08	1	-	7
KIRREL3	11q24.2	rs6590224	1e-05	7.13e-26	2	-	7
NRG3	10q23.1	rs76340606	4e-06	0.0494791	1	-	7
PTHLH	12p11.22	rs7297051	3e-60	0.00287964	1	-	7
SLC12A3	16q13	rs11646723	4e-06	0.0010284	1	-	7
SMC2	9q31.1	rs4742903	2e-07	3.23e-07	1	-	7
CHEK2	22q12.1	rs62235681	2e-37	4.44e-37	1	-	6
EBF2	8p21.2	rs13256025	2e-07	9.95e-13	1	-	6
GLG1	16q23.1	rs10871290	4e-07	7.48e-19	1	-	6
GNB3	12p13.31	rs5443	0.02	2.72e-06	2	-	6
MSH2	2p21-p16.3	rs10179950	0.0007	6.86e-38	2	-	6
XRCC4	5q14.2	rs10050830	0.0018	0.000168532	2	-	6
ZNRF3	22q12.1	rs62235753	3e-20	0.0332139	1	-	6
AURKA	20q13.2			2.47e-23		-	5
CCDC30	1p34.2	rs113319441	6e-06	3.68e-46	1	-	5
CDKAL1	6p22.3	rs2223621	3e-10	2.5e-45	1	-	5
ECHDC1	6q22.33	rs2180341	3e-08	1.46e-13	1	-	5
NKAPL	6p22.1			0.00556983		-	5
PBX1	1q23.3	rs1387389	4e-06	3.28e-39	1	-	5
POLR2J	7q22.1	rs369574511	2e-07	6.8e-05	1	-	5
TNIP3	4q27	rs17051310; rs13116936	2e-06	1.82e-27	1	-	5
TTLL1	22q13.2	rs28599928	2e-06	0.0104775	1	-	5
ZNF577	19q13.41	rs10411161	7e-06	0.00795659	1	-	5
APEX1	14q11.2	rs1048945	0.0278	0.0235278	2	-	4
ARPC1B	7q22.1			2.12e-11		-	4
BTN2A1	6p22.2	rs13195401	2e-09	4.06e-20	1	-	4
CD180	5q12.3	rs1697139	9e-06	4.52e-18	1	-	4
CDCA7L	7p15.3	rs7971	2e-08	7.45e-21	1	-	4
CDYL2	16q23.2	rs7500067	4e-27	4.36e-61	1	-	4
CMIP	16q23.2-q23.3	rs7185203	0.0075	0.00544442	2	-	4
FAM20A	17q24.2	rs11655740	7e-06	6.68e-21	1	-	4
FGFR3	4p16.3			3.12e-13		-	4
GATAD2A	19p13.11	rs2965183	6e-12	7.63e-39	1	-	4
HSD17B2	16q23.3	rs56169712	7e-06	1.12e-18	1	-	4
KCNIP4	4p15.31-p15.2			1.1e-07		-	4
MAPK10	4q21.3	rs11284646	4e-06	0.000320499	1	-	4
MDM4	1q32.1	rs4245739	3e-23	4.7e-08	1	-	4
PIWIL4	11q21	rs649944	0.024	1.12e-28	2	-	4
PLA2G6	22q13.1	rs4820318	1e-13	0.00143013	1	-	4
POMP	13q12.3	rs9579199	8e-06	0.000575384	1	-	4
RAD51	15q15.1	rs2304579	0.0044	1.08e-20	2	-	4
RAD51B	14q24.1	rs765899; rs757369; rs10132579; rs2842347; rs737387; rs2842346	2e-06	2.24e-15	1	-	4
RASA2	3q23	rs6776003	3e-10	1.59e-13	1	-	4
RTKN2	10q21.2	rs66964413	5e-09	4.1e-18	1	-	4
SEC14L4	22q12.2	rs187201341	1e-06	1.57e-40	1	-	4
SIK2	11q23.1	rs505372	3e-06	1.92e-06	1	-	4
SLC22A4	5q31.1	rs6860806	8e-08	6.58e-29	1	-	4
SMAD3	15q22.33	rs151090251	2e-06	1.82e-11	1	-	4
SREBF1	17p11.2	rs187408367	8e-07	3.78e-20	1	-	4
TPK1	7q35	rs13230714	1e-06	0.0410556	1	-	4
USP28	11q23.2	rs71063528	8e-07	1.33e-11	1	-	4
VMP1	17q23.1	rs61495451	3e-06	4.62e-14	1	-	4
WDR43	2p23.2	rs4577244	2e-09	2.86e-44	1	-	4
ZNF45	19q13.2	rs375066	2e-14	5.8e-05	1	-	4
ZNF704	8q21.13	rs6473252	8e-07	0.000114343	1	-	4
AKT1	14q32.33			0.00223792		-	3
ARRDC3	5q14.3	rs12110303	1e-11	0.0210039	1	-	3
CABLES1	18q11.2	rs11082321	7e-07	1.11e-06	1	-	3
CDH2	18q12.1	rs36194942	1e-08	0.0157359	1	-	3
CDK6	7q21.2	rs3757823	0.004	6.62e-43	2	-	3
CLK1	2q33.1	rs114962751	7e-08	3.52e-08	1	-	3
DCLRE1B	1p13.2	rs11552449	5e-11	2.65e-33	1	-	3
DNAJC1	10p12.31	rs72810771	2e-19	2.63e-16	1	-	3
ECHDC3	10p14	rs12358475	2e-06	4.22e-05	1	-	3
FANCE	6p21.31	rs4713858	0.0002	1.7e-51	2	-	3
INSC	11p15.2	rs5789877	2e-06	0.00862548	1	-	3
IRF1	5q31.1	rs736801	8e-08	0.00460978	1	-	3
MRPS30	5p12	rs10941679	6e-73	1.73e-23	1	-	3
NTN1	17p13.1	rs3785982	8e-06	3.08e-05	1	-	3
PRSS42	3p21.31	rs56387622	5e-19	0.00103488	1	-	3
SNRPB	20p13			4.84e-08		-	3
TPD52	8q21.13	rs1042638	0.002	1.69e-05	2	-	3
USP38	4q31.21	rs34853779	9e-06	3.5e-10	1	-	3
ZNF165	6p22.1	rs34662244	3e-09	3.82e-06	1	-	3
ADSSL1	14q32.33	rs10623258	2e-08	4.87e-16	1	-	2
ALS2CR12	2q33.1	rs1830298	2e-16	2.36e-07	1	-	2
ANKLE1	19p13.11	rs67397200	3e-37	5.37e-51	1	-	2
ANKRD16	10p15.1	rs2380205	5e-07	1.08e-06	1	-	2
APOBEC3A	22q13.1	rs12628403	4e-06	1.06e-05	1	-	2
ARL17B	17q21.31	rs2732699	1e-10	0.000233954	1	-	2
ATE1	10q26.13	rs111605422	9e-13	6.12e-16	1	-	2
AURKAIP1	1p36.33	rs2273535	<0.05	0.0338915	2	-	2
BARD1	2q35	rs108108	0.04	0.000151425	2	-	2
BCAS4	20q13.13	rs6020772	1e-06	3.11e-50	1	-	2
CASP10	2q33.1	rs13010627	0.005	0.00109267	2	-	2
CCND1	11q13.3	rs78540526	2e-131	6.43e-32	1	-	2
CDKN2A	9p21.3	rs1011970	1e-15	3.18e-32	1	-	2
CFLAR	2q33.1	rs182731523	8e-08	1.27e-13	1	-	2
CHEK1	11q24.2	rs3731426	0.0012	1.79e-50	2	-	2
CMSS1	3q12.1	rs9833888	5e-10	5.16e-33	1	-	2
CYP1B1	2p22.2	rs1056836	0.006	1.81e-05	2	-	2
FGF10	5p12	rs10941679	6e-73	1.5e-21	1	-	2
FOXK2	17q25.3	rs62079673	1e-06	7.12e-22	1	-	2
FTO	16q12.2	rs62048402	4e-23	0.00862201	1	-	2
HIST1H2BD	6p22.2	rs17598658	2e-09	1.68e-12	1	-	2
HIST2H2BF	1q21.2	rs57324102	6e-06	0.0377953	1	-	2
IST1	16q22.2	rs71695136	7e-07	0.015661	1	-	2
KDELC2	11q22.3	rs11374964	4e-13	0.000160771	1	-	2
KLF4	9q31.2	rs865686	2e-10	1.47e-05	1	-	2
PAX9	14q13.3	rs7149262	2e-21	2.62e-28	1	-	2
PPA2	4q24	rs77928427	3e-08	0.000512457	1	-	2
PPP2R2B	5q32	rs9325024	1.7e-05	0.00444548	2	-	2
RAB3C	5q11.2	rs10472076	1e-08	0.000298554	1	-	2
RGS10	10q26.11	rs9421352	1e-07	1.08e-11	1	-	2
RRS1	8q13.1	rs10808749	0.03	1.3e-10	2	-	2
SKAP2	7p15.2	rs1024454	0.0067	0.00127159	2	-	2
SLC14A2	18q12.3	rs9952980	2e-13	1.48e-15	1	-	2
XRCC2	7q36.1	rs3218536	0.03	1.77e-30	2	-	2
ZFP57	6p22.1	rs3116813	6e-07	1.23e-16	1	-	2
ZNF184	6p22.1	rs34196306	1e-09	3.95e-08	1	-	2
ZNF19	16q22.2	rs8050871	3e-06	3.52e-24	1	-	2
ZNF765	19q13.41			0.015622		-	2
ACER2	9p22.1	rs67500807	4e-06	2.03e-29	1	-	1
ADH1B	4q23	rs1042026	0.02	1.24e-05	2	-	1
ALPL	1p36.12	rs3738097	0.036	4.07e-19	2	-	1
AMFR	16q13	rs2432539	4e-08	5.36e-27	1	-	1
ARL4A	7p21.3	rs7810893	4e-06	0.0420301	1	-	1
B3GNTL1	17q25.3	rs898097	2e-06	0.000651641	1	-	1
BCKDHB	6q14.1	rs12207986	2e-09	0.0115074	1	-	1
CACFD1	9q34.2	rs3124765	2e-06	9.16e-39	1	-	1
CDKN1A	6p21.2	rs3829964	9e-08	0.000164797	1	-	1
CTLA4	2q33.2	rs231775	1.59e-06	9.59e-15	2	-	1
DLX2	2q31.1	rs2016394	1e-08	4.01e-05	1	-	1
FGF14	13q33.1	rs9518578	0.03	6.53e-13	2	-	1
FOXN3	14q31.3-q32.11	rs141061110	5e-06	0.0125683	1	-	1
FYN	6q21	rs6914091	0.017	2e-14	2	-	1
GSTM2	1p13.3	rs5776993	2e-07	2.58e-13	1	-	1
ICAM5	19p13.2	rs1056538	0.001	2.41e-19	2	-	1
IGFBP3	7p12.3	rs2132572	0.01	6.95e-12	2	-	1
INHBB	2q14.2	rs11903787	7e-10	0.000253656	1	-	1
KCNN4	19q13.31	rs1685191	4e-20	7.57e-55	1	-	1
KLF5	13q22.1	rs6562760	5e-10	2.18e-35	1	-	1
LMO4	1p22.3	rs12118297	4e-08	2.22e-50	1	-	1
LRTOMT	11q13.4	rs673478	0.02	2.1e-60	2	-	1
MRPL22	5q33.2	rs6890610	6e-06	0.0354645	1	-	1
NECAB2	16q23.3	rs2292326	0.012	0.0165752	2	-	1
PCBD1	10q22.1	rs7090828	0.0088	0.0291521	2	-	1
PHGDH	1p12	rs666930	5e-08	1.9e-55	1	-	1
PKIB	6q22.31	rs76092474	3e-06	6.72e-34	1	-	1
PPP2R1B	11q23.1	rs643506	2e-07	8.52e-07	1	-	1
RCCD1	15q26.1	rs77554484	1e-15	3.12e-28	1	-	1
ROPN1L	5p15.2	rs1092913	2e-06	7.35e-38	1	-	1
RPA1	17p13.3	rs7406062	0.0241	1.51e-13	2	-	1
SHISA3	4p13	rs3109633	0.047	1.63e-10	2	-	1
SOD2	6q25.3	rs4880	0.01	1.06e-36	2	-	1
SUV39H2	10p13			3.64e-69		-	1
TMEM151A	11q13.2	rs1783730	3e-07	2.2e-09	1	-	1
TRIM45	1p13.1	rs1048635	0.0039	1.48e-10	2	-	1
TUBBP1	8p12	rs7834448	7e-06	5.22e-38	1	-	1
TYMS	18p11.32	28bp tandem repeat	0.04	1.51e-36	2	-	1
USP44	12q21.33	rs17356907	1e-39	9.06e-06	1	-	1
ZNRD1	6p22.1			8.39e-12		-	1
