# Supplementary material for: Delineation of the Germline and Somatic Mutation Interaction Landscape in Triple-Negative and Non-Triple-Negative Breast Cancer
Source: Int J Genomics. 2020 Jul 6;2020:2641370. doi: 10.1155/2020/2641370 (PMC7364202; doi:10.1155/2020/2641370)
Supplement: Supplementary Materials — All additional results from the analysis are shown in the supplementary tables described. Supplementary Table SG: GWAS information-genetic variants and genes associated with an increased risk of developing breast cancer. Supplementary Table SM: somatic mutated genes significantly associated with TNBC vs. control and non-TNBC vs. control. Supplementary Table SN: nonsomatic mutated genes significantly associated with TNBC vs. control and non-TNBC vs. control. Supplementary Table S2A1: list of all somatic mutated genes significantly associated with TNBC. Supplementary Table S2A2: list of all somatic mutated genes significantly associated with non-TNBC. Supplementary Table S1: differentially expressed and uniquely somatic mutated genes between TNBC and non-TNBC. Supplementary Table SA3: significantly differentially expressed germline mutated genes with and without somatic mutations in TNBC. Supplementary Table SB3: significantly differentially expressed germline mutated genes with and without somatic mutations in non-TNBC. Supplementary Table S3A: genes containing both germline and somatic mutations significantly associated with TNBC. Supplementary Table S3B: genes containing both germline and somatic mutations significantly associated with non-TNBC. Supplementary Table S3C: a complete list of 251 genes containing both germline and somatic mutations distinguishing TNBC from non-TNBC. [file 2641370.f1.zip › mat.2641370.v2/TABLE SA3.xlsx]

## Sheet: 07.TNBC.GWAS.gene.DEA.Som
Table SA3. Significantly differentially expressed germline mutated genes with and without somatic mutations in TNBC. (P-values in red fonts indicate significantly differentially expressed genes)
Genes name	Adjusted expression P-value	Somatic mutation events
TP53	0.626994	73
CREBBP	3.83386e-06	7
ARID1B	7.24754e-05	6
ERBB4	9.03183e-41	5
FHOD3	1.62409e-19	5
BRCA1	3.94602e-07	5
TNRC6B	9.59053e-06	5
ARHGAP24	4.05162e-44	4
DMD	2.41829e-40	4
MSH3	2.45327e-30	4
MYO10	1.55776e-25	4
RELN	8.35934e-21	4
ZFPM2	3.45914e-20	4
TRIM46	1.1401e-17	4
KIAA0907	4.49643e-16	4
ARHGAP5	6.22093e-15	4
CNTNAP2	2.35289e-05	4
SPAG17	7.67049e-05	4
EFR3B	0.000451433	4
MYT1	0.00559757	4
ZNF365	0.732401	4
EXO1	7.42934e-71	3
LAMB2	6.50831e-39	3
SETBP1	2.05296e-30	3
RALY	7.45318e-29	3
ADCY9	1.31268e-25	3
GREB1	7.12278e-24	3
TBX3	3.27878e-21	3
EGFR	7.03007e-13	3
MTHFR	8.72396e-13	3
KMT2C	2.96725e-12	3
CHST9	1.51589e-11	3
SEMA4A	3.19002e-10	3
SEC16B	1.05343e-09	3
CNTNAP1	8.69268e-09	3
ATM	1.35237e-08	3
DNAH11	3.31747e-08	3
PALB2	1.62105e-07	3
GRM3	2.47212e-07	3
AKAP9	2.70233e-06	3
NOTCH2	3.87505e-06	3
ATXN1	3.92454e-06	3
ASH1L	5.39119e-06	3
ASXL2	0.000116247	3
CASZ1	0.000682651	3
TET2	0.00311617	3
XRN1	0.0102925	3
BAHCC1	0.0279713	3
RNF19A	0.105817	3
EHMT1	0.268407	3
ANKRD26	0.356887	3
SYT6	0.364209	3
NBPF10	0.428799	3
MTMR11	0.577065	3
FOXM1	3.63764e-74	2
CCDC170	4.69861e-67	2
TTC28	3.38636e-59	2
ITPR1	9.36617e-49	2
DSEL	2.05227e-40	2
INCENP	5.33685e-39	2
PIK3R1	6.96904e-39	2
BBS2	3.3215e-36	2
FKBPL	2.35878e-34	2
BRCA2	3.86266e-31	2
HELQ	1.05765e-28	2
FANCG	1.31195e-28	2
TMEM104	4.70411e-27	2
FBXL7	2.64296e-26	2
PRKG1	5.16457e-24	2
MSH6	2.67578e-23	2
BID	7.44688e-22	2
NCOA1	1.31974e-19	2
ZBTB38	1.03855e-18	2
RB1	1.69314e-18	2
PRKDC	4.86009e-18	2
MYO9B	4.96342e-18	2
DOT1L	6.68994e-16	2
NUMA1	1.88379e-15	2
SPTBN2	1.95782e-15	2
PCSK7	4.21303e-15	2
TCF7L2	5.24681e-15	2
JMJD1C	3.11727e-14	2
FAM208B	8.23046e-14	2
SATB1	2.06442e-13	2
BCAS1	3.87991e-13	2
NRXN3	9.00221e-12	2
PARP8	1.10284e-11	2
COL5A2	6.55591e-11	2
RNF146	3.96529e-10	2
ANO9	7.63563e-10	2
KLHL38	2.44987e-09	2
PCNT	2.52633e-09	2
FBN1	3.12305e-09	2
RIN3	1.92104e-07	2
HIVEP3	1.34304e-06	2
AGPAT9	3.56233e-06	2
KIAA2026	3.63931e-06	2
MN1	7.49433e-06	2
WRN	7.67361e-06	2
TACC2	1.06334e-05	2
CTNNA3	1.09603e-05	2
EXT1	2.32839e-05	2
ZC3H7B	0.00013063	2
IGSF21	0.00016466	2
MTR	0.000178808	2
AACS	0.000315645	2
LRRN2	0.00032242	2
FBXL13	0.000947032	2
HSPA4	0.00222026	2
RBBP8	0.00351413	2
ESRRG	0.0037351	2
LGR6	0.00474272	2
OTUD7B	0.00517777	2
ALS2CR11	0.0105605	2
PHLDB3	0.0248789	2
TEKT5	0.0265772	2
ANXA13	0.0273233	2
ZC3H11A	0.0297714	2
NPAT	0.030431	2
PTPRD	0.0322214	2
CTNNA2	0.0345569	2
RET	0.0359542	2
GRIN3A	0.0579483	2
PKLR	0.088411	2
NIPAL1	0.111746	2
CYP51A1	0.129533	2
ERBB2	0.184793	2
CEP192	0.217944	2
FNDC3B	0.255162	2
DMBT1	0.337666	2
LMTK2	0.388122	2
SCAMP2	0.660291	2
SCFD2	0.874526	2
PLCG2	0.882511	2
WNK1	0.915456	2
ZNF37A	0.962241	2
CEP55	4.31258e-82	1
PRC1	1.76036e-71	1
ABCA8	3.75289e-68	1
ADH1C	1.11945e-64	1
CCNE1	2.91282e-61	1
CD34	1.59123e-59	1
PRICKLE2	4.44705e-59	1
TGFBR2	1.23793e-54	1
FANCA	4.09728e-52	1
PKD2	1.33956e-50	1
MAPT	1.56588e-49	1
SORBS1	1.63835e-47	1
XPA	2.059e-45	1
MCC	1.51599e-42	1
COL11A1	1.60749e-42	1
POLK	1.83704e-41	1
DAP3	2.59245e-38	1
BAIAP2L1	1.42365e-37	1
CPEB3	6.81478e-31	1
DNMT3A	4.51301e-30	1
FILIP1L	2.82242e-28	1
EGR2	1.13922e-27	1
CBX8	6.22078e-27	1
SIK3	1.20979e-26	1
EHMT2	1.59138e-26	1
ALX4	5.99171e-25	1
CTSF	1.03177e-24	1
RAD50	7.61054e-24	1
BABAM1	8.51133e-23	1
ATAD5	2.61455e-22	1
NIPSNAP1	1.21627e-21	1
TRAK2	1.28728e-21	1
PCM1	1.75422e-21	1
SMG6	2.89532e-21	1
CREB5	4.65149e-21	1
KLHDC7A	1.42225e-20	1
NRIP1	4.11555e-19	1
TNNT3	5.32229e-19	1
MCM8	8.57578e-18	1
ACAT1	1.03168e-17	1
GAREM	8.34581e-17	1
XRCC6	2.01472e-16	1
GRIK1	2.58683e-16	1
MAST2	2.86028e-16	1
EPSTI1	1.38851e-15	1
POR	1.87924e-15	1
MAST1	2.07315e-15	1
PRDM2	6.09012e-15	1
TRIT1	1.15409e-14	1
MAP3K1	1.71759e-14	1
SGCE	2.31053e-14	1
SLC4A7	1.5071e-13	1
GMEB2	3.39952e-13	1
RPS6KA3	3.72378e-13	1
CCSER1	5.05994e-13	1
REV1	6.59402e-13	1
LMX1B	1.28803e-12	1
RREB1	5.73506e-12	1
MAP4	7.88633e-12	1
FAF1	8.31004e-12	1
TERT	1.46918e-11	1
C11orf80	9.22358e-11	1
GPR161	1.6628e-10	1
ASTN2	1.85254e-10	1
KANSL1	1.96933e-10	1
GSTP1	2.00426e-10	1
ATXN7	4.30705e-10	1
BRSK1	1.44388e-09	1
SLC12A2	1.51144e-09	1
OR2A1	2.04927e-09	1
MYEOV	2.41837e-08	1
NF2	4.61034e-08	1
CD46	6.36061e-08	1
FAM83B	1.33397e-07	1
AHRR	2.32504e-07	1
PDS5B	4.93897e-07	1
TGFB1	7.06621e-07	1
RIN2	1.19483e-06	1
CPNE5	1.34844e-06	1
TTBK1	2.59796e-06	1
MADD	4.60189e-06	1
SLAMF1	6.03307e-06	1
BBOX1	6.6879e-06	1
KCNJ6	7.44585e-06	1
CDC42BPA	8.86107e-06	1
ZMIZ1	1.34876e-05	1
TBX1	1.42746e-05	1
OVOL1	2.32237e-05	1
EMB	2.35399e-05	1
FGFR4	3.2542e-05	1
TAB2	3.72133e-05	1
NFIX	6.43975e-05	1
ZNF827	6.83838e-05	1
MMP8	0.000110195	1
PITPNB	0.000135164	1
VDR	0.000201738	1
CAMK1D	0.000211826	1
SRBD1	0.000228307	1
SSBP4	0.000306509	1
NEBL	0.000422172	1
TBC1D29	0.00046128	1
POLR2B	0.000461545	1
PIK3R3	0.00056651	1
DDX58	0.000661207	1
C9orf3	0.000681703	1
COL8A1	0.00119174	1
ACAP1	0.00121626	1
XPNPEP3	0.00127727	1
ELL	0.00156797	1
PTGS2	0.00311659	1
ZNF101	0.00367206	1
MYC	0.00542276	1
A4GALT	0.00635452	1
TOX3	0.00641493	1
SH3TC2	0.00919065	1
COMT	0.0105981	1
CHADL	0.0108099	1
DPY19L2P2	0.0220357	1
PHF20	0.027229	1
SHBG	0.028989	1
FGFR2	0.0425565	1
SULT1E1	0.0446617	1
LPA	0.049573	1
MGMT	0.0552044	1
AGTPBP1	0.0611223	1
TP53INP2	0.102441	1
GRHL1	0.107	1
ACO2	0.129572	1
KLHL14	0.145515	1
HS6ST3	0.186604	1
SLC6A3	0.18781	1
PTPN9	0.230175	1
TRAF3	0.273018	1
SUB1	0.273138	1
ACBD5	0.288185	1
ADCY8	0.299971	1
ARHGEF5	0.365058	1
HORMAD2	0.403911	1
SNTG1	0.416681	1
NRAP	0.435592	1
H19	0.484949	1
CCDC102B	0.534493	1
TSPAN16	0.584684	1
BCL2L11	0.625764	1
TLR1	0.626553	1
GPC5	0.652504	1
INTS10	0.653856	1
MKL1	0.677911	1
FAM185A	0.723859	1
NXPH1	0.774766	1
MLLT10	0.795094	1
ATR	0.809027	1
CASP8	0.857232	1
AURKA	2.73954e-84
RAD51	1.01316e-69
FGF10	2.40147e-67
NKAPL	2.06681e-61
TNS1	1.27394e-59
ADH1B	3.25527e-59
BLM	2.2171e-57
CHEK1	5.59177e-56
NR3C1	2.12858e-55
GSTM2	1.51202e-54
ESR1	1.67673e-52
TYMS	1.22935e-51
EBF1	2.33757e-51
BCL2	2.19272e-50
KLF4	9.56004e-50
XRCC2	2.47889e-48
CDCA7	1.90659e-47
ACER2	6.62644e-47
SUV39H2	1.64626e-44
CHEK2	1.03785e-43
SNRPB	1.64311e-42
PGR	2.1719e-42
SIK2	1.03732e-40
RTKN2	2.91465e-39
GATAD2A	2.1685e-38
BRIP1	2.68144e-38
CLMP	1.47723e-37
EBF2	1.79487e-37
FOXN3	6.7861e-37
FOXK2	9.58389e-37
IGF1	1.59402e-36
FOXP1	1.0266e-35
NEK10	4.81113e-34
ARHGEF28	4.4051e-33
FTO	2.74799e-31
SBF2	3.52599e-31
ABCF1	9.1361e-31
CDKN2A	1.64807e-30
RRS1	2.08676e-30
HEPACAM	2.54313e-30
XPC	3.90223e-28
TUBBP1	3.2402e-27
CLK1	3.73253e-27
EMX2OS	1.28691e-26
ARL4A	1.34501e-26
RBX1	1.9406e-26
POLR2J	2.20458e-26
SKAP2	2.94416e-26
ARPC1B	4.31521e-26
CHRAC1	5.0793e-26
NCOA4	1.07751e-24
VGLL3	1.45123e-24
CMSS1	1.46676e-24
ZNRD1	2.6035e-24
ARRDC3	3.18677e-24
RCCD1	3.38347e-24
CCL28	1.4374e-23
RAB3C	1.47021e-23
MSH2	1.69366e-23
USP44	3.40881e-23
INHBB	7.43725e-23
RGS10	1.01373e-22
MAPK10	1.29874e-22
BARD1	1.48236e-22
SMAD3	1.29908e-21
SLC14A2	1.70747e-21
AMFR	4.23671e-21
DCLRE1B	6.09971e-21
PPP1R18	6.15704e-20
NREP	2.05046e-19
CFLAR	3.22034e-19
FANCC	3.22399e-19
GALC	2.01115e-18
CNTD1	2.86933e-18
IGFBP5	3.8982e-18
HIST1H2BD	6.92022e-18
POMP	7.80317e-18
BCAS3	9.79421e-18
NEIL1	1.0205e-17
PFKFB4	1.32054e-17
KCNIP4	2.35943e-17
CTLA4	2.88442e-17
MLK4	4.00871e-17
TPD52	5.71372e-17
ATE1	6.18962e-17
GIPR	7.58994e-17
LMO4	1.39366e-16
LRTOMT	1.56318e-16
FGF14	1.6221e-16
PPP2R2B	2.04991e-16
COL1A1	2.70484e-16
BCKDHB	3.42767e-16
ZNF19	3.92911e-16
GAPDHP72	3.96953e-16
PPP2R1B	5.06581e-16
LINC-PINT	1.4497e-15
EGOT	1.59994e-15
CCDC134	1.93649e-15
MIER3	2.01265e-15
DCLRE1C	2.24336e-14
SLC22A4	8.84576e-14
SLC7A1	9.00752e-14
CDYL2	1.33675e-13
ANKLE1	2.24867e-13
PHGDH	3.63561e-13
ECHDC3	4.26182e-13
ZNF165	1.0136e-12
PHLDA3	1.25412e-12
MRPL23	1.52654e-12
WDR43	1.94306e-12
PTHLH	2.15576e-12
ZNF704	2.31598e-12
AURKAIP1	2.99243e-12
SMC2	4.45951e-12
ABO	4.58664e-12
ZNF577	5.43062e-12
EWSR1	7.79387e-12
HSPE1P6	8.29444e-12
ALS2CR12	1.27376e-11
CDH2	2.35723e-11
CCDC30	2.44799e-11
POLB	2.6953e-11
ATP6AP1L	3.10701e-11
ECHDC1	3.4368e-11
FANCE	4.33565e-11
PRDM13	4.72202e-11
TNIP3	5.96279e-11
SEC14L4	6.48364e-11
ICAM1	7.62722e-11
IGF1R	1.36657e-10
CMC1	1.77345e-10
SIAH2	1.92445e-10
IFNG	1.99449e-10
PLA2G6	2.20807e-10
XRCC3	2.61086e-10
CDKAL1	4.57931e-10
TNF	9.06469e-10
ANKRD16	1.31503e-09
SNX25	1.76222e-09
SLC45A1	1.86301e-09
B3GNTL1	2.75021e-09
ROPN1L	3.8218e-09
DNAL4	4.17998e-09
PRDM6	4.51153e-09
ERCC2	5.39521e-09
CABLES1	1.3908e-08
SPAG6	1.40074e-08
ADSSL1	1.81697e-08
ABCC4	2.37587e-08
KCNN4	2.45227e-08
APOBEC3A	2.9231e-08
TNFSF10	4.53631e-08
HIST2H2BF	4.88498e-08
TMEM151A	5.06371e-08
KIAA1644	2.07244e-07
CASP10	2.07381e-07
APEX1	2.24559e-07
WWOX	2.42503e-07
ALPL	2.4929e-07
ZNF45	2.78928e-07
GPX4	3.82804e-07
PKMP4	3.92305e-07
FOXQ1	4.77139e-07
KDELC2	4.85694e-07
MARK2P9	5.05606e-07
XRCC1	5.85127e-07
CDC37L1	6.1193e-07
PAIP1	6.51295e-07
COX11	6.93126e-07
AKT1	7.00944e-07
KIF9-AS1	7.79646e-07
PBX1	8.16321e-07
ADAMTS7P3	8.50579e-07
ZNF184	9.72077e-07
DNAJC1	9.97058e-07
IRF1	1.00575e-06
CDKN1A	1.37088e-06
APOPT1	1.65677e-06
ATG10	2.63039e-06
SPINK8	4.7176e-06
IST1	6.36712e-06
BIN3	6.75559e-06
EMBP1	6.88129e-06
FYN	7.9246e-06
MRPL22	8.06383e-06
RANBP9	8.60578e-06
STXBP4	9.79421e-06
NELFA	1.01959e-05
DIRC3	1.06437e-05
KIRREL3	1.36037e-05
CDH12	1.40191e-05
AP4B1	1.45228e-05
DLEU1	1.84052e-05
TPK1	1.87064e-05
ARL17B	2.02018e-05
PDXK	2.8707e-05
RPL23AP53	3.48951e-05
CACFD1	3.67595e-05
TMEM69	3.88359e-05
EXOC3	5.00439e-05
YJEFN3	5.63338e-05
NBN	6.23112e-05
CHCHD3P1	6.89852e-05
MMP7	7.63042e-05
CCND1	7.84402e-05
CDK6	8.40053e-05
HNF4G	9.33037e-05
SCGN	0.000104589
CD180	0.000108421
UTS2	0.00011255
CD81	0.000113783
EMID1	0.000203823
FAM126B	0.000224161
HCN1	0.000267454
SSR3	0.000332572
KLF12	0.00036285
ARHGAP27	0.000391642
FRMD4A	0.000662606
FGFR3	0.000695404
IL1A	0.000706141
SOGA2	0.000719838
CCDC88C	0.000806207
RPA2	0.000910064
TRIM31	0.000921929
SLC12A3	0.00110959
RNF115	0.00135879
ERRFI1	0.00152104
GLG1	0.00204476
MAGI3	0.00204553
MRPS30	0.00283771
GSTM1	0.00342699
RPS27P25	0.00392795
PIWIL4	0.00482519
BCAS4	0.00488904
CASC15	0.00494725
ORAOV1	0.00496794
NEIL2	0.00551979
KRIT1	0.00626345
HSCB	0.00795248
NAPEPLD	0.00805295
PRKAG3	0.00808475
PPIL3	0.00860514
CDCA7L	0.00939086
CDKN1B	0.0107044
ANTXR1	0.0108725
SHISA3	0.0112372
XRCC4	0.0116209
KSR2	0.0128553
DHODH	0.0129713
KIAA0391	0.0130743
ZFP57	0.0165984
IGFBP3	0.0167294
TRPS1	0.0176513
LRRC25	0.018519
ZNRF3	0.0204468
ADAM29	0.0251705
RAD52	0.0253054
MCTP2	0.0300746
CITED4	0.0327528
SNUPN	0.0332489
CDKN2B	0.0357392
HMGN2P7	0.0370093
BTNL8	0.0416876
NNT	0.0430703
USP38	0.0460944
CDKN2C	0.0477433
GNB3	0.0479353
USP28	0.0529602
ZKSCAN3	0.0540281
NTN1	0.0553463
HSF2	0.0679912
RPA1	0.0732679
PEX14	0.0748134
DHFR	0.0748278
HSD17B2	0.076417
CD160	0.0894
ARL6IP1P2	0.0918484
ADCY3	0.100657
YBX2	0.104746
PKIB	0.112736
TTLL1	0.121785
KCNH7	0.140413
ZNF765	0.141033
KLHL18	0.149198
TRIM45	0.149903
RAB5CP2	0.153364
BCL2L15	0.174472
PCBD1	0.214501
CCDC33	0.225044
ATF7IP	0.233309
BTN2A1	0.276486
MDM4	0.284835
DRG2	0.294342
LINC00160	0.29698
KLF5	0.297554
SLC17A3	0.300937
PDE4D	0.311527
RAD51B	0.340232
L3MBTL3	0.351069
SLCO1B1	0.356806
SOD2	0.358212
PAX9	0.373059
GNAT3	0.385768
KRT18P41	0.398243
LSP1	0.423831
IL1B	0.429416
VMP1	0.450166
ICAM5	0.488721
PRSS42	0.533449
MPP4	0.537156
MXD1	0.542118
CASC16	0.565091
ADAMTS16	0.566842
NECAB2	0.569146
CMIP	0.587166
CYP19A1	0.595145
RASA2	0.627697
PIK3CB	0.642788
CYP1B1	0.64634
C20orf196	0.652266
FGF19	0.654082
TEX41	0.659259
NRG3	0.664997
SUCLA2P1	0.671068
INSC	0.671559
CUX1	0.709957
DNM3	0.71427
FAM20A	0.760649
WNT3	0.789004
HIST2H3DP1	0.790639
SREBF1	0.810851
PIP4K2A	0.878282
SLC25A21	0.884677
KCTD1	0.912462
PPA2	0.924387
LEKR1	0.930728
DLX2	0.933776
BRE	0.937364
RPL17P33	0.968847
PMS1	0.976201
TUSC1	0.977854
C5orf38	0.988352
DAP3P2	0.996937
