# Supplementary material for: Delineation of the Germline and Somatic Mutation Interaction Landscape in Triple-Negative and Non-Triple-Negative Breast Cancer
Source: Int J Genomics. 2020 Jul 6;2020:2641370. doi: 10.1155/2020/2641370 (PMC7364202; doi:10.1155/2020/2641370)
Supplement: Supplementary Materials — All additional results from the analysis are shown in the supplementary tables described. Supplementary Table SG: GWAS information-genetic variants and genes associated with an increased risk of developing breast cancer. Supplementary Table SM: somatic mutated genes significantly associated with TNBC vs. control and non-TNBC vs. control. Supplementary Table SN: nonsomatic mutated genes significantly associated with TNBC vs. control and non-TNBC vs. control. Supplementary Table S2A1: list of all somatic mutated genes significantly associated with TNBC. Supplementary Table S2A2: list of all somatic mutated genes significantly associated with non-TNBC. Supplementary Table S1: differentially expressed and uniquely somatic mutated genes between TNBC and non-TNBC. Supplementary Table SA3: significantly differentially expressed germline mutated genes with and without somatic mutations in TNBC. Supplementary Table SB3: significantly differentially expressed germline mutated genes with and without somatic mutations in non-TNBC. Supplementary Table S3A: genes containing both germline and somatic mutations significantly associated with TNBC. Supplementary Table S3B: genes containing both germline and somatic mutations significantly associated with non-TNBC. Supplementary Table S3C: a complete list of 251 genes containing both germline and somatic mutations distinguishing TNBC from non-TNBC. [file 2641370.f1.zip › mat.2641370.v2/TABLE SB3.xlsx]

## Sheet: 07.ERPBC.611.DE.Gem.Som.comm.ge
Table SB3. Significantly differentially expressed germline mutated genes with and without somatic mutations in non-TNBC . red fonts indicate significantly differentially expressed genes)
Genes name	Adjusted expression P-value	Somatic mutation events
TP53	0.771739	230
MAP3K1	0.432726	71
KMT2C	6.82741e-06	68
DMD	5.33211e-107	41
NOTCH2	1.21523e-07	27
DNAH11	0.283647	26
TBX3	0.141331	24
AKAP9	0.362492	22
FBN1	0.090747	22
RELN	2.12625e-56	22
ATM	6.052e-12	21
PRKDC	6.91955e-05	21
PTPRD	0.22784	20
RB1	0.000952258	20
ERBB2	6.43253e-13	19
ASH1L	0.047171	18
MADD	0.00555998	18
PCNT	0.100366	18
ITPR1	8.69085e-15	17
WNK1	0.792558	17
FAM208B	6.02373e-06	16
ABCA8	1.22016e-56	15
ASXL2	1.0135e-05	15
CDC42BPA	3.67588e-07	15
CNTNAP2	1.58346e-25	15
GRIN3A	1.07768e-10	15
PIK3R1	2.21961e-43	15
TNRC6B	1.77581e-13	15
CASZ1	9.91009e-15	14
CTNNA2	0.57632	14
FRMD4A	7.12797e-36	14
KCNH7	0.013265	14
NBPF10	0.0642783	14
TACC2	1.68377e-06	14
ABCC4	0.0434243	13
ADCY9	0.000199733	13
CCDC88C	8.06316e-18	13
FGFR2	8.48955e-05	13
NRXN3	0.0621677	13
SPTBN2	0.00677273	13
ADAMTS16	0.826191	12
ATR	0.0169921	12
BRCA1	6.37952e-14	12
BRCA2	5.15162e-27	12
CASP8	0.0483265	12
CDH12	1.56722e-76	12
EHMT1	7.9252e-09	12
MAGI3	0.000594383	12
MAST1	2.71323e-06	12
MYO10	0.275124	12
ADAM29	0.100592	11
ARID1B	2.03257e-10	11
CDKN1B	0.155179	11
ERBB4	0.254548	11
GRIK1	7.80073e-23	11
GRM3	0.0282475	11
KIAA2026	2.09078e-07	11
LMTK2	0.66264	11
RREB1	0.461948	11
SBF2	9.40942e-19	11
TNS1	3.75472e-104	11
TRIM46	2.88946e-15	11
ZFPM2	5.21435e-15	11
AGTPBP1	3.67906e-16	10
ALS2CR11	8.85732e-18	10
ATAD5	3.6482e-10	10
BLM	1.78828e-34	10
C9orf3	1.04706e-10	10
CEP192	0.000524281	10
CREBBP	0.0646253	10
DNM3	2.0092e-11	10
JMJD1C	4.36708e-24	10
L3MBTL3	1.82556e-09	10
LAMB2	2.11344e-08	10
PDS5B	0.0419893	10
SIK3	1.40618e-12	10
SORBS1	2.5174e-82	10
ARHGEF5	0.0123089	9
BRIP1	1.62435e-30	9
CNTNAP1	0.0926312	9
COL11A1	3.00391e-65	9
COL8A1	1.93145e-14	9
DMBT1	2.41411e-12	9
DOT1L	3.10444e-08	9
FHOD3	2.117e-31	9
FOXP1	0.0444973	9
GPC5	5.6827e-20	9
GREB1	9.66544e-08	9
KSR2	0.141432	9
LEKR1	0.0515731	9
MLLT10	6.7765e-10	9
MYO9B	7.14892e-05	9
OTUD7B	1.33845e-12	9
PDE4D	0.00148692	9
PIK3CB	0.533529	9
POLR2B	0.813717	9
PRDM2	1.37e-13	9
RET	3.30264e-20	9
SPAG17	0.709399	9
TRAK2	0.00269897	9
TTC28	3.76213e-62	9
WRN	4.38565e-13	9
ABCF1	1.42673e-06	8
ADCY3	3.27714e-22	8
ANKRD26	0.427364	8
ARHGAP5	1.78149e-16	8
ASTN2	0.000827001	8
COL1A1	6.17021e-43	8
COL5A2	1.79151e-26	8
CTSF	0.000367973	8
CUX1	0.00165689	8
EWSR1	9.06834e-07	8
EXOC3	0.0203652	8
HIVEP3	0.0198325	8
IGF1R	0.00136397	8
KLHL14	2.45763e-09	8
KRIT1	0.00189262	8
MCC	2.55026e-14	8
MCTP2	4.01679e-26	8
MSH6	6.8632e-07	8
NEK10	0.194412	8
NRIP1	0.823975	8
NUMA1	0.124979	8
PARP8	0.000104436	8
PMS1	9.90532e-05	8
SATB1	7.50548e-32	8
SMG6	1.2596e-11	8
SNX25	0.00276862	8
TET2	0.00180871	8
TRPS1	1.49316e-19	8
XPC	2.33817e-10	8
ARHGEF28	1.0588e-32	7
ATF7IP	0.00316467	7
BAIAP2L1	2.74793e-18	7
BTNL8	1.98836e-11	7
DNMT3A	3.55192e-17	7
EBF1	2.2663e-85	7
ESR1	9.83295e-17	7
FANCA	2.49751e-29	7
FANCC	5.85812e-05	7
HCN1	8.52758e-13	7
KIRREL3	6.32562e-07	7
NEBL	9.19259e-07	7
NNT	0.0355172	7
NRG3	1.45856e-10	7
PLCG2	1.95668e-38	7
PRICKLE2	5.57913e-22	7
PTHLH	1.93886e-11	7
REV1	4.47899e-26	7
SEC16B	5.80276e-12	7
SETBP1	6.36244e-11	7
SLC12A3	0.0338212	7
SMC2	0.000183114	7
TEKT5	4.83304e-26	7
XRN1	1.79598e-07	7
ZBTB38	4.03602e-22	7
ZC3H11A	0.102309	7
ZC3H7B	1.47447e-11	7
ATXN1	0.852191	6
BCAS1	1.25789e-19	6
BCL2L11	0.0002526	6
BRE	0.485936	6
CBX8	1.87168e-42	6
CHEK2	4.47906e-15	6
CREB5	6.35203e-68	6
DAP3	1.19366e-40	6
DCLRE1C	0.690021	6
DSEL	6.57482e-19	6
EBF2	6.50134e-47	6
EGFR	2.90423e-73	6
EHMT2	1.5748e-20	6
EXT1	0.000124283	6
FAF1	2.24698e-05	6
FAM83B	0.0582801	6
GLG1	6.07557e-27	6
GNB3	0.0128077	6
GPR161	5.13175e-11	6
KCNJ6	1.03946e-08	6
MAP4	1.36069e-16	6
MAPT	0.0180205	6
MAST2	8.95715e-20	6
MSH2	1.12828e-05	6
MSH3	0.0236353	6
MYT1	1.29314e-22	6
PALB2	9.28728e-14	6
PCM1	0.00689871	6
PGR	0.429341	6
RAD50	0.430478	6
RIN2	0.418739	6
RIN3	2.9631e-09	6
RNF19A	0.595232	6
RPS6KA3	1.54539e-35	6
SLC4A7	0.0410323	6
SLC6A3	0.0314174	6
SRBD1	0.403256	6
XRCC4	2.75254e-11	6
ZMIZ1	0.0154068	6
ZNRF3	0.0217864	6
ABO	5.30451e-17	5
ACO2	0.0273747	5
AHRR	0.000138372	5
AP4B1	0.0910788	5
ATXN7	3.11144e-09	5
AURKA	1.254e-62	5
BCAS3	0.273427	5
CCDC170	0.178265	5
CCDC30	9.50525e-05	5
CDCA7	0.226356	5
CDKAL1	0.0110688	5
CTNNA3	6.57575e-27	5
DDX58	1.55416e-07	5
ECHDC1	7.95234e-40	5
FGFR4	1.50514e-05	5
FOXM1	2.03346e-70	5
GAREM	6.32831e-11	5
KLHL38	8.77482e-12	5
LGR6	1.83891e-26	5
LRRN2	3.20362e-10	5
MKL1	1.73446e-08	5
MTR	0.0015971	5
NKAPL	1.36403e-85	5
PBX1	1.48561e-11	5
PCSK7	3.11395e-39	5
PHLDB3	8.58868e-31	5
PIK3R3	1.36265e-12	5
POLR2J	7.83589e-14	5
PRKG1	6.85937e-07	5
PTGS2	7.87049e-47	5
PTPN9	0.301699	5
SLC45A1	0.606087	5
SPAG6	0.113904	5
TCF7L2	4.8601e-37	5
TLR1	1.08647e-09	5
TNIP3	0.00142263	5
TTBK1	1.95782e-12	5
TTLL1	4.32676e-06	5
XPA	4.51825e-09	5
XPNPEP3	5.11934e-05	5
ZNF577	1.24093e-05	5
AACS	0.000264074	4
ACBD5	0.0666566	4
ALX4	2.21916e-43	4
APEX1	1.66171e-05	4
ARHGAP24	2.40639e-36	4
ARPC1B	8.18979e-24	4
BAHCC1	6.24704e-07	4
BTN2A1	8.18952e-11	4
CD180	0.00973285	4
CD34	1.15302e-72	4
CDCA7L	1.22333e-09	4
CDYL2	3.13599e-12	4
CHST9	2.04564e-35	4
CMIP	0.00717941	4
EFR3B	4.22866e-08	4
ESRRG	0.123201	4
EXO1	2.98984e-73	4
FAM20A	4.68163e-18	4
FANCG	6.04628e-19	4
FBXL7	0.890325	4
FGFR3	1.01553e-16	4
GATAD2A	2.70779e-17	4
HELQ	2.79857e-33	4
HSD17B2	4.6232e-20	4
INTS10	8.12873e-14	4
KANSL1	0.000105101	4
KCNIP4	2.12891e-15	4
LSP1	0.305375	4
MAPK10	4.96635e-26	4
MDM4	9.744e-05	4
MN1	0.119594	4
MPP4	0.882459	4
MTMR11	0.630282	4
MXD1	0.740414	4
NBN	0.000290324	4
NCOA1	1.26949e-18	4
NEIL1	0.073041	4
NELFA	1.36645e-08	4
NRAP	0.387062	4
PIP4K2A	0.0161086	4
PIWIL4	4.02404e-44	4
PKD2	1.405e-47	4
PKLR	0.00179554	4
PLA2G6	0.000342951	4
POMP	6.32249e-10	4
POR	2.34033e-06	4
RAD51	4.36366e-57	4
RAD51B	5.26066e-15	4
RASA2	5.01326e-14	4
RBBP8	0.0232898	4
RTKN2	2.00326e-46	4
SCFD2	0.0779592	4
SEC14L4	1.36061e-06	4
SIK2	2.4619e-97	4
SLC12A2	0.00245865	4
SLC22A4	0.0265938	4
SMAD3	6.02487e-08	4
SREBF1	2.99919e-15	4
SYT6	0.00133787	4
TGFBR2	1.09717e-73	4
TMEM104	2.7755e-14	4
TOX3	1.94079e-09	4
TPK1	6.44228e-10	4
TRIT1	0.507349	4
USP28	0.000141349	4
VMP1	1.18631e-13	4
WDR43	0.0128058	4
XRCC1	2.39821e-12	4
ZNF101	1.76793e-05	4
ZNF45	4.9268e-05	4
ZNF704	4.06115e-10	4
ACAP1	0.397476	3
ADH1C	2.87394e-56	3
AKT1	2.16734e-16	3
ANO9	5.12921e-29	3
ARRDC3	8.11235e-51	3
BBS2	3.18509e-29	3
CABLES1	0.00240229	3
CAMK1D	0.914094	3
CCDC33	0.0246913	3
CD46	6.49988e-08	3
CDH2	2.19058e-13	3
CDK6	1.10081e-20	3
CLK1	7.63135e-17	3
CPEB3	6.14694e-07	3
CPNE5	0.300948	3
DCLRE1B	0.0383328	3
DNAJC1	1.42537e-26	3
DRG2	0.0635382	3
ECHDC3	1.12324e-27	3
ELL	0.000758596	3
ERCC2	1.59533e-09	3
FAM185A	0.263704	3
FANCE	1.46773e-11	3
FBXL13	0.401464	3
FILIP1L	3.33822e-22	3
GALC	0.141865	3
GIPR	0.15841	3
GRHL1	0.00161436	3
HEPACAM	3.46523e-81	3
HS6ST3	8.31447e-09	3
HSPA4	3.03112e-15	3
ICAM1	0.761497	3
IFNG	0.240649	3
INSC	6.71889e-13	3
IRF1	1.15444e-06	3
KIAA0391	0.0840225	3
KLHL18	0.0487628	3
MGMT	0.0771395	3
MRPS30	3.79817e-12	3
MTHFR	0.606255	3
NF2	0.0816284	3
NIPAL1	2.10463e-19	3
NPAT	1.34264e-07	3
NR3C1	3.42413e-56	3
NTN1	0.018935	3
PEX14	0.13086	3
PFKFB4	6.60901e-47	3
PHF20	1.89211e-05	3
PITPNB	3.07501e-05	3
PRSS42	2.76472e-11	3
SEMA4A	7.53896e-11	3
SGCE	5.32136e-26	3
SH3TC2	8.32092e-59	3
SLAMF1	0.355585	3
SLC7A1	0.435989	3
SNRPB	1.22642e-32	3
SNUPN	0.531975	3
TBC1D29	0.0291011	3
TPD52	1.52271e-52	3
TSPAN16	3.70491e-06	3
USP38	0.00311045	3
WWOX	0.058014	3
XRCC6	0.627939	3
ZNF165	8.27445e-10	3
ACAT1	2.66454e-13	2
ADSSL1	0.00153941	2
ALS2CR12	0.0120641	2
ANKLE1	0.0132773	2
ANKRD16	3.10895e-07	2
ANTXR1	0.311495	2
ANXA13	0.00859778	2
APOBEC3A	0.016882	2
APOPT1	0.471535	2
ARL17B	0.00719201	2
ATE1	0.000204965	2
AURKAIP1	2.81606e-10	2
BARD1	2.608e-28	2
BBOX1	6.85875e-41	2
BCAS4	7.59342e-61	2
BID	0.432323	2
C5orf38	0.140833	2
CASP10	2.44456e-23	2
CCDC102B	0.000170423	2
CCND1	1.23465e-11	2
CCNE1	8.84576e-21	2
CCSER1	2.02168e-08	2
CDC37L1	9.03998e-09	2
CDKN2A	3.14522e-22	2
CEP55	3.02598e-81	2
CFLAR	1.15522e-50	2
CHADL	0.00162929	2
CHEK1	1.12865e-23	2
CMSS1	0.00290801	2
CNTD1	0.0875942	2
CYP1B1	0.00114564	2
DPY19L2P2	0.0176496	2
EGR2	4.6226e-46	2
EMB	0.947207	2
EMID1	0.000254483	2
EPSTI1	2.36498e-09	2
FAM126B	1.77129e-05	2
FGF10	1.6556e-13	2
FNDC3B	1.05337e-12	2
FOXK2	9.44709e-15	2
FTO	1.77658e-29	2
HIST1H2BD	7.60954e-51	2
HIST2H2BF	6.75328e-16	2
HNF4G	0.913956	2
HSCB	0.805595	2
IGFBP5	0.266716	2
INCENP	7.41962e-10	2
IST1	8.34141e-10	2
KCTD1	0.240321	2
KDELC2	8.57317e-16	2
KIAA0907	2.13012e-14	2
KIAA1644	9.23128e-08	2
KLF4	1.19185e-57	2
LMX1B	8.40722e-19	2
LRRC25	0.960973	2
MRPL23	2.99061e-12	2
NREP	1.12295e-26	2
NXPH1	0.00016311	2
PAX9	8.39976e-16	2
POLK	3.96424e-08	2
PPA2	0.000155928	2
PPP2R2B	8.19768e-41	2
PRC1	2.23484e-58	2
PRDM6	0.289564	2
RAB3C	1.32764e-18	2
RALY	1.17969e-17	2
RGS10	2.9046e-15	2
RNF115	6.76195e-09	2
RPA2	0.745129	2
RRS1	1.75299e-15	2
SKAP2	1.02383e-41	2
SLC14A2	3.91968e-23	2
SSBP4	3.6963e-11	2
SSR3	0.879053	2
TAB2	1.44303e-09	2
TERT	1.04787e-14	2
TNFSF10	0.05262	2
TNNT3	2.78898e-38	2
TRAF3	0.0181398	2
VGLL3	3.24392e-32	2
XRCC2	5.3965e-37	2
YJEFN3	0.0297893	2
ZFP57	0.000643334	2
ZNF184	0.0196203	2
ZNF19	0.00821604	2
ZNF365	0.000440077	2
ZNF765	0.000878977	2
ZNF827	0.129975	2
ACER2	2.37424e-07	1
ADH1B	9.78507e-43	1
ALPL	5.17295e-39	1
AMFR	0.0110764	1
ARHGAP27	0.085533	1
ARL4A	6.29379e-52	1
B3GNTL1	3.45731e-07	1
BCKDHB	1.13014e-14	1
BRSK1	1.76684e-08	1
C11orf80	2.41393e-09	1
C20orf196	0.32392	1
CACFD1	6.5143e-61	1
CCL28	2.67638e-37	1
CDKN1A	0.0146043	1
COMT	0.76439	1
COX11	0.70424	1
CTLA4	0.00715387	1
DLX2	0.00569503	1
FGF14	5.41631e-07	1
FOXN3	1.99939e-57	1
FYN	7.04633e-25	1
GMEB2	1.82058e-10	1
GSTM2	1.18545e-19	1
GSTP1	5.46643e-16	1
H19	0.807144	1
ICAM5	2.96216e-19	1
IGFBP3	1.35032e-15	1
IL1A	0.234264	1
INHBB	9.76023e-21	1
KCNN4	4.07635e-11	1
KLF12	4.389e-07	1
KLF5	7.34949e-22	1
KLHDC7A	0.568678	1
LMO4	3.43517e-08	1
LRTOMT	6.82443e-11	1
MIER3	0.466825	1
MMP8	0.0293701	1
MRPL22	1.20884e-12	1
MYEOV	5.27195e-36	1
NAPEPLD	0.888742	1
NECAB2	2.68126e-05	1
NIPSNAP1	1.7876e-33	1
OVOL1	4.10975e-26	1
PCBD1	0.000343909	1
PHGDH	2.92927e-16	1
PKIB	6.42635e-20	1
POLB	1.95222e-15	1
PPP2R1B	1.24456e-44	1
RAD52	1.92694e-06	1
RANBP9	3.78678e-08	1
RCCD1	0.00275826	1
RNF146	6.1746e-18	1
ROPN1L	4.41208e-08	1
RPA1	2.31511e-05	1
SHISA3	8.12195e-41	1
SOD2	1.63033e-36	1
SPINK8	0.366611	1
SUB1	0.0111815	1
SUV39H2	9.36774e-10	1
TGFB1	1.06111e-18	1
TMEM151A	6.07803e-08	1
TMEM69	5.33548e-05	1
TRIM45	4.2526e-12	1
TUBBP1	0.00843012	1
TYMS	3.00913e-40	1
USP44	3.10232e-72	1
WNT3	0.0622699	1
ZNF37A	0.175748	1
ZNRD1	1.96353e-09	1
A4GALT	0.0246031	-
ADAMTS7P3	4.11024e-05	-
AGPAT9	2.14799e-37	-
ATG10	0.000617731	-
ATP6AP1L	0.000249504	-
BABAM1	1.91267e-10	-
BCL2	0.0159683	-
BCL2L15	0.0404813	-
BIN3	2.28925e-05	-
CASC15	1.08036e-05	-
CASC16	2.59285e-10	-
CCDC134	0.000399432	-
CD160	3.62681e-05	-
CD81	3.03702e-09	-
CDKN2B	0.00146504	-
CDKN2C	6.10503e-27	-
CHRAC1	0.000143563	-
CITED4	0.103661	-
CLMP	2.7496e-52	-
CMC1	6.40819e-13	-
CYP19A1	0.723179	-
CYP51A1	4.03404e-06	-
DAP3P2	0.0118093	-
DHFR	0.0469144	-
DHODH	1.28078e-13	-
DIRC3	1.03047e-13	-
DLEU1	6.57526e-08	-
DNAL4	3.91623e-13	-
EGOT	0.0909822	-
EMBP1	0.0430727	-
EMX2OS	1.66817e-33	-
ERRFI1	1.45095e-30	-
FGF19	5.90658e-06	-
FKBPL	6.92197e-23	-
FOXQ1	0.656384	-
GAPDHP72	0.00699709	-
GPX4	0.212555	-
GSTM1	0.972712	-
HSF2	1.2399e-07	-
HSPE1P6	6.4374e-09	-
IGF1	7.45606e-38	-
IGSF21	0.324722	-
IL1B	0.000164935	-
KIF9-AS1	0.0376671	-
LINC00160	1.11459e-13	-
LINC-PINT	3.74345e-12	-
MARK2P9	3.92235e-10	-
MCM8	0.000496795	-
MLK4	0.000155092	-
MMP7	1.83954e-10	-
MYC	1.14617e-27	-
NCOA4	1.23081e-11	-
NEIL2	0.0700804	-
NFIX	4.43965e-24	-
ORAOV1	6.59196e-05	-
PAIP1	5.86847e-05	-
PDXK	2.5418e-06	-
PHLDA3	4.87512e-06	-
PPIL3	0.297961	-
PPP1R18	0.0852537	-
RBX1	8.22747e-12	-
RPL23AP53	2.64534e-10	-
SCAMP2	3.96474e-06	-
SCGN	1.74327e-09	-
SHBG	2.93055e-09	-
SIAH2	6.28851e-37	-
SLC25A21	0.958121	-
SOGA2	4.32234e-12	-
STXBP4	0.121674	-
TBX1	0.178594	-
TEX41	4.95894e-15	-
TNF	0.521288	-
TP53INP2	0.0493798	-
TRIM31	1.54185e-08	-
TUSC1	0.208494	-
UTS2	1.61498e-11	-
VDR	2.9298e-07	-
XRCC3	0.00028835	-
YBX2	0.694295	-
ZKSCAN3	0.106121	-
