# Supplementary material for: Delineation of the Germline and Somatic Mutation Interaction Landscape in Triple-Negative and Non-Triple-Negative Breast Cancer
Source: Int J Genomics. 2020 Jul 6;2020:2641370. doi: 10.1155/2020/2641370 (PMC7364202; doi:10.1155/2020/2641370)
Supplement: Supplementary Materials — All additional results from the analysis are shown in the supplementary tables described. Supplementary Table SG: GWAS information-genetic variants and genes associated with an increased risk of developing breast cancer. Supplementary Table SM: somatic mutated genes significantly associated with TNBC vs. control and non-TNBC vs. control. Supplementary Table SN: nonsomatic mutated genes significantly associated with TNBC vs. control and non-TNBC vs. control. Supplementary Table S2A1: list of all somatic mutated genes significantly associated with TNBC. Supplementary Table S2A2: list of all somatic mutated genes significantly associated with non-TNBC. Supplementary Table S1: differentially expressed and uniquely somatic mutated genes between TNBC and non-TNBC. Supplementary Table SA3: significantly differentially expressed germline mutated genes with and without somatic mutations in TNBC. Supplementary Table SB3: significantly differentially expressed germline mutated genes with and without somatic mutations in non-TNBC. Supplementary Table S3A: genes containing both germline and somatic mutations significantly associated with TNBC. Supplementary Table S3B: genes containing both germline and somatic mutations significantly associated with non-TNBC. Supplementary Table S3C: a complete list of 251 genes containing both germline and somatic mutations distinguishing TNBC from non-TNBC. [file 2641370.f1.zip › mat.2641370.v2/TABLES S3A.xlsx]

## Sheet: 07.TNBC.237.allinfo
Table S3A. Genes containing both germline and somatic mutations significantly associated with TNBC.
Genes	Chromosome position	Genetic variant	GWAS	Expression P-value	Mutation Events
			P-value
CREBBP	16p13.3	rs12920416	8e-07	3.83386e-06	7
ARID1B	6q25.3	rs140842923	3e-06	7.24754e-05	6
BRCA1	17q21.31	rs1799950	0.0002	3.94602e-07	5
ERBB4	2q34	rs13393577	9e-14	9.03183e-41	5
FHOD3	18q12.2	rs9956546	2.9e-06	1.62409e-19	5
TNRC6B	22q13.1	rs12483853	1e-18	9.59053e-06	5
ARHGAP24	4q21.23-q21.3	rs71599425	6e-06	4.05162e-44	4
ARHGAP5	14q12	rs140783387	3e-07	6.22093e-15	4
CNTNAP2	7q35-q36.1	rs10487920	0.00039	2.35289e-05	4
DMD	Xp21.2-p21.1	rs1293906	9e-06	2.41829e-40	4
EFR3B	2p23.3	rs1971136	5e-09	0.000451433	4
KIAA0907	1q22	rs11406084	7e-06	4.49643e-16	4
MSH3	5q14.1	rs6151904	0.0124	2.45327e-30	4
MYO10	5p15.1	rs2562343	0.0092	1.55776e-25	4
MYT1	20q13.33	rs6062356	3e-06	0.00559757	4
RELN	7q22.1	rs17157903	P<0.05	8.35934e-21	4
SPAG17	1p12	rs1962373	1e-06	7.67049e-05	4
TRIM46	1q22	rs4971059	5e-11	1.1401e-17	4
ZFPM2	8q23	rs12546444	8e-11	3.45914e-20	4
ADCY9	16p13.3	rs11076805	1e-08	1.31268e-25	3
AKAP9	7q21.2	rs10644111	3e-11	2.70233e-06	3
ASH1L	1q22	rs10796944	7e-10	5.39119e-06	3
ASXL2	2p23.3	rs144079028	9e-06	0.000116247	3
ATM	11q22.3	rs1801516	0.0002	1.35237e-08	3
ATXN1	6p22.3	rs3819405	2e-08	3.92454e-06	3
BAHCC1	17q25.3	rs8074440	3e-06	0.0279713	3
CASZ1	1p36.22	rs199867187	1e-06	0.000682651	3
CHST9	18q11.2	rs1436904	1e-14	1.51589e-11	3
CNTNAP1	17q21.2	rs72826962	5e-09	8.69268e-09	3
DNAH11	7p15.3	rs7971	2e-08	3.31747e-08	3
EGFR	7p11.2	rs12718945	4e-06	7.03007e-13	3
EXO1	1q43	rs72755295	2e-14	7.42934e-71	3
GREB1	2p25.1	rs113084984	5e-06	7.12278e-24	3
GRM3	7q21.11-q21.12	rs1989796	2e-06	2.47212e-07	3
KMT2C	7q36.1			2.96725e-12	3
LAMB2	3p21.31	rs61729152	6e-06	6.50831e-39	3
MTHFR	1p36.22	rs180113	0.041	8.72396e-13	3
NOTCH2	1p12	rs372562666	6e-27	3.87505e-06	3
PALB2	16p12.2	deletion	0.0004	1.62105e-07	3
RALY	20q11.22	rs2284378	1e-08	7.45318e-29	3
SEC16B	1q25.2	rs575908	3e-06	1.05343e-09	3
SEMA4A	1q22	rs11264454	7e-07	3.19002e-10	3
SETBP1	18q12.3	rs9954058	3e-13	2.05296e-30	3
TBX3	12q24.21	rs1292011	4e-39	3.27878e-21	3
TET2	4q24	rs62331150	2e-11	0.00311617	3
XRN1	3q23	rs12635931	0.0134	0.0102925	3
AACS	12q24.31	rs7307700	0.02	0.000315645	2
AGPAT9	4q21.23	rs1963045	2e-06	3.56233e-06	2
ALS2CR11	2q33.1	rs77688320	3e-09	0.0105605	2
ANO9	11p15.5	rs11410354	2e-06	7.63563e-10	2
ANXA13	8q24.13	rs970821	2e-12	0.0273233	2
BBS2	16q13	rs2303282	3e-07	3.3215e-36	2
BCAS1	20q13.2	rs375506010	5e-06	3.87991e-13	2
BID	22q11.21	rs8190315	P<0.05	7.44688e-22	2
BRCA2	13q13.1	rs11571833	3e-15	3.86266e-31	2
CCDC170	6q25.1	rs60954078	3e-54	4.69861e-67	2
COL5A2	2q32.2	rs73034872	8e-06	6.55591e-11	2
CTNNA2	2p12	rs13025833	1e-07	0.0345569	2
CTNNA3	10q21.3	rs186036693	2e-06	1.09603e-05	2
DOT1L	19p13.3	rs3815308	7e-06	6.68994e-16	2
DSEL	18q22.1	rs17827708	0.009	2.05227e-40	2
ESRRG	1q41	rs11117758	4e-09	0.0037351	2
EXT1	8q24.11	rs10103490	4e-06	2.32839e-05	2
FAM208B	10p15.1	rs55910451	4e-07	8.23046e-14	2
FANCG	9p13.3	rs4986940	0.0279	1.31195e-28	2
FBN1	15q21.1	rs1876206	6e-06	3.12305e-09	2
FBXL13	7q22.1	rs57237364	5e-07	0.000947032	2
FBXL7	5p15.1	rs12652447	0.00056	2.64296e-26	2
FKBPL	6p21.32			2.35878e-34	2
FOXM1	12p13.33	rs2074985	0.034	3.63764e-74	2
HELQ	4q21.23			1.05765e-28	2
HIVEP3	1p34.2	rs79724016	4e-08	1.34304e-06	2
HSPA4	5q31.1	rs6596100	8e-09	0.00222026	2
IGSF21	1p36.13	rs2992756	2e-15	0.00016466	2
INCENP	11q12.3	rs7937840	1e-06	5.33685e-39	2
ITPR1	3p26.1	rs6787391	9e-19	9.36617e-49	2
JMJD1C	10q21.3	rs34044188	3e-07	3.11727e-14	2
KIAA2026	9p24.1	rs10975370	3e-06	3.63931e-06	2
KLHL38	8q24.13	rs58847541	6e-13	2.44987e-09	2
LGR6	1q32.1	rs6678914	3e-12	0.00474272	2
LRRN2	1q32.1	rs4245739	2e-12	0.00032242	2
MN1	22q12.1	rs45589338	2e-10	7.49433e-06	2
MSH6	2p16.3	rs3136337	0.0339	2.67578e-23	2
MTR	1q43	rs1805087	0.02	0.000178808	2
MYO9B	19p13.11	rs7249698	4e-07	4.96342e-18	2
NCOA1	2p23.3	rs200648189	1e-08	1.31974e-19	2
NPAT	11q22.3			0.030431	2
NRXN3	14q24.3-q31.1	rs112056657	2e-06	9.00221e-12	2
NUMA1	11q13.4	rs3750913	0.01	1.88379e-15	2
OTUD7B	1q21.2	rs12048493	9e-14	0.00517777	2
PARP8	5q11.1	rs35951924	1e-11	1.10284e-11	2
PCNT	21q22.3	rs9808759	4e-07	2.52633e-09	2
PCSK7	11q23.3	rs77683187	2e-06	4.21303e-15	2
PHLDB3	19q13.31	rs66849333	1e-06	0.0248789	2
PIK3R1	5q13.1	rs184886	2e-06	6.96904e-39	2
PRKDC	8q11.21			4.86009e-18	2
PRKG1	10q11.23-q21.1	rs1937680	3e-07	5.16457e-24	2
PTPRD	9p24.1-p23	rs76007978	4e-07	0.0322214	2
RB1	13q14.2	rs2854344	0.007	1.69314e-18	2
RBBP8	18q11.2	rs9675999	7e-07	0.00351413	2
RET	10q11.21			0.0359542	2
RIN3	14q32.13	rs11627032	4e-11	1.92104e-07	2
RNF146	6q22.33	rs2180341	3e-08	3.96529e-10	2
SATB1	3p24.3	rs141634179	6e-06	2.06442e-13	2
SPTBN2	11q13.2	rs55908905	8e-06	1.95782e-15	2
TACC2	10q26.13	rs2253762	2e-09	1.06334e-05	2
TCF7L2	10q25.2-q25.3	rs10885405	5e-14	5.24681e-15	2
TEKT5	16p13.13	rs12918713	1e-07	0.0265772	2
TMEM104	17q25.1	rs62084913	9e-06	4.70411e-27	2
TTC28	22q12.1	rs62235681	2e-37	3.38636e-59	2
WRN	8p12	rs1346044	0.02	7.67361e-06	2
ZBTB38	3q23	rs34207738	3e-15	1.03855e-18	2
ZC3H11A	1q32.1	rs59867004	1e-10	0.0297714	2
ZC3H7B	22q13.2	rs73176670	1e-08	0.00013063	2
A4GALT	22q13.2	rs4820477	9e-07	0.00635452	1
ABCA8	17q24.2	rs36059695	6e-08	3.75289e-68	1
ACAP1	17p13.1			0.00121626	1
ACAT1	11q22.3			1.03168e-17	1
ADH1C	4q23	rs698	0.02	1.11945e-64	1
AHRR	5p15.33	rs116095464	4e-09	2.32504e-07	1
ALX4	11p11.2	rs3853291	3e-07	5.99171e-25	1
ASTN2	9q33.1	rs1895062	1e-14	1.85254e-10	1
ATAD5	17q11.2	rs7223535	4e-10	2.61455e-22	1
ATXN7	3p14.1	rs3821902	3e-12	4.30705e-10	1
BABAM1	19p13.11	rs8170	7e-21	8.51133e-23	1
BAIAP2L1	7q21.3-q22.1	rs79518236	1e-07	1.42365e-37	1
BBOX1	11p14.2	rs11354714	3e-06	6.6879e-06	1
BRSK1	19q13.42	rs1172821	4e-06	1.44388e-09	1
C11orf80	11q13.2	rs7570	8e-06	9.22358e-11	1
C9orf3	9q22.32	rs7862618	5e-06	0.000681703	1
CAMK1D	10p13	rs6602595	0.0039	0.000211826	1
CBX8	17q25.3	rs8082452	1e-10	6.22078e-27	1
CCNE1	19q12	rs997669	0.003	2.91282e-61	1
CCSER1	4q22.1	rs9884765	5e-07	5.05994e-13	1
CD34	1q32.2	rs2724379	2e-07	1.59123e-59	1
CD46	1q32.2	rs5780403	9e-06	6.36061e-08	1
CDC42BPA	1q42.13			8.86107e-06	1
CEP55	10q23.33	rs140936696	4e-08	4.31258e-82	1
CHADL	22q13.2			0.0108099	1
COL11A1	1p21.1	rs1451036	0.0082	1.60749e-42	1
COL8A1	3q12.1	rs11298677	5e-09	0.00119174	1
COMT	22q11.21	rs4818	P<0.05	0.0105981	1
CPEB3	10q23.32	rs72807246	3e-06	6.81478e-31	1
CPNE5	6p21.2	rs72856431	9e-07	1.34844e-06	1
CREB5	7p15.1-p14.3	rs17156577	4e-09	4.65149e-21	1
CTSF	11q13.2	rs11344495	2e-06	1.03177e-24	1
DAP3	1q22	rs348196	2e-08	2.59245e-38	1
DDX58	9p21.1	rs1133071	3e-06	0.000661207	1
DNMT3A	2p23.3	rs113953597	1e-08	4.51301e-30	1
DPY19L2P2	7q22.1	rs6946892	1e-07	0.0220357	1
EGR2	10q21.3	rs61865900	2e-09	1.13922e-27	1
EHMT2	6p21.33	rs535586	0.01	1.59138e-26	1
ELL	19p13.11	rs4808801	5e-28	0.00156797	1
EMB	5q11.1	rs72765759	6e-13	2.35399e-05	1
EPSTI1	13q14.11	rs11383827	4e-06	1.38851e-15	1
FAF1	1p32.3	rs140945602	7e-08	8.31004e-12	1
FAM83B	6p12.1	rs924712	4e-06	1.33397e-07	1
FANCA	16q24.3	rs1800330	0.0148	4.09728e-52	1
FGFR2	10q26.13	rs35054928	2E-322	0.0425565	1
FGFR4	5q35.2			3.2542e-05	1
FILIP1L	3q12.1	rs9833888	5e-10	2.82242e-28	1
GAREM	18q12.1	rs117618124	6e-12	8.34581e-17	1
GMEB2	20q13.33	rs311499	3.5x10-5	3.39952e-13	1
GPR161	1q24.2	rs60504827	2e-07	1.6628e-10	1
GRIK1	21q21.3	rs458685	6e-06	2.58683e-16	1
GSTP1	11q13.2	rs1695	0.009	2.00426e-10	1
KANSL1	17q21.31	rs2532263	7e-13	1.96933e-10	1
KCNJ6	21q22.13	rs4817896	0.024	7.44585e-06	1
KLHDC7A	1p36.13	rs2992756	2e-15	1.42225e-20	1
LMX1B	9q33.3	rs10760444	9e-09	1.28803e-12	1
LPA	6q25.3-q26	rs72314471	8e-06	0.049573	1
MADD	11p11.2	rs11039183	6e-06	4.60189e-06	1
MAP3K1	5q11.2	rs62355902	7e-98	1.71759e-14	1
MAP4	3p21.31	rs145407011	1e-06	7.88633e-12	1
MAPT	17q21.31	rs62061734	8e-12	1.56588e-49	1
MAST1	19p13.2	rs117758012	5e-07	2.07315e-15	1
MAST2	1p34.1	rs12077974	2e-07	2.86028e-16	1
MCC	5q22.2	rs6890833	0.034	1.51599e-42	1
MCM8	20p12.3	rs16991615	2e-09	8.57578e-18	1
MMP8	11q22.2	rs1892886	0.007	0.000110195	1
MYC	8q24.21	rs11780156	1e-13	0.00542276	1
MYEOV	11q13.3	rs614367	3e-15	2.41837e-08	1
NEBL	10p12.31			0.000422172	1
NF2	22q12.2	rs140091	4e-10	4.61034e-08	1
NFIX	19p13.13	rs78269692	2e-09	6.43975e-05	1
NIPSNAP1	22q12.2	rs183421746	3e-11	1.21627e-21	1
NRIP1	21q11.2-q21.1	rs2822999	2e-11	4.11555e-19	1
OR2A1	7q35			2.04927e-09	1
OVOL1	11q13.1	rs3903072	2e-12	2.32237e-05	1
PCM1	8p22	rs11779988	2e-06	1.75422e-21	1
PDS5B	13q13.1	rs113855064	1e-07	4.93897e-07	1
PHF20	20q11.22-q11.23	rs201177249	4e-06	0.027229	1
PIK3R3	1p34.1	rs1707302	3e-08	0.00056651	1
PITPNB	22q12.1	rs62235635	1e-27	0.000135164	1
PKD2	4q22.1	rs2725207	6e-07	1.33956e-50	1
POLK	5q13.3	rs5744680	0.027	1.83704e-41	1
POLR2B	4q12	rs4865169	7e-06	0.000461545	1
POR	7q11.23	rs10262966	0.03	1.87924e-15	1
PRC1	15q26.1	rs77554484	1e-15	1.76036e-71	1
PRDM2	1p36.21	rs2235515	0.02	6.09012e-15	1
PRICKLE2	3p14.1			4.44705e-59	1
PTGS2	1q31.1	rs20417	0.002	0.00311659	1
RAD50	5q31.1	c.687delt	4-fold	7.61054e-24	1
REV1	2q11.2			6.59402e-13	1
RIN2	20p11.23	rs4814894	7e-07	1.19483e-06	1
RPS6KA3	Xp22.12			3.72378e-13	1
RREB1	6p24.3	rs9379084	3e-06	5.73506e-12	1
SGCE	7q21.3	rs111307654	1e-12	2.31053e-14	1
SH3TC2	5q32	rs250677	8e-06	0.00919065	1
SHBG	17p13.1	rs858524	0.03	0.028989	1
SIK3	11q23.3	rs201462698	1e-06	1.20979e-26	1
SLAMF1	1q23.3			6.03307e-06	1
SLC12A2	5q23.3	rs36715	4e-06	1.51144e-09	1
SLC4A7	3p24.1	rs4973768	5e-57	1.5071e-13	1
SMG6	17p13.3	rs16952006	3e-06	2.89532e-21	1
SORBS1	10q24.1	rs10450393	0.01	1.63835e-47	1
SRBD1	2p21	rs17033285	0.0089	0.000228307	1
SSBP4	19p13.1	rs7258465	3e-28	0.000306509	1
SULT1E1	4q13.3	rs3736599	0.0053	0.0446617	1
TAB2	6q25.1	rs9485372	4e-12	3.72133e-05	1
TBC1D29	17q11.2	rs111780165	8e-08	0.00046128	1
TBX1	22q11.21	rs34331122	7e-06	1.42746e-05	1
TERT	5p15.33	rs10069690	2e-35	1.46918e-11	1
TGFB1	19q13.1	rs1800470	P<0.05	7.06621e-07	1
TGFBR2	3p24.1	rs17838698	2e-14	1.23793e-54	1
TNNT3	11p15.5	rs909116	7e-07	5.32229e-19	1
TOX3	16q12.1	rs4784227	7e-201	0.00641493	1
TRAK2	2q33.1	rs2714486	7e-10	1.28728e-21	1
TRIT1	1p34.2	rs17570439	0.019	1.15409e-14	1
TTBK1	6p21.1	rs111342015	9e-08	2.59796e-06	1
VDR	12q13.11	rs731236	0.03	0.000201738	1
XPA	9q22.33	rs4284139	0.0284	2.059e-45	1
XPNPEP3	22q13.2	rs62237039	5e-09	0.00127727	1
XRCC6	22q13.2	rs73161324	2e-09	2.01472e-16	1
ZMIZ1	10q22.3	rs1268974	4e-36	1.34876e-05	1
ZNF101	19p13.11	rs72396995	1e-07	0.00367206	1
ZNF827	4q31.21-q31.22	rs6818581	9e-06	6.83838e-05	1
